# Supplementary material
Source: PubMed Central journal article supplement (PMC5098400)
Supplement: NIHMS825077-supplement-Supporting_Info.pdf [file NIHMS825077-supplement-Supporting_Info.pdf]

# Supporting Information

## How Does the Methodology of 3D Structure Preparation Influence the Quality of $pK_a$ Prediction?

Stanislav Geidl, Radka Svobodová Vařeková\*, Veronika Bendová, Lukáš Petrusek, Crina-Maria Ionescu, Zdeněk Jurka, Ruben Abagyan, and Jaroslav Koča\*

E-mail: svobodova@chemi.muni.cz, jkoca@chemi.muni.cz

### Contents

|                                                                                                       |            |
|-------------------------------------------------------------------------------------------------------|------------|
| <b>1 List of Molecules</b>                                                                            | <b>2</b>   |
| <b>2 Summary of Correlations Between Calculated and Experimental <math>pK_a</math> for PM6 Models</b> | <b>39</b>  |
| <b>3 Quality and Statistical Criteria of All the QSPR Models</b>                                      | <b>40</b>  |
| <b>4 Parameters of All the QSPR Models</b>                                                            | <b>55</b>  |
| <b>5 Cross-validation Results</b>                                                                     | <b>67</b>  |
| <b>6 Quality Criteria for Testing of Selected EEM QSPR Models</b>                                     | <b>115</b> |
| <b>7 Description of Making Dissociated and Associated Form of Molecules</b>                           | <b>115</b> |
| <b>8 EEM Models Statistics</b>                                                                        | <b>116</b> |
| <b>9 Geometrical Properties and Troubles of Selected Structures</b>                                   | <b>118</b> |
| 9.1 Class of Molecules: Phenols, Anilines . . . . .                                                   | 118        |
| 9.2 Class of Molecules: Carboxylic Acids . . . . .                                                    | 120        |
| <b>10 Statistical Test of Sensitivity of 3D Structure Source</b>                                      | <b>122</b> |
| <b>11 QSPR Models Limitations</b>                                                                     | <b>123</b> |
| <b>References</b>                                                                                     | <b>124</b> |

# 1 List of Molecules

Table S1: List of molecules.

| NSC number                                         |                                                                                     | CAS number | $pK_a$ |
|----------------------------------------------------|-------------------------------------------------------------------------------------|------------|--------|
| smiles                                             |                                                                                     |            |        |
| <b>Phenols</b>                                     |                                                                                     |            |        |
| NSC_881                                            | 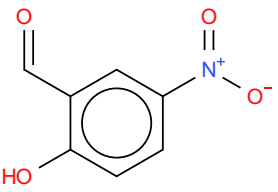   | 97-51-8    | 5.51   |
| <chem>O=Cc1c(ccc(c1)[N+](=O)[O-])O</chem>          |                                                                                     |            |        |
| NSC_1317                                           |    | 100-02-7   | 7.15   |
| <chem>c1c(ccc(c1)O)[N+](=O)[O-]</chem>             |                                                                                     |            |        |
| NSC_1532                                           |   | 51-28-5    | 4.09   |
| <chem>c1(cc(ccc1O)[N+](=O)[O-])[N+](=O)[O-]</chem> |                                                                                     |            |        |
| NSC_1548                                           |  | 90-43-7    | 9.97   |
| <chem>c1ccccc1c1ccccc1O</chem>                     |                                                                                     |            |        |
| NSC_1549                                           |  | 95-65-8    | 10.4   |
| <chem>c1c(ccc(c1C)C)O</chem>                       |                                                                                     |            |        |
| NSC_1551                                           |  | 554-84-7   | 8.36   |
| <chem>c1(cc(ccc1)[N+](=O)[O-])O</chem>             |                                                                                     |            |        |

Table S1: List of molecules.

| NSC number                                            |                                                                                     | CAS number | $pK_a$ |
|-------------------------------------------------------|-------------------------------------------------------------------------------------|------------|--------|
| <b>smiles</b>                                         |                                                                                     |            |        |
| NSC_1552                                              | 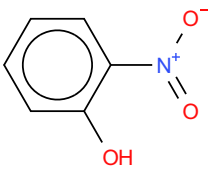   | 88-75-5    | 7.23   |
| <chem>c1c(c(ccc1)O)[N+](=O)[O-]</chem>                |                                                                                     |            |        |
| NSC_1809                                              |    | 94-71-3    | 10.1   |
| <chem>c1c(c(ccc1)O)OCC</chem>                         |                                                                                     |            |        |
| NSC_1858                                              |    | 92-69-3    | 9.55   |
| <chem>c1ccccc1c1ccc(cc1)O</chem>                      |                                                                                     |            |        |
| NSC_1888                                              |   | 99-89-8    | 10.2   |
| <chem>c1(ccc(cc1)C(C)C)O</chem>                       |                                                                                     |            |        |
| NSC_2082                                              |  | 534-52-1   | 4.31   |
| <chem>c1c(cc(c(c1C)O)[N+](=O)[O-])[N+](=O)[O-]</chem> |                                                                                     |            |        |
| NSC_2123                                              |  | 576-26-1   | 10.6   |
| <chem>c1(c(cccc1C)C)O</chem>                          |                                                                                     |            |        |
| NSC_2127                                              |  | 123-08-0   | 7.61   |
| <chem>c1cc(ccc1C=O)O</chem>                           |                                                                                     |            |        |

Table S1: List of molecules.

| NSC number                                                 |                                                                                     | CAS number | $pK_a$ |
|------------------------------------------------------------|-------------------------------------------------------------------------------------|------------|--------|
| <b>smiles</b>                                              |                                                                                     |            |        |
| NSC_2150                                                   | 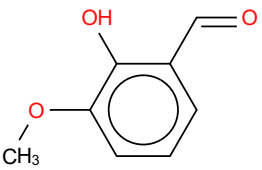   | 148-53-8   | 7.91   |
| <chem>c1(c(c(ccc1)OC)O)C=O</chem>                          |                                                                                     |            |        |
| NSC_2209                                                   |    | 618-45-1   | 10.2   |
| <chem>c1(cc(ccc1)C(C)C)O</chem>                            |                                                                                     |            |        |
| NSC_2440                                                   |    | 121-71-1   | 9.25   |
| <chem>c1c(cccc1O)C(=O)C</chem>                             |                                                                                     |            |        |
| NSC_2599                                                   |   | 95-87-4    | 10.4   |
| <chem>c1cc(cc(c1C)O)C</chem>                               |                                                                                     |            |        |
| NSC_2880                                                   |  | 731-92-0   | 3.85   |
| <chem>c1ccccc1c1cc(cc(c1O)[N+](=O)[O-])[N+](=O)[O-]</chem> |                                                                                     |            |        |
| NSC_4875                                                   |  | 621-34-1   | 9.65   |
| <chem>c1c(cc(cc1)O)OCC</chem>                              |                                                                                     |            |        |
| NSC_4960                                                   |  | 150-76-5   | 10.1   |
| <chem>c1c(ccc(c1)O)OC</chem>                               |                                                                                     |            |        |

Table S1: List of molecules.

| NSC number                           |                                                                                     | CAS number | $pK_a$ |
|--------------------------------------|-------------------------------------------------------------------------------------|------------|--------|
| <b>smiles</b>                        |                                                                                     |            |        |
| NSC_4965                             | 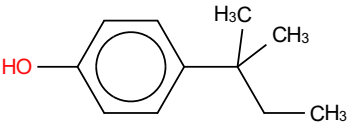   | 80-46-6    | 10.4   |
| <chem>c1c(ccc(c1)O)C(CC)(C)C</chem>  |                                                                                     |            |        |
| NSC_4969                             |    | 93-51-6    | 10.3   |
| <chem>c1(ccc(cc1OC)C)O</chem>        |                                                                                     |            |        |
| NSC_5103                             |    | 88-69-7    | 10.5   |
| <chem>c1c(c(ccc1)O)C(C)C</chem>      |                                                                                     |            |        |
| NSC_5105                             |   | 2078-54-8  | 11.1   |
| <chem>c1(c(cccc1C(C)C)C(C)C)O</chem> |                                                                                     |            |        |
| NSC_5296                             |  | 697-82-5   | 10.7   |
| <chem>c1c(cc(c(c1O)C)C)C</chem>      |                                                                                     |            |        |
| NSC_5353                             |  | 527-60-6   | 10.9   |
| <chem>c1(cc(cc(c1O)C)C)C</chem>      |                                                                                     |            |        |
| NSC_5387                             |  | 119-33-5   | 7.6    |

Table S1: List of molecules.

| NSC number                                                   |                                                                                     | CAS number | $pK_a$ |
|--------------------------------------------------------------|-------------------------------------------------------------------------------------|------------|--------|
| <b>smiles</b>                                                |                                                                                     |            |        |
| <chem>c1(ccc(cc1[N+](=O)[O-])C)O</chem>                      |                                                                                     |            |        |
| NSC_6215                                                     | 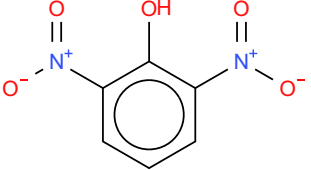   | 573-56-8   | 3.97   |
| <chem>c1(c(cccc1[N+](=O)[O-])[N+](=O)[O-])O</chem>           |                                                                                     |            |        |
| NSC_6769                                                     |    | 97-54-1    | 9.88   |
| <chem>c1c(c(ccc1/C=C/C)O)OC</chem>                           |                                                                                     |            |        |
| NSC_7739                                                     |   | 131-89-5   | 4.52   |
| <chem>C1C(CCCC1)c1cc(cc(c1O)[N+](=O)[O-])[N+](=O)[O-]</chem> |                                                                                     |            |        |
| NSC_8768                                                     |  | 108-39-4   | 10.1   |
| <chem>c1c(cccc1O)C</chem>                                    |                                                                                     |            |        |
| NSC_8873                                                     |  | 620-17-7   | 9.9    |
| <chem>c1c(cccc1O)CC</chem>                                   |                                                                                     |            |        |
| NSC_8885                                                     |  | 698-71-5   | 10.1   |
| <chem>c1c(cc(cc1O)C)CC</chem>                                |                                                                                     |            |        |

Table S1: List of molecules.

| NSC number                              |                                                                                     | CAS number | $pK_a$ |
|-----------------------------------------|-------------------------------------------------------------------------------------|------------|--------|
| smiles                                  |                                                                                     |            |        |
| NSC_8895                                | 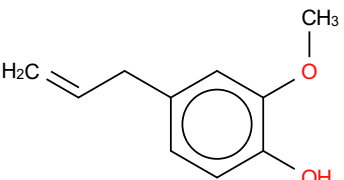   | 97-53-0    | 10.2   |
| <chem>c1c(c(ccc1CC=C)O)OC</chem>        |                                                                                     |            |        |
| NSC_9268                                |    | 108-68-9   | 10.2   |
| <chem>c1c(cc(cc1C)C)O</chem>            |                                                                                     |            |        |
| NSC_9885                                |    | 622-62-8   | 10.1   |
| <chem>c1c(ccc(c1)O)OCC</chem>           |                                                                                     |            |        |
| NSC_10112                               |   | 90-00-6    | 10.2   |
| <chem>c1(ccccc1O)CC</chem>              |                                                                                     |            |        |
| NSC_11215                               |  | 89-83-8    | 10.6   |
| <chem>c1(cc(c(cc1)C(C)C)O)C</chem>      |                                                                                     |            |        |
| NSC_12987                               |  | 5428-54-6  | 8.59   |
| <chem>c1c(ccc(c1O)C)[N+](=O)[O-]</chem> |                                                                                     |            |        |
| NSC_14881                               |  | 87-17-2    | 7.4    |
| <chem>c1(ccccc1C(=O)Nc1ccccc1)O</chem>  |                                                                                     |            |        |

Table S1: List of molecules.

| NSC number                              |                                                                                     | CAS number | $pK_a$ |
|-----------------------------------------|-------------------------------------------------------------------------------------|------------|--------|
| smiles                                  |                                                                                     |            |        |
| NSC_15351                               | 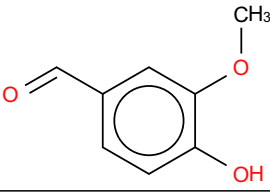   | 121-33-5   | 7.4    |
| <chem>O=Cc1cc(c(cc1)O)OC</chem>         |                                                                                     |            |        |
| NSC_17588                               |    | 580-51-8   | 9.64   |
| <chem>c1ccccc1c1cccc(c1)O</chem>        |                                                                                     |            |        |
| NSC_21735                               |    | 150-19-6   | 9.65   |
| <chem>c1c(cc(cc1)O)OC</chem>            |                                                                                     |            |        |
| NSC_23076                               |   | 95-48-7    | 10.3   |
| <chem>c1(ccccc1O)C</chem>               |                                                                                     |            |        |
| NSC_41205                               |  | 2042-14-0  | 8.62   |
| <chem>c1(ccc(cc1[N+](=O)[O-])O)C</chem> |                                                                                     |            |        |
| NSC_60291                               |  | 3180-09-4  | 10.6   |
| <chem>c1c(c(ccc1)O)CCCC</chem>          |                                                                                     |            |        |
| NSC_60735                               |  | 620-24-6   | 9.83   |
| <chem>c1cc(cc(c1)CO)O</chem>            |                                                                                     |            |        |



Table S1: List of molecules.

| NSC number                      |                                                                                     | CAS number | $pK_a$ |
|---------------------------------|-------------------------------------------------------------------------------------|------------|--------|
| <b>smiles</b>                   |                                                                                     |            |        |
| NSC_62011                       | 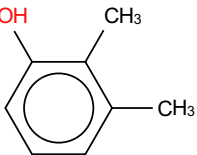   | 526-75-0   | 10.5   |
| <chem>c1(c(ccc1C)O)C</chem>     |                                                                                     |            |        |
| NSC_62012                       |    | 123-07-9   | 10     |
| <chem>c1c(ccc(c1)CC)O</chem>    |                                                                                     |            |        |
| NSC_65646                       |    | 644-35-9   | 10.5   |
| <chem>c1(ccccc1O)CCC</chem>     |                                                                                     |            |        |
| NSC_65647                       |   | 645-56-7   | 10.3   |
| <chem>c1c(ccc(c1)CCC)O</chem>   |                                                                                     |            |        |
| NSC_70955                       |  | 500-99-2   | 9.34   |
| <chem>c1c(cc(cc1O)OC)OC</chem>  |                                                                                     |            |        |
| NSC_82996                       |  | 621-59-0   | 8.89   |
| <chem>O=Cc1ccc(c(c1)O)OC</chem> |                                                                                     |            |        |
| NSC_85475                       |  | 4383-07-7  | 10.2   |
| <chem>c1(cc(c(cc1)O)CO)C</chem> |                                                                                     |            |        |

Table S1: List of molecules.

| NSC number                                                    |                                                                                     | CAS number | $pK_a$ |
|---------------------------------------------------------------|-------------------------------------------------------------------------------------|------------|--------|
| smiles                                                        |                                                                                     |            |        |
| NSC_87078                                                     | 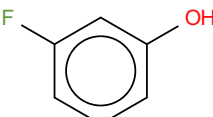   | 372-20-3   | 9.21   |
| <chem>Fc1cc(ccc1)O</chem>                                     |                                                                                     |            |        |
| NSC_90441                                                     |    | 329-71-5   | 5.21   |
| <chem>c1cc(cc(c1[N+](=O)[O-])O)[N+](=O)[O-]</chem>            |                                                                                     |            |        |
| NSC_95810                                                     |    | 885-82-5   | 6.73   |
| <chem>c1c(ccc1)c1cc(c(cc1)O)[N+](=O)[O-]</chem>               |                                                                                     |            |        |
| NSC_156083                                                    |   | 66-56-8    | 4.96   |
| <chem>c1ccc(c(c1[N+](=O)[O-])[N+](=O)[O-])O</chem>            |                                                                                     |            |        |
| NSC_202753                                                    |  | 88-85-7    | 4.62   |
| <chem>c1c(c(cc1[N+](=O)[O-])[N+](=O)[O-])O)[C@@H](CC)C</chem> |                                                                                     |            |        |
| NSC_227926                                                    |  | 623-05-2   | 9.82   |
| <chem>c1cc(ccc1O)CO</chem>                                    |                                                                                     |            |        |

Table S1: List of molecules.

| NSC number                    |                                                                                   | CAS number | $pK_a$ |
|-------------------------------|-----------------------------------------------------------------------------------|------------|--------|
| <b>smiles</b>                 |                                                                                   |            |        |
| NSC_249188                    | 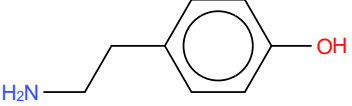 | 51-67-2    | 9.77   |
| <chem>c1(ccc(cc1)CCN)O</chem> |                                                                                   |            |        |

Table S1: List of molecules.

| NSC number              |                                                                                     | CAS number | $pK_a$ |
|-------------------------|-------------------------------------------------------------------------------------|------------|--------|
| smiles                  |                                                                                     |            |        |
| <b>Carboxylic acids</b> |                                                                                     |            |        |
| NSC_166                 | 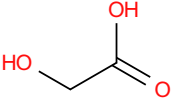   | 79-14-1    | 3.83   |
| OCC(=O)O                |                                                                                     |            |        |
| NSC_179                 |    | 127-17-3   | 2.45   |
| C(=O)(O)C(=O)C          |                                                                                     |            |        |
| NSC_295                 |    | 1821-12-1  | 4.76   |
| c1ccccc1CCCC(=O)O       |                                                                                     |            |        |
| NSC_402                 |   | 405-50-5   | 4.24   |
| Fc1ccc(cc1)CC(=O)O      |                                                                                     |            |        |
| NSC_836                 |  | 595-46-0   | 3.15   |
| C(C(=O)O)(C)(C)C(=O)O   |                                                                                     |            |        |
| NSC_1112                |  | 1759-53-1  | 4.83   |
| C1C(C1)C(=O)O           |                                                                                     |            |        |
| NSC_2159                |  | 5292-21-7  | 4.8    |
| C1C(CCCC1)CC(=O)O       |                                                                                     |            |        |
| NSC_2192                |  | 111-14-8   | 4.8    |
| C(=O)(O)CCCCC=O         |                                                                                     |            |        |

Table S1: List of molecules.

| NSC number                        |                                                                                     | CAS number | $pK_a$ |
|-----------------------------------|-------------------------------------------------------------------------------------|------------|--------|
| smiles                            |                                                                                     |            |        |
| NSC_2752                          | 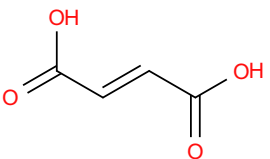   | 110-17-8   | 3.03   |
| <chem>C(=C\C(=O)O)/C(=O)O</chem>  |                                                                                     |            |        |
| NSC_3716                          |    | 123-76-2   | 4.64   |
| <chem>C(=O)(O)CCC(=O)C</chem>     |                                                                                     |            |        |
| NSC_3806                          |    | 300-85-6   | 4.41   |
| <chem>C[C@@H](O)CC(=O)O</chem>    |                                                                                     |            |        |
| NSC_4126                          |   | 646-07-1   | 4.84   |
| <chem>C(=O)(O)CCC(C)C</chem>      |                                                                                     |            |        |
| NSC_4255                          |  | 1877-75-4  | 3.21   |
| <chem>c1cc(ccc1OCC(=O)O)OC</chem> |                                                                                     |            |        |
| NSC_4505                          |  | 594-61-6   | 3.61   |
| <chem>C(C(=O)O)(O)(C)C</chem>     |                                                                                     |            |        |
| NSC_4765                          |  | 79-10-7    | 4.26   |
| <chem>C(=C)C(=O)O</chem>          |                                                                                     |            |        |
| NSC_5024                          |  | 124-07-2   | 4.89   |
| <chem>C(=O)(O)CCCCCCC</chem>      |                                                                                     |            |        |

Table S1: List of molecules.

| NSC number |                                                                                                                      | CAS number | $pK_a$ |
|------------|----------------------------------------------------------------------------------------------------------------------|------------|--------|
|            | smiles                                                                                                               |            |        |
| NSC_5025   | 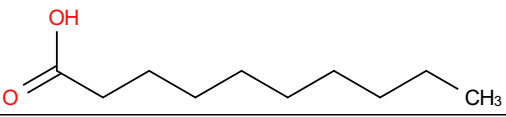                                    | 334-48-5   | 4.9    |
|            | <chem>C(=O)(O)CCCCCCCCC</chem>                                                                                       |            |        |
| NSC_5026   |                                    | 143-07-7   | 5.3    |
|            | <chem>C(=O)(O)CCCCCCCCCCC</chem>                                                                                     |            |        |
| NSC_5028   |                                    | 544-63-8   | 4.9    |
|            | <chem>C(=O)(O)CCCCCCCCCCCC</chem>                                                                                    |            |        |
| NSC_5165   |                                    | 1878-85-9  | 3.23   |
|            | <chem>c1(cccc1OC)OCC(=O)O</chem>                                                                                     |            |        |
| NSC_5293   |                                   | 1878-49-5  | 3.23   |
|            | <chem>c1c(c(ccc1)C)OCC(=O)O</chem>                                                                                   |            |        |
| NSC_5398   |                                   | 104-03-0   | 3.85   |
|            | <chem>c1cc(ccc1[N+](=O)[O-])CC(=O)O</chem>                                                                           |            |        |
| NSC_6135   |                                  | 81-25-4    | 4.98   |
|            | <chem>[C@@H]([C@@H]1[C@]2([C@H](C[C@H]3[C@H]([C@@H]2CC1)[C@@H](C[C@H]1[C@@]3(CC[C@H](C1)O)C)O)O)C)(C)CCC(=O)O</chem> |            |        |

Table S1: List of molecules.

| NSC number                                               |  | CAS number | $pK_a$ |
|----------------------------------------------------------|--|------------|--------|
| smiles                                                   |  |            |        |
| NSC_6225                                                 |  | 643-43-6   | 3.5    |
| <chem>c1(cc(ccc1CC(=O)O)[N+](=O)[O-])[N+](=O)[O-]</chem> |  |            |        |
| NSC_7304                                                 |  | 116-53-0   | 4.81   |
| <chem>C(=O)([C@@H](CC)C)O</chem>                         |  |            |        |
| NSC_7393                                                 |  | 79-41-4    | 4.65   |
| <chem>C(=O)(O)C(=C)C</chem>                              |  |            |        |
| NSC_7622                                                 |  | 124-04-9   | 4.44   |
| <chem>C(=O)(CCCC(=O)O)O</chem>                           |  |            |        |
| NSC_7925                                                 |  | 90-64-2    | 3.41   |
| <chem>c1(ccccc1)[C@@H](C(=O)O)O</chem>                   |  |            |        |
| NSC_8124                                                 |  | 141-82-2   | 2.85   |
| <chem>C(C(=O)O)C(=O)O</chem>                             |  |            |        |
| NSC_8266                                                 |  | 142-62-1   | 4.88   |
| <chem>C(=O)(O)CCCC</chem>                                |  |            |        |

Table S1: List of molecules.

| NSC number                                  |                                                                                     | CAS number | $pK_a$ |
|---------------------------------------------|-------------------------------------------------------------------------------------|------------|--------|
| smiles                                      |                                                                                     |            |        |
| NSC_8406                                    | 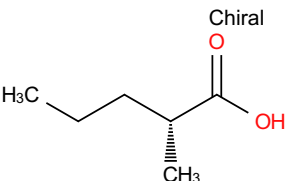   | 97-61-0    | 4.79   |
| <chem>C(=O)([C@@H](CCC)C)O</chem>           |                                                                                     |            |        |
| NSC_8415                                    |    | 107-92-6   | 4.82   |
| <chem>C(CC)C(=O)O</chem>                    |                                                                                     |            |        |
| NSC_8742                                    |    | 117-34-0   | 3.94   |
| <chem>c1ccccc1[C@@H](c1ccccc1)C(=O)O</chem> |                                                                                     |            |        |
| NSC_8751                                    |  | 107-93-7   | 4.17   |
| <chem>C(=C\C(=O)O)/C</chem>                 |                                                                                     |            |        |
| NSC_8758                                    |  | 88-09-5    | 4.71   |
| <chem>C(CC)(CC)C(=O)O</chem>                |                                                                                     |            |        |
| NSC_8881                                    |  | 149-57-5   | 4.7    |
| <chem>C(=O)(O)[C@@H](CC)CCCC</chem>         |                                                                                     |            |        |
| NSC_8999                                    |  | 80-59-1    | 4.96   |
| <chem>C(=C\C(=O)O)/C/C</chem>               |                                                                                     |            |        |



Table S1: List of molecules.

| NSC number                           |                                                                                     | CAS number | $pK_a$ |
|--------------------------------------|-------------------------------------------------------------------------------------|------------|--------|
| smiles                               |                                                                                     |            |        |
| NSC_9238                             | 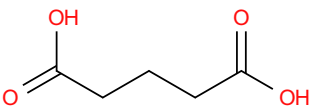   | 110-94-1   | 4.34   |
| <chem>C(=O)(O)CCCC(=O)O</chem>       |                                                                                     |            |        |
| NSC_9272                             |    | 501-52-0   | 4.66   |
| <chem>c1(ccccc1)CCC(=O)O</chem>      |                                                                                     |            |        |
| NSC_9810                             |    | 122-59-8   | 3.17   |
| <chem>c1ccccc1OCC(=O)O</chem>        |                                                                                     |            |        |
| NSC_10232                            |   | 348-10-7   | 3.08   |
| <chem>Fc1c(cccc1)OCC(=O)O</chem>     |                                                                                     |            |        |
| NSC_15772                            |  | 86-87-3    | 4.23   |
| <chem>c1cccc2c1c(ccc2)CC(=O)O</chem> |                                                                                     |            |        |
| NSC_16045                            |  | 595-37-9   | 5.03   |
| <chem>C(C)C(C)(C)C(=O)O</chem>       |                                                                                     |            |        |
| NSC_16682                            |  | 306-08-1   | 4.41   |
| <chem>c1c(c(ccc1CC(=O)O)O)OC</chem>  |                                                                                     |            |        |

Table S1: List of molecules.

| NSC number                         |                                                                                     | CAS number | $pK_a$ |
|------------------------------------|-------------------------------------------------------------------------------------|------------|--------|
| smiles                             |                                                                                     |            |        |
| NSC_19493                          | 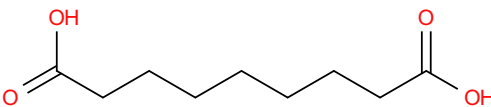   | 123-99-9   | 4.55   |
| <chem>O=C(O)CCCCCCC(=O)O</chem>    |                                                                                     |            |        |
| NSC_25201                          |    | 516-05-2   | 3.12   |
| <chem>C(=O)(O)C(C(=O)O)C</chem>    |                                                                                     |            |        |
| NSC_25949                          |    | 110-15-6   | 4.21   |
| <chem>C(=O)(O)CCC(=O)O</chem>      |                                                                                     |            |        |
| NSC_25952                          |   | 505-48-6   | 4.52   |
| <chem>C(=O)(O)CCCCCCC(=O)O</chem>  |                                                                                     |            |        |
| NSC_27785                          |  | 298-12-4   | 3.3    |
| <chem>C(=O)(O)C=O</chem>           |                                                                                     |            |        |
| NSC_27799                          |  | 104-01-8   | 4.36   |
| <chem>c1cc(ccc1OC)CC(=O)O</chem>   |                                                                                     |            |        |
| NSC_30092                          |  | 6324-11-4  | 3.02   |
| <chem>c1c(c(ccc1)O)OCC(=O)O</chem> |                                                                                     |            |        |
| NSC_30112                          |  | 111-16-0   | 4.51   |
| <chem>C(=O)(O)CCCCCCC(=O)O</chem>  |                                                                                     |            |        |

Table S1: List of molecules.

| NSC number                                    |                                                                                     | CAS number | $pK_a$ |
|-----------------------------------------------|-------------------------------------------------------------------------------------|------------|--------|
| smiles                                        |                                                                                     |            |        |
| NSC_35913                                     | 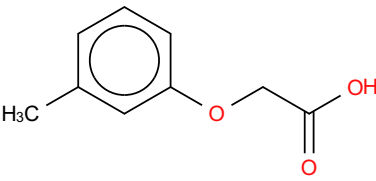   | 1643-15-8  | 3.2    |
| <chem>c1c(cc(cc1)C)OCC(=O)O</chem>            |                                                                                     |            |        |
| NSC_37409                                     |    | 1878-87-1  | 2.9    |
| <chem>c1c(c(ccc1)[N+](=O)[O-])OCC(=O)O</chem> |                                                                                     |            |        |
| NSC_38176                                     |    | 940-64-7   | 3.21   |
| <chem>c1cc(ccc1OCC(=O)O)C</chem>              |                                                                                     |            |        |
| NSC_38177                                     |  | 2088-24-6  | 3.14   |
| <chem>c1c(cc(cc1)OC)OCC(=O)O</chem>           |                                                                                     |            |        |
| NSC_49589                                     |  | 405-79-8   | 3.13   |
| <chem>c1c(ccc(c1)F)OCC(=O)O</chem>            |                                                                                     |            |        |

Table S1: List of molecules.

| NSC number                                                                                                                      |                                                                                                  | CAS number | p <i>K<sub>a</sub></i> |
|---------------------------------------------------------------------------------------------------------------------------------|--------------------------------------------------------------------------------------------------|------------|------------------------|
| smiles                                                                                                                          |                                                                                                  |            |                        |
| NSC_56192                                                                                                                       | 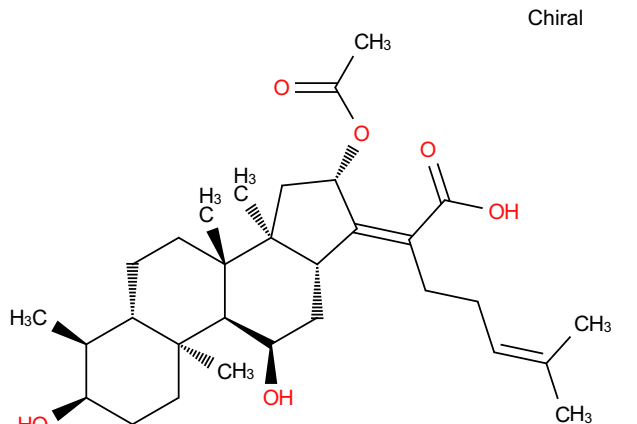 <p>Chiral</p> | 6990-06-3  | 5.35                   |
| <chem>C(=C\1/[C@H](C[C@]2([C@H]1C[C@H]([C@@H]1[C@@]2(CC[C@H]2[C@@]1(CC[C@H]([C@H]2C)O)C)C)O)C)OC(=O)C(\CCC=C(C)C)/C(=O)O</chem> |                                                                                                  |            |                        |
| NSC_61983                                                                                                                       |                | 1185-39-3  | 5.02                   |
| <chem>C(CC)C(C)(C)C(=O)O</chem>                                                                                                 |                                                                                                  |            |                        |
| NSC_62774                                                                                                                       |               | 144-62-7   | 1.25                   |
| <chem>C(=O)(O)C(=O)O</chem>                                                                                                     |                                                                                                  |            |                        |
| NSC_62780                                                                                                                       |               | 79-31-2    | 4.84                   |
| <chem>C(C)(C)C(=O)O</chem>                                                                                                      |                                                                                                  |            |                        |
| NSC_62783                                                                                                                       |               | 503-74-2   | 4.77                   |
| <chem>C(C)(C)CC(=O)O</chem>                                                                                                     |                                                                                                  |            |                        |
| NSC_62787                                                                                                                       |               | 112-05-0   | 4.95                   |
| <chem>C(=O)(O)CCCCCCCC</chem>                                                                                                   |                                                                                                  |            |                        |
| NSC_65449                                                                                                                       |               | 75-98-9    | 5.03                   |
| <chem>C(C)(C)(C)C(=O)O</chem>                                                                                                   |                                                                                                  |            |                        |

Table S1: List of molecules.

| NSC number                         |                                                                                     | CAS number | $pK_a$ |
|------------------------------------|-------------------------------------------------------------------------------------|------------|--------|
| smiles                             |                                                                                     |            |        |
| NSC_65595                          | 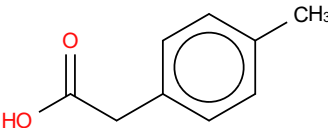   | 622-47-9   | 4.37   |
| <chem>c1cc(ccc1CC(=O)O)C</chem>    |                                                                                     |            |        |
| NSC_65637                          |    | 2270-20-4  | 4.88   |
| <chem>c1ccccc1CCCCCC(=O)O</chem>   |                                                                                     |            |        |
| NSC_67957                          |    | 617-31-2   | 3.59   |
| <chem>C(CC)[C@@H](O)C(=O)O</chem>  |                                                                                     |            |        |
| NSC_73191                          |   | 102-32-9   | 4.25   |
| <chem>c1c(c(ccc1CC(=O)O)O)O</chem> |                                                                                     |            |        |
| NSC_77366                          |  | 76-05-1    | 0.52   |
| <chem>C(F)(F)(F)C(=O)O</chem>      |                                                                                     |            |        |
| NSC_88344                          |  | 331-25-9   | 4.13   |
| <chem>Fc1cc(ccc1)CC(=O)O</chem>    |                                                                                     |            |        |
| NSC_93819                          |  | 99-66-1    | 4.6    |
| <chem>C(CCC)(CCC)C(=O)O</chem>     |                                                                                     |            |        |

Table S1: List of molecules.

| NSC number                                     |                                                                                     | CAS number | p <i>K<sub>a</sub></i> |
|------------------------------------------------|-------------------------------------------------------------------------------------|------------|------------------------|
| smiles                                         |                                                                                     |            |                        |
| NSC_93911                                      | 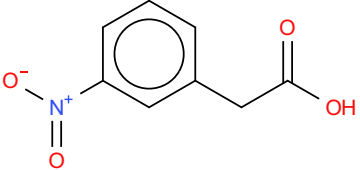   | 1877-73-2  | 3.97                   |
| <chem>c1c(cc(cc1)[N+](=O)[O-])CC(=O)O</chem>   |                                                                                     |            |                        |
| NSC_96615                                      |    | 601-75-2   | 2.96                   |
| <chem>C(C)C(C(=O)O)C(=O)O</chem>               |                                                                                     |            |                        |
| NSC_132953                                     |    | 64-19-7    | 4.76                   |
| <chem>C(=O)(O)C</chem>                         |                                                                                     |            |                        |
| NSC_166278                                     |   | 1798-11-4  | 2.89                   |
| <chem>O(c1ccc(cc1)[N+](=O)[O-])CC(=O)O</chem>  |                                                                                     |            |                        |
| NSC_193418                                     |  | 1878-88-2  | 2.95                   |
| <chem>O(c1cccc(c1)[N+](=O)[O-])CC(=O)O</chem>  |                                                                                     |            |                        |
| NSC_206946                                     |  | 3724-65-0  | 4.17                   |
| <chem>C(=C\C(=O)O)\C</chem>                    |                                                                                     |            |                        |
| NSC_256857                                     |  | 15687-27-1 | 4.91                   |
| <chem>c1(ccc(cc1)[C@@H](C(=O)O)C)CC(C)C</chem> |                                                                                     |            |                        |

Table S1: List of molecules.

| NSC number                                  |                                                                                     | CAS number | $pK_a$ |
|---------------------------------------------|-------------------------------------------------------------------------------------|------------|--------|
| smiles                                      |                                                                                     |            |        |
| NSC_281243                                  | 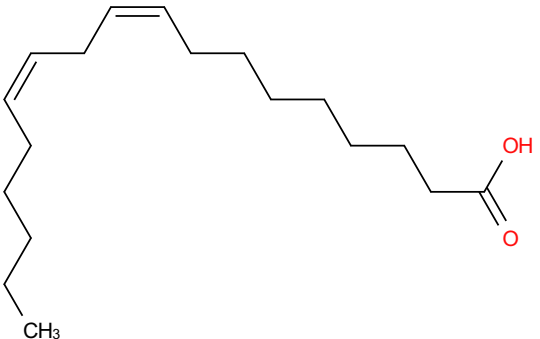   | 60-33-3    | 4.77   |
| <chem>C(=C\C/C=C\CCCCCCCC(=O)O)\CCCC</chem> |                                                                                     |            |        |
| NSC_367919                                  |    | 598-82-3   | 3.86   |
| <chem>[C@@H](C(=O)O)(C)O</chem>             |                                                                                     |            |        |
| NSC_401846                                  |   | 515-30-0   | 3.53   |
| <chem>c1ccccc1[C@@](C)(O)C(=O)O</chem>      |                                                                                     |            |        |
| NSC_406833                                  |  | 109-52-4   | 4.84   |
| <chem>C(=O)(O)CCCC</chem>                   |                                                                                     |            |        |

Table S1: List of molecules.

| NSC number                                         |                                                                                     | CAS number | $pK_a$ |
|----------------------------------------------------|-------------------------------------------------------------------------------------|------------|--------|
| smiles                                             |                                                                                     |            |        |
| <b>Anilines</b>                                    |                                                                                     |            |        |
| NSC_284                                            | 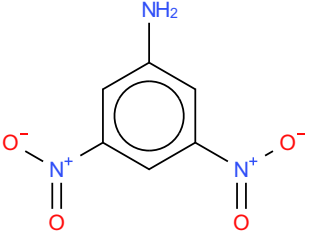   | 618-87-1   | 0.3    |
| <chem>c1c(cc(cc1N)[N+](=O)[O-])[N+](=O)[O-]</chem> |                                                                                     |            |        |
| NSC_579                                            |    | 371-40-4   | 4.65   |
| <chem>Fc1ccc(cc1)N</chem>                          |                                                                                     |            |        |
| NSC_1546                                           |    | 591-27-5   | 4.37   |
| <chem>c1ccc(cc1O)N</chem>                          |                                                                                     |            |        |
| NSC_2032                                           |  | 60-09-3    | 2.82   |
| <chem>N(=N\c1ccccc1)/c1ccc(cc1)N</chem>            |                                                                                     |            |        |
| NSC_2075                                           |  | 99-52-5    | 1.04   |
| <chem>c1cc(cc(c1N)C)[N+](=O)[O-]</chem>            |                                                                                     |            |        |
| NSC_2759                                           |  | 89-62-3    | 0.4    |
| <chem>c1cc(cc(c1N)[N+](=O)[O-])C</chem>            |                                                                                     |            |        |
| NSC_3122                                           |  | 90-04-0    | 4.53   |
| <chem>c1c(c(ccc1)N)OC</chem>                       |                                                                                     |            |        |



Table S1: List of molecules.

| NSC number                               |                                                                                     | CAS number | $pK_a$ |
|------------------------------------------|-------------------------------------------------------------------------------------|------------|--------|
| <b>smiles</b>                            |                                                                                     |            |        |
| NSC_4138                                 | 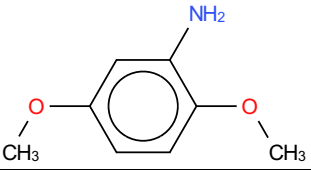   | 102-56-7   | 3.93   |
| <chem>c1(ccc(cc1N)OC)OC</chem>           |                                                                                     |            |        |
| NSC_4540                                 |    | 98-16-8    | 3.49   |
| <chem>c1c(cccc1C(F)(F)F)N</chem>         |                                                                                     |            |        |
| NSC_4688                                 |    | 94-09-7    | 2.51   |
| <chem>c1c(ccc(c1)N)C(=O)OCC</chem>       |                                                                                     |            |        |
| NSC_5297                                 |  | 137-17-7   | 5.09   |
| <chem>c1c(c(cc(c1N)C)C)C</chem>          |                                                                                     |            |        |
| NSC_5509                                 |  | 96-96-8    | 0.77   |
| <chem>c1c(c(ccc1OC)N)[N+](=O)[O-]</chem> |                                                                                     |            |        |
| NSC_5510                                 |  | 99-59-2    | 2.49   |
| <chem>c1cc(cc(c1OC)N)[N+](=O)[O-]</chem> |                                                                                     |            |        |
| NSC_7098                                 |  | 87-62-7    | 3.95   |
| <chem>c1(cccc(c1N)C)C</chem>             |                                                                                     |            |        |

Table S1: List of molecules.

| NSC number                         |                                                                                     | CAS number | $pK_a$ |
|------------------------------------|-------------------------------------------------------------------------------------|------------|--------|
| <b>smiles</b>                      |                                                                                     |            |        |
| NSC_7099                           | 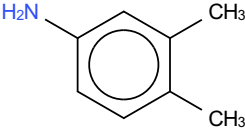   | 95-64-7    | 5.28   |
| <chem>c1c(c(ccc1N)C)C</chem>       |                                                                                     |            |        |
| NSC_7198                           |    | 99-88-7    | 4.85   |
| <chem>c1cc(ccc1C(C)C)N</chem>      |                                                                                     |            |        |
| NSC_7631                           |    | 536-90-3   | 4.24   |
| <chem>c1c(cc(cc1)N)OC</chem>       |                                                                                     |            |        |
| NSC_7637                           |   | 99-03-6    | 3.56   |
| <chem>c1c(cccc1N)C(=O)C</chem>     |                                                                                     |            |        |
| NSC_7639                           |  | 95-78-3    | 4.53   |
| <chem>c1(ccc(cc1N)C)C</chem>       |                                                                                     |            |        |
| NSC_7640                           |  | 95-68-1    | 4.89   |
| <chem>c1(cc(ccc1N)C)C</chem>       |                                                                                     |            |        |
| NSC_7660                           |  | 92-67-1    | 4.35   |
| <chem>c1ccccc1c1ccc(cc1)N</chem>   |                                                                                     |            |        |
| NSC_7661                           |  | 90-41-5    | 3.83   |
| <chem>c1ccc(c(c1)N)c1ccccc1</chem> |                                                                                     |            |        |

Table S1: List of molecules.

| NSC number                                         |                                                                                     | CAS number | $pK_a$ |
|----------------------------------------------------|-------------------------------------------------------------------------------------|------------|--------|
| smiles                                             |                                                                                     |            |        |
| NSC_7665                                           | 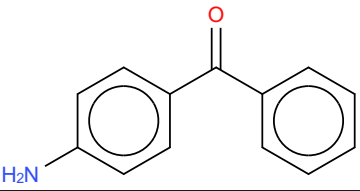   | 1137-41-3  | 2.24   |
| <chem>O=C(c1ccc(cc1)N)c1ccccc1</chem>              |                                                                                     |            |        |
| NSC_7731                                           |    | 119-32-4   | 3.03   |
| <chem>c1cc(cc(c1C)[N+](=O)[O-])N</chem>            |                                                                                     |            |        |
| NSC_7921                                           |    | 104-94-9   | 5.34   |
| <chem>c1cc(ccc1N)OC</chem>                         |                                                                                     |            |        |
| NSC_8731                                           |   | 97-02-9    | -4.25  |
| <chem>c1cc(cc(c1N)[N+](=O)[O-])[N+](=O)[O-]</chem> |                                                                                     |            |        |
| NSC_8947                                           |  | 99-55-8    | 2.35   |
| <chem>c1(cc(ccc1C)[N+](=O)[O-])N</chem>            |                                                                                     |            |        |
| NSC_9574                                           |  | 99-09-2    | 2.47   |
| <chem>c1(cc(ccc1)[N+](=O)[O-])N</chem>             |                                                                                     |            |        |
| NSC_9796                                           |  | 88-74-4    | -0.28  |
| <chem>c1(ccccc1N)[N+](=O)[O-]</chem>               |                                                                                     |            |        |

Table S1: List of molecules.

| NSC number                           |                                                                                     | CAS number | $pK_a$ |
|--------------------------------------|-------------------------------------------------------------------------------------|------------|--------|
| <b>smiles</b>                        |                                                                                     |            |        |
| NSC_9797                             | 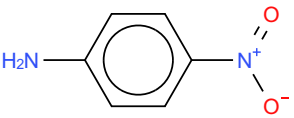   | 100-01-6   | 1      |
| <chem>c1cc(ccc1N)[N+](=O)[O-]</chem> |                                                                                     |            |        |
| NSC_9818                             |    | 94-70-2    | 4.43   |
| <chem>c1c(c(ccc1N)OCC</chem>         |                                                                                     |            |        |
| NSC_10299                            |    | 348-54-9   | 3.2    |
| <chem>Fc1ccccc1N</chem>              |                                                                                     |            |        |
| NSC_10300                            |   | 372-19-0   | 3.5    |
| <chem>Fc1cc(ccc1)N</chem>            |                                                                                     |            |        |
| NSC_10337                            |  | 455-14-1   | 2.45   |
| <chem>c1cc(ccc1N)C(F)(F)F</chem>     |                                                                                     |            |        |
| NSC_15348                            |  | 95-53-4    | 4.44   |
| <chem>c1(ccccc1N)C</chem>            |                                                                                     |            |        |
| NSC_15349                            |  | 108-44-1   | 4.69   |
| <chem>c1c(cccc1N)C</chem>            |                                                                                     |            |        |
| NSC_15350                            |  | 106-49-0   | 5.1    |
| <chem>c1cc(ccc1N)C</chem>            |                                                                                     |            |        |

Table S1: List of molecules.

| NSC number                                            |                                                                                     | CAS number | $pK_a$ |
|-------------------------------------------------------|-------------------------------------------------------------------------------------|------------|--------|
| <b>smiles</b>                                         |                                                                                     |            |        |
| NSC_17041                                             | 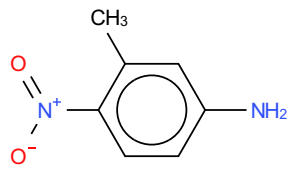   | 611-05-2   | 1.64   |
| <chem>c1c(ccc(c1C)[N+](=O)[O-])N</chem>               |                                                                                     |            |        |
| NSC_23516                                             |    | 94-12-2    | 2.49   |
| <chem>c1cc(ccc1C(=O)OCCC)N</chem>                     |                                                                                     |            |        |
| NSC_26880                                             |    | 108-69-0   | 4.79   |
| <chem>c1c(cc(cc1N)C)C</chem>                          |                                                                                     |            |        |
| NSC_36939                                             |  | 96-91-3    | 1      |
| <chem>c1(c(cc(cc1[N+](=O)[O-])[N+](=O)[O-])N)O</chem> |                                                                                     |            |        |
| NSC_62014                                             |  | 578-54-1   | 4.3    |
| <chem>c1(ccccc1N)CC</chem>                            |                                                                                     |            |        |
| NSC_62015                                             |  | 589-16-2   | 5      |
| <chem>c1cc(ccc1N)CC</chem>                            |                                                                                     |            |        |

Table S1: List of molecules.

| NSC number                                        |                                                                                     | CAS number | $pK_a$ |
|---------------------------------------------------|-------------------------------------------------------------------------------------|------------|--------|
| smiles                                            |                                                                                     |            |        |
| NSC_88320                                         | 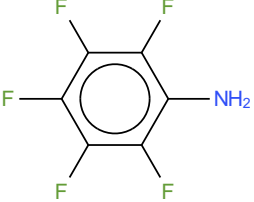   | 771-60-8   | -0.28  |
| <chem>Fc1c(F)c(c(F)c(F)c1F)N</chem>               |                                                                                     |            |        |
| NSC_93399                                         |    | 606-22-4   | -5     |
| <chem>c1(c(ccc1[N+](=O)[O-])[N+](=O)[O-])N</chem> |                                                                                     |            |        |
| NSC_97134                                         |   | 13171-61-4 | 2.36   |
| <chem>c1(c(c(c(c1C)[N+](=O)[O-])C)C)N)C</chem>    |                                                                                     |            |        |
| NSC_101580                                        |  | 16947-63-0 | 0.98   |
| <chem>c1(c(c(cc1)[N+](=O)[O-])C)N)C</chem>        |                                                                                     |            |        |
| NSC_128464                                        |  | 94-25-7    | 2.47   |
| <chem>O(C(=O)c1ccc(cc1)N)CCCC</chem>              |                                                                                     |            |        |

Table S1: List of molecules.

| NSC number                                           |                                                                                     | CAS number | $pK_a$ |
|------------------------------------------------------|-------------------------------------------------------------------------------------|------------|--------|
| smiles                                               |                                                                                     |            |        |
| <b>Test set of phenols</b>                           |                                                                                     |            |        |
| NSC_3                                                | 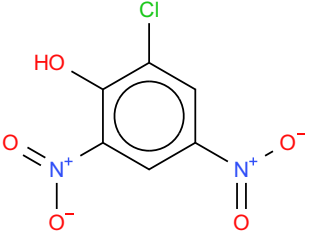   | 946-31-6   | 2.1    |
| <chem>Clc1cc(cc(c1O)[N+](=O)[O-])[N+](=O)[O-]</chem> |                                                                                     |            |        |
| NSC_1316                                             |    | 619-08-9   | 5.45   |
| <chem>Clc1cc(ccc1O)[N+](=O)[O-]</chem>               |                                                                                     |            |        |
| NSC_2136                                             |   | 118-79-6   | 6.8    |
| <chem>c1(cc(cc(c1O)Br)Br)Br</chem>                   |                                                                                     |            |        |
| NSC_2165                                             |  | 88-06-2    | 6.23   |
| <chem>Clc1cc(Cl)cc(Cl)c1O</chem>                     |                                                                                     |            |        |
| NSC_2428                                             |  | 58-90-2    | 5.22   |
| <chem>Clc1c(c(Cl)cc(Cl)c1Cl)O</chem>                 |                                                                                     |            |        |
| NSC_2851                                             |  | 1570-64-5  | 9.71   |
| <chem>c1(c(cc(cc1)Cl)C)O</chem>                      |                                                                                     |            |        |

Table S1: List of molecules.

| NSC number                              |                                                                                     | CAS number | $pK_a$ |
|-----------------------------------------|-------------------------------------------------------------------------------------|------------|--------|
| smiles                                  |                                                                                     |            |        |
| NSC_2870                                | 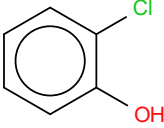   | 95-57-8    | 8.56   |
| <chem>Clc1ccccc1O</chem>                |                                                                                     |            |        |
| NSC_2877                                |    | 106-48-9   | 9.41   |
| <chem>Clc1ccc(cc1)O</chem>              |                                                                                     |            |        |
| NSC_2878                                |    | 87-64-9    | 8.69   |
| <chem>Clc1c(c(ccc1)C)O</chem>           |                                                                                     |            |        |
| NSC_2879                                |   | 120-83-2   | 7.89   |
| <chem>Clc1cc(Cl)ccc1O</chem>            |                                                                                     |            |        |
| NSC_3115                                |  | 65-45-2    | 8.37   |
| <chem>c1c(c(ccc1)O)C(=O)N</chem>        |                                                                                     |            |        |
| NSC_3142                                |  | 700-38-9   | 7.41   |
| <chem>c1cc(cc(c1[N+](=O)[O-])O)C</chem> |                                                                                     |            |        |
| NSC_3177                                |  | 1689-82-3  | 8.2    |
| <chem>c1cc(ccc1O)/N=N/c1ccccc1</chem>   |                                                                                     |            |        |
| NSC_3504                                |  | 100-83-4   | 8.98   |
| <chem>O=Cc1ccc(c1)O</chem>              |                                                                                     |            |        |



Table S1: List of molecules.

| NSC number                                 |                                                                                     | CAS number | $pK_a$ |
|--------------------------------------------|-------------------------------------------------------------------------------------|------------|--------|
| <b>smiles</b>                              |                                                                                     |            |        |
| NSC_3696                                   | 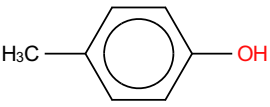   | 106-44-5   | 10.3   |
| <chem>c1c(ccc(c1)C)O</chem>                |                                                                                     |            |        |
| NSC_3698                                   |    | 99-93-4    | 8.05   |
| <chem>c1c(ccc(c1)C(=O)C)O</chem>           |                                                                                     |            |        |
| NSC_3814                                   |    | 90-01-7    | 9.84   |
| <chem>c1c(c(ccc1)CO)O</chem>               |                                                                                     |            |        |
| NSC_3815                                   |   | 90-05-1    | 9.98   |
| <chem>c1c(c(ccc1)O)OC</chem>               |                                                                                     |            |        |
| NSC_3829                                   |  | 105-67-9   | 10.6   |
| <chem>c1c(ccc(c1C)O)C</chem>               |                                                                                     |            |        |
| NSC_3991                                   |  | 103-90-2   | 9.38   |
| <chem>c1c(ccc(c1)O)NC(=O)C</chem>          |                                                                                     |            |        |
| NSC_4123                                   |  | 618-80-4   | 3.55   |
| <chem>Clc1cc(cc(Cl)c1O)[N+](=O)[O-]</chem> |                                                                                     |            |        |

Table S1: List of molecules.

| NSC number                                          |                                                                                     | CAS number | $pK_a$ |
|-----------------------------------------------------|-------------------------------------------------------------------------------------|------------|--------|
| smiles                                              |                                                                                     |            |        |
| NSC_4166                                            | 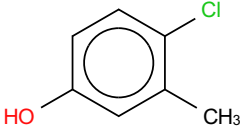   | 59-50-7    | 9.55   |
| <chem>Clc1c(cc(cc1)O)C</chem>                       |                                                                                     |            |        |
| NSC_4964                                            |    | 89-68-9    | 9.98   |
| <chem>Clc1cc(c(cc1C)O)C(C)C</chem>                  |                                                                                     |            |        |
| NSC_4970                                            |    | 106-41-2   | 9.17   |
| <chem>Br1ccc(cc1)O</chem>                           |                                                                                     |            |        |
| NSC_4971                                            |   | 88-04-0    | 9.7    |
| <chem>Clc1c(cc(cc1C)O)C</chem>                      |                                                                                     |            |        |
| NSC_5717                                            |  | 608-71-9   | 4.62   |
| <chem>Br1c(Br)c(c(Br)c(Br)c1Br)O</chem>             |                                                                                     |            |        |
| NSC_6212                                            |  | 88-87-9    | 2.96   |
| <chem>Clc1cc(c(c1)[N+](=O)[O-])O[N+](=O)[O-]</chem> |                                                                                     |            |        |
| NSC_6213                                            |  | 615-58-7   | 7.79   |
| <chem>Br1cc(Br)ccc1O</chem>                         |                                                                                     |            |        |

Table S1: List of molecules.

| NSC number                                            |                                                                                     | CAS number | $pK_a$ |
|-------------------------------------------------------|-------------------------------------------------------------------------------------|------------|--------|
| smiles                                                |                                                                                     |            |        |
| NSC_6214                                              | 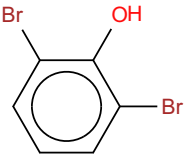   | 608-33-3   | 6.67   |
| <chem>Br1c(c(Br)ccc1)O</chem>                         |                                                                                     |            |        |
| NSC_6296                                              |    | 583-78-8   | 7.51   |
| <chem>Clc1c(cc(Cl)cc1)O</chem>                        |                                                                                     |            |        |
| NSC_6970                                              |    | 95-56-7    | 8.45   |
| <chem>Br1cccc1O</chem>                                |                                                                                     |            |        |
| NSC_22902                                             |   | 3679-63-8  | 7.3    |
| <chem>Clc1ccc(cc1)NC(=O)c1ccccc1O</chem>              |                                                                                     |            |        |
| NSC_28581                                             |  | 603-86-1   | 5.48   |
| <chem>Clc1c(c(ccc1)[N+](=O)[O-])O</chem>              |                                                                                     |            |        |
| NSC_33870                                             |  | 609-93-8   | 4.23   |
| <chem>c1(c(cc(cc1[N+](=O)[O-])C)[N+](=O)[O-])O</chem> |                                                                                     |            |        |
| NSC_36808                                             |  | 108-95-2   | 9.99   |
| <chem>c1ccccc1O</chem>                                |                                                                                     |            |        |

Table S1: List of molecules.

| NSC number                                                    |  | CAS number | $pK_a$ |
|---------------------------------------------------------------|--|------------|--------|
| <b>smiles</b>                                                 |  |            |        |
| NSC_36947                                                     |  | 88-89-1    | 0.38   |
| <chem>c1c(c(cc1[N+](=O)[O-])[N+](=O)[O-])O[N+](=O)[O-]</chem> |  |            |        |
| NSC_38776                                                     |  | 496-78-6   | 10.6   |
| <chem>c1c(c(cc1C)C)C)O</chem>                                 |  |            |        |
| NSC_48848                                                     |  | 6640-27-3  | 8.74   |
| <chem>Clc1cc(ccc1O)C</chem>                                   |  |            |        |
| NSC_59700                                                     |  | 108-43-0   | 9.12   |
| <chem>Clc1cc(ccc1)O</chem>                                    |  |            |        |
| NSC_60646                                                     |  | 576-24-9   | 7.7    |
| <chem>Clc1c(Cl)c(ccc1)O</chem>                                |  |            |        |
| NSC_60647                                                     |  | 87-65-0    | 6.79   |
| <chem>Clc1c(c(Cl)ccc1)O</chem>                                |  |            |        |
| NSC_60648                                                     |  | 95-77-2    | 8.63   |
| <chem>Clc1cc(ccc1Cl)O</chem>                                  |  |            |        |

Table S1: List of molecules.

| NSC number                               |                                                                                     | CAS number | $pK_a$ |
|------------------------------------------|-------------------------------------------------------------------------------------|------------|--------|
| <b>smiles</b>                            |                                                                                     |            |        |
| NSC_60649                                | 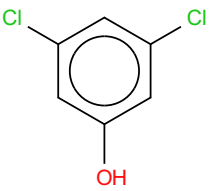   | 591-35-5   | 8.18   |
| <chem>Clc1cc(cc(Cl)c1)O</chem>           |                                                                                     |            |        |
| NSC_63709                                |    | 1697-18-3  | 7.31   |
| <chem>Clc1c(cccc1)NC(=O)c1ccccc1O</chem> |                                                                                     |            |        |
| NSC_74624                                |   | 3217-15-0  | 6.21   |
| <chem>Clc1cc(Br)cc(Cl)c1O</chem>         |                                                                                     |            |        |
| NSC_75840                                |  | 1073-72-9  | 9.53   |
| <chem>S(c1ccc(cc1)O)C</chem>             |                                                                                     |            |        |
| NSC_243667                               |  | 609-19-8   | 7.84   |
| <chem>c1(cc(Cl)c(c(c1)Cl)Cl)O</chem>     |                                                                                     |            |        |
| NSC_263497                               |  | 87-86-5    | 4.7    |
| <chem>Clc1c(c(c(c1Cl)Cl)Cl)Cl)O</chem>   |                                                                                     |            |        |

Table S1: List of molecules.

| NSC number                                 |                                                                                     | CAS number | $pK_a$ |
|--------------------------------------------|-------------------------------------------------------------------------------------|------------|--------|
| smiles                                     |                                                                                     |            |        |
| NSC_402600                                 | 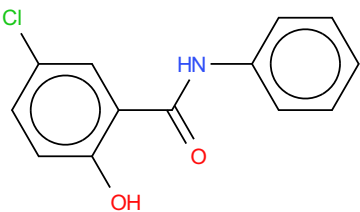   | 4638-48-6  | 6.17   |
| <chem>Clc1cc(c(cc1)O)C(=O)Nc1ccccc1</chem> |                                                                                     |            |        |
| NSC_407750                                 |    | 2432-12-4  | 7.19   |
| <chem>c1(cc(cc(c1O)Cl)C)Cl</chem>          |                                                                                     |            |        |
| NSC_407823                                 |   | 935-95-5   | 5.14   |
| <chem>Clc1c(c(Cl)c(Cl)cc1Cl)O</chem>       |                                                                                     |            |        |
| NSC_520345                                 |  | 89-64-5    | 6.46   |
| <chem>Clc1cc(c(cc1)O)[N+](=O)[O-]</chem>   |                                                                                     |            |        |
| NSC_526279                                 |  | 2627-77-2  | 7.31   |
| <chem>Br1ccc(cc1)NC(=O)c1ccccc1O</chem>    |                                                                                     |            |        |

## 2 Summary of Correlations Between Calculated and Experimental $pK_a$ for PM6 Models

Table S2:  $R^2$  describing the correlation between calculated and experimental  $pK_a$  for semiempirical QSPR models.

| $R^2$                 |                | Class of molecules          | Phenols  | Carboxylic acids | Anilines       | Average          |                  |
|-----------------------|----------------|-----------------------------|----------|------------------|----------------|------------------|------------------|
|                       |                | Charge calculation approach | PM6, MPA | PM6, MPA         | PM6, MPA       |                  |                  |
| Source + Optimization | Balloon        | none                        | 0.900    | 0.854            | 0.896          | 0.884            |                  |
|                       |                | MM                          | 0.889    | 0.877            | 0.935          | 0.900            |                  |
|                       |                | QM                          | 0.886    | 0.895            | 0.933          | 0.904            |                  |
|                       | Frog2          | none                        | 0.939    | 0.886            | 0.919          | 0.914            |                  |
|                       |                | MM                          | 0.942    | 0.931            | 0.961          | 0.945            |                  |
|                       |                | QM                          | 0.959    | 0.927            | 0.890          | 0.926            |                  |
|                       | NCI            | none                        | 0.950    | 0.941            | 0.966          | 0.952            |                  |
|                       |                | MM                          | 0.962    | 0.936            | 0.956          | 0.951            |                  |
|                       |                | QM                          | 0.878    | 0.932            | 0.940          | 0.917            |                  |
|                       | OpenBabel      | none                        | 0.949    | 0.919            | 0.964          | 0.944            |                  |
|                       |                | MM                          | 0.959    | 0.920            | 0.957          | 0.945            |                  |
|                       |                | QM                          | 0.952    | 0.901            | 0.887          | 0.913            |                  |
|                       | PubChem        | none                        | 0.934    | 0.933            | 0.952          | 0.940            |                  |
|                       |                | MM                          | 0.915    | 0.926            | 0.955          | 0.932            |                  |
|                       |                | QM                          | 0.929    | 0.919            | 0.884          | 0.911            |                  |
|                       | RDKit          | none                        | 0.868    | 0.839            | 0.883          | 0.863            |                  |
|                       |                | MM-UFF                      | 0.952    | 0.895            | 0.970          | 0.939            |                  |
|                       |                | MM                          | 0.931    | 0.863            | 0.957          | 0.917            |                  |
|                       |                | QM                          | 0.940    | 0.838            | 0.930          | 0.903            |                  |
|                       | <b>Average</b> |                             |          | 0.928            | 0.902          | 0.933            |                  |
|                       | Legend         |                             |          | $R^2 \geq 0.95$  | $R^2 \geq 0.9$ | $R^2 \geq 0.866$ | $R^2 \geq 0.833$ |

### 3 Quality and Statistical Criteria of All the QSPR Models

Table S3a: Quality and statistical criteria of QM and EEM QSPR models.

| Charges        | Theory level | Basis set | Charge scheme | 3D source | Opt | $R^2$ | RMSE  | $\Delta$ | $s$   | $F$   | # molecules |
|----------------|--------------|-----------|---------------|-----------|-----|-------|-------|----------|-------|-------|-------------|
| <b>Phenols</b> |              |           |               |           |     |       |       |          |       |       |             |
| QM             | B3LYP        | 6-31G*    | AIM           | NCI       | NO  | 0.973 | 0.341 | 0.256    | 0.359 | 391.9 | 60          |
| QM             | B3LYP        | 6-31G*    | MPA           | NCI       | NO  | 0.971 | 0.353 | 0.285    | 0.372 | 363.2 | 60          |
| QM             | HF           | STO-3G    | MPA           | FROG2     | QM  | 0.969 | 0.366 | 0.269    | 0.386 | 337.7 | 60          |
| QM             | HF           | STO-3G    | MPA           | FROG2     | MM  | 0.967 | 0.377 | 0.294    | 0.397 | 317.6 | 60          |
| QM             | B3LYP        | 6-31G*    | MPA           | OPENBABEL | MM  | 0.965 | 0.389 | 0.268    | 0.410 | 297.3 | 60          |
| QM             | B3LYP        | 6-31G*    | MPA           | FROG2     | QM  | 0.963 | 0.400 | 0.312    | 0.422 | 281.0 | 60          |
| QM             | HF           | STO-3G    | MPA           | PUBCHEM   | MM  | 0.963 | 0.402 | 0.307    | 0.423 | 278.6 | 60          |
| QM             | B3LYP        | 6-31G*    | MPA           | NCI       | MM  | 0.963 | 0.402 | 0.287    | 0.424 | 277.5 | 60          |
| QM             | B3LYP        | 6-31G*    | AIM           | OPENBABEL | NO  | 0.963 | 0.403 | 0.320    | 0.424 | 277.3 | 60          |
| QM             | B3LYP        | 6-31G*    | AIM           | OPENBABEL | MM  | 0.961 | 0.409 | 0.324    | 0.431 | 268.3 | 60          |
| QM             | B3LYP        | 6-31G*    | MPA           | RDKit     | MM  | 0.961 | 0.411 | 0.304    | 0.433 | 266.2 | 60          |
| QM             | B3LYP        | 6-31G*    | MPA           | OPENBABEL | NO  | 0.961 | 0.412 | 0.308    | 0.434 | 264.1 | 60          |
| QM             | HF           | STO-3G    | MPA           | OPENBABEL | MM  | 0.961 | 0.413 | 0.310    | 0.435 | 263.1 | 60          |
| QM             | B3LYP        | 6-31G*    | NPA           | NCI       | NO  | 0.960 | 0.415 | 0.333    | 0.437 | 260.7 | 60          |
| QM             | HF           | STO-3G    | MPA           | PUBCHEM   | NO  | 0.960 | 0.417 | 0.317    | 0.440 | 257.3 | 60          |
| QM             | B3LYP        | 6-31G*    | NPA           | NCI       | MM  | 0.959 | 0.419 | 0.332    | 0.442 | 255.0 | 60          |
| QM             | B3LYP        | 6-31G*    | NPA           | OPENBABEL | MM  | 0.959 | 0.420 | 0.329    | 0.443 | 253.7 | 60          |
| QM             | HF           | STO-3G    | MPA           | NCI       | MM  | 0.958 | 0.427 | 0.323    | 0.450 | 245.2 | 60          |
| QM             | B3LYP        | 6-31G*    | NPA           | OPENBABEL | NO  | 0.957 | 0.430 | 0.335    | 0.454 | 241.1 | 60          |
| QM             | B3LYP        | 6-31G*    | MPA           | OPENBABEL | QM  | 0.957 | 0.432 | 0.319    | 0.455 | 239.7 | 60          |
| QM             | B3LYP        | 6-31G*    | NPA           | OPENBABEL | QM  | 0.956 | 0.436 | 0.348    | 0.459 | 235.1 | 60          |
| QM             | HF           | STO-3G    | MPA           | OPENBABEL | QM  | 0.955 | 0.442 | 0.317    | 0.466 | 228.4 | 60          |
| QM             | HF           | STO-3G    | MPA           | OPENBABEL | NO  | 0.955 | 0.443 | 0.338    | 0.467 | 226.9 | 60          |
| QM             | B3LYP        | 6-31G*    | NPA           | FROG2     | QM  | 0.953 | 0.451 | 0.323    | 0.476 | 218.5 | 60          |
| QM             | B3LYP        | 6-31G*    | MPA           | PUBCHEM   | NO  | 0.950 | 0.466 | 0.320    | 0.491 | 204.1 | 60          |
| QM             | B3LYP        | 6-31G*    | AIM           | RDKit     | MM  | 0.950 | 0.467 | 0.374    | 0.492 | 203.5 | 60          |
| QM             | HF           | STO-3G    | MPA           | RDKit     | MM  | 0.947 | 0.478 | 0.354    | 0.504 | 193.5 | 60          |
| QM             | HF           | STO-3G    | MPA           | NCI       | NO  | 0.947 | 0.480 | 0.354    | 0.506 | 192.2 | 60          |
| QM             | B3LYP        | 6-31G*    | MPA           | RDKit     | QM  | 0.944 | 0.492 | 0.369    | 0.519 | 181.8 | 60          |
| QM             | HF           | STO-3G    | MPA           | PUBCHEM   | QM  | 0.943 | 0.494 | 0.359    | 0.521 | 180.2 | 60          |
| QM             | B3LYP        | 6-31G*    | NPA           | RDKit     | MM  | 0.941 | 0.504 | 0.412    | 0.531 | 173.4 | 60          |
| QM             | B3LYP        | 6-31G*    | AIM           | FROG2     | QM  | 0.939 | 0.514 | 0.372    | 0.542 | 165.9 | 60          |
| QM             | B3LYP        | 6-31G*    | MPA           | BALLOON   | NO  | 0.939 | 0.514 | 0.367    | 0.542 | 165.8 | 60          |
| QM             | B3LYP        | 6-31G*    | AIM           | FROG2     | MM  | 0.938 | 0.518 | 0.386    | 0.546 | 163.3 | 60          |
| QM             | B3LYP        | 6-31G*    | MPA           | PUBCHEM   | QM  | 0.936 | 0.525 | 0.380    | 0.553 | 158.8 | 60          |
| QM             | B3LYP        | 6-31G*    | AIM           | OPENBABEL | QM  | 0.936 | 0.525 | 0.400    | 0.554 | 158.4 | 60          |
| QM             | B3LYP        | 6-31G*    | AIM           | NCI       | MM  | 0.936 | 0.527 | 0.389    | 0.556 | 157.3 | 60          |
| QM             | HF           | STO-3G    | MPA           | RDKit     | QM  | 0.935 | 0.529 | 0.376    | 0.557 | 156.2 | 60          |
| QM             | B3LYP        | 6-31G*    | NPA           | PUBCHEM   | NO  | 0.935 | 0.529 | 0.401    | 0.558 | 156.0 | 60          |



Table S3a: Quality and statistical criteria of QM and EEM QSPR models.

| Charges        | Theory level | Basis set | Charge scheme | 3D source | Opt | $R^2$ | RMSE  | $\Delta$ | $s$   | $F$   | # molecules |
|----------------|--------------|-----------|---------------|-----------|-----|-------|-------|----------|-------|-------|-------------|
| QM             | B3LYP        | 6-31G*    | MPA           | NCI       | QM  | 0.935 | 0.531 | 0.390    | 0.560 | 154.6 | 60          |
| QM             | B3LYP        | 6-31G*    | NPA           | RDKit     | MM  | 0.934 | 0.532 | 0.408    | 0.561 | 154.0 | 60          |
| QM             | B3LYP        | 6-31G*    | AIM           | RDKit     | MM  | 0.934 | 0.534 | 0.407    | 0.563 | 152.8 | 60          |
| QM             | B3LYP        | 6-31G*    | NPA           | BALLOON   | MM  | 0.933 | 0.536 | 0.422    | 0.565 | 151.5 | 60          |
| QM             | B3LYP        | 6-31G*    | NPA           | RDKit     | QM  | 0.933 | 0.539 | 0.423    | 0.569 | 149.7 | 60          |
| QM             | B3LYP        | 6-31G*    | MPA           | FROG2     | MM  | 0.931 | 0.545 | 0.408    | 0.575 | 146.1 | 60          |
| QM             | HF           | STO-3G    | MPA           | RDKit     | MM  | 0.931 | 0.548 | 0.406    | 0.577 | 144.8 | 60          |
| QM             | B3LYP        | 6-31G*    | NPA           | PUBCHEM   | MM  | 0.927 | 0.561 | 0.437    | 0.592 | 137.4 | 60          |
| Chavez2006     | B3LYP        | 6-31G*    | MPA           | NCI       | MM  | 0.926 | 0.565 | 0.436    | 0.595 | 135.6 | 60          |
| Bult2002-npa   | B3LYP        | 6-31G*    | NPA           | NCI       | MM  | 0.926 | 0.566 | 0.441    | 0.596 | 135.2 | 60          |
| Bult2002-npa   | B3LYP        | 6-31G*    | NPA           | PUBCHEM   | QM  | 0.925 | 0.570 | 0.444    | 0.601 | 132.9 | 60          |
| Bult2002-npa   | B3LYP        | 6-31G*    | NPA           | NCI       | QM  | 0.925 | 0.571 | 0.440    | 0.601 | 132.7 | 60          |
| Chavez2006     | B3LYP        | 6-31G*    | MPA           | NCI       | QM  | 0.924 | 0.572 | 0.443    | 0.603 | 131.7 | 60          |
| Svob2007-chal2 | HF           | STO-3G    | MPA           | RDKit     | MM  | 0.923 | 0.579 | 0.422    | 0.610 | 128.6 | 60          |
| QM             | B3LYP        | 6-31G*    | AIM           | RDKit     | QM  | 0.922 | 0.579 | 0.427    | 0.610 | 128.4 | 60          |
| QM             | B3LYP        | 6-31G*    | NPA           | PUBCHEM   | QM  | 0.922 | 0.579 | 0.418    | 0.611 | 128.4 | 60          |
| Chavez2006     | B3LYP        | 6-31G*    | MPA           | PUBCHEM   | QM  | 0.921 | 0.585 | 0.454    | 0.616 | 125.9 | 60          |
| Svob2007-chal2 | HF           | STO-3G    | MPA           | FROG2     | QM  | 0.921 | 0.585 | 0.418    | 0.616 | 125.8 | 60          |
| Chavez2006     | B3LYP        | 6-31G*    | MPA           | OPENBABEL | NO  | 0.920 | 0.588 | 0.468    | 0.620 | 124.1 | 60          |
| Chavez2006     | B3LYP        | 6-31G*    | MPA           | OPENBABEL | MM  | 0.919 | 0.591 | 0.467    | 0.623 | 122.9 | 60          |
| Chavez2006     | B3LYP        | 6-31G*    | MPA           | RDKit     | QM  | 0.919 | 0.593 | 0.470    | 0.625 | 121.9 | 60          |
| Chavez2006     | B3LYP        | 6-31G*    | MPA           | PUBCHEM   | NO  | 0.918 | 0.594 | 0.457    | 0.626 | 121.6 | 60          |
| Svob2007-chal2 | HF           | STO-3G    | MPA           | FROG2     | MM  | 0.918 | 0.594 | 0.437    | 0.626 | 121.5 | 60          |
| Bult2002-npa   | B3LYP        | 6-31G*    | NPA           | FROG2     | QM  | 0.918 | 0.596 | 0.472    | 0.629 | 120.5 | 60          |
| Bult2002-npa   | B3LYP        | 6-31G*    | NPA           | FROG2     | MM  | 0.917 | 0.598 | 0.476    | 0.630 | 119.8 | 60          |
| Chavez2006     | B3LYP        | 6-31G*    | MPA           | PUBCHEM   | MM  | 0.917 | 0.599 | 0.467    | 0.631 | 119.5 | 60          |
| Chavez2006     | B3LYP        | 6-31G*    | MPA           | OPENBABEL | QM  | 0.917 | 0.599 | 0.476    | 0.631 | 119.5 | 60          |
| QM             | HF           | STO-3G    | MPA           | BALLOON   | MM  | 0.917 | 0.599 | 0.434    | 0.631 | 119.5 | 60          |
| Chavez2006     | B3LYP        | 6-31G*    | MPA           | RDKit     | MM  | 0.917 | 0.599 | 0.470    | 0.631 | 119.5 | 60          |
| Bult2002-npa   | B3LYP        | 6-31G*    | NPA           | RDKit     | QM  | 0.916 | 0.603 | 0.472    | 0.635 | 117.8 | 60          |
| Bult2004-aim   | B3LYP        | 6-31G*    | AIM           | NCI       | MM  | 0.916 | 0.603 | 0.474    | 0.636 | 117.6 | 60          |
| QM             | HF           | STO-3G    | MPA           | BALLOON   | QM  | 0.915 | 0.607 | 0.436    | 0.639 | 116.1 | 60          |
| Bult2002-npa   | B3LYP        | 6-31G*    | NPA           | PUBCHEM   | MM  | 0.915 | 0.607 | 0.471    | 0.640 | 115.9 | 60          |
| Bult2002-npa   | B3LYP        | 6-31G*    | NPA           | PUBCHEM   | NO  | 0.913 | 0.615 | 0.477    | 0.648 | 112.7 | 60          |
| QM             | B3LYP        | 6-31G*    | MPA           | FROG2     | NO  | 0.912 | 0.615 | 0.483    | 0.648 | 112.6 | 60          |
| Bult2002-npa   | B3LYP        | 6-31G*    | NPA           | RDKit     | MM  | 0.912 | 0.615 | 0.480    | 0.649 | 112.5 | 60          |
| Bult2002-npa   | B3LYP        | 6-31G*    | NPA           | OPENBABEL | NO  | 0.912 | 0.617 | 0.483    | 0.650 | 112.0 | 60          |
| Bult2004-aim   | B3LYP        | 6-31G*    | AIM           | NCI       | QM  | 0.912 | 0.617 | 0.484    | 0.651 | 111.8 | 60          |
| Bult2002-npa   | B3LYP        | 6-31G*    | NPA           | OPENBABEL | MM  | 0.911 | 0.619 | 0.484    | 0.653 | 110.9 | 60          |
| Bult2002-npa   | B3LYP        | 6-31G*    | NPA           | OPENBABEL | QM  | 0.911 | 0.621 | 0.487    | 0.654 | 110.4 | 60          |
| QM             | B3LYP        | 6-31G*    | MPA           | PUBCHEM   | MM  | 0.911 | 0.622 | 0.437    | 0.655 | 110.0 | 60          |
| QM             | B3LYP        | 6-31G*    | MPA           | RDKit     | MM  | 0.909 | 0.626 | 0.423    | 0.660 | 108.4 | 60          |
| Svob2007-chal2 | HF           | STO-3G    | MPA           | RDKit     | QM  | 0.909 | 0.628 | 0.447    | 0.662 | 107.6 | 60          |
| Chavez2006     | B3LYP        | 6-31G*    | MPA           | RDKit     | MM  | 0.908 | 0.629 | 0.481    | 0.663 | 107.2 | 60          |

Table S3a: Quality and statistical criteria of QM and EEM QSPR models.

| Charges        | Theory level | Basis set | Charge scheme | 3D source | Opt | $R^2$ | RMSE  | $\Delta$ | $s$   | $F$   | # molecules |
|----------------|--------------|-----------|---------------|-----------|-----|-------|-------|----------|-------|-------|-------------|
| Chavez2006     | B3LYP        | 6-31G*    | MPA           | BALLOON   | QM  | 0.908 | 0.631 | 0.486    | 0.665 | 106.5 | 60          |
| Bult2004-aim   | B3LYP        | 6-31G*    | AIM           | OPENBABEL | NO  | 0.908 | 0.631 | 0.499    | 0.665 | 106.5 | 60          |
| QM             | B3LYP        | 6-31G*    | NPA           | BALLOON   | NO  | 0.908 | 0.631 | 0.473    | 0.665 | 106.5 | 60          |
| Svob2007-chal2 | HF           | STO-3G    | MPA           | FROG2     | NO  | 0.907 | 0.634 | 0.470    | 0.668 | 105.4 | 60          |
| Bult2004-aim   | B3LYP        | 6-31G*    | AIM           | OPENBABEL | MM  | 0.907 | 0.634 | 0.498    | 0.668 | 105.4 | 60          |
| Bult2002-mpa   | B3LYP        | 6-31G*    | NPA           | BALLOON   | MM  | 0.907 | 0.634 | 0.498    | 0.668 | 105.4 | 60          |
| QM             | B3LYP        | 6-31G*    | NPA           | FROG2     | MM  | 0.907 | 0.635 | 0.453    | 0.669 | 105.2 | 60          |
| Chavez2006     | B3LYP        | 6-31G*    | MPA           | RDKit     | NO  | 0.907 | 0.635 | 0.500    | 0.669 | 105.0 | 60          |
| Chavez2006     | B3LYP        | 6-31G*    | MPA           | FROG2     | QM  | 0.907 | 0.635 | 0.500    | 0.669 | 105.0 | 60          |
| Chavez2006     | B3LYP        | 6-31G*    | MPA           | BALLOON   | MM  | 0.906 | 0.636 | 0.492    | 0.670 | 104.7 | 60          |
| Chavez2006     | B3LYP        | 6-31G*    | MPA           | FROG2     | MM  | 0.906 | 0.637 | 0.506    | 0.671 | 104.4 | 60          |
| QM             | B3LYP        | 6-31G*    | NPA           | FROG2     | NO  | 0.906 | 0.638 | 0.479    | 0.673 | 103.8 | 60          |
| Svob2007-chal2 | HF           | STO-3G    | MPA           | NCI       | NO  | 0.906 | 0.639 | 0.478    | 0.673 | 103.6 | 60          |
| Bult2002-mpa   | B3LYP        | 6-31G*    | NPA           | BALLOON   | QM  | 0.906 | 0.639 | 0.502    | 0.674 | 103.5 | 60          |
| Chavez2006     | B3LYP        | 6-31G*    | MPA           | NCI       | NO  | 0.906 | 0.639 | 0.503    | 0.674 | 103.5 | 60          |
| Chavez2006     | B3LYP        | 6-31G*    | MPA           | BALLOON   | NO  | 0.904 | 0.643 | 0.503    | 0.678 | 102.0 | 60          |
| Bult2002-mpa   | B3LYP        | 6-31G*    | NPA           | RDKit     | NO  | 0.904 | 0.644 | 0.508    | 0.679 | 101.9 | 60          |
| Bult2004-aim   | B3LYP        | 6-31G*    | AIM           | OPENBABEL | QM  | 0.904 | 0.645 | 0.507    | 0.680 | 101.4 | 60          |
| QM             | B3LYP        | 6-31G*    | AIM           | BALLOON   | NO  | 0.904 | 0.645 | 0.427    | 0.680 | 101.3 | 60          |
| Bult2002-mpa   | B3LYP        | 6-31G*    | NPA           | BALLOON   | NO  | 0.903 | 0.649 | 0.507    | 0.684 | 100.1 | 60          |
| QM             | B3LYP        | 6-31G*    | AIM           | NCI       | QM  | 0.902 | 0.651 | 0.512    | 0.686 | 99.5  | 60          |
| Bult2002-mpa   | B3LYP        | 6-31G*    | NPA           | RDKit     | MM  | 0.902 | 0.652 | 0.502    | 0.687 | 99.1  | 60          |
| Bult2004-aim   | B3LYP        | 6-31G*    | AIM           | PUBCHEM   | NO  | 0.902 | 0.653 | 0.511    | 0.688 | 98.8  | 60          |
| QM             | B3LYP        | 6-31G*    | NPA           | BALLOON   | QM  | 0.901 | 0.655 | 0.474    | 0.691 | 98.0  | 60          |
| QM             | B3LYP        | 6-31G*    | AIM           | PUBCHEM   | NO  | 0.900 | 0.657 | 0.448    | 0.693 | 97.4  | 60          |
| Svob2007-chal2 | HF           | STO-3G    | MPA           | OPENBABEL | MM  | 0.900 | 0.658 | 0.476    | 0.693 | 97.2  | 60          |
| Svob2007-chal2 | HF           | STO-3G    | MPA           | OPENBABEL | NO  | 0.900 | 0.658 | 0.477    | 0.694 | 97.0  | 60          |
| Bult2002-mpa   | B3LYP        | 6-31G*    | NPA           | NCI       | NO  | 0.899 | 0.661 | 0.506    | 0.697 | 96.1  | 60          |
| Svob2007-chal2 | HF           | STO-3G    | MPA           | RDKit     | MM  | 0.899 | 0.661 | 0.461    | 0.697 | 96.1  | 60          |
| Bult2004-aim   | B3LYP        | 6-31G*    | AIM           | PUBCHEM   | QM  | 0.899 | 0.661 | 0.526    | 0.697 | 96.1  | 60          |
| Bult2004-aim   | B3LYP        | 6-31G*    | AIM           | PUBCHEM   | MM  | 0.899 | 0.661 | 0.519    | 0.697 | 96.0  | 60          |
| Svob2007-chal2 | HF           | STO-3G    | MPA           | PUBCHEM   | QM  | 0.898 | 0.664 | 0.476    | 0.700 | 95.1  | 60          |
| Bult2002-mpa   | B3LYP        | 6-31G*    | NPA           | FROG2     | NO  | 0.898 | 0.665 | 0.540    | 0.701 | 94.9  | 60          |
| Chavez2006     | B3LYP        | 6-31G*    | MPA           | FROG2     | NO  | 0.897 | 0.667 | 0.542    | 0.703 | 94.1  | 60          |
| Svob2007-chal2 | HF           | STO-3G    | MPA           | OPENBABEL | QM  | 0.896 | 0.670 | 0.481    | 0.707 | 93.1  | 60          |
| QM             | HF           | STO-3G    | MPA           | BALLOON   | NO  | 0.896 | 0.671 | 0.507    | 0.707 | 92.9  | 60          |
| Svob2007-chal2 | HF           | STO-3G    | MPA           | PUBCHEM   | NO  | 0.896 | 0.672 | 0.473    | 0.708 | 92.7  | 60          |
| Svob2007-chal2 | HF           | STO-3G    | MPA           | NCI       | QM  | 0.896 | 0.672 | 0.468    | 0.708 | 92.6  | 60          |
| Bult2004-aim   | B3LYP        | 6-31G*    | AIM           | RDKit     | QM  | 0.895 | 0.672 | 0.527    | 0.709 | 92.5  | 60          |
| QM             | B3LYP        | 6-31G*    | MPA           | RDKit     | NO  | 0.895 | 0.674 | 0.530    | 0.710 | 92.0  | 60          |
| Bult2004-aim   | B3LYP        | 6-31G*    | AIM           | RDKit     | MM  | 0.895 | 0.674 | 0.528    | 0.711 | 91.9  | 60          |
| QM             | HF           | STO-3G    | MPA           | FROG2     | NO  | 0.894 | 0.676 | 0.487    | 0.712 | 91.4  | 60          |
| Svob2007-chal2 | HF           | STO-3G    | MPA           | RDKit     | NO  | 0.894 | 0.677 | 0.504    | 0.713 | 91.1  | 60          |
| Bult2004-aim   | B3LYP        | 6-31G*    | AIM           | RDKit     | MM  | 0.892 | 0.683 | 0.524    | 0.720 | 89.3  | 60          |

Table S3a: Quality and statistical criteria of QM and EEM QSPR models.

| Charges        | Theory level | Basis set | Charge scheme | 3D source | Opt | $R^2$ | RMSE  | $\Delta$ | $s$   | $F$  | # molecules |
|----------------|--------------|-----------|---------------|-----------|-----|-------|-------|----------|-------|------|-------------|
| QM             | B3LYP        | 6-31G*    | AIM           | BALLOON   | MM  | 0.891 | 0.686 | 0.476    | 0.723 | 88.3 | 60          |
| QM             | HF           | STO-3G    | MPA           | NCI       | QM  | 0.891 | 0.686 | 0.557    | 0.724 | 88.3 | 60          |
| Svob2007-chal2 | HF           | STO-3G    | MPA           | NCI       | MM  | 0.891 | 0.688 | 0.473    | 0.725 | 87.9 | 60          |
| QM             | B3LYP        | 6-31G*    | AIM           | FROG2     | NO  | 0.891 | 0.688 | 0.534    | 0.725 | 87.8 | 60          |
| Bult2004-aim   | B3LYP        | 6-31G*    | AIM           | BALLOON   | QM  | 0.890 | 0.691 | 0.550    | 0.728 | 87.1 | 60          |
| Bult2004-aim   | B3LYP        | 6-31G*    | AIM           | NCI       | NO  | 0.890 | 0.691 | 0.546    | 0.728 | 87.0 | 60          |
| Bult2004-aim   | B3LYP        | 6-31G*    | AIM           | BALLOON   | NO  | 0.888 | 0.695 | 0.553    | 0.733 | 85.8 | 60          |
| Svob2007-chal2 | HF           | STO-3G    | MPA           | PUBCHEM   | MM  | 0.887 | 0.698 | 0.513    | 0.736 | 85.0 | 60          |
| QM             | B3LYP        | 6-31G*    | AIM           | PUBCHEM   | QM  | 0.886 | 0.701 | 0.452    | 0.739 | 84.3 | 60          |
| Bult2004-aim   | B3LYP        | 6-31G*    | AIM           | RDKit     | NO  | 0.885 | 0.704 | 0.552    | 0.742 | 83.4 | 60          |
| Bult2004-aim   | B3LYP        | 6-31G*    | AIM           | BALLOON   | MM  | 0.885 | 0.705 | 0.542    | 0.743 | 83.1 | 60          |
| QM             | B3LYP        | 6-31G*    | AIM           | RDKit     | NO  | 0.882 | 0.716 | 0.558    | 0.754 | 80.4 | 60          |
| QM             | B3LYP        | 6-31G*    | MPA           | BALLOON   | MM  | 0.881 | 0.719 | 0.466    | 0.757 | 79.6 | 60          |
| Svob2007-chal2 | HF           | STO-3G    | MPA           | BALLOON   | NO  | 0.873 | 0.741 | 0.553    | 0.781 | 74.4 | 60          |
| QM             | B3LYP        | 6-31G*    | MPA           | BALLOON   | QM  | 0.871 | 0.745 | 0.489    | 0.786 | 73.2 | 60          |
| Svob2007-chal2 | HF           | STO-3G    | MPA           | BALLOON   | QM  | 0.869 | 0.752 | 0.556    | 0.792 | 71.8 | 60          |
| Bult2004-aim   | B3LYP        | 6-31G*    | AIM           | FROG2     | QM  | 0.869 | 0.754 | 0.590    | 0.794 | 71.4 | 60          |
| Bult2004-aim   | B3LYP        | 6-31G*    | AIM           | FROG2     | MM  | 0.868 | 0.756 | 0.587    | 0.797 | 70.9 | 60          |
| QM             | B3LYP        | 6-31G*    | AIM           | PUBCHEM   | MM  | 0.864 | 0.766 | 0.526    | 0.807 | 68.9 | 60          |
| QM             | B3LYP        | 6-31G*    | NPA           | NCI       | QM  | 0.861 | 0.776 | 0.651    | 0.818 | 66.8 | 60          |
| Bult2004-aim   | B3LYP        | 6-31G*    | AIM           | FROG2     | NO  | 0.858 | 0.785 | 0.625    | 0.827 | 65.0 | 60          |
| QM             | B3LYP        | 6-31G*    | AIM           | BALLOON   | QM  | 0.856 | 0.789 | 0.553    | 0.831 | 64.3 | 60          |
| Svob2007-chal2 | HF           | STO-3G    | MPA           | BALLOON   | MM  | 0.852 | 0.799 | 0.560    | 0.843 | 62.3 | 60          |
| QM             | B3LYP        | 6-31G*    | NPA           | RDKit     | NO  | 0.796 | 0.940 | 0.768    | 0.991 | 42.1 | 60          |
| QM             | HF           | STO-3G    | MPA           | RDKit     | NO  | 0.782 | 0.972 | 0.801    | 1.024 | 38.7 | 60          |

Table S3a: Quality and statistical criteria of QM and EEM QSPR models.

| Charges                 | Theory level | Basis set | Charge scheme | 3D source | Opt | $R^2$ | RMSE  | $\Delta$ | $s$   | $F$   | # molecules |
|-------------------------|--------------|-----------|---------------|-----------|-----|-------|-------|----------|-------|-------|-------------|
| <b>Carboxylic acids</b> |              |           |               |           |     |       |       |          |       |       |             |
| QM                      | HF           | STO-3G    | MPA           | NCI       | MM  | 0.938 | 0.224 | 0.168    | 0.236 | 159.0 | 82          |
| Chavez2006              | B3LYP        | 6-31G*    | MPA           | RDKit     | NO  | 0.932 | 0.235 | 0.185    | 0.247 | 144.1 | 82          |
| QM                      | HF           | STO-3G    | MPA           | NCI       | NO  | 0.931 | 0.236 | 0.171    | 0.249 | 142.2 | 82          |
| QM                      | B3LYP        | 6-31G*    | NPA           | NCI       | MM  | 0.929 | 0.240 | 0.173    | 0.252 | 137.9 | 82          |
| Chavez2006              | B3LYP        | 6-31G*    | MPA           | NCI       | NO  | 0.926 | 0.244 | 0.189    | 0.257 | 132.3 | 82          |
| QM                      | HF           | STO-3G    | MPA           | NCI       | QM  | 0.925 | 0.246 | 0.181    | 0.259 | 130.0 | 82          |
| Chavez2006              | B3LYP        | 6-31G*    | MPA           | BALLOON   | NO  | 0.924 | 0.248 | 0.199    | 0.261 | 128.3 | 82          |
| Chavez2006              | B3LYP        | 6-31G*    | MPA           | PUBCHEM   | QM  | 0.923 | 0.249 | 0.182    | 0.262 | 127.3 | 82          |
| Chavez2006              | B3LYP        | 6-31G*    | MPA           | NCI       | QM  | 0.923 | 0.249 | 0.198    | 0.262 | 127.1 | 82          |
| QM                      | B3LYP        | 6-31G*    | AIM           | FROG2     | MM  | 0.922 | 0.250 | 0.194    | 0.263 | 125.7 | 82          |
| QM                      | B3LYP        | 6-31G*    | AIM           | NCI       | MM  | 0.922 | 0.251 | 0.184    | 0.264 | 124.9 | 82          |
| QM                      | B3LYP        | 6-31G*    | AIM           | NCI       | QM  | 0.921 | 0.253 | 0.191    | 0.267 | 122.4 | 82          |
| Chavez2006              | B3LYP        | 6-31G*    | MPA           | NCI       | MM  | 0.920 | 0.254 | 0.197    | 0.267 | 121.5 | 82          |
| Chavez2006              | B3LYP        | 6-31G*    | MPA           | RDKit     | MM  | 0.919 | 0.256 | 0.198    | 0.269 | 120.0 | 82          |
| QM                      | B3LYP        | 6-31G*    | AIM           | FROG2     | QM  | 0.917 | 0.258 | 0.190    | 0.272 | 117.2 | 82          |
| Chavez2006              | B3LYP        | 6-31G*    | MPA           | BALLOON   | MM  | 0.917 | 0.259 | 0.211    | 0.272 | 117.0 | 82          |
| Chavez2006              | B3LYP        | 6-31G*    | MPA           | BALLOON   | QM  | 0.917 | 0.259 | 0.205    | 0.272 | 116.8 | 82          |
| QM                      | HF           | STO-3G    | MPA           | FROG2     | QM  | 0.917 | 0.259 | 0.186    | 0.272 | 116.7 | 82          |
| QM                      | HF           | STO-3G    | MPA           | PUBCHEM   | MM  | 0.916 | 0.260 | 0.186    | 0.274 | 115.3 | 82          |
| QM                      | B3LYP        | 6-31G*    | AIM           | PUBCHEM   | MM  | 0.916 | 0.261 | 0.189    | 0.275 | 114.8 | 82          |
| Chavez2006              | B3LYP        | 6-31G*    | MPA           | RDKit     | QM  | 0.915 | 0.263 | 0.210    | 0.276 | 113.1 | 82          |
| Chavez2006              | B3LYP        | 6-31G*    | MPA           | OPENBABEL | QM  | 0.911 | 0.268 | 0.206    | 0.282 | 108.3 | 82          |
| QM                      | B3LYP        | 6-31G*    | NPA           | NCI       | NO  | 0.911 | 0.268 | 0.191    | 0.283 | 107.8 | 82          |
| QM                      | B3LYP        | 6-31G*    | AIM           | NCI       | NO  | 0.910 | 0.270 | 0.200    | 0.284 | 106.5 | 82          |
| QM                      | HF           | STO-3G    | MPA           | PUBCHEM   | NO  | 0.909 | 0.271 | 0.186    | 0.285 | 105.6 | 82          |
| QM                      | B3LYP        | 6-31G*    | AIM           | PUBCHEM   | QM  | 0.908 | 0.272 | 0.203    | 0.286 | 104.9 | 82          |
| Chavez2006              | B3LYP        | 6-31G*    | MPA           | RDKit     | MM  | 0.907 | 0.273 | 0.210    | 0.288 | 103.5 | 82          |
| QM                      | HF           | STO-3G    | MPA           | FROG2     | MM  | 0.907 | 0.273 | 0.195    | 0.288 | 103.4 | 82          |
| QM                      | B3LYP        | 6-31G*    | AIM           | PUBCHEM   | NO  | 0.907 | 0.274 | 0.197    | 0.288 | 103.4 | 82          |
| QM                      | B3LYP        | 6-31G*    | NPA           | FROG2     | QM  | 0.906 | 0.276 | 0.202    | 0.290 | 101.6 | 82          |
| QM                      | B3LYP        | 6-31G*    | NPA           | NCI       | QM  | 0.903 | 0.280 | 0.201    | 0.294 | 98.6  | 82          |
| Chavez2006              | B3LYP        | 6-31G*    | MPA           | OPENBABEL | MM  | 0.903 | 0.280 | 0.217    | 0.295 | 98.0  | 82          |
| QM                      | B3LYP        | 6-31G*    | NPA           | FROG2     | MM  | 0.903 | 0.280 | 0.201    | 0.295 | 98.0  | 82          |
| Chavez2006              | B3LYP        | 6-31G*    | MPA           | PUBCHEM   | MM  | 0.902 | 0.281 | 0.192    | 0.296 | 97.4  | 82          |
| QM                      | HF           | STO-3G    | MPA           | RDKit     | MM  | 0.902 | 0.282 | 0.216    | 0.296 | 97.0  | 82          |
| QM                      | HF           | STO-3G    | MPA           | PUBCHEM   | QM  | 0.901 | 0.282 | 0.194    | 0.297 | 96.6  | 82          |
| Chavez2006              | B3LYP        | 6-31G*    | MPA           | FROG2     | QM  | 0.898 | 0.287 | 0.199    | 0.302 | 93.0  | 82          |
| Chavez2006              | B3LYP        | 6-31G*    | MPA           | OPENBABEL | NO  | 0.898 | 0.288 | 0.225    | 0.303 | 92.6  | 82          |
| QM                      | B3LYP        | 6-31G*    | NPA           | PUBCHEM   | QM  | 0.896 | 0.290 | 0.204    | 0.305 | 90.9  | 82          |
| QM                      | HF           | STO-3G    | MPA           | FROG2     | NO  | 0.896 | 0.290 | 0.204    | 0.305 | 90.8  | 82          |
| QM                      | HF           | STO-3G    | MPA           | RDKit     | MM  | 0.894 | 0.292 | 0.213    | 0.308 | 89.4  | 82          |
| Bult2002-npa            | B3LYP        | 6-31G*    | NPA           | PUBCHEM   | QM  | 0.894 | 0.293 | 0.206    | 0.308 | 88.8  | 82          |

Table S3a: Quality and statistical criteria of QM and EEM QSPR models.

| Charges        | Theory level | Basis set | Charge scheme | 3D source | Opt | $R^2$ | RMSE  | $\Delta$ | $s$   | $F$  | # molecules |
|----------------|--------------|-----------|---------------|-----------|-----|-------|-------|----------|-------|------|-------------|
| QM             | B3LYP        | 6-31G*    | NPA           | PUBCHEM   | MM  | 0.892 | 0.295 | 0.210    | 0.310 | 87.7 | 82          |
| Bult2004-aim   | B3LYP        | 6-31G*    | AIM           | PUBCHEM   | QM  | 0.892 | 0.295 | 0.227    | 0.311 | 87.3 | 82          |
| QM             | B3LYP        | 6-31G*    | MPA           | NCI       | NO  | 0.891 | 0.296 | 0.203    | 0.311 | 86.8 | 82          |
| Chavez2006     | B3LYP        | 6-31G*    | MPA           | PUBCHEM   | NO  | 0.891 | 0.296 | 0.201    | 0.312 | 86.7 | 82          |
| Bult2002-npa   | B3LYP        | 6-31G*    | NPA           | NCI       | NO  | 0.891 | 0.297 | 0.231    | 0.313 | 86.1 | 82          |
| QM             | B3LYP        | 6-31G*    | NPA           | PUBCHEM   | NO  | 0.891 | 0.297 | 0.207    | 0.313 | 86.0 | 82          |
| QM             | HF           | STO-3G    | MPA           | BALLOON   | QM  | 0.890 | 0.297 | 0.232    | 0.313 | 85.9 | 82          |
| Bult2002-npa   | B3LYP        | 6-31G*    | NPA           | BALLOON   | QM  | 0.889 | 0.299 | 0.242    | 0.314 | 85.0 | 82          |
| QM             | B3LYP        | 6-31G*    | MPA           | NCI       | MM  | 0.889 | 0.300 | 0.220    | 0.315 | 84.5 | 82          |
| Bult2002-npa   | B3LYP        | 6-31G*    | NPA           | RDKit     | NO  | 0.889 | 0.300 | 0.227    | 0.315 | 84.5 | 82          |
| Chavez2006     | B3LYP        | 6-31G*    | MPA           | FROG2     | MM  | 0.888 | 0.300 | 0.207    | 0.316 | 83.9 | 82          |
| Svob2007-chal2 | HF           | STO-3G    | MPA           | PUBCHEM   | NO  | 0.888 | 0.300 | 0.233    | 0.316 | 83.9 | 82          |
| Bult2002-npa   | B3LYP        | 6-31G*    | NPA           | NCI       | MM  | 0.888 | 0.301 | 0.222    | 0.317 | 83.6 | 82          |
| Bult2002-npa   | B3LYP        | 6-31G*    | NPA           | BALLOON   | NO  | 0.888 | 0.301 | 0.244    | 0.317 | 83.6 | 82          |
| QM             | B3LYP        | 6-31G*    | MPA           | PUBCHEM   | MM  | 0.885 | 0.305 | 0.225    | 0.321 | 81.1 | 82          |
| Bult2002-npa   | B3LYP        | 6-31G*    | NPA           | NCI       | QM  | 0.884 | 0.306 | 0.234    | 0.322 | 80.4 | 82          |
| QM             | B3LYP        | 6-31G*    | AIM           | FROG2     | NO  | 0.884 | 0.307 | 0.220    | 0.324 | 79.2 | 81          |
| Bult2002-npa   | B3LYP        | 6-31G*    | NPA           | BALLOON   | MM  | 0.883 | 0.307 | 0.248    | 0.323 | 80.1 | 82          |
| Bult2002-npa   | B3LYP        | 6-31G*    | NPA           | RDKit     | QM  | 0.881 | 0.310 | 0.241    | 0.326 | 78.4 | 82          |
| Bult2004-aim   | B3LYP        | 6-31G*    | AIM           | NCI       | NO  | 0.879 | 0.313 | 0.259    | 0.329 | 76.5 | 82          |
| QM             | B3LYP        | 6-31G*    | MPA           | FROG2     | NO  | 0.876 | 0.316 | 0.232    | 0.333 | 74.8 | 82          |
| QM             | B3LYP        | 6-31G*    | NPA           | FROG2     | NO  | 0.876 | 0.316 | 0.241    | 0.333 | 74.8 | 82          |
| Bult2002-npa   | B3LYP        | 6-31G*    | NPA           | PUBCHEM   | MM  | 0.876 | 0.316 | 0.227    | 0.333 | 74.7 | 82          |
| QM             | B3LYP        | 6-31G*    | AIM           | OPENBABEL | NO  | 0.876 | 0.317 | 0.249    | 0.334 | 74.4 | 82          |
| Chavez2006     | B3LYP        | 6-31G*    | MPA           | FROG2     | NO  | 0.875 | 0.317 | 0.241    | 0.334 | 74.3 | 82          |
| Svob2007-chal2 | HF           | STO-3G    | MPA           | NCI       | NO  | 0.875 | 0.317 | 0.244    | 0.334 | 74.1 | 82          |
| QM             | B3LYP        | 6-31G*    | AIM           | OPENBABEL | MM  | 0.875 | 0.318 | 0.249    | 0.335 | 73.8 | 82          |
| Bult2004-aim   | B3LYP        | 6-31G*    | AIM           | FROG2     | QM  | 0.874 | 0.319 | 0.237    | 0.336 | 73.3 | 82          |
| Svob2007-chal2 | HF           | STO-3G    | MPA           | PUBCHEM   | MM  | 0.874 | 0.319 | 0.248    | 0.336 | 73.3 | 82          |
| Bult2004-aim   | B3LYP        | 6-31G*    | AIM           | RDKit     | NO  | 0.874 | 0.319 | 0.256    | 0.336 | 73.2 | 82          |
| QM             | B3LYP        | 6-31G*    | MPA           | PUBCHEM   | NO  | 0.873 | 0.320 | 0.239    | 0.337 | 72.6 | 82          |
| Bult2004-aim   | B3LYP        | 6-31G*    | AIM           | PUBCHEM   | NO  | 0.873 | 0.320 | 0.240    | 0.337 | 72.5 | 82          |
| Bult2004-aim   | B3LYP        | 6-31G*    | AIM           | PUBCHEM   | MM  | 0.871 | 0.322 | 0.246    | 0.339 | 71.5 | 82          |
| Bult2002-npa   | B3LYP        | 6-31G*    | NPA           | RDKit     | MM  | 0.871 | 0.323 | 0.242    | 0.340 | 71.4 | 82          |
| QM             | B3LYP        | 6-31G*    | MPA           | PUBCHEM   | QM  | 0.871 | 0.323 | 0.235    | 0.340 | 71.2 | 82          |
| Bult2004-aim   | B3LYP        | 6-31G*    | AIM           | FROG2     | NO  | 0.870 | 0.324 | 0.231    | 0.341 | 70.6 | 82          |
| QM             | HF           | STO-3G    | MPA           | OPENBABEL | NO  | 0.869 | 0.325 | 0.239    | 0.342 | 70.3 | 82          |
| QM             | HF           | STO-3G    | MPA           | BALLOON   | MM  | 0.867 | 0.328 | 0.228    | 0.345 | 68.8 | 82          |
| Bult2002-npa   | B3LYP        | 6-31G*    | NPA           | FROG2     | QM  | 0.866 | 0.328 | 0.221    | 0.345 | 68.6 | 82          |
| Bult2002-npa   | B3LYP        | 6-31G*    | NPA           | PUBCHEM   | NO  | 0.866 | 0.329 | 0.232    | 0.346 | 68.3 | 82          |
| Bult2002-npa   | B3LYP        | 6-31G*    | NPA           | RDKit     | MM  | 0.866 | 0.329 | 0.260    | 0.346 | 68.2 | 82          |
| QM             | HF           | STO-3G    | MPA           | OPENBABEL | MM  | 0.863 | 0.332 | 0.247    | 0.350 | 66.8 | 82          |
| QM             | B3LYP        | 6-31G*    | AIM           | RDKit     | MM  | 0.862 | 0.334 | 0.254    | 0.351 | 66.0 | 82          |
| QM             | HF           | STO-3G    | MPA           | RDKit     | QM  | 0.861 | 0.335 | 0.249    | 0.353 | 65.2 | 82          |

Table S3a: Quality and statistical criteria of QM and EEM QSPR models.

| Charges        | Theory level | Basis set | Charge scheme | 3D source | Opt | $R^2$ | RMSE  | $\Delta$ | $s$   | $F$  | # molecules |
|----------------|--------------|-----------|---------------|-----------|-----|-------|-------|----------|-------|------|-------------|
| Bult2002-npa   | B3LYP        | 6-31G*    | NPA           | FROG2     | MM  | 0.860 | 0.335 | 0.237    | 0.353 | 65.2 | 82          |
| QM             | B3LYP        | 6-31G*    | AIM           | RDKit     | MM  | 0.860 | 0.336 | 0.246    | 0.354 | 65.0 | 82          |
| Svob2007-chal2 | HF           | STO-3G    | MPA           | NCI       | MM  | 0.860 | 0.337 | 0.263    | 0.354 | 64.7 | 82          |
| Svob2007-chal2 | HF           | STO-3G    | MPA           | FROG2     | MM  | 0.859 | 0.337 | 0.275    | 0.355 | 64.3 | 82          |
| Bult2002-npa   | B3LYP        | 6-31G*    | NPA           | OPENBABEL | QM  | 0.856 | 0.341 | 0.254    | 0.359 | 62.7 | 82          |
| QM             | B3LYP        | 6-31G*    | AIM           | RDKit     | QM  | 0.855 | 0.342 | 0.269    | 0.360 | 62.4 | 82          |
| QM             | B3LYP        | 6-31G*    | MPA           | NCI       | QM  | 0.854 | 0.343 | 0.244    | 0.361 | 61.9 | 82          |
| QM             | B3LYP        | 6-31G*    | MPA           | FROG2     | QM  | 0.853 | 0.344 | 0.250    | 0.363 | 61.3 | 82          |
| Bult2004-aim   | B3LYP        | 6-31G*    | AIM           | BALLOON   | NO  | 0.853 | 0.345 | 0.270    | 0.363 | 61.3 | 82          |
| Bult2004-aim   | B3LYP        | 6-31G*    | AIM           | RDKit     | MM  | 0.852 | 0.345 | 0.287    | 0.364 | 60.9 | 82          |
| Bult2004-aim   | B3LYP        | 6-31G*    | AIM           | BALLOON   | QM  | 0.851 | 0.346 | 0.276    | 0.364 | 60.6 | 82          |
| Bult2004-aim   | B3LYP        | 6-31G*    | AIM           | RDKit     | QM  | 0.851 | 0.346 | 0.275    | 0.364 | 60.6 | 82          |
| Bult2004-aim   | B3LYP        | 6-31G*    | AIM           | OPENBABEL | QM  | 0.851 | 0.346 | 0.267    | 0.365 | 60.5 | 82          |
| Bult2002-npa   | B3LYP        | 6-31G*    | NPA           | OPENBABEL | MM  | 0.849 | 0.350 | 0.265    | 0.368 | 59.2 | 82          |
| Bult2004-aim   | B3LYP        | 6-31G*    | AIM           | FROG2     | MM  | 0.848 | 0.350 | 0.279    | 0.368 | 59.2 | 82          |
| Bult2002-npa   | B3LYP        | 6-31G*    | NPA           | OPENBABEL | NO  | 0.848 | 0.350 | 0.264    | 0.369 | 58.9 | 82          |
| QM             | B3LYP        | 6-31G*    | AIM           | BALLOON   | NO  | 0.846 | 0.352 | 0.268    | 0.371 | 58.2 | 82          |
| QM             | B3LYP        | 6-31G*    | NPA           | OPENBABEL | NO  | 0.845 | 0.353 | 0.271    | 0.372 | 57.8 | 82          |
| QM             | HF           | STO-3G    | MPA           | OPENBABEL | QM  | 0.845 | 0.353 | 0.275    | 0.372 | 57.8 | 82          |
| Bult2004-aim   | B3LYP        | 6-31G*    | AIM           | RDKit     | MM  | 0.844 | 0.355 | 0.283    | 0.374 | 57.1 | 82          |
| QM             | B3LYP        | 6-31G*    | AIM           | BALLOON   | MM  | 0.843 | 0.356 | 0.267    | 0.375 | 56.7 | 82          |
| QM             | B3LYP        | 6-31G*    | NPA           | RDKit     | MM  | 0.842 | 0.357 | 0.259    | 0.375 | 56.5 | 82          |
| QM             | B3LYP        | 6-31G*    | NPA           | OPENBABEL | MM  | 0.841 | 0.358 | 0.275    | 0.377 | 56.0 | 82          |
| Svob2007-chal2 | HF           | STO-3G    | MPA           | FROG2     | QM  | 0.841 | 0.359 | 0.282    | 0.378 | 55.7 | 82          |
| Bult2004-aim   | B3LYP        | 6-31G*    | AIM           | BALLOON   | MM  | 0.837 | 0.363 | 0.290    | 0.382 | 54.3 | 82          |
| Svob2007-chal2 | HF           | STO-3G    | MPA           | RDKit     | NO  | 0.836 | 0.363 | 0.285    | 0.383 | 54.0 | 82          |
| Bult2004-aim   | B3LYP        | 6-31G*    | AIM           | OPENBABEL | MM  | 0.835 | 0.365 | 0.287    | 0.384 | 53.5 | 82          |
| Bult2004-aim   | B3LYP        | 6-31G*    | AIM           | NCI       | QM  | 0.834 | 0.366 | 0.291    | 0.385 | 53.1 | 82          |
| Svob2007-chal2 | HF           | STO-3G    | MPA           | FROG2     | NO  | 0.832 | 0.368 | 0.303    | 0.387 | 52.4 | 82          |
| Svob2007-chal2 | HF           | STO-3G    | MPA           | BALLOON   | NO  | 0.832 | 0.368 | 0.295    | 0.388 | 52.3 | 82          |
| Bult2002-npa   | B3LYP        | 6-31G*    | NPA           | FROG2     | NO  | 0.831 | 0.369 | 0.268    | 0.388 | 52.2 | 82          |
| QM             | B3LYP        | 6-31G*    | MPA           | FROG2     | MM  | 0.830 | 0.370 | 0.253    | 0.390 | 51.7 | 82          |
| Svob2007-chal2 | HF           | STO-3G    | MPA           | OPENBABEL | NO  | 0.830 | 0.370 | 0.317    | 0.390 | 51.6 | 82          |
| Bult2004-aim   | B3LYP        | 6-31G*    | AIM           | NCI       | MM  | 0.829 | 0.371 | 0.284    | 0.391 | 51.3 | 82          |
| Svob2007-chal2 | HF           | STO-3G    | MPA           | OPENBABEL | MM  | 0.827 | 0.373 | 0.319    | 0.393 | 50.7 | 82          |
| QM             | B3LYP        | 6-31G*    | AIM           | OPENBABEL | QM  | 0.827 | 0.374 | 0.282    | 0.393 | 50.5 | 82          |
| Bult2004-aim   | B3LYP        | 6-31G*    | AIM           | OPENBABEL | NO  | 0.826 | 0.374 | 0.295    | 0.394 | 50.3 | 82          |
| Svob2007-chal2 | HF           | STO-3G    | MPA           | PUBCHEM   | QM  | 0.825 | 0.376 | 0.289    | 0.395 | 49.9 | 82          |
| QM             | B3LYP        | 6-31G*    | NPA           | BALLOON   | QM  | 0.824 | 0.377 | 0.280    | 0.397 | 49.4 | 82          |
| Svob2007-chal2 | HF           | STO-3G    | MPA           | RDKit     | MM  | 0.823 | 0.377 | 0.303    | 0.397 | 49.3 | 82          |
| QM             | HF           | STO-3G    | MPA           | BALLOON   | NO  | 0.823 | 0.378 | 0.288    | 0.398 | 49.2 | 82          |
| QM             | B3LYP        | 6-31G*    | MPA           | RDKit     | MM  | 0.821 | 0.380 | 0.295    | 0.400 | 48.6 | 82          |
| Svob2007-chal2 | HF           | STO-3G    | MPA           | NCI       | QM  | 0.821 | 0.380 | 0.293    | 0.400 | 48.4 | 82          |
| QM             | B3LYP        | 6-31G*    | NPA           | BALLOON   | NO  | 0.819 | 0.383 | 0.278    | 0.403 | 47.7 | 82          |

Table S3a: Quality and statistical criteria of QM and EEM QSPR models.

| Charges        | Theory level | Basis set | Charge scheme | 3D source | Opt | $R^2$ | RMSE  | $\Delta$ | $s$   | $F$  | # molecules |
|----------------|--------------|-----------|---------------|-----------|-----|-------|-------|----------|-------|------|-------------|
| QM             | B3LYP        | 6-31G*    | AIM           | RDKit     | NO  | 0.817 | 0.384 | 0.295    | 0.404 | 47.2 | 82          |
| QM             | B3LYP        | 6-31G*    | NPA           | RDKit     | QM  | 0.814 | 0.388 | 0.281    | 0.408 | 46.2 | 82          |
| Svob2007-chal2 | HF           | STO-3G    | MPA           | OPENBABEL | QM  | 0.807 | 0.395 | 0.322    | 0.415 | 44.2 | 82          |
| QM             | B3LYP        | 6-31G*    | AIM           | BALLOON   | QM  | 0.807 | 0.395 | 0.299    | 0.416 | 44.1 | 82          |
| QM             | B3LYP        | 6-31G*    | NPA           | BALLOON   | MM  | 0.805 | 0.397 | 0.298    | 0.418 | 43.6 | 82          |
| QM             | B3LYP        | 6-31G*    | NPA           | OPENBABEL | QM  | 0.804 | 0.398 | 0.310    | 0.419 | 43.4 | 82          |
| QM             | B3LYP        | 6-31G*    | NPA           | RDKit     | NO  | 0.804 | 0.398 | 0.296    | 0.419 | 43.4 | 82          |
| Svob2007-chal2 | HF           | STO-3G    | MPA           | RDKit     | MM  | 0.801 | 0.401 | 0.328    | 0.422 | 42.5 | 82          |
| Svob2007-chal2 | HF           | STO-3G    | MPA           | BALLOON   | MM  | 0.800 | 0.401 | 0.336    | 0.422 | 42.4 | 82          |
| QM             | B3LYP        | 6-31G*    | NPA           | RDKit     | MM  | 0.797 | 0.405 | 0.311    | 0.426 | 41.4 | 82          |
| QM             | HF           | STO-3G    | MPA           | RDKit     | NO  | 0.780 | 0.421 | 0.328    | 0.443 | 37.6 | 82          |
| Svob2007-chal2 | HF           | STO-3G    | MPA           | BALLOON   | QM  | 0.772 | 0.429 | 0.348    | 0.451 | 35.8 | 82          |
| Svob2007-chal2 | HF           | STO-3G    | MPA           | RDKit     | QM  | 0.753 | 0.446 | 0.358    | 0.470 | 32.2 | 82          |
| QM             | B3LYP        | 6-31G*    | MPA           | RDKit     | MM  | 0.750 | 0.449 | 0.353    | 0.473 | 31.7 | 82          |
| QM             | B3LYP        | 6-31G*    | MPA           | RDKit     | NO  | 0.723 | 0.473 | 0.373    | 0.497 | 27.6 | 82          |
| QM             | B3LYP        | 6-31G*    | MPA           | BALLOON   | NO  | 0.720 | 0.475 | 0.375    | 0.500 | 27.2 | 82          |
| QM             | B3LYP        | 6-31G*    | MPA           | RDKit     | QM  | 0.696 | 0.495 | 0.356    | 0.521 | 24.2 | 82          |
| QM             | B3LYP        | 6-31G*    | MPA           | OPENBABEL | QM  | 0.674 | 0.513 | 0.388    | 0.540 | 21.9 | 82          |
| QM             | B3LYP        | 6-31G*    | MPA           | OPENBABEL | MM  | 0.665 | 0.519 | 0.382    | 0.547 | 21.0 | 82          |
| QM             | B3LYP        | 6-31G*    | MPA           | OPENBABEL | NO  | 0.658 | 0.525 | 0.383    | 0.553 | 20.3 | 82          |
| QM             | B3LYP        | 6-31G*    | MPA           | BALLOON   | QM  | 0.618 | 0.555 | 0.451    | 0.585 | 17.1 | 82          |
| QM             | B3LYP        | 6-31G*    | MPA           | BALLOON   | MM  | 0.587 | 0.577 | 0.452    | 0.607 | 15.0 | 82          |

Table S3a: Quality and statistical criteria of QM and EEM QSPR models.

| Charges         | Theory level | Basis set | Charge scheme | 3D source | Opt | $R^2$ | RMSE  | $\bar{\Delta}$ | $s$   | $F$   | # molecules |
|-----------------|--------------|-----------|---------------|-----------|-----|-------|-------|----------------|-------|-------|-------------|
| <b>Anilines</b> |              |           |               |           |     |       |       |                |       |       |             |
| QM              | B3LYP        | 6-31G*    | AIM           | RDKit     | MM  | 0.980 | 0.312 | 0.260          | 0.342 | 280.6 | 48          |
| QM              | B3LYP        | 6-31G*    | MPA           | RDKit     | MM  | 0.979 | 0.318 | 0.251          | 0.348 | 271.0 | 48          |
| QM              | B3LYP        | 6-31G*    | MPA           | PUBCHEM   | MM  | 0.979 | 0.320 | 0.260          | 0.351 | 267.0 | 48          |
| QM              | B3LYP        | 6-31G*    | MPA           | RDKit     | MM  | 0.976 | 0.345 | 0.261          | 0.378 | 228.5 | 48          |
| QM              | B3LYP        | 6-31G*    | MPA           | OPENBABEL | MM  | 0.975 | 0.346 | 0.264          | 0.379 | 227.1 | 48          |
| QM              | B3LYP        | 6-31G*    | MPA           | OPENBABEL | QM  | 0.974 | 0.357 | 0.266          | 0.391 | 213.2 | 48          |
| QM              | B3LYP        | 6-31G*    | MPA           | PUBCHEM   | QM  | 0.974 | 0.360 | 0.281          | 0.394 | 210.1 | 48          |
| QM              | B3LYP        | 6-31G*    | MPA           | OPENBABEL | NO  | 0.973 | 0.361 | 0.260          | 0.395 | 208.8 | 48          |
| QM              | B3LYP        | 6-31G*    | MPA           | FROG2     | MM  | 0.973 | 0.361 | 0.282          | 0.395 | 208.6 | 48          |
| QM              | B3LYP        | 6-31G*    | NPA           | RDKit     | MM  | 0.973 | 0.363 | 0.288          | 0.397 | 206.6 | 48          |
| QM              | B3LYP        | 6-31G*    | MPA           | FROG2     | QM  | 0.973 | 0.366 | 0.270          | 0.401 | 203.2 | 48          |
| QM              | B3LYP        | 6-31G*    | MPA           | NCI       | NO  | 0.970 | 0.384 | 0.279          | 0.421 | 183.3 | 48          |
| QM              | B3LYP        | 6-31G*    | MPA           | BALLOON   | QM  | 0.967 | 0.400 | 0.295          | 0.438 | 169.1 | 48          |
| QM              | B3LYP        | 6-31G*    | NPA           | OPENBABEL | MM  | 0.967 | 0.401 | 0.306          | 0.439 | 168.4 | 48          |
| QM              | B3LYP        | 6-31G*    | NPA           | NCI       | MM  | 0.967 | 0.401 | 0.313          | 0.439 | 168.2 | 48          |
| QM              | B3LYP        | 6-31G*    | NPA           | RDKit     | MM  | 0.967 | 0.402 | 0.307          | 0.440 | 167.2 | 48          |
| QM              | B3LYP        | 6-31G*    | NPA           | PUBCHEM   | MM  | 0.966 | 0.407 | 0.341          | 0.445 | 163.2 | 48          |
| QM              | B3LYP        | 6-31G*    | NPA           | NCI       | NO  | 0.966 | 0.408 | 0.286          | 0.447 | 162.1 | 48          |
| QM              | B3LYP        | 6-31G*    | NPA           | OPENBABEL | NO  | 0.966 | 0.409 | 0.294          | 0.448 | 161.0 | 48          |
| QM              | B3LYP        | 6-31G*    | NPA           | FROG2     | MM  | 0.965 | 0.413 | 0.318          | 0.453 | 157.8 | 48          |
| QM              | HF           | STO-3G    | MPA           | RDKit     | MM  | 0.965 | 0.414 | 0.327          | 0.454 | 157.0 | 48          |
| QM              | B3LYP        | 6-31G*    | MPA           | RDKit     | QM  | 0.964 | 0.421 | 0.296          | 0.462 | 151.6 | 48          |
| QM              | B3LYP        | 6-31G*    | MPA           | NCI       | QM  | 0.959 | 0.447 | 0.315          | 0.490 | 134.0 | 48          |
| QM              | HF           | STO-3G    | MPA           | RDKit     | MM  | 0.959 | 0.450 | 0.363          | 0.493 | 132.1 | 48          |
| QM              | HF           | STO-3G    | MPA           | FROG2     | MM  | 0.958 | 0.455 | 0.370          | 0.498 | 129.2 | 48          |
| QM              | HF           | STO-3G    | MPA           | OPENBABEL | MM  | 0.958 | 0.455 | 0.367          | 0.499 | 129.1 | 48          |
| QM              | B3LYP        | 6-31G*    | MPA           | NCI       | MM  | 0.955 | 0.467 | 0.311          | 0.511 | 122.5 | 48          |
| QM              | HF           | STO-3G    | MPA           | NCI       | MM  | 0.954 | 0.472 | 0.363          | 0.517 | 119.8 | 48          |
| QM              | B3LYP        | 6-31G*    | MPA           | BALLOON   | MM  | 0.953 | 0.480 | 0.320          | 0.526 | 115.4 | 48          |
| Svob2007-chal2  | HF           | STO-3G    | MPA           | BALLOON   | QM  | 0.953 | 0.480 | 0.378          | 0.526 | 115.3 | 48          |
| QM              | HF           | STO-3G    | MPA           | OPENBABEL | NO  | 0.952 | 0.484 | 0.367          | 0.530 | 113.7 | 48          |
| QM              | HF           | STO-3G    | MPA           | NCI       | NO  | 0.951 | 0.488 | 0.367          | 0.534 | 111.6 | 48          |
| QM              | HF           | STO-3G    | MPA           | BALLOON   | QM  | 0.948 | 0.504 | 0.391          | 0.552 | 104.3 | 48          |
| Svob2007-chal2  | HF           | STO-3G    | MPA           | OPENBABEL | QM  | 0.946 | 0.515 | 0.414          | 0.564 | 99.8  | 48          |
| Bult2004-aim    | B3LYP        | 6-31G*    | AIM           | BALLOON   | QM  | 0.945 | 0.517 | 0.385          | 0.566 | 99.0  | 48          |
| QM              | HF           | STO-3G    | MPA           | NCI       | QM  | 0.942 | 0.532 | 0.421          | 0.582 | 93.1  | 48          |
| QM              | HF           | STO-3G    | MPA           | PUBCHEM   | MM  | 0.942 | 0.532 | 0.402          | 0.583 | 92.9  | 48          |
| QM              | HF           | STO-3G    | MPA           | RDKit     | QM  | 0.940 | 0.541 | 0.407          | 0.592 | 89.9  | 48          |
| QM              | B3LYP        | 6-31G*    | MPA           | PUBCHEM   | NO  | 0.939 | 0.544 | 0.412          | 0.596 | 88.5  | 48          |
| Svob2007-chal2  | HF           | STO-3G    | MPA           | FROG2     | QM  | 0.939 | 0.545 | 0.438          | 0.597 | 88.3  | 48          |
| Bult2002-mpa    | B3LYP        | 6-31G*    | NPA           | OPENBABEL | QM  | 0.939 | 0.546 | 0.453          | 0.598 | 88.1  | 48          |
| Bult2004-aim    | B3LYP        | 6-31G*    | AIM           | FROG2     | QM  | 0.939 | 0.547 | 0.463          | 0.599 | 87.7  | 48          |



Table S3a: Quality and statistical criteria of QM and EEM QSPR models.

| Charges        | Theory level | Basis set | Charge scheme | 3D source | Opt | $R^2$ | RMSE  | $\Delta$ | $s$   | $F$  | # molecules |
|----------------|--------------|-----------|---------------|-----------|-----|-------|-------|----------|-------|------|-------------|
| QM             | HF           | STO-3G    | MPA           | PUBCHEM   | NO  | 0.938 | 0.549 | 0.405    | 0.601 | 87.1 | 48          |
| QM             | B3LYP        | 6-31G*    | AIM           | PUBCHEM   | NO  | 0.937 | 0.554 | 0.427    | 0.607 | 85.2 | 48          |
| QM             | B3LYP        | 6-31G*    | NPA           | NCI       | QM  | 0.937 | 0.555 | 0.399    | 0.608 | 84.9 | 48          |
| Chavez2006     | B3LYP        | 6-31G*    | MPA           | OPENBABEL | QM  | 0.935 | 0.565 | 0.484    | 0.619 | 81.8 | 48          |
| Bult2004-aim   | B3LYP        | 6-31G*    | AIM           | OPENBABEL | QM  | 0.934 | 0.566 | 0.475    | 0.620 | 81.3 | 48          |
| QM             | HF           | STO-3G    | MPA           | PUBCHEM   | QM  | 0.934 | 0.568 | 0.447    | 0.622 | 81.0 | 48          |
| QM             | HF           | STO-3G    | MPA           | FROG2     | NO  | 0.934 | 0.569 | 0.459    | 0.623 | 80.6 | 48          |
| Svob2007-chal2 | HF           | STO-3G    | MPA           | RDKit     | QM  | 0.933 | 0.570 | 0.461    | 0.625 | 80.1 | 48          |
| QM             | B3LYP        | 6-31G*    | NPA           | BALLOON   | QM  | 0.933 | 0.572 | 0.436    | 0.627 | 79.5 | 48          |
| Chavez2006     | B3LYP        | 6-31G*    | MPA           | BALLOON   | QM  | 0.930 | 0.584 | 0.456    | 0.639 | 76.3 | 48          |
| QM             | B3LYP        | 6-31G*    | AIM           | OPENBABEL | NO  | 0.930 | 0.587 | 0.444    | 0.643 | 75.4 | 48          |
| QM             | B3LYP        | 6-31G*    | NPA           | OPENBABEL | QM  | 0.928 | 0.592 | 0.462    | 0.649 | 74.0 | 48          |
| QM             | B3LYP        | 6-31G*    | NPA           | BALLOON   | MM  | 0.927 | 0.596 | 0.459    | 0.653 | 73.0 | 48          |
| QM             | B3LYP        | 6-31G*    | AIM           | OPENBABEL | MM  | 0.927 | 0.597 | 0.470    | 0.654 | 72.6 | 48          |
| Bult2004-aim   | B3LYP        | 6-31G*    | AIM           | PUBCHEM   | QM  | 0.927 | 0.598 | 0.475    | 0.655 | 72.3 | 48          |
| QM             | B3LYP        | 6-31G*    | AIM           | RDKit     | MM  | 0.927 | 0.598 | 0.459    | 0.656 | 72.3 | 48          |
| QM             | B3LYP        | 6-31G*    | NPA           | RDKit     | QM  | 0.927 | 0.599 | 0.469    | 0.656 | 72.1 | 48          |
| QM             | B3LYP        | 6-31G*    | AIM           | FROG2     | MM  | 0.926 | 0.602 | 0.481    | 0.659 | 71.4 | 48          |
| Chavez2006     | B3LYP        | 6-31G*    | MPA           | FROG2     | QM  | 0.926 | 0.602 | 0.521    | 0.660 | 71.3 | 48          |
| QM             | B3LYP        | 6-31G*    | NPA           | FROG2     | NO  | 0.924 | 0.611 | 0.492    | 0.670 | 69.0 | 48          |
| Bult2004-aim   | B3LYP        | 6-31G*    | AIM           | RDKit     | QM  | 0.923 | 0.612 | 0.485    | 0.671 | 68.8 | 48          |
| QM             | B3LYP        | 6-31G*    | AIM           | BALLOON   | QM  | 0.921 | 0.620 | 0.469    | 0.679 | 66.9 | 48          |
| QM             | B3LYP        | 6-31G*    | NPA           | PUBCHEM   | NO  | 0.921 | 0.621 | 0.440    | 0.681 | 66.6 | 48          |
| QM             | B3LYP        | 6-31G*    | AIM           | BALLOON   | MM  | 0.921 | 0.622 | 0.465    | 0.681 | 66.6 | 48          |
| Svob2007-chal2 | HF           | STO-3G    | MPA           | NCI       | QM  | 0.921 | 0.622 | 0.490    | 0.681 | 66.5 | 48          |
| Bult2004-aim   | B3LYP        | 6-31G*    | AIM           | NCI       | QM  | 0.920 | 0.626 | 0.491    | 0.686 | 65.5 | 48          |
| QM             | B3LYP        | 6-31G*    | AIM           | FROG2     | NO  | 0.916 | 0.642 | 0.503    | 0.703 | 62.0 | 48          |
| QM             | B3LYP        | 6-31G*    | AIM           | PUBCHEM   | MM  | 0.916 | 0.642 | 0.507    | 0.704 | 62.0 | 48          |
| QM             | B3LYP        | 6-31G*    | AIM           | NCI       | MM  | 0.914 | 0.650 | 0.523    | 0.712 | 60.4 | 48          |
| QM             | B3LYP        | 6-31G*    | NPA           | BALLOON   | NO  | 0.912 | 0.656 | 0.535    | 0.718 | 59.3 | 48          |
| QM             | B3LYP        | 6-31G*    | MPA           | FROG2     | NO  | 0.911 | 0.658 | 0.552    | 0.721 | 58.8 | 48          |
| QM             | B3LYP        | 6-31G*    | NPA           | FROG2     | QM  | 0.911 | 0.661 | 0.524    | 0.724 | 58.2 | 48          |
| Bult2002-npa   | B3LYP        | 6-31G*    | NPA           | BALLOON   | QM  | 0.908 | 0.671 | 0.525    | 0.735 | 56.4 | 48          |
| QM             | B3LYP        | 6-31G*    | AIM           | RDKit     | QM  | 0.908 | 0.671 | 0.513    | 0.735 | 56.3 | 48          |
| Bult2002-npa   | B3LYP        | 6-31G*    | NPA           | FROG2     | QM  | 0.907 | 0.673 | 0.533    | 0.737 | 55.9 | 48          |
| Bult2004-aim   | B3LYP        | 6-31G*    | AIM           | PUBCHEM   | NO  | 0.907 | 0.675 | 0.534    | 0.739 | 55.6 | 48          |
| Chavez2006     | B3LYP        | 6-31G*    | MPA           | PUBCHEM   | QM  | 0.905 | 0.683 | 0.549    | 0.748 | 54.2 | 48          |
| Bult2002-npa   | B3LYP        | 6-31G*    | NPA           | FROG2     | NO  | 0.904 | 0.683 | 0.528    | 0.749 | 54.1 | 48          |
| QM             | B3LYP        | 6-31G*    | AIM           | NCI       | NO  | 0.903 | 0.688 | 0.498    | 0.753 | 53.4 | 48          |
| QM             | B3LYP        | 6-31G*    | MPA           | BALLOON   | NO  | 0.903 | 0.689 | 0.531    | 0.754 | 53.2 | 48          |
| Bult2004-aim   | B3LYP        | 6-31G*    | AIM           | FROG2     | MM  | 0.902 | 0.693 | 0.570    | 0.760 | 52.4 | 48          |
| Bult2004-aim   | B3LYP        | 6-31G*    | AIM           | PUBCHEM   | MM  | 0.900 | 0.700 | 0.566    | 0.767 | 51.3 | 48          |
| Bult2004-aim   | B3LYP        | 6-31G*    | AIM           | OPENBABEL | NO  | 0.899 | 0.702 | 0.570    | 0.768 | 51.0 | 48          |
| Bult2004-aim   | B3LYP        | 6-31G*    | AIM           | OPENBABEL | MM  | 0.897 | 0.709 | 0.569    | 0.776 | 49.9 | 48          |

Table S3a: Quality and statistical criteria of QM and EEM QSPR models.

| Charges        | Theory level | Basis set | Charge scheme | 3D source | Opt | $R^2$ | RMSE  | $\Delta$ | $s$   | $F$  | # molecules |
|----------------|--------------|-----------|---------------|-----------|-----|-------|-------|----------|-------|------|-------------|
| Bult2004-aim   | B3LYP        | 6-31G*    | AIM           | RDKit     | MM  | 0.897 | 0.711 | 0.576    | 0.779 | 49.5 | 48          |
| Svob2007-chal2 | HF           | STO-3G    | MPA           | FROG2     | NO  | 0.894 | 0.721 | 0.569    | 0.790 | 48.0 | 48          |
| QM             | B3LYP        | 6-31G*    | AIM           | NCI       | QM  | 0.892 | 0.726 | 0.591    | 0.795 | 47.3 | 48          |
| Chavez2006     | B3LYP        | 6-31G*    | MPA           | RDKit     | QM  | 0.892 | 0.727 | 0.581    | 0.797 | 47.1 | 48          |
| Svob2007-chal2 | HF           | STO-3G    | MPA           | PUBCHEM   | QM  | 0.890 | 0.735 | 0.602    | 0.805 | 46.0 | 48          |
| Bult2004-aim   | B3LYP        | 6-31G*    | AIM           | NCI       | MM  | 0.889 | 0.738 | 0.551    | 0.809 | 45.5 | 48          |
| Bult2004-aim   | B3LYP        | 6-31G*    | AIM           | FROG2     | NO  | 0.887 | 0.744 | 0.540    | 0.815 | 44.8 | 48          |
| Svob2007-chal2 | HF           | STO-3G    | MPA           | PUBCHEM   | MM  | 0.886 | 0.746 | 0.577    | 0.817 | 44.5 | 48          |
| QM             | B3LYP        | 6-31G*    | NPA           | PUBCHEM   | QM  | 0.885 | 0.749 | 0.553    | 0.821 | 44.1 | 48          |
| Chavez2006     | B3LYP        | 6-31G*    | MPA           | NCI       | QM  | 0.884 | 0.753 | 0.618    | 0.825 | 43.5 | 48          |
| Bult2004-aim   | B3LYP        | 6-31G*    | AIM           | NCI       | NO  | 0.882 | 0.758 | 0.606    | 0.831 | 42.9 | 48          |
| Chavez2006     | B3LYP        | 6-31G*    | MPA           | PUBCHEM   | NO  | 0.881 | 0.763 | 0.622    | 0.836 | 42.3 | 48          |
| Bult2004-aim   | B3LYP        | 6-31G*    | AIM           | BALLOON   | MM  | 0.880 | 0.767 | 0.594    | 0.840 | 41.8 | 48          |
| QM             | B3LYP        | 6-31G*    | AIM           | OPENBABEL | QM  | 0.880 | 0.767 | 0.615    | 0.841 | 41.7 | 48          |
| Chavez2006     | B3LYP        | 6-31G*    | MPA           | FROG2     | NO  | 0.879 | 0.770 | 0.577    | 0.844 | 41.4 | 48          |
| Bult2004-aim   | B3LYP        | 6-31G*    | AIM           | RDKit     | MM  | 0.875 | 0.780 | 0.596    | 0.855 | 40.2 | 48          |
| QM             | HF           | STO-3G    | MPA           | FROG2     | QM  | 0.875 | 0.782 | 0.668    | 0.857 | 39.9 | 48          |
| QM             | HF           | STO-3G    | MPA           | BALLOON   | MM  | 0.874 | 0.785 | 0.595    | 0.860 | 39.6 | 48          |
| Svob2007-chal2 | HF           | STO-3G    | MPA           | PUBCHEM   | NO  | 0.874 | 0.785 | 0.627    | 0.860 | 39.6 | 48          |
| Bult2002-npa   | B3LYP        | 6-31G*    | NPA           | PUBCHEM   | NO  | 0.874 | 0.786 | 0.653    | 0.861 | 39.5 | 48          |
| QM             | HF           | STO-3G    | MPA           | OPENBABEL | QM  | 0.874 | 0.786 | 0.674    | 0.861 | 39.5 | 48          |
| Bult2002-npa   | B3LYP        | 6-31G*    | NPA           | PUBCHEM   | MM  | 0.872 | 0.790 | 0.624    | 0.865 | 39.0 | 48          |
| Svob2007-chal2 | HF           | STO-3G    | MPA           | NCI       | NO  | 0.870 | 0.796 | 0.606    | 0.872 | 38.4 | 48          |
| Bult2004-aim   | B3LYP        | 6-31G*    | AIM           | BALLOON   | NO  | 0.870 | 0.797 | 0.637    | 0.873 | 38.3 | 48          |
| Bult2002-npa   | B3LYP        | 6-31G*    | NPA           | RDKit     | QM  | 0.869 | 0.801 | 0.670    | 0.877 | 37.8 | 48          |
| Bult2002-npa   | B3LYP        | 6-31G*    | NPA           | NCI       | QM  | 0.869 | 0.801 | 0.671    | 0.878 | 37.8 | 48          |
| Bult2002-npa   | B3LYP        | 6-31G*    | NPA           | PUBCHEM   | QM  | 0.867 | 0.805 | 0.663    | 0.882 | 37.4 | 48          |
| Svob2007-chal2 | HF           | STO-3G    | MPA           | BALLOON   | MM  | 0.867 | 0.806 | 0.611    | 0.883 | 37.3 | 48          |
| Svob2007-chal2 | HF           | STO-3G    | MPA           | FROG2     | MM  | 0.863 | 0.818 | 0.647    | 0.896 | 36.1 | 48          |
| Svob2007-chal2 | HF           | STO-3G    | MPA           | OPENBABEL | NO  | 0.860 | 0.827 | 0.652    | 0.906 | 35.1 | 48          |
| Svob2007-chal2 | HF           | STO-3G    | MPA           | OPENBABEL | MM  | 0.858 | 0.833 | 0.664    | 0.913 | 34.5 | 48          |
| Bult2002-npa   | B3LYP        | 6-31G*    | NPA           | OPENBABEL | MM  | 0.857 | 0.835 | 0.646    | 0.915 | 34.4 | 48          |
| Bult2004-aim   | B3LYP        | 6-31G*    | AIM           | RDKit     | NO  | 0.857 | 0.835 | 0.623    | 0.915 | 34.3 | 48          |
| Chavez2006     | B3LYP        | 6-31G*    | MPA           | FROG2     | MM  | 0.857 | 0.837 | 0.703    | 0.917 | 34.1 | 48          |
| Bult2002-npa   | B3LYP        | 6-31G*    | NPA           | BALLOON   | MM  | 0.855 | 0.842 | 0.637    | 0.923 | 33.7 | 48          |
| Bult2002-npa   | B3LYP        | 6-31G*    | NPA           | RDKit     | MM  | 0.854 | 0.846 | 0.666    | 0.926 | 33.3 | 48          |
| QM             | HF           | STO-3G    | MPA           | RDKit     | NO  | 0.853 | 0.847 | 0.690    | 0.928 | 33.2 | 48          |
| QM             | B3LYP        | 6-31G*    | AIM           | FROG2     | QM  | 0.853 | 0.849 | 0.687    | 0.930 | 33.1 | 48          |
| Bult2002-npa   | B3LYP        | 6-31G*    | NPA           | FROG2     | MM  | 0.852 | 0.850 | 0.669    | 0.931 | 33.0 | 48          |
| Chavez2006     | B3LYP        | 6-31G*    | MPA           | RDKit     | MM  | 0.852 | 0.850 | 0.706    | 0.931 | 32.9 | 48          |
| Chavez2006     | B3LYP        | 6-31G*    | MPA           | NCI       | NO  | 0.852 | 0.851 | 0.683    | 0.932 | 32.9 | 48          |
| Chavez2006     | B3LYP        | 6-31G*    | MPA           | PUBCHEM   | MM  | 0.852 | 0.851 | 0.683    | 0.933 | 32.8 | 48          |
| Bult2002-npa   | B3LYP        | 6-31G*    | NPA           | OPENBABEL | NO  | 0.851 | 0.853 | 0.688    | 0.935 | 32.6 | 48          |
| Chavez2006     | B3LYP        | 6-31G*    | MPA           | OPENBABEL | MM  | 0.851 | 0.854 | 0.701    | 0.936 | 32.6 | 48          |

Table S3a: Quality and statistical criteria of QM and EEM QSPR models.

| Charges        | Theory level | Basis set | Charge scheme | 3D source | Opt | $R^2$ | RMSE  | $\Delta$ | $s$   | $F$  | # molecules |
|----------------|--------------|-----------|---------------|-----------|-----|-------|-------|----------|-------|------|-------------|
| QM             | B3LYP        | 6-31G*    | NPA           | RDKit     | NO  | 0.851 | 0.854 | 0.712    | 0.936 | 32.6 | 48          |
| Chavez2006     | B3LYP        | 6-31G*    | MPA           | OPENBABEL | NO  | 0.849 | 0.859 | 0.689    | 0.941 | 32.1 | 48          |
| Bult2002-npa   | B3LYP        | 6-31G*    | NPA           | NCI       | MM  | 0.848 | 0.863 | 0.663    | 0.945 | 31.8 | 48          |
| Chavez2006     | B3LYP        | 6-31G*    | MPA           | BALLOON   | NO  | 0.847 | 0.866 | 0.670    | 0.948 | 31.5 | 48          |
| Svob2007-chal2 | HF           | STO-3G    | MPA           | RDKit     | MM  | 0.846 | 0.867 | 0.682    | 0.950 | 31.4 | 48          |
| Chavez2006     | B3LYP        | 6-31G*    | MPA           | RDKit     | MM  | 0.845 | 0.872 | 0.684    | 0.955 | 31.0 | 48          |
| Chavez2006     | B3LYP        | 6-31G*    | MPA           | BALLOON   | MM  | 0.845 | 0.872 | 0.656    | 0.955 | 31.0 | 48          |
| Svob2007-chal2 | HF           | STO-3G    | MPA           | NCI       | MM  | 0.844 | 0.874 | 0.663    | 0.957 | 30.9 | 48          |
| Bult2002-npa   | B3LYP        | 6-31G*    | NPA           | RDKit     | MM  | 0.843 | 0.876 | 0.689    | 0.960 | 30.7 | 48          |
| Chavez2006     | B3LYP        | 6-31G*    | MPA           | RDKit     | NO  | 0.842 | 0.878 | 0.664    | 0.962 | 30.5 | 48          |
| Bult2002-npa   | B3LYP        | 6-31G*    | NPA           | RDKit     | NO  | 0.840 | 0.885 | 0.692    | 0.969 | 30.0 | 48          |
| Bult2002-npa   | B3LYP        | 6-31G*    | NPA           | NCI       | NO  | 0.839 | 0.887 | 0.695    | 0.971 | 29.8 | 48          |
| Svob2007-chal2 | HF           | STO-3G    | MPA           | RDKit     | MM  | 0.838 | 0.891 | 0.721    | 0.976 | 29.5 | 48          |
| QM             | HF           | STO-3G    | MPA           | BALLOON   | NO  | 0.836 | 0.894 | 0.710    | 0.979 | 29.2 | 48          |
| Chavez2006     | B3LYP        | 6-31G*    | MPA           | NCI       | MM  | 0.834 | 0.900 | 0.702    | 0.985 | 28.8 | 48          |
| Svob2007-chal2 | HF           | STO-3G    | MPA           | RDKit     | NO  | 0.832 | 0.907 | 0.732    | 0.994 | 28.2 | 48          |
| QM             | B3LYP        | 6-31G*    | AIM           | PUBCHEM   | QM  | 0.828 | 0.918 | 0.768    | 1.006 | 27.4 | 48          |
| Bult2002-npa   | B3LYP        | 6-31G*    | NPA           | BALLOON   | NO  | 0.826 | 0.922 | 0.701    | 1.010 | 27.2 | 48          |
| QM             | B3LYP        | 6-31G*    | MPA           | RDKit     | NO  | 0.816 | 0.948 | 0.814    | 1.038 | 25.4 | 48          |
| Svob2007-chal2 | HF           | STO-3G    | MPA           | BALLOON   | NO  | 0.806 | 0.974 | 0.806    | 1.067 | 23.7 | 48          |
| QM             | B3LYP        | 6-31G*    | AIM           | BALLOON   | NO  | 0.805 | 0.977 | 0.765    | 1.070 | 23.6 | 48          |
| QM             | B3LYP        | 6-31G*    | AIM           | RDKit     | NO  | 0.796 | 0.998 | 0.770    | 1.093 | 22.3 | 48          |

Table S3b: Quality and statistical criteria of PM6 and Gasteiger QSPR models.

| Charges        | Theory level | Basis set | Charge scheme | 3D source | Opt | $R^2$ | RMSE  | $\bar{\Delta}$ | $s$   | $F$   | # molecules |
|----------------|--------------|-----------|---------------|-----------|-----|-------|-------|----------------|-------|-------|-------------|
| <b>Phenols</b> |              |           |               |           |     |       |       |                |       |       |             |
| QM             | PM6          | none      | MPA           | NCI       | MM  | 0.962 | 0.408 | 0.319          | 0.430 | 269.9 | 60          |
| QM             | PM6          | none      | MPA           | FROG2     | QM  | 0.959 | 0.419 | 0.305          | 0.441 | 255.7 | 60          |
| QM             | PM6          | none      | MPA           | OPENBABEL | MM  | 0.959 | 0.419 | 0.317          | 0.441 | 255.5 | 60          |
| QM             | PM6          | none      | MPA           | RDKit     | MM  | 0.952 | 0.455 | 0.330          | 0.480 | 214.5 | 60          |
| QM             | PM6          | none      | MPA           | OPENBABEL | QM  | 0.952 | 0.455 | 0.333          | 0.480 | 214.4 | 60          |
| QM             | PM6          | none      | MPA           | NCI       | NO  | 0.950 | 0.463 | 0.349          | 0.488 | 207.0 | 60          |
| QM             | PM6          | none      | MPA           | OPENBABEL | NO  | 0.949 | 0.468 | 0.352          | 0.494 | 202.2 | 60          |
| QM             | PM6          | none      | MPA           | FROG2     | MM  | 0.942 | 0.501 | 0.363          | 0.528 | 175.0 | 60          |
| QM             | PM6          | none      | MPA           | RDKit     | QM  | 0.940 | 0.508 | 0.371          | 0.536 | 170.1 | 60          |
| QM             | PM6          | none      | MPA           | FROG2     | NO  | 0.939 | 0.514 | 0.376          | 0.542 | 166.1 | 60          |
| QM             | PM6          | none      | MPA           | PUBCHEM   | NO  | 0.934 | 0.532 | 0.381          | 0.561 | 154.0 | 60          |
| QM             | PM6          | none      | MPA           | RDKit     | MM  | 0.931 | 0.547 | 0.377          | 0.577 | 145.2 | 60          |
| QM             | PM6          | none      | MPA           | PUBCHEM   | QM  | 0.929 | 0.555 | 0.387          | 0.585 | 140.8 | 60          |
| QM             | PM6          | none      | MPA           | PUBCHEM   | MM  | 0.915 | 0.607 | 0.443          | 0.640 | 116.0 | 60          |
| QM             | PM6          | none      | MPA           | BALLOON   | NO  | 0.900 | 0.656 | 0.500          | 0.692 | 97.6  | 60          |
| QM             | PM6          | none      | MPA           | BALLOON   | MM  | 0.889 | 0.692 | 0.488          | 0.730 | 86.7  | 60          |
| QM             | PM6          | none      | MPA           | BALLOON   | QM  | 0.886 | 0.703 | 0.495          | 0.741 | 83.6  | 60          |
| QM             | PM6          | none      | MPA           | NCI       | QM  | 0.878 | 0.727 | 0.586          | 0.767 | 77.5  | 60          |
| QM             | PM6          | none      | MPA           | RDKit     | NO  | 0.868 | 0.756 | 0.629          | 0.797 | 70.9  | 60          |
| Gasteiger      |              |           |               | NCI       | NO  | 0.747 | 1.047 | 0.753          | 1.103 | 31.8  | 60          |

Table S3b: Quality and statistical criteria of PM6 and Gasteiger QSPR models.

| Charges                 | Theory level | Basis set | Charge scheme | 3D source | Opt | $R^2$ | RMSE  | $\bar{\Delta}$ | $s$   | $F$   | # molecules |
|-------------------------|--------------|-----------|---------------|-----------|-----|-------|-------|----------------|-------|-------|-------------|
| <b>Carboxylic acids</b> |              |           |               |           |     |       |       |                |       |       |             |
| QM                      | PM6          | none      | MPA           | NCI       | NO  | 0.941 | 0.217 | 0.160          | 0.229 | 169.8 | 82          |
| QM                      | PM6          | none      | MPA           | NCI       | MM  | 0.936 | 0.227 | 0.163          | 0.239 | 154.3 | 82          |
| QM                      | PM6          | none      | MPA           | PUBCHEM   | NO  | 0.933 | 0.233 | 0.172          | 0.245 | 146.4 | 82          |
| QM                      | PM6          | none      | MPA           | NCI       | QM  | 0.932 | 0.233 | 0.171          | 0.246 | 146.0 | 82          |
| QM                      | PM6          | none      | MPA           | FROG2     | MM  | 0.931 | 0.235 | 0.169          | 0.247 | 143.7 | 82          |
| QM                      | PM6          | none      | MPA           | FROG2     | QM  | 0.927 | 0.243 | 0.173          | 0.256 | 133.7 | 82          |
| QM                      | PM6          | none      | MPA           | PUBCHEM   | MM  | 0.926 | 0.244 | 0.174          | 0.257 | 133.0 | 82          |
| QM                      | PM6          | none      | MPA           | OPENBABEL | MM  | 0.920 | 0.254 | 0.194          | 0.267 | 121.5 | 82          |
| QM                      | PM6          | none      | MPA           | PUBCHEM   | QM  | 0.919 | 0.255 | 0.190          | 0.269 | 120.4 | 82          |
| QM                      | PM6          | none      | MPA           | OPENBABEL | NO  | 0.919 | 0.256 | 0.196          | 0.270 | 119.5 | 82          |
| QM                      | PM6          | none      | MPA           | OPENBABEL | QM  | 0.901 | 0.282 | 0.206          | 0.297 | 96.6  | 82          |
| QM                      | PM6          | none      | MPA           | BALLOON   | QM  | 0.895 | 0.291 | 0.224          | 0.306 | 90.1  | 82          |
| QM                      | PM6          | none      | MPA           | RDKIT     | MM  | 0.895 | 0.291 | 0.199          | 0.307 | 89.9  | 82          |
| QM                      | PM6          | none      | MPA           | FROG2     | NO  | 0.886 | 0.303 | 0.209          | 0.319 | 82.1  | 82          |
| QM                      | PM6          | none      | MPA           | BALLOON   | MM  | 0.877 | 0.315 | 0.241          | 0.332 | 75.4  | 82          |
| Gasteiger               |              |           |               | NCI       | NO  | 0.870 | 0.323 | 0.230          | 0.340 | 71.0  | 82          |
| QM                      | PM6          | none      | MPA           | RDKIT     | MM  | 0.863 | 0.332 | 0.252          | 0.350 | 66.7  | 82          |
| QM                      | PM6          | none      | MPA           | BALLOON   | NO  | 0.854 | 0.343 | 0.257          | 0.361 | 62.0  | 82          |
| QM                      | PM6          | none      | MPA           | RDKIT     | NO  | 0.839 | 0.360 | 0.269          | 0.379 | 55.3  | 82          |
| QM                      | PM6          | none      | MPA           | RDKIT     | QM  | 0.838 | 0.361 | 0.238          | 0.380 | 54.8  | 82          |

Table S3b: Quality and statistical criteria of PM6 and Gasteiger QSPR models.

| Charges         | Theory level | Basis set | Charge scheme | 3D source | Opt | $R^2$ | RMSE  | $\bar{\Delta}$ | $s$   | $F$   | # molecules |
|-----------------|--------------|-----------|---------------|-----------|-----|-------|-------|----------------|-------|-------|-------------|
| <b>Anilines</b> |              |           |               |           |     |       |       |                |       |       |             |
| QM              | PM6          | none      | MPA           | RDKit     | MM  | 0.970 | 0.383 | 0.311          | 0.420 | 184.5 | 48          |
| QM              | PM6          | none      | MPA           | NCI       | NO  | 0.966 | 0.410 | 0.308          | 0.449 | 160.6 | 48          |
| QM              | PM6          | none      | MPA           | OPENBABEL | NO  | 0.964 | 0.421 | 0.315          | 0.462 | 151.6 | 48          |
| QM              | PM6          | none      | MPA           | FROG2     | MM  | 0.961 | 0.436 | 0.328          | 0.477 | 141.5 | 48          |
| QM              | PM6          | none      | MPA           | RDKit     | MM  | 0.957 | 0.458 | 0.338          | 0.502 | 127.5 | 48          |
| QM              | PM6          | none      | MPA           | OPENBABEL | MM  | 0.957 | 0.459 | 0.338          | 0.503 | 126.9 | 48          |
| QM              | PM6          | none      | MPA           | NCI       | MM  | 0.956 | 0.466 | 0.343          | 0.511 | 122.8 | 48          |
| QM              | PM6          | none      | MPA           | PUBCHEM   | MM  | 0.955 | 0.470 | 0.371          | 0.515 | 120.5 | 48          |
| QM              | PM6          | none      | MPA           | PUBCHEM   | NO  | 0.952 | 0.485 | 0.365          | 0.531 | 113.3 | 48          |
| QM              | PM6          | none      | MPA           | NCI       | QM  | 0.940 | 0.541 | 0.434          | 0.592 | 89.8  | 48          |
| QM              | PM6          | none      | MPA           | BALLOON   | MM  | 0.935 | 0.565 | 0.446          | 0.619 | 81.7  | 48          |
| QM              | PM6          | none      | MPA           | BALLOON   | QM  | 0.933 | 0.573 | 0.465          | 0.628 | 79.3  | 48          |
| QM              | PM6          | none      | MPA           | RDKit     | QM  | 0.930 | 0.584 | 0.459          | 0.640 | 76.1  | 48          |
| QM              | PM6          | none      | MPA           | FROG2     | NO  | 0.919 | 0.631 | 0.517          | 0.691 | 64.5  | 48          |
| QM              | PM6          | none      | MPA           | BALLOON   | NO  | 0.896 | 0.712 | 0.553          | 0.780 | 49.3  | 48          |
| QM              | PM6          | none      | MPA           | FROG2     | QM  | 0.890 | 0.732 | 0.599          | 0.802 | 46.4  | 48          |
| QM              | PM6          | none      | MPA           | OPENBABEL | QM  | 0.887 | 0.745 | 0.615          | 0.816 | 44.7  | 48          |
| QM              | PM6          | none      | MPA           | PUBCHEM   | QM  | 0.884 | 0.753 | 0.643          | 0.824 | 43.6  | 48          |
| QM              | PM6          | none      | MPA           | RDKit     | NO  | 0.883 | 0.757 | 0.617          | 0.830 | 43.0  | 48          |
| Gasteiger       |              |           |               | NCI       | NO  | 0.737 | 1.135 | 0.882          | 1.243 | 16.0  | 48          |

## 4 Parameters of All the QSPR Models

Table S4: Parameters of all the QSPR models.

| Charges        | Theory level | Basis set | Charge scheme | 3D source | Opt | $p_p(H)$ | $p_p(O)$ | $p_p(C1)$ | $p_p(OD)$ | $p_p(C1D)$ |  |  | $p_p$   |
|----------------|--------------|-----------|---------------|-----------|-----|----------|----------|-----------|-----------|------------|--|--|---------|
| <b>Phenols</b> |              |           |               |           |     |          |          |           |           |            |  |  |         |
| QM             | B3LYP        | 6-31G*    | AIM           | NCI       | NO  | -148.787 | 68.843   | -10.477   | -26.976   | -0.754     |  |  | 149.809 |
| QM             | B3LYP        | 6-31G*    | MPA           | NCI       | NO  | -212.618 | -28.862  | -4.259    | -1.930    | 0.065      |  |  | 77.872  |
| QM             | HF           | STO-3G    | MPA           | FROG2     | QM  | -21.823  | -62.667  | -47.245   | -28.557   | 40.602     |  |  | -14.151 |
| QM             | HF           | STO-3G    | MPA           | FROG2     | MM  | -30.731  | -63.859  | 16.886    | -23.696   | -101.353   |  |  | -8.707  |
| QM             | B3LYP        | 6-31G*    | MPA           | OPENBABEL | MM  | -103.783 | -104.319 | -14.560   | -2.069    | 7.720      |  |  | -14.786 |
| QM             | B3LYP        | 6-31G*    | MPA           | FROG2     | QM  | -37.001  | -66.864  | 14.857    | -15.398   | -25.517    |  |  | -25.108 |
| QM             | HF           | STO-3G    | MPA           | PUBCHEM   | MM  | -38.342  | -62.320  | 57.674    | -26.794   | -132.738   |  |  | -11.247 |
| QM             | B3LYP        | 6-31G*    | MPA           | NCI       | MM  | -105.820 | -96.301  | -16.648   | 1.526     | 10.636     |  |  | -6.402  |
| QM             | B3LYP        | 6-31G*    | AIM           | OPENBABEL | NO  | 83.264   | 21.740   | -24.031   | -60.302   | -1.647     |  |  | -66.798 |
| QM             | B3LYP        | 6-31G*    | AIM           | OPENBABEL | MM  | 95.924   | 35.781   | -26.873   | -65.038   | -1.726     |  |  | -62.081 |
| QM             | B3LYP        | 6-31G*    | MPA           | RDKit     | MM  | -125.649 | -44.555  | -4.963    | -3.138    | -5.772     |  |  | 32.786  |
| QM             | B3LYP        | 6-31G*    | MPA           | OPENBABEL | NO  | -103.097 | -106.986 | -13.888   | -0.754    | 9.640      |  |  | -16.777 |
| QM             | HF           | STO-3G    | MPA           | OPENBABEL | MM  | -87.846  | -117.111 | -36.778   | -5.239    | 31.317     |  |  | -6.034  |
| QM             | B3LYP        | 6-31G*    | NPA           | NCI       | NO  | -271.174 | -10.215  | 6.658     | -2.460    | -1.264     |  |  | 132.277 |
| QM             | HF           | STO-3G    | MPA           | PUBCHEM   | NO  | -70.040  | -66.021  | 46.409    | -10.727   | -124.864   |  |  | 3.225   |
| QM             | B3LYP        | 6-31G*    | NPA           | NCI       | MM  | -86.729  | -110.154 | -15.759   | 0.344     | 6.234      |  |  | -20.270 |
| QM             | B3LYP        | 6-31G*    | NPA           | OPENBABEL | MM  | -89.133  | -131.188 | 22.596    | -7.861    | -26.821    |  |  | -41.844 |
| QM             | HF           | STO-3G    | MPA           | NCI       | MM  | -85.423  | -102.591 | -37.305   | 0.186     | 9.856      |  |  | 1.870   |
| QM             | B3LYP        | 6-31G*    | NPA           | OPENBABEL | NO  | -92.101  | -123.490 | 31.884    | -9.493    | -39.782    |  |  | -35.224 |
| QM             | B3LYP        | 6-31G*    | MPA           | OPENBABEL | QM  | -67.377  | -65.870  | 11.925    | -6.980    | -19.699    |  |  | -6.837  |
| QM             | B3LYP        | 6-31G*    | NPA           | OPENBABEL | QM  | -58.363  | -77.501  | -2.200    | -3.421    | -7.216     |  |  | -14.608 |
| QM             | HF           | STO-3G    | MPA           | OPENBABEL | QM  | -70.181  | -80.662  | -25.938   | -0.904    | 2.225      |  |  | 3.797   |
| QM             | HF           | STO-3G    | MPA           | OPENBABEL | NO  | -89.505  | -110.242 | -28.521   | -4.158    | 18.624     |  |  | -3.343  |
| QM             | B3LYP        | 6-31G*    | NPA           | FROG2     | QM  | -5.351   | -57.571  | -28.143   | -14.138   | 26.275     |  |  | -37.857 |
| QM             | B3LYP        | 6-31G*    | MPA           | PUBCHEM   | NO  | -111.673 | -59.263  | 6.787     | -7.572    | -18.105    |  |  | 16.138  |
| QM             | B3LYP        | 6-31G*    | AIM           | RDKit     | MM  | 122.260  | 66.246   | -31.978   | -72.701   | -6.094     |  |  | -46.037 |
| QM             | HF           | STO-3G    | MPA           | RDKit     | MM  | -112.226 | -71.568  | -1.220    | -0.625    | -7.487     |  |  | 11.678  |
| QM             | HF           | STO-3G    | MPA           | NCI       | NO  | -223.333 | 24.787   | 7.600     | -1.588    | 2.175      |  |  | 62.803  |
| QM             | B3LYP        | 6-31G*    | MPA           | RDKit     | QM  | -84.725  | -55.804  | -3.945    | -1.456    | -4.317     |  |  | 10.318  |
| QM             | HF           | STO-3G    | MPA           | PUBCHEM   | QM  | -24.268  | -50.702  | 19.498    | -8.200    | -102.028   |  |  | 0.966   |
| QM             | B3LYP        | 6-31G*    | NPA           | RDKit     | MM  | -103.106 | -72.983  | 5.749     | -2.007    | -6.895     |  |  | 7.951   |
| QM             | B3LYP        | 6-31G*    | AIM           | FROG2     | QM  | 115.517  | 54.440   | -77.818   | -41.569   | 33.841     |  |  | -23.165 |
| QM             | B3LYP        | 6-31G*    | MPA           | BALLOON   | NO  | -171.013 | -76.436  | 4.578     | -4.739    | -11.853    |  |  | 29.419  |
| QM             | B3LYP        | 6-31G*    | AIM           | FROG2     | MM  | 139.639  | 84.256   | -63.845   | -65.586   | 11.621     |  |  | -22.878 |
| QM             | B3LYP        | 6-31G*    | MPA           | PUBCHEM   | QM  | -77.851  | -71.872  | 24.297    | -5.541    | -35.123    |  |  | -3.570  |
| QM             | B3LYP        | 6-31G*    | AIM           | OPENBABEL | QM  | 67.992   | 49.051   | -25.490   | -54.499   | -0.354     |  |  | -21.343 |
| QM             | B3LYP        | 6-31G*    | AIM           | NCI       | MM  | 83.578   | 29.363   | -25.529   | -58.992   | -4.545     |  |  | -54.240 |
| QM             | HF           | STO-3G    | MPA           | RDKit     | QM  | -81.474  | -80.312  | -5.710    | 0.338     | -10.099    |  |  | 5.089   |

Table S4: Parameters of all the QSPR models.

|                |       |        |     |           |    |          |           |          |          |          |  |          |
|----------------|-------|--------|-----|-----------|----|----------|-----------|----------|----------|----------|--|----------|
| QM             | B3LYP | 6-31G* | NPA | PUBCHEM   | NO | -109.690 | -95.493   | 40.990   | -5.110   | -54.720  |  | -1.689   |
| QM             | B3LYP | 6-31G* | MPA | NCI       | QM | -60.782  | -70.142   | 29.203   | -11.332  | -36.757  |  | -14.840  |
| QM             | B3LYP | 6-31G* | NPA | RDKit     | MM | -102.447 | -129.536  | 40.266   | -7.931   | -45.275  |  | -34.065  |
| QM             | B3LYP | 6-31G* | AIM | RDKit     | MM | -19.859  | 19.162    | -20.307  | -26.553  | 1.554    |  | 22.624   |
| QM             | B3LYP | 6-31G* | NPA | BALLOON   | MM | -115.680 | -142.865  | 85.866   | -13.893  | -90.101  |  | -41.765  |
| QM             | B3LYP | 6-31G* | NPA | RDKit     | QM | -82.642  | -72.231   | 3.719    | -1.906   | -7.988   |  | 0.311    |
| QM             | B3LYP | 6-31G* | MPA | FROG2     | MM | -75.478  | -77.263   | 10.052   | -20.448  | -23.115  |  | -19.327  |
| QM             | HF    | STO-3G | MPA | RDKit     | MM | -100.858 | -135.117  | -4.162   | -0.416   | -7.724   |  | -7.803   |
| QM             | B3LYP | 6-31G* | NPA | PUBCHEM   | MM | -147.206 | -153.802  | 100.280  | -6.236   | -118.989 |  | -23.000  |
| Chavez2006     | B3LYP | 6-31G* | MPA | NCI       | MM | -461.096 | 700.773   | -134.395 | -204.816 | 66.752   |  | 220.716  |
| Bult2002-npa   | B3LYP | 6-31G* | NPA | NCI       | MM | -144.230 | 846.774   | -253.680 | -261.328 | 107.702  |  | 350.811  |
| Bult2002-npa   | B3LYP | 6-31G* | NPA | PUBCHEM   | QM | 124.590  | -1400.682 | 550.853  | 1313.910 | -671.286 |  | -93.804  |
| Bult2002-npa   | B3LYP | 6-31G* | NPA | NCI       | QM | -145.995 | 519.502   | -87.007  | -36.928  | -12.134  |  | 300.063  |
| Chavez2006     | B3LYP | 6-31G* | MPA | NCI       | QM | -447.837 | 306.349   | 31.932   | 174.440  | -100.320 |  | 213.690  |
| Svob2007-chal2 | HF    | STO-3G | MPA | RDKit     | MM | -69.845  | -32.771   | 58.986   | 11.220   | -79.442  |  | 13.381   |
| QM             | B3LYP | 6-31G* | AIM | RDKit     | QM | 43.042   | 41.942    | -24.286  | -39.425  | -1.815   |  | 1.920    |
| QM             | B3LYP | 6-31G* | NPA | PUBCHEM   | QM | -91.780  | -107.495  | 16.448   | 11.028   | -30.183  |  | -5.981   |
| Chavez2006     | B3LYP | 6-31G* | MPA | PUBCHEM   | QM | 356.912  | -479.552  | 75.427   | 115.060  | -80.851  |  | -152.080 |
| Svob2007-chal2 | HF    | STO-3G | MPA | FROG2     | QM | 14.166   | -61.594   | -18.597  | -25.249  | -18.474  |  | -18.604  |
| Chavez2006     | B3LYP | 6-31G* | MPA | OPENBABEL | NO | -253.000 | 715.206   | -210.017 | -714.287 | 275.413  |  | 36.343   |
| Chavez2006     | B3LYP | 6-31G* | MPA | OPENBABEL | MM | -259.120 | 457.715   | -96.286  | -471.948 | 168.525  |  | 31.707   |
| Chavez2006     | B3LYP | 6-31G* | MPA | RDKit     | QM | -275.211 | 99.730    | 66.422   | -80.041  | -5.010   |  | 43.778   |
| Chavez2006     | B3LYP | 6-31G* | MPA | PUBCHEM   | NO | 339.748  | -106.506  | -76.055  | -441.879 | 158.548  |  | -209.101 |
| Svob2007-chal2 | HF    | STO-3G | MPA | FROG2     | MM | 19.192   | -70.789   | -17.695  | -26.224  | -19.078  |  | -22.958  |
| Bult2002-npa   | B3LYP | 6-31G* | NPA | FROG2     | QM | 56.508   | -135.015  | 38.610   | -54.993  | -32.155  |  | -111.688 |
| Bult2002-npa   | B3LYP | 6-31G* | NPA | FROG2     | MM | 57.554   | -68.508   | 4.927    | -53.309  | -31.371  |  | -78.904  |
| Chavez2006     | B3LYP | 6-31G* | MPA | PUBCHEM   | MM | 354.446  | -211.338  | -34.468  | -341.877 | 112.440  |  | -212.692 |
| Chavez2006     | B3LYP | 6-31G* | MPA | OPENBABEL | QM | -232.034 | 167.968   | 18.275   | -37.203  | -20.224  |  | 75.014   |
| QM             | HF    | STO-3G | MPA | BALLOON   | MM | -120.968 | -152.436  | 35.948   | 1.565    | -33.333  |  | -11.185  |
| Chavez2006     | B3LYP | 6-31G* | MPA | RDKit     | MM | -362.928 | 76.150    | 112.340  | 11.735   | -48.146  |  | 75.306   |
| Bult2002-npa   | B3LYP | 6-31G* | NPA | RDKit     | QM | -82.963  | 263.193   | -5.276   | -105.409 | -6.583   |  | 115.221  |
| Bult2004-aim   | B3LYP | 6-31G* | AIM | NCI       | MM | -269.919 | 692.866   | -282.118 | -373.247 | 207.394  |  | 302.644  |
| QM             | HF    | STO-3G | MPA | BALLOON   | QM | -71.164  | -87.875   | -16.229  | 0.779    | -14.185  |  | 2.502    |
| Bult2002-npa   | B3LYP | 6-31G* | NPA | PUBCHEM   | MM | 107.804  | -794.854  | 292.060  | 737.901  | -403.201 |  | -70.239  |
| Bult2002-npa   | B3LYP | 6-31G* | NPA | PUBCHEM   | NO | 108.035  | -318.110  | 67.415   | 128.884  | -108.941 |  | -131.684 |
| QM             | B3LYP | 6-31G* | MPA | FROG2     | NO | -78.577  | 35.244    | 15.820   | -32.257  | -41.695  |  | 52.731   |
| Bult2002-npa   | B3LYP | 6-31G* | NPA | RDKit     | MM | -101.269 | 302.779   | -1.312   | -91.909  | -17.411  |  | 147.971  |
| Bult2002-npa   | B3LYP | 6-31G* | NPA | OPENBABEL | NO | -72.190  | 550.466   | -161.357 | -272.956 | 84.728   |  | 170.227  |
| Bult2004-aim   | B3LYP | 6-31G* | AIM | NCI       | QM | -262.634 | 520.157   | -180.308 | -238.688 | 123.835  |  | 268.308  |
| Bult2002-npa   | B3LYP | 6-31G* | NPA | OPENBABEL | MM | -73.524  | 487.708   | -129.088 | -225.764 | 60.429   |  | 162.914  |
| Bult2002-npa   | B3LYP | 6-31G* | NPA | OPENBABEL | QM | -66.598  | 380.949   | -84.488  | -114.313 | 5.141    |  | 161.771  |
| QM             | B3LYP | 6-31G* | MPA | PUBCHEM   | MM | -16.222  | 10.482    | 10.517   | -55.906  | -28.505  |  | -12.354  |
| QM             | B3LYP | 6-31G* | MPA | RDKit     | MM | -109.982 | -109.751  | -12.187  | -1.154   | 4.897    |  | -14.805  |
| Svob2007-chal2 | HF    | STO-3G | MPA | RDKit     | QM | -46.608  | -35.167   | 30.617   | 1.549    | -56.191  |  | 7.526    |
| Chavez2006     | B3LYP | 6-31G* | MPA | RDKit     | MM | 133.070  | -208.203  | 49.191   | 132.252  | -98.406  |  | -34.083  |



Table S4: Parameters of all the QSPR models.

|                |       |        |     |           |    |          |          |           |           |          |  |          |
|----------------|-------|--------|-----|-----------|----|----------|----------|-----------|-----------|----------|--|----------|
| Chavez2006     | B3LYP | 6-31G* | MPA | BALLOON   | QM | -49.378  | -192.982 | 109.881   | 569.899   | -286.723 |  | 132.875  |
| Bult2004-aim   | B3LYP | 6-31G* | AIM | OPENBABEL | NO | -144.561 | 521.731  | -221.815  | -477.089  | 250.547  |  | 52.384   |
| QM             | B3LYP | 6-31G* | NPA | BALLOON   | NO | -153.575 | -74.399  | 61.802    | -20.659   | -79.278  |  | 22.351   |
| Svob2007-chal2 | HF    | STO-3G | MPA | FROG2     | NO | 13.948   | -67.394  | -5.278    | -17.375   | -40.767  |  | -21.428  |
| Bult2004-aim   | B3LYP | 6-31G* | AIM | OPENBABEL | MM | -149.261 | 462.545  | -183.959  | -427.840  | 220.372  |  | 43.614   |
| Bult2002-npa   | B3LYP | 6-31G* | NPA | BALLOON   | MM | -40.263  | 508.819  | -172.480  | -189.104  | 43.265   |  | 177.326  |
| QM             | B3LYP | 6-31G* | NPA | FROG2     | MM | -79.711  | -94.717  | 20.086    | -11.296   | -38.277  |  | -19.480  |
| Chavez2006     | B3LYP | 6-31G* | MPA | RDKIT     | NO | -236.467 | 489.838  | -112.179  | -302.672  | 88.025   |  | 93.191   |
| Chavez2006     | B3LYP | 6-31G* | MPA | FROG2     | QM | 105.948  | -62.566  | -17.524   | -21.981   | -21.835  |  | -33.035  |
| Chavez2006     | B3LYP | 6-31G* | MPA | BALLOON   | MM | -89.088  | 145.304  | -21.204   | 110.703   | -87.250  |  | 98.862   |
| Chavez2006     | B3LYP | 6-31G* | MPA | FROG2     | MM | 95.920   | 45.640   | -60.100   | -21.522   | -21.626  |  | 3.306    |
| QM             | B3LYP | 6-31G* | NPA | FROG2     | NO | -20.406  | -47.799  | -5.355    | -17.272   | 20.161   |  | -29.421  |
| Svob2007-chal2 | HF    | STO-3G | MPA | NCI       | NO | -131.519 | 9.741    | 87.963    | 13.989    | -98.898  |  | 38.947   |
| Bult2002-npa   | B3LYP | 6-31G* | NPA | BALLOON   | QM | -32.549  | 350.628  | -104.467  | -17.418   | -41.135  |  | 179.829  |
| Chavez2006     | B3LYP | 6-31G* | MPA | NCI       | NO | 505.873  | -483.235 | 29.086    | -19.425   | -31.140  |  | -214.367 |
| Chavez2006     | B3LYP | 6-31G* | MPA | BALLOON   | NO | 11.492   | -40.804  | 23.403    | 248.205   | -148.852 |  | 71.358   |
| Bult2002-npa   | B3LYP | 6-31G* | NPA | RDKIT     | NO | -48.590  | 617.610  | -206.640  | -356.892  | 114.202  |  | 151.787  |
| Bult2004-aim   | B3LYP | 6-31G* | AIM | OPENBABEL | QM | -137.326 | 460.765  | -188.830  | -372.399  | 187.373  |  | 91.368   |
| QM             | B3LYP | 6-31G* | AIM | BALLOON   | NO | -15.842  | 1.709    | -4.880    | -45.767   | -7.163   |  | -23.369  |
| Bult2002-npa   | B3LYP | 6-31G* | NPA | BALLOON   | NO | -0.017   | 562.916  | -235.927  | -267.591  | 79.222   |  | 149.359  |
| QM             | B3LYP | 6-31G* | AIM | NCI       | QM | 56.507   | 31.520   | -38.763   | -21.031   | -1.522   |  | 10.579   |
| Bult2002-npa   | B3LYP | 6-31G* | NPA | RDKIT     | MM | 41.117   | 177.103  | -92.390   | -105.693  | -2.983   |  | 22.773   |
| Bult2004-aim   | B3LYP | 6-31G* | AIM | PUBCHEM   | NO | 213.795  | 545.438  | -407.952  | -908.523  | 517.172  |  | -321.324 |
| QM             | B3LYP | 6-31G* | NPA | BALLOON   | QM | -74.855  | -66.199  | 9.797     | -5.085    | -24.144  |  | 1.419    |
| QM             | B3LYP | 6-31G* | AIM | PUBCHEM   | NO | -14.018  | -18.018  | 30.228    | -34.378   | -41.552  |  | -28.816  |
| Svob2007-chal2 | HF    | STO-3G | MPA | OPENBABEL | MM | -26.281  | -30.298  | -5.367    | -21.256   | -15.446  |  | -1.036   |
| Svob2007-chal2 | HF    | STO-3G | MPA | OPENBABEL | NO | -26.365  | -24.879  | -14.064   | -25.134   | -5.365   |  | -0.258   |
| Bult2002-npa   | B3LYP | 6-31G* | NPA | NCI       | NO | 145.328  | 31.145   | -132.190  | -197.174  | 46.107   |  | -134.355 |
| Svob2007-chal2 | HF    | STO-3G | MPA | RDKIT     | MM | -2.995   | -85.799  | 34.834    | -0.210    | -59.981  |  | -18.297  |
| Bult2004-aim   | B3LYP | 6-31G* | AIM | PUBCHEM   | QM | 205.170  | -86.819  | -25.228   | -51.657   | -1.786   |  | -119.977 |
| Bult2004-aim   | B3LYP | 6-31G* | AIM | PUBCHEM   | MM | 233.713  | 312.462  | -274.707  | -700.103  | 387.131  |  | -343.943 |
| Svob2007-chal2 | HF    | STO-3G | MPA | PUBCHEM   | QM | 35.743   | 6.518    | -121.772  | -81.297   | 94.113   |  | -14.837  |
| Bult2002-npa   | B3LYP | 6-31G* | NPA | FROG2     | NO | -0.756   | 705.294  | -338.256  | 58.724    | -42.436  |  | 368.762  |
| Chavez2006     | B3LYP | 6-31G* | MPA | FROG2     | NO | -69.572  | 2452.333 | -1021.007 | -1094.902 | 637.732  |  | 612.658  |
| Svob2007-chal2 | HF    | STO-3G | MPA | OPENBABEL | QM | -35.513  | -67.554  | 58.448    | 15.328    | -85.335  |  | -1.802   |
| QM             | HF    | STO-3G | MPA | BALLOON   | NO | -146.790 | -27.059  | 1.069     | -0.137    | -38.249  |  | 34.576   |
| Svob2007-chal2 | HF    | STO-3G | MPA | PUBCHEM   | NO | 5.210    | -51.959  | -12.745   | -21.405   | -15.646  |  | -13.231  |
| Svob2007-chal2 | HF    | STO-3G | MPA | NCI       | QM | -44.510  | -42.602  | 51.711    | 13.154    | -79.865  |  | 7.955    |
| Bult2004-aim   | B3LYP | 6-31G* | AIM | RDKIT     | QM | -111.463 | 393.171  | -157.145  | -324.003  | 154.908  |  | 73.288   |
| QM             | B3LYP | 6-31G* | MPA | RDKIT     | NO | -120.552 | -50.198  | 3.371     | -4.380    | -15.781  |  | 24.970   |
| Bult2004-aim   | B3LYP | 6-31G* | AIM | RDKIT     | MM | -147.073 | 444.660  | -168.494  | -421.586  | 211.069  |  | 32.631   |
| QM             | HF    | STO-3G | MPA | FROG2     | NO | -150.874 | -149.488 | 33.849    | 4.674     | 58.823   |  | -7.628   |
| Svob2007-chal2 | HF    | STO-3G | MPA | RDKIT     | NO | -70.040  | -29.439  | 50.517    | 4.048     | -64.316  |  | 11.794   |
| Bult2004-aim   | B3LYP | 6-31G* | AIM | RDKIT     | MM | 102.366  | 329.596  | -215.463  | -444.923  | 223.967  |  | -97.502  |
| QM             | B3LYP | 6-31G* | AIM | BALLOON   | MM | 56.693   | 6.631    | -2.098    | -58.586   | -5.880   |  | -75.581  |

Table S4: Parameters of all the QSPR models.

|                |       |        |     |           |    |          |          |          |          |          |  |          |
|----------------|-------|--------|-----|-----------|----|----------|----------|----------|----------|----------|--|----------|
| QM             | HF    | STO-3G | MPA | NCI       | QM | -46.474  | -9.843   | -41.622  | -0.158   | 3.429    |  | 21.667   |
| Svob2007-chal2 | HF    | STO-3G | MPA | NCI       | MM | -46.311  | -22.777  | 17.016   | -2.318   | -43.028  |  | 11.100   |
| QM             | B3LYP | 6-31G* | AIM | FROG2     | NO | -33.636  | -57.726  | -13.680  | -14.946  | 40.748   |  | -81.607  |
| Bult2004-aim   | B3LYP | 6-31G* | AIM | BALLOON   | QM | -5.072   | 736.921  | -413.574 | -452.815 | 235.587  |  | 262.923  |
| Bult2004-aim   | B3LYP | 6-31G* | AIM | NCI       | NO | 411.717  | 92.415   | -222.626 | -415.159 | 211.456  |  | -290.789 |
| Bult2004-aim   | B3LYP | 6-31G* | AIM | BALLOON   | NO | 34.098   | 711.344  | -412.412 | -547.202 | 287.919  |  | 154.271  |
| Svob2007-chal2 | HF    | STO-3G | MPA | PUBCHEM   | MM | 28.288   | -9.806   | -71.546  | -64.340  | 38.195   |  | -14.907  |
| QM             | B3LYP | 6-31G* | AIM | PUBCHEM   | QM | 94.460   | 65.279   | -26.084  | -48.024  | -10.254  |  | -4.224   |
| Bult2004-aim   | B3LYP | 6-31G* | AIM | RDKit     | NO | -36.588  | 467.582  | -230.403 | -437.911 | 217.119  |  | 35.413   |
| Bult2004-aim   | B3LYP | 6-31G* | AIM | BALLOON   | MM | -26.241  | 501.270  | -257.676 | -414.549 | 205.931  |  | 86.550   |
| QM             | B3LYP | 6-31G* | AIM | RDKit     | NO | -39.183  | -9.365   | -15.037  | -19.334  | -2.480   |  | 9.293    |
| QM             | B3LYP | 6-31G* | MPA | BALLOON   | MM | -116.862 | -52.018  | -35.410  | 6.166    | 25.786   |  | 30.613   |
| Svob2007-chal2 | HF    | STO-3G | MPA | BALLOON   | NO | -45.644  | -71.032  | 69.436   | 17.654   | -93.891  |  | -0.920   |
| QM             | B3LYP | 6-31G* | MPA | BALLOON   | QM | -81.952  | -55.494  | 5.110    | -4.388   | -13.926  |  | 7.701    |
| Svob2007-chal2 | HF    | STO-3G | MPA | BALLOON   | QM | -35.008  | -66.742  | 73.235   | 17.670   | -109.681 |  | -0.780   |
| Bult2004-aim   | B3LYP | 6-31G* | AIM | FROG2     | QM | 21.044   | 71.373   | -51.453  | -12.907  | -11.944  |  | 62.298   |
| Bult2004-aim   | B3LYP | 6-31G* | AIM | FROG2     | MM | 19.946   | 3.541    | -10.366  | -13.301  | -12.365  |  | 1.305    |
| QM             | B3LYP | 6-31G* | AIM | PUBCHEM   | MM | 40.555   | 61.890   | 75.862   | -86.436  | -97.222  |  | -15.713  |
| QM             | B3LYP | 6-31G* | NPA | NCI       | QM | -92.378  | -10.831  | -9.001   | -4.633   | -9.171   |  | 49.772   |
| Bult2004-aim   | B3LYP | 6-31G* | AIM | FROG2     | NO | -65.694  | 254.164  | -129.134 | 462.243  | -326.119 |  | 457.007  |
| QM             | B3LYP | 6-31G* | AIM | BALLOON   | QM | -6.390   | 0.618    | -5.616   | -44.303  | -5.116   |  | -29.087  |
| Svob2007-chal2 | HF    | STO-3G | MPA | BALLOON   | MM | -32.314  | -52.090  | 46.248   | -0.274   | -70.197  |  | -2.202   |
| QM             | B3LYP | 6-31G* | NPA | RDKit     | NO | -111.075 | -23.794  | 20.978   | -15.553  | -31.792  |  | 38.192   |
| QM             | HF    | STO-3G | MPA | RDKit     | NO | -84.867  | -46.827  | -35.345  | -1.363   | -6.946   |  | 15.247   |
| QM             | PM6   | none   | MPA | NCI       | MM | -45.470  | -74.491  | -8.415   | 3.523    | 4.298    |  | -6.504   |
| QM             | PM6   | none   | MPA | FROG2     | QM | 36.116   | -4.446   | -13.485  | -25.682  | 17.317   |  | -29.776  |
| QM             | PM6   | none   | MPA | OPENBABEL | MM | -46.711  | -80.412  | -10.101  | 4.347    | 9.883    |  | -10.552  |
| QM             | PM6   | none   | MPA | RDKit     | MM | -94.613  | -43.921  | -1.313   | -0.668   | -0.620   |  | 19.898   |
| QM             | PM6   | none   | MPA | OPENBABEL | QM | -32.757  | -51.170  | -2.562   | 0.009    | -0.508   |  | -1.997   |
| QM             | PM6   | none   | MPA | NCI       | NO | -253.670 | -8.884   | 7.869    | -1.377   | -1.076   |  | 86.978   |
| QM             | PM6   | none   | MPA | OPENBABEL | NO | -49.592  | -76.423  | -7.619   | 2.507    | 6.409    |  | -8.263   |
| QM             | PM6   | none   | MPA | FROG2     | MM | 45.864   | 4.257    | -8.954   | -37.790  | 9.149    |  | -35.922  |
| QM             | PM6   | none   | MPA | RDKit     | QM | -45.797  | -46.260  | -1.294   | -0.164   | -0.973   |  | 4.117    |
| QM             | PM6   | none   | MPA | FROG2     | NO | 0.777    | -23.982  | -8.733   | -8.078   | 16.825   |  | -12.464  |
| QM             | PM6   | none   | MPA | PUBCHEM   | NO | -21.179  | -20.006  | -6.193   | -15.516  | 4.364    |  | -5.500   |
| QM             | PM6   | none   | MPA | RDKit     | MM | -47.585  | -78.692  | -2.699   | 0.058    | 0.135    |  | -10.154  |
| QM             | PM6   | none   | MPA | PUBCHEM   | QM | 37.749   | 5.788    | -14.959  | -29.451  | 18.644   |  | -28.956  |
| QM             | PM6   | none   | MPA | PUBCHEM   | MM | 14.188   | 12.155   | 0.974    | -41.664  | -7.919   |  | -19.488  |
| QM             | PM6   | none   | MPA | BALLOON   | NO | -132.186 | -42.520  | 3.406    | -6.331   | -9.562   |  | 31.078   |
| QM             | PM6   | none   | MPA | BALLOON   | MM | -82.824  | -52.984  | 1.569    | -2.330   | -4.766   |  | 12.026   |
| QM             | PM6   | none   | MPA | BALLOON   | QM | -47.875  | -43.797  | -3.599   | 0.655    | -0.440   |  | 6.877    |
| QM             | PM6   | none   | MPA | NCI       | QM | -69.906  | -18.753  | -2.290   | -1.091   | -1.924   |  | 24.314   |
| QM             | PM6   | none   | MPA | RDKit     | NO | -99.028  | -38.700  | 1.483    | -6.131   | -6.444   |  | 20.736   |
| Gasteiger      |       |        |     | NCI       | NO | 1.899E5  | -9.651E3 | -68.18   | 15.03    | -22.86   |  | -6.055E4 |

Table S4: Parameters of all the QSPR models.

| Charges                 | Theory level | Basis set | Charge scheme | 3D source | Opt | $p_c(H)$ | $P_c(O1)$ | $P_c(O2)$ | $P_c(C1)$ | $P_c(O1D)$ | $P_c(O2D)$ | $P_c(C1D)$ | $P_c$    |
|-------------------------|--------------|-----------|---------------|-----------|-----|----------|-----------|-----------|-----------|------------|------------|------------|----------|
| <b>Carboxylic acids</b> |              |           |               |           |     |          |           |           |           |            |            |            |          |
| Bult2002-npa            | B3LYP        | 6-31G*    | NPA           | BALLOON   | MM  | 5.660    | -2.024    | 157.129   | -336.189  | 196.873    | -321.673   | 465.338    | 158.572  |
| Bult2002-npa            | B3LYP        | 6-31G*    | NPA           | BALLOON   | NO  | 16.756   | -15.745   | 134.099   | -296.924  | 177.660    | -306.211   | 452.941    | 151.231  |
| Bult2002-npa            | B3LYP        | 6-31G*    | NPA           | BALLOON   | QM  | 5.581    | -92.125   | 217.453   | -376.584  | 275.655    | -395.768   | 545.932    | 172.418  |
| Bult2002-npa            | B3LYP        | 6-31G*    | NPA           | FROG2     | MM  | -71.256  | 297.299   | -37.309   | -68.863   | 217.923    | -156.556   | 106.367    | 301.754  |
| Bult2002-npa            | B3LYP        | 6-31G*    | NPA           | FROG2     | NO  | 52.103   | 145.222   | -127.420  | 14.164    | -80.277    | 47.974     | -28.551    | 7.774    |
| Bult2002-npa            | B3LYP        | 6-31G*    | NPA           | FROG2     | QM  | -29.615  | 298.609   | 2.781     | -240.028  | 54.522     | -154.696   | 265.100    | 200.538  |
| Bult2002-npa            | B3LYP        | 6-31G*    | NPA           | NCI       | MM  | 281.290  | -572.821  | 297.688   | -652.051  | 260.868    | -337.221   | 441.573    | -364.733 |
| Bult2002-npa            | B3LYP        | 6-31G*    | NPA           | NCI       | NO  | 384.857  | -1045.866 | 403.343   | -634.727  | 394.138    | -373.000   | 386.034    | -591.853 |
| Bult2002-npa            | B3LYP        | 6-31G*    | NPA           | NCI       | QM  | 271.499  | -655.080  | 346.878   | -657.069  | 320.758    | -382.698   | 479.087    | -356.223 |
| Bult2002-npa            | B3LYP        | 6-31G*    | NPA           | OPENBABEL | MM  | -19.875  | -23.596   | 43.282    | -22.083   | 214.869    | -195.837   | 179.426    | 180.025  |
| Bult2002-npa            | B3LYP        | 6-31G*    | NPA           | OPENBABEL | NO  | -24.430  | -19.257   | 62.265    | -57.086   | 228.479    | -213.396   | 202.909    | 185.022  |
| Bult2002-npa            | B3LYP        | 6-31G*    | NPA           | OPENBABEL | QM  | -18.604  | -11.637   | 38.813    | -27.948   | 202.049    | -208.670   | 222.239    | 197.261  |
| Bult2002-npa            | B3LYP        | 6-31G*    | NPA           | PUBCHEM   | MM  | 231.010  | -537.009  | 212.549   | -414.190  | 438.007    | -250.992   | 91.782     | -295.340 |
| Bult2002-npa            | B3LYP        | 6-31G*    | NPA           | PUBCHEM   | NO  | 169.464  | -593.786  | 282.774   | -380.137  | 524.463    | -336.352   | 184.233    | -195.178 |
| Bult2002-npa            | B3LYP        | 6-31G*    | NPA           | PUBCHEM   | QM  | 70.174   | -148.480  | -34.996   | 65.015    | 373.519    | -98.035    | -169.031   | 33.618   |
| Bult2002-npa            | B3LYP        | 6-31G*    | NPA           | RDKIT     | MM  | -11.842  | -32.019   | 164.039   | -286.916  | 197.413    | -362.713   | 554.674    | 218.172  |
| Bult2002-npa            | B3LYP        | 6-31G*    | NPA           | RDKIT     | QM  | 4.783    | -137.215  | 186.826   | -266.511  | 198.312    | -386.922   | 607.307    | 196.338  |
| Bult2002-npa            | B3LYP        | 6-31G*    | NPA           | RDKIT     | MM  | -13.714  | 197.151   | 50.092    | -263.108  | 72.628     | -218.285   | 369.971    | 192.626  |
| Bult2002-npa            | B3LYP        | 6-31G*    | NPA           | RDKIT     | NO  | 14.537   | 177.713   | -25.676   | -146.000  | 73.728     | -128.306   | 182.138    | 137.728  |
| Bult2004-aim            | B3LYP        | 6-31G*    | AIM           | BALLOON   | MM  | 33.450   | -15.407   | 68.048    | -117.743  | 122.454    | -256.391   | 296.634    | 263.086  |
| Bult2004-aim            | B3LYP        | 6-31G*    | AIM           | BALLOON   | NO  | 21.090   | -291.803  | 372.571   | -350.008  | 424.276    | -571.082   | 526.908    | 284.840  |
| Bult2004-aim            | B3LYP        | 6-31G*    | AIM           | BALLOON   | QM  | 42.020   | 108.251   | -132.148  | 90.288    | -46.931    | -53.235    | 125.322    | 254.586  |
| Bult2004-aim            | B3LYP        | 6-31G*    | AIM           | FROG2     | MM  | -57.222  | -200.218  | 325.372   | -300.009  | 444.998    | -566.812   | 499.029    | 407.739  |
| Bult2004-aim            | B3LYP        | 6-31G*    | AIM           | FROG2     | NO  | 5.108    | 116.333   | -28.991   | -73.418   | -1.466     | -124.509   | 209.589    | 232.356  |
| Bult2004-aim            | B3LYP        | 6-31G*    | AIM           | FROG2     | QM  | -48.354  | -37.667   | 306.623   | -437.160  | 259.689    | -518.381   | 604.134    | 358.054  |
| Bult2004-aim            | B3LYP        | 6-31G*    | AIM           | NCI       | MM  | 320.851  | -386.207  | 269.070   | -314.266  | 315.021    | -368.453   | 294.710    | -82.901  |
| Bult2004-aim            | B3LYP        | 6-31G*    | AIM           | NCI       | NO  | 56.700   | -608.466  | 259.596   | 125.477   | 813.697    | -472.136   | -29.880    | 276.404  |
| Bult2004-aim            | B3LYP        | 6-31G*    | AIM           | NCI       | QM  | -490.529 | 509.469   | -240.061  | 287.398   | 41.819     | -77.118    | 76.070     | 841.393  |
| Bult2004-aim            | B3LYP        | 6-31G*    | AIM           | OPENBABEL | MM  | 18.490   | -130.668  | 168.828   | -161.957  | 281.513    | -359.678   | 310.746    | 275.787  |
| Bult2004-aim            | B3LYP        | 6-31G*    | AIM           | OPENBABEL | NO  | 20.876   | -72.130   | 88.628    | -86.575   | 212.249    | -274.348   | 236.304    | 266.827  |
| Bult2004-aim            | B3LYP        | 6-31G*    | AIM           | OPENBABEL | QM  | 17.271   | -9.208    | 35.065    | -56.806   | 152.793    | -233.682   | 229.928    | 291.163  |
| Bult2004-aim            | B3LYP        | 6-31G*    | AIM           | PUBCHEM   | MM  | 525.776  | -621.922  | 339.631   | -359.527  | 435.683    | -389.468   | 210.654    | -307.706 |
| Bult2004-aim            | B3LYP        | 6-31G*    | AIM           | PUBCHEM   | NO  | -192.456 | -172.679  | 257.602   | -109.889  | 569.410    | -523.634   | 302.995    | 542.288  |
| Bult2004-aim            | B3LYP        | 6-31G*    | AIM           | PUBCHEM   | QM  | 99.178   | -350.153  | 264.041   | -171.963  | 501.392    | -442.698   | 236.279    | 198.389  |
| Bult2004-aim            | B3LYP        | 6-31G*    | AIM           | RDKIT     | MM  | -8.038   | -124.530  | 141.670   | -103.005  | 236.395    | -335.815   | 317.138    | 299.744  |
| Bult2004-aim            | B3LYP        | 6-31G*    | AIM           | RDKIT     | QM  | 26.707   | 143.207   | -154.681  | 105.585   | -101.911   | -24.682    | 132.211    | 256.795  |
| Bult2004-aim            | B3LYP        | 6-31G*    | AIM           | RDKIT     | MM  | -1.907   | -49.644   | 248.709   | -359.985  | 235.226    | -460.297   | 526.923    | 324.037  |
| Bult2004-aim            | B3LYP        | 6-31G*    | AIM           | RDKIT     | NO  | 40.687   | -56.930   | 166.603   | -247.142  | 217.550    | -346.150   | 350.841    | 242.796  |
| Chavez2006              | B3LYP        | 6-31G*    | MPA           | BALLOON   | MM  | 97.802   | -73.097   | 29.697    | -88.849   | 330.501    | -330.048   | 443.662    | 192.629  |
| Chavez2006              | B3LYP        | 6-31G*    | MPA           | BALLOON   | NO  | 102.315  | -71.675   | 25.438    | -83.452   | 350.724    | -330.692   | 425.608    | 195.139  |
| Chavez2006              | B3LYP        | 6-31G*    | MPA           | BALLOON   | QM  | 105.230  | -102.312  | 4.802     | -6.469    | 319.543    | -309.521   | 408.174    | 193.992  |

Table S4: Parameters of all the QSPR models.

|            |       |        |     |           |    |          |          |          |          |         |          |         |          |
|------------|-------|--------|-----|-----------|----|----------|----------|----------|----------|---------|----------|---------|----------|
| Chavez2006 | B3LYP | 6-31G* | MPA | FROG2     | MM | -155.702 | 359.759  | -129.660 | 76.968   | 269.156 | -176.421 | 141.964 | 298.224  |
| Chavez2006 | B3LYP | 6-31G* | MPA | FROG2     | NO | 182.399  | 107.877  | -77.854  | -88.751  | -13.061 | -106.647 | 263.170 | 71.902   |
| Chavez2006 | B3LYP | 6-31G* | MPA | FROG2     | QM | -10.239  | 205.002  | -59.193  | -63.385  | 222.871 | -192.302 | 227.318 | 198.522  |
| Chavez2006 | B3LYP | 6-31G* | MPA | NCI       | MM | 797.966  | -645.970 | 143.818  | -389.905 | 416.109 | -317.077 | 330.955 | -179.437 |
| Chavez2006 | B3LYP | 6-31G* | MPA | NCI       | NO | 973.543  | -912.196 | 121.033  | -223.582 | 466.071 | -253.415 | 128.282 | -281.567 |
| Chavez2006 | B3LYP | 6-31G* | MPA | NCI       | QM | 1046.615 | -989.275 | 251.934  | -522.494 | 465.808 | -362.644 | 391.639 | -326.545 |
| Chavez2006 | B3LYP | 6-31G* | MPA | OPENBABEL | MM | -11.824  | 76.532   | -27.419  | -6.678   | 297.598 | -281.010 | 358.596 | 241.940  |
| Chavez2006 | B3LYP | 6-31G* | MPA | OPENBABEL | NO | -6.511   | 55.119   | -15.673  | -18.786  | 314.113 | -285.270 | 352.469 | 233.805  |
| Chavez2006 | B3LYP | 6-31G* | MPA | OPENBABEL | QM | 11.990   | 54.410   | -38.133  | 20.770   | 277.029 | -266.802 | 347.733 | 230.859  |
| Chavez2006 | B3LYP | 6-31G* | MPA | PUBCHEM   | MM | 431.222  | -194.415 | -23.571  | -128.762 | 404.974 | -158.834 | -32.918 | -27.905  |
| Chavez2006 | B3LYP | 6-31G* | MPA | PUBCHEM   | NO | 210.716  | -115.170 | -42.881  | 25.732   | 425.662 | -186.223 | 11.559  | 94.111   |
| Chavez2006 | B3LYP | 6-31G* | MPA | PUBCHEM   | QM | 230.822  | -147.474 | -70.606  | 108.663  | 484.734 | -174.832 | -74.257 | 99.564   |
| Chavez2006 | B3LYP | 6-31G* | MPA | RDKIT     | MM | 59.405   | -87.858  | -66.438  | 189.287  | 296.181 | -245.704 | 276.501 | 216.554  |
| Chavez2006 | B3LYP | 6-31G* | MPA | RDKIT     | QM | 87.820   | -116.010 | -15.118  | 70.037   | 245.446 | -297.739 | 455.840 | 207.748  |
| Chavez2006 | B3LYP | 6-31G* | MPA | RDKIT     | MM | 29.791   | 127.863  | -26.555  | -94.264  | 241.802 | -285.918 | 426.688 | 229.687  |
| Chavez2006 | B3LYP | 6-31G* | MPA | RDKIT     | NO | 80.694   | 199.931  | -94.738  | -46.126  | 181.088 | -192.810 | 264.542 | 190.161  |
| QM         | B3LYP | 6-31G* | AIM | BALLOON   | MM | -63.728  | -54.960  | 19.797   | -7.834   | 5.106   | -25.333  | -15.089 | -34.151  |
| QM         | B3LYP | 6-31G* | AIM | BALLOON   | NO | -53.678  | -27.855  | 15.113   | -18.649  | -7.936  | -19.590  | -6.648  | -28.130  |
| QM         | B3LYP | 6-31G* | AIM | BALLOON   | QM | -50.649  | -42.027  | -5.870   | -8.144   | 12.450  | -9.996   | -15.932 | -4.158   |
| QM         | B3LYP | 6-31G* | AIM | FROG2     | MM | -127.169 | -65.856  | 11.145   | 18.069   | 12.412  | -24.925  | -23.447 | 32.238   |
| QM         | B3LYP | 6-31G* | AIM | FROG2     | NO | -82.679  | -30.427  | 7.254    | -20.609  | -0.495  | -11.550  | 3.925   | 5.843    |
| QM         | B3LYP | 6-31G* | AIM | FROG2     | QM | -105.857 | -86.979  | 3.307    | 12.032   | 17.266  | -13.709  | -35.490 | -27.145  |
| QM         | B3LYP | 6-31G* | AIM | NCI       | MM | -78.593  | -36.740  | 0.764    | -13.083  | -1.924  | -6.575   | 2.714   | 3.562    |
| QM         | B3LYP | 6-31G* | AIM | NCI       | NO | -86.975  | -43.130  | -26.823  | 1.452    | 13.184  | 20.702   | -17.666 | 8.932    |
| QM         | B3LYP | 6-31G* | AIM | NCI       | QM | -129.639 | -61.131  | -34.376  | 0.754    | 9.796   | 28.046   | -12.366 | 16.035   |
| QM         | B3LYP | 6-31G* | AIM | OPENBABEL | MM | -61.748  | -47.250  | 28.868   | -8.158   | 3.392   | -33.656  | -18.309 | -34.195  |
| QM         | B3LYP | 6-31G* | AIM | OPENBABEL | NO | -63.491  | -50.684  | 23.299   | -5.149   | 6.487   | -29.610  | -21.490 | -31.740  |
| QM         | B3LYP | 6-31G* | AIM | OPENBABEL | QM | -41.586  | -25.615  | 3.196    | -14.497  | 7.922   | -15.764  | -11.209 | -2.858   |
| QM         | B3LYP | 6-31G* | AIM | PUBCHEM   | MM | -97.131  | -51.887  | -6.701   | 7.003    | 8.999   | -5.810   | -16.618 | 19.432   |
| QM         | B3LYP | 6-31G* | AIM | PUBCHEM   | NO | -98.414  | -55.191  | 10.810   | -9.893   | 8.537   | -11.618  | -14.820 | -20.183  |
| QM         | B3LYP | 6-31G* | AIM | PUBCHEM   | QM | -119.906 | -66.059  | -6.349   | 7.223    | 11.874  | -4.869   | -18.457 | 16.022   |
| QM         | B3LYP | 6-31G* | AIM | RDKIT     | MM | -44.464  | -12.475  | 1.443    | -19.805  | -5.333  | -11.142  | 1.672   | 4.794    |
| QM         | B3LYP | 6-31G* | AIM | RDKIT     | QM | -48.841  | -31.854  | 5.823    | -20.810  | 14.153  | -19.562  | -11.792 | -4.775   |
| QM         | B3LYP | 6-31G* | AIM | RDKIT     | MM | -75.485  | -55.192  | 42.750   | -17.010  | 0.875   | -38.820  | -8.020  | -48.825  |
| QM         | B3LYP | 6-31G* | AIM | RDKIT     | NO | -25.977  | -13.236  | -4.652   | -11.056  | -7.318  | -3.878   | -0.739  | -3.140   |
| QM         | B3LYP | 6-31G* | MPA | BALLOON   | MM | -46.400  | -31.802  | -4.438   | 2.503    | 2.669   | 11.541   | -25.139 | -9.302   |
| QM         | B3LYP | 6-31G* | MPA | BALLOON   | NO | -96.292  | -19.883  | -0.570   | 1.697    | 13.859  | 5.612    | -34.771 | 20.483   |
| QM         | B3LYP | 6-31G* | MPA | BALLOON   | QM | -43.355  | -36.315  | 5.119    | -6.806   | 1.259   | 1.164    | -6.310  | -7.849   |
| QM         | B3LYP | 6-31G* | MPA | FROG2     | MM | -119.729 | -19.233  | -4.210   | 4.794    | 3.423   | 5.183    | -10.825 | 40.700   |
| QM         | B3LYP | 6-31G* | MPA | FROG2     | NO | -94.218  | 11.089   | -22.854  | -24.739  | -10.479 | 20.142   | 7.313   | 38.268   |
| QM         | B3LYP | 6-31G* | MPA | FROG2     | QM | -115.943 | -5.063   | -10.804  | -19.526  | -6.596  | 7.852    | 7.379   | 41.750   |
| QM         | B3LYP | 6-31G* | MPA | NCI       | MM | -89.187  | 2.855    | -11.694  | -19.967  | -12.147 | 12.614   | 12.493  | 32.123   |
| QM         | B3LYP | 6-31G* | MPA | NCI       | NO | -52.264  | 13.735   | -27.043  | -13.591  | -15.165 | 30.800   | -7.089  | 13.501   |
| QM         | B3LYP | 6-31G* | MPA | NCI       | QM | -124.117 | -3.548   | -10.004  | -14.111  | -6.587  | 9.121    | 7.124   | 47.143   |
| QM         | B3LYP | 6-31G* | MPA | OPENBABEL | MM | -52.514  | -23.919  | 1.670    | -0.285   | 6.558   | 8.144    | -21.637 | -0.830   |

Table S4: Parameters of all the QSPR models.

|    |       |        |     |           |    |          |          |          |         |         |         |         |         |
|----|-------|--------|-----|-----------|----|----------|----------|----------|---------|---------|---------|---------|---------|
| QM | B3LYP | 6-31G* | MPA | OPENBABEL | NO | -52.183  | -23.431  | 5.574    | -3.557  | 4.474   | 4.263   | -14.714 | 0.053   |
| QM | B3LYP | 6-31G* | MPA | OPENBABEL | QM | -46.440  | -25.036  | 12.105   | -6.014  | 4.509   | -0.336  | -8.612  | -2.209  |
| QM | B3LYP | 6-31G* | MPA | PUBCHEM   | MM | -114.682 | 13.936   | -18.214  | -15.628 | -11.226 | 17.255  | 13.753  | 53.622  |
| QM | B3LYP | 6-31G* | MPA | PUBCHEM   | NO | -95.030  | 8.563    | -34.354  | -13.939 | -5.522  | 36.531  | -7.886  | 34.667  |
| QM | B3LYP | 6-31G* | MPA | PUBCHEM   | QM | -129.642 | 5.427    | -22.994  | -16.920 | -7.800  | 21.217  | 9.949   | 55.354  |
| QM | B3LYP | 6-31G* | MPA | RDKIT     | MM | -65.422  | 2.671    | -15.796  | -12.105 | -3.099  | 18.621  | -12.547 | 18.058  |
| QM | B3LYP | 6-31G* | MPA | RDKIT     | QM | -46.892  | -25.618  | 5.226    | -1.538  | -0.777  | 5.700   | -3.935  | -0.292  |
| QM | B3LYP | 6-31G* | MPA | RDKIT     | MM | -86.441  | -50.778  | -16.525  | 23.453  | 17.327  | 27.165  | -39.648 | 7.329   |
| QM | B3LYP | 6-31G* | MPA | RDKIT     | NO | -55.620  | -28.947  | -8.915   | -16.143 | 1.805   | 6.243   | -4.712  | 3.022   |
| QM | B3LYP | 6-31G* | NPA | BALLOON   | MM | -50.642  | -34.515  | -12.235  | -8.471  | 6.929   | 21.498  | -28.462 | -20.843 |
| QM | B3LYP | 6-31G* | NPA | BALLOON   | NO | -50.223  | -19.919  | -19.509  | -11.353 | 0.247   | 29.725  | -17.479 | -10.023 |
| QM | B3LYP | 6-31G* | NPA | BALLOON   | QM | -52.115  | -60.544  | -10.926  | 1.259   | 11.710  | 18.279  | -39.955 | -35.932 |
| QM | B3LYP | 6-31G* | NPA | FROG2     | MM | -143.422 | -58.006  | -14.624  | 15.154  | 19.366  | 18.717  | -38.769 | 29.813  |
| QM | B3LYP | 6-31G* | NPA | FROG2     | NO | -136.507 | -38.276  | 8.353    | -39.008 | -1.556  | -16.136 | 15.345  | 37.317  |
| QM | B3LYP | 6-31G* | NPA | FROG2     | QM | -125.013 | -54.043  | -4.554   | -23.164 | 9.657   | -0.574  | -7.486  | 21.012  |
| QM | B3LYP | 6-31G* | NPA | NCI       | MM | -97.668  | -21.773  | -14.865  | -15.327 | -0.919  | 18.863  | -6.413  | 21.150  |
| QM | B3LYP | 6-31G* | NPA | NCI       | NO | -116.015 | -76.100  | 15.062   | 4.267   | 15.802  | -11.866 | -25.240 | 2.025   |
| QM | B3LYP | 6-31G* | NPA | NCI       | QM | -125.577 | -45.238  | -2.376   | -16.585 | 5.398   | 0.821   | -8.356  | 24.401  |
| QM | B3LYP | 6-31G* | NPA | OPENBABEL | MM | -87.166  | -29.267  | 1.375    | -0.917  | 9.752   | 9.580   | -23.175 | 9.454   |
| QM | B3LYP | 6-31G* | NPA | OPENBABEL | NO | -83.446  | -26.746  | -1.418   | -1.476  | 9.083   | 12.587  | -23.335 | 8.428   |
| QM | B3LYP | 6-31G* | NPA | OPENBABEL | QM | -82.901  | -28.474  | 3.360    | -5.253  | 9.013   | 4.121   | -16.940 | 11.523  |
| QM | B3LYP | 6-31G* | NPA | PUBCHEM   | MM | -128.687 | -30.331  | 0.156    | -20.921 | 1.447   | -1.825  | 2.905   | 38.882  |
| QM | B3LYP | 6-31G* | NPA | PUBCHEM   | NO | -121.712 | -38.537  | 5.029    | -1.663  | 11.127  | 0.276   | -21.577 | 25.870  |
| QM | B3LYP | 6-31G* | NPA | PUBCHEM   | QM | -123.782 | -36.049  | 7.864    | -35.225 | -2.694  | -14.973 | 14.930  | 32.457  |
| QM | B3LYP | 6-31G* | NPA | RDKIT     | MM | -77.875  | -49.366  | 6.124    | -12.479 | 9.695   | -4.999  | -13.406 | -2.589  |
| QM | B3LYP | 6-31G* | NPA | RDKIT     | QM | -73.611  | -28.225  | -8.057   | -6.807  | 3.477   | 14.606  | -14.714 | 4.785   |
| QM | B3LYP | 6-31G* | NPA | RDKIT     | MM | -66.963  | -50.661  | -23.414  | -5.537  | 19.143  | 32.528  | -33.628 | -15.023 |
| QM | B3LYP | 6-31G* | NPA | RDKIT     | NO | -51.926  | -23.764  | -3.489   | -17.613 | 6.071   | 7.580   | -6.672  | 0.700   |
| QM | HF    | STO-3G | MPA | BALLOON   | MM | -65.809  | -59.120  | -9.047   | -14.110 | 6.102   | 33.624  | -32.713 | -19.210 |
| QM | HF    | STO-3G | MPA | BALLOON   | NO | -53.287  | -66.783  | 10.040   | -27.559 | 7.114   | 19.565  | -20.695 | -25.212 |
| QM | HF    | STO-3G | MPA | BALLOON   | QM | -87.214  | -100.770 | -19.708  | -12.198 | 14.569  | 28.864  | -45.884 | -24.294 |
| QM | HF    | STO-3G | MPA | FROG2     | MM | -113.082 | -89.509  | -58.668  | 10.339  | 8.509   | 63.325  | -43.403 | -5.206  |
| QM | HF    | STO-3G | MPA | FROG2     | NO | -99.620  | -54.758  | -54.535  | -4.554  | 10.803  | 72.521  | -31.998 | 2.432   |
| QM | HF    | STO-3G | MPA | FROG2     | QM | -79.633  | -137.152 | -29.677  | -5.831  | 21.414  | 37.528  | -53.903 | -33.856 |
| QM | HF    | STO-3G | MPA | NCI       | MM | -80.853  | 44.528   | -73.488  | -42.068 | -37.722 | 72.244  | 4.866   | 15.008  |
| QM | HF    | STO-3G | MPA | NCI       | NO | -92.614  | -128.833 | 6.998    | 5.363   | 24.070  | 4.339   | -40.049 | -24.294 |
| QM | HF    | STO-3G | MPA | NCI       | QM | -99.369  | -87.013  | -23.474  | -7.445  | 10.876  | 38.481  | -48.718 | -20.239 |
| QM | HF    | STO-3G | MPA | OPENBABEL | MM | -72.697  | -74.777  | 15.352   | -21.465 | 14.590  | 4.056   | -20.501 | -16.267 |
| QM | HF    | STO-3G | MPA | OPENBABEL | NO | -69.181  | -75.130  | 12.716   | -21.106 | 13.264  | 8.360   | -21.900 | -18.398 |
| QM | HF    | STO-3G | MPA | OPENBABEL | QM | -85.337  | -77.759  | 14.656   | -17.669 | 23.400  | 4.332   | -34.323 | -15.232 |
| QM | HF    | STO-3G | MPA | PUBCHEM   | MM | -94.349  | 7.240    | -107.593 | -19.998 | -26.149 | 107.707 | -16.836 | 12.685  |
| QM | HF    | STO-3G | MPA | PUBCHEM   | NO | -63.295  | -164.370 | 14.203   | 0.007   | 37.979  | 7.432   | -61.145 | -47.385 |
| QM | HF    | STO-3G | MPA | PUBCHEM   | QM | -73.185  | -11.171  | -0.204   | -47.164 | -16.421 | -4.672  | 3.732   | -2.562  |
| QM | HF    | STO-3G | MPA | RDKIT     | MM | -101.836 | -47.152  | 1.090    | -16.130 | 14.854  | 7.303   | -25.140 | 1.872   |
| QM | HF    | STO-3G | MPA | RDKIT     | QM | -90.446  | -71.434  | -0.866   | -12.877 | 14.246  | 16.551  | -34.556 | -13.263 |

Table S4: Parameters of all the QSPR models.

|                |     |        |     |           |    |          |         |          |          |         |         |          |         |
|----------------|-----|--------|-----|-----------|----|----------|---------|----------|----------|---------|---------|----------|---------|
| QM             | HF  | STO-3G | MPA | RDKIT     | MM | -85.596  | -65.334 | -27.513  | -6.789   | 17.849  | 48.626  | -43.275  | -10.595 |
| QM             | HF  | STO-3G | MPA | RDKIT     | NO | -65.317  | -27.260 | -8.827   | -23.010  | 11.944  | 17.603  | -19.139  | 1.265   |
| Svob2007-chal2 | HF  | STO-3G | MPA | BALLOON   | MM | -9.498   | -16.478 | 14.793   | -28.447  | -0.498  | 1.234   | -7.717   | -13.919 |
| Svob2007-chal2 | HF  | STO-3G | MPA | BALLOON   | NO | -13.816  | -14.415 | 22.766   | -38.179  | 6.979   | -18.180 | 1.125    | -7.849  |
| Svob2007-chal2 | HF  | STO-3G | MPA | BALLOON   | QM | -16.156  | -18.713 | 20.455   | -30.348  | 3.519   | -7.391  | -6.068   | -11.820 |
| Svob2007-chal2 | HF  | STO-3G | MPA | FROG2     | MM | -25.740  | 26.930  | 10.502   | -51.298  | -18.627 | 11.943  | 6.427    | -4.418  |
| Svob2007-chal2 | HF  | STO-3G | MPA | FROG2     | NO | -27.517  | -7.553  | 20.011   | -29.586  | -1.371  | -15.144 | 8.166    | -0.834  |
| Svob2007-chal2 | HF  | STO-3G | MPA | FROG2     | QM | -11.791  | 15.914  | 22.214   | -67.482  | -12.341 | -11.045 | 18.939   | -7.815  |
| Svob2007-chal2 | HF  | STO-3G | MPA | NCI       | MM | 73.174   | -56.880 | 24.662   | -72.356  | 13.847  | -19.980 | -0.330   | -48.024 |
| Svob2007-chal2 | HF  | STO-3G | MPA | NCI       | NO | 65.320   | -61.272 | -5.649   | -32.029  | 6.027   | 19.699  | -31.055  | -50.327 |
| Svob2007-chal2 | HF  | STO-3G | MPA | NCI       | QM | 63.367   | -52.811 | 8.459    | -55.013  | 5.345   | -2.222  | -10.675  | -45.786 |
| Svob2007-chal2 | HF  | STO-3G | MPA | OPENBABEL | MM | -24.650  | -1.121  | -0.736   | -14.553  | -0.602  | 18.537  | -22.073  | -6.270  |
| Svob2007-chal2 | HF  | STO-3G | MPA | OPENBABEL | NO | -24.932  | 0.426   | 0.121    | -16.523  | -0.483  | 17.708  | -21.642  | -6.096  |
| Svob2007-chal2 | HF  | STO-3G | MPA | OPENBABEL | QM | -29.518  | -6.614  | 17.629   | -26.718  | 4.936   | -4.340  | -9.131   | -4.513  |
| Svob2007-chal2 | HF  | STO-3G | MPA | PUBCHEM   | MM | 79.115   | -36.773 | 14.259   | -84.073  | 1.644   | -7.268  | 3.385    | -48.340 |
| Svob2007-chal2 | HF  | STO-3G | MPA | PUBCHEM   | NO | 90.471   | -56.855 | 8.327    | -73.529  | 11.237  | -6.535  | -7.882   | -53.555 |
| Svob2007-chal2 | HF  | STO-3G | MPA | PUBCHEM   | QM | 40.836   | -47.736 | 30.916   | -63.447  | 24.066  | -21.879 | -12.257  | -37.779 |
| Svob2007-chal2 | HF  | STO-3G | MPA | RDKIT     | MM | -24.312  | -25.243 | 10.456   | -7.445   | -0.805  | 2.533   | -10.443  | -8.040  |
| Svob2007-chal2 | HF  | STO-3G | MPA | RDKIT     | QM | -21.331  | -20.410 | 11.864   | -13.065  | -5.847  | 6.229   | -6.633   | -10.350 |
| Svob2007-chal2 | HF  | STO-3G | MPA | RDKIT     | MM | -19.080  | 22.246  | -10.798  | -28.507  | -19.401 | 35.173  | -16.272  | -8.197  |
| Svob2007-chal2 | HF  | STO-3G | MPA | RDKIT     | NO | -11.879  | 12.224  | 8.576    | -45.036  | -6.589  | 0.930   | 0.324    | -5.360  |
| QM             | PM6 | none   | MPA | NCI       | NO | -60.643  | -54.911 | 6.001    | 18.382   | 13.583  | -10.455 | -39.876  | -6.835  |
| QM             | PM6 | none   | MPA | NCI       | MM | -67.460  | -30.320 | -7.383   | -5.584   | 6.195   | 7.349   | -13.610  | 4.286   |
| QM             | PM6 | none   | MPA | PUBCHEM   | NO | -72.763  | -40.699 | 1.661    | 1.580    | 15.317  | -2.243  | -25.129  | 5.065   |
| QM             | PM6 | none   | MPA | NCI       | QM | -63.098  | -32.220 | -4.643   | -3.409   | 6.908   | 3.821   | -16.992  | 1.886   |
| QM             | PM6 | none   | MPA | FROG2     | MM | -88.013  | -41.695 | -8.696   | 3.686    | 13.178  | 8.674   | -22.132  | 10.170  |
| QM             | PM6 | none   | MPA | FROG2     | QM | -51.819  | -41.760 | -7.862   | -0.548   | 13.256  | 5.722   | -23.993  | -4.028  |
| QM             | PM6 | none   | MPA | PUBCHEM   | MM | -74.905  | -25.925 | -7.516   | -10.085  | 3.080   | 7.603   | -7.623   | 8.059   |
| QM             | PM6 | none   | MPA | OPENBABEL | MM | -44.098  | -30.929 | -8.379   | -3.782   | 10.285  | 7.451   | -21.367  | -4.497  |
| QM             | PM6 | none   | MPA | PUBCHEM   | QM | -53.215  | -23.402 | -4.090   | -10.177  | -0.851  | 1.954   | -8.791   | -0.380  |
| QM             | PM6 | none   | MPA | OPENBABEL | NO | -45.106  | -30.627 | -8.759   | -3.581   | 10.743  | 8.023   | -22.053  | -4.192  |
| QM             | PM6 | none   | MPA | OPENBABEL | QM | -42.859  | -28.066 | -5.447   | -0.705   | 10.083  | 4.702   | -23.535  | -3.534  |
| QM             | PM6 | none   | MPA | BALLOON   | QM | -15.418  | -37.042 | -0.694   | -4.240   | 8.088   | -2.768  | -21.116  | -16.294 |
| QM             | PM6 | none   | MPA | RDKIT     | MM | -62.551  | -25.746 | -0.460   | -6.769   | 5.834   | -0.081  | -12.619  | 5.247   |
| QM             | PM6 | none   | MPA | FROG2     | NO | -32.089  | -15.134 | 2.636    | -6.360   | -4.574  | -2.826  | -12.021  | -7.567  |
| QM             | PM6 | none   | MPA | BALLOON   | MM | -21.356  | -34.009 | -5.368   | -9.780   | 6.044   | 2.928   | -14.058  | -13.642 |
| Gasteiger      |     |        |     | NCI       | NO | -2.021E4 | 5.484E3 | -7.313E2 | -4.562E2 | 4.481E2 | 4.740E2 | -5.107E2 | 8.686E3 |
| QM             | PM6 | none   | MPA | RDKIT     | MM | -35.805  | -38.066 | -3.966   | -10.032  | 13.788  | 2.115   | -17.256  | -6.939  |
| QM             | PM6 | none   | MPA | BALLOON   | NO | -59.647  | -19.241 | -1.331   | -6.397   | 7.696   | 1.847   | -19.382  | 3.906   |
| QM             | PM6 | none   | MPA | RDKIT     | NO | -57.645  | -19.223 | -1.042   | -15.463  | 7.863   | 2.500   | -4.999   | 8.445   |
| QM             | PM6 | none   | MPA | RDKIT     | QM | -38.801  | -26.462 | -0.662   | -3.415   | 7.774   | 0.037   | -19.844  | -4.405  |

Table S4: Parameters of all the QSPR models.

| Charges         | Theory level | Basis set | Charge scheme | 3D source | Opt | $P_a(H)$   | $P_a(N)$  | $P_a(C1)$ | $P_a(HA)$ | $P_a(NA)$ | $P_a(C1A)$ |  | $P_a$     |
|-----------------|--------------|-----------|---------------|-----------|-----|------------|-----------|-----------|-----------|-----------|------------|--|-----------|
| <b>Anilines</b> |              |           |               |           |     |            |           |           |           |           |            |  |           |
| Bult2002-npa    | B3LYP        | 6-31G*    | NPA           | BALLOON   | MM  | 1794.262   | -982.507  | -5439.152 | 2761.729  | 3620.073  | -1913.329  |  | -743.691  |
| Bult2002-npa    | B3LYP        | 6-31G*    | NPA           | BALLOON   | NO  | -408.542   | 671.403   | -274.770  | 519.656   | -636.985  | -36.076    |  | -352.942  |
| Bult2002-npa    | B3LYP        | 6-31G*    | NPA           | BALLOON   | QM  | -2764.013  | -653.293  | 5671.063  | -2171.939 | -414.422  | 1003.241   |  | 2718.701  |
| Bult2002-npa    | B3LYP        | 6-31G*    | NPA           | FROG2     | MM  | 2545.247   | -318.072  | -4179.460 | 931.836   | 198.778   | 250.641    |  | -1920.217 |
| Bult2002-npa    | B3LYP        | 6-31G*    | NPA           | FROG2     | NO  | -2286.345  | -124.454  | 41.907    | 2130.640  | 2563.609  | -2234.716  |  | 1149.385  |
| Bult2002-npa    | B3LYP        | 6-31G*    | NPA           | FROG2     | QM  | -1557.346  | -39.313   | 4652.221  | -2511.103 | -2214.885 | 1898.902   |  | 1234.443  |
| Bult2002-npa    | B3LYP        | 6-31G*    | NPA           | NCI       | MM  | 3337.197   | -1183.086 | -6538.487 | 2174.638  | 2627.959  | -904.054   |  | -1836.368 |
| Bult2002-npa    | B3LYP        | 6-31G*    | NPA           | NCI       | NO  | 1213.606   | -641.345  | -2959.267 | 1208.884  | 1481.117  | -503.583   |  | -598.450  |
| Bult2002-npa    | B3LYP        | 6-31G*    | NPA           | NCI       | QM  | -2691.545  | -790.741  | 2893.650  | 80.197    | 1988.065  | -779.389   |  | 2682.216  |
| Bult2002-npa    | B3LYP        | 6-31G*    | NPA           | OPENBABEL | MM  | 2240.907   | -351.849  | -4052.633 | 1133.185  | 562.418   | -23.357    |  | -1652.428 |
| Bult2002-npa    | B3LYP        | 6-31G*    | NPA           | OPENBABEL | NO  | 1916.121   | -305.800  | -3339.137 | 839.414   | 273.267   | 171.533    |  | -1435.857 |
| Bult2002-npa    | B3LYP        | 6-31G*    | NPA           | OPENBABEL | QM  | -2084.349  | -58.354   | 6487.016  | -3526.909 | -2988.772 | 2520.467   |  | 1716.896  |
| Bult2002-npa    | B3LYP        | 6-31G*    | NPA           | PUBCHEM   | MM  | 3162.844   | -1003.675 | -5410.372 | 1372.879  | 1487.346  | -138.345   |  | -1859.313 |
| Bult2002-npa    | B3LYP        | 6-31G*    | NPA           | PUBCHEM   | NO  | -3897.061  | 497.380   | 4484.446  | -77.815   | 292.477   | -647.786   |  | 2599.303  |
| Bult2002-npa    | B3LYP        | 6-31G*    | NPA           | PUBCHEM   | QM  | -697.467   | -891.363  | 1362.351  | -591.414  | 433.737   | 594.883    |  | 1102.582  |
| Bult2002-npa    | B3LYP        | 6-31G*    | NPA           | RDKIT     | MM  | 2729.432   | -2336.465 | -6334.854 | 2608.803  | 5022.732  | -1762.601  |  | -422.083  |
| Bult2002-npa    | B3LYP        | 6-31G*    | NPA           | RDKIT     | QM  | -2807.527  | -677.340  | 2828.636  | 241.948   | 2036.145  | -920.170   |  | 2679.353  |
| Bult2002-npa    | B3LYP        | 6-31G*    | NPA           | RDKIT     | MM  | 2208.244   | -262.143  | -3696.125 | 854.580   | 129.420   | 249.297    |  | -1701.733 |
| Bult2002-npa    | B3LYP        | 6-31G*    | NPA           | RDKIT     | NO  | -546.581   | 1415.035  | -70.866   | 480.771   | -1840.716 | 232.359    |  | -871.282  |
| Bult2004-aim    | B3LYP        | 6-31G*    | AIM           | BALLOON   | MM  | -1268.655  | -104.037  | -3382.921 | 3497.992  | 3643.282  | -3044.376  |  | 198.521   |
| Bult2004-aim    | B3LYP        | 6-31G*    | AIM           | BALLOON   | NO  | -1176.272  | 1246.706  | -3110.162 | 3212.916  | 2375.322  | -2567.901  |  | -464.171  |
| Bult2004-aim    | B3LYP        | 6-31G*    | AIM           | BALLOON   | QM  | -5797.975  | -1920.996 | 2628.288  | 368.855   | 2949.621  | -1654.017  |  | 3694.365  |
| Bult2004-aim    | B3LYP        | 6-31G*    | AIM           | FROG2     | MM  | -5773.511  | 352.839   | 450.065   | 2225.292  | 2770.384  | -2505.841  |  | 2151.559  |
| Bult2004-aim    | B3LYP        | 6-31G*    | AIM           | FROG2     | NO  | -5326.670  | -1341.065 | 1945.079  | 729.026   | 1808.769  | -1086.823  |  | 1856.037  |
| Bult2004-aim    | B3LYP        | 6-31G*    | AIM           | FROG2     | QM  | -3626.635  | -1476.609 | 74.034    | 1574.672  | 3313.917  | -2148.192  |  | 2255.368  |
| Bult2004-aim    | B3LYP        | 6-31G*    | AIM           | NCI       | MM  | -4435.854  | 302.813   | -1364.432 | 3198.049  | 3674.487  | -3259.543  |  | 1549.470  |
| Bult2004-aim    | B3LYP        | 6-31G*    | AIM           | NCI       | NO  | -4528.503  | 902.382   | -152.420  | 2173.562  | 2020.362  | -2113.168  |  | 1261.558  |
| Bult2004-aim    | B3LYP        | 6-31G*    | AIM           | NCI       | QM  | -3735.693  | -1388.370 | -1192.894 | 2732.023  | 4259.262  | -2997.757  |  | 2053.622  |
| Bult2004-aim    | B3LYP        | 6-31G*    | AIM           | OPENBABEL | MM  | -4841.096  | 182.134   | -249.535  | 2406.890  | 2878.904  | -2521.463  |  | 1763.018  |
| Bult2004-aim    | B3LYP        | 6-31G*    | AIM           | OPENBABEL | NO  | -6166.064  | 1.922     | 458.599   | 2399.178  | 3245.449  | -2754.250  |  | 2473.781  |
| Bult2004-aim    | B3LYP        | 6-31G*    | AIM           | OPENBABEL | QM  | -3470.305  | -1405.616 | 161.529   | 1424.325  | 3043.956  | -1947.745  |  | 2135.169  |
| Bult2004-aim    | B3LYP        | 6-31G*    | AIM           | PUBCHEM   | MM  | -4198.955  | 120.097   | -1101.460 | 2856.184  | 3312.780  | -2864.833  |  | 1486.809  |
| Bult2004-aim    | B3LYP        | 6-31G*    | AIM           | PUBCHEM   | NO  | -6131.106  | 492.395   | 1220.164  | 1730.513  | 2386.306  | -2249.337  |  | 2399.513  |
| Bult2004-aim    | B3LYP        | 6-31G*    | AIM           | PUBCHEM   | QM  | -2913.591  | -1703.695 | -1423.262 | 2550.101  | 4232.452  | -2828.150  |  | 1880.773  |
| Bult2004-aim    | B3LYP        | 6-31G*    | AIM           | RDKIT     | MM  | -8296.387  | 6654.365  | 1549.699  | 2431.967  | -1022.048 | -2113.250  |  | 349.703   |
| Bult2004-aim    | B3LYP        | 6-31G*    | AIM           | RDKIT     | QM  | -3959.791  | -461.961  | -1499.376 | 3095.336  | 4185.176  | -3347.141  |  | 1794.812  |
| Bult2004-aim    | B3LYP        | 6-31G*    | AIM           | RDKIT     | MM  | -5056.691  | 198.552   | -267.796  | 2521.615  | 3060.666  | -2683.650  |  | 1870.160  |
| Bult2004-aim    | B3LYP        | 6-31G*    | AIM           | RDKIT     | NO  | -1659.862  | 5288.330  | -2048.178 | 2508.321  | -1079.062 | -1437.820  |  | -2062.447 |
| Chavez2006      | B3LYP        | 6-31G*    | MPA           | BALLOON   | MM  | 1928.255   | -1174.730 | -3810.481 | 2030.357  | 2271.616  | -1173.071  |  | -469.556  |
| Chavez2006      | B3LYP        | 6-31G*    | MPA           | BALLOON   | NO  | -976.440   | 1439.180  | -1920.683 | 1689.016  | 637.683   | -925.504   |  | -381.170  |
| Chavez2006      | B3LYP        | 6-31G*    | MPA           | BALLOON   | QM  | -10642.070 | -138.437  | 6328.491  | -827.399  | 1236.013  | -837.785   |  | 3167.770  |

Table S4: Parameters of all the QSPR models.

|            |       |        |     |           |    |           |           |           |           |          |           |  |          |
|------------|-------|--------|-----|-----------|----|-----------|-----------|-----------|-----------|----------|-----------|--|----------|
| Chavez2006 | B3LYP | 6-31G* | MPA | FROG2     | MM | -6756.797 | -909.421  | 1692.459  | 1121.726  | 2103.076 | -1152.380 |  | 1849.583 |
| Chavez2006 | B3LYP | 6-31G* | MPA | FROG2     | NO | -6749.498 | -1044.184 | 1827.824  | 1033.696  | 1890.826 | -1350.875 |  | 1515.814 |
| Chavez2006 | B3LYP | 6-31G* | MPA | FROG2     | QM | -7800.861 | -788.872  | 4422.792  | -480.346  | 1330.002 | -654.759  |  | 2455.017 |
| Chavez2006 | B3LYP | 6-31G* | MPA | NCI       | MM | -2162.218 | 32.604    | -742.651  | 1253.151  | 1163.530 | -807.450  |  | 353.000  |
| Chavez2006 | B3LYP | 6-31G* | MPA | NCI       | NO | 1107.766  | -1418.732 | -2375.337 | 1267.299  | 1630.086 | -625.143  |  | -149.965 |
| Chavez2006 | B3LYP | 6-31G* | MPA | NCI       | QM | -6095.545 | -3128.142 | 1730.309  | 875.572   | 3470.686 | -1357.678 |  | 2396.411 |
| Chavez2006 | B3LYP | 6-31G* | MPA | OPENBABEL | MM | -3355.636 | 217.597   | 524.337   | 744.140   | 432.143  | -341.551  |  | 600.649  |
| Chavez2006 | B3LYP | 6-31G* | MPA | OPENBABEL | NO | -1396.547 | -184.740  | -1093.158 | 1229.977  | 1019.156 | -623.479  |  | 163.533  |
| Chavez2006 | B3LYP | 6-31G* | MPA | OPENBABEL | QM | -8301.369 | -1910.644 | 5467.844  | -1061.451 | 1312.640 | -250.405  |  | 2904.001 |
| Chavez2006 | B3LYP | 6-31G* | MPA | PUBCHEM   | MM | -1524.014 | -1139.739 | -1108.238 | 1287.154  | 1653.311 | -741.366  |  | 448.615  |
| Chavez2006 | B3LYP | 6-31G* | MPA | PUBCHEM   | NO | -7990.144 | 616.077   | 3508.006  | 245.305   | 581.973  | -602.468  |  | 1885.218 |
| Chavez2006 | B3LYP | 6-31G* | MPA | PUBCHEM   | QM | -5299.798 | -3608.759 | 1282.328  | 921.402   | 3903.578 | -1503.356 |  | 2359.534 |
| Chavez2006 | B3LYP | 6-31G* | MPA | RDKIT     | MM | 1971.318  | -631.891  | -3115.451 | 1497.892  | 1276.744 | -646.270  |  | -616.820 |
| Chavez2006 | B3LYP | 6-31G* | MPA | RDKIT     | QM | -6537.361 | -3034.567 | 1568.915  | 1149.479  | 3832.311 | -1647.814 |  | 2488.188 |
| Chavez2006 | B3LYP | 6-31G* | MPA | RDKIT     | MM | -4991.254 | 249.403   | 1661.541  | 498.484   | 331.360  | -281.472  |  | 1047.360 |
| Chavez2006 | B3LYP | 6-31G* | MPA | RDKIT     | NO | -1315.693 | 1765.127  | -1371.613 | 1407.727  | -68.094  | -530.391  |  | -423.171 |
| QM         | B3LYP | 6-31G* | AIM | BALLOON   | MM | -177.368  | 362.097   | -161.258  | -103.749  | 249.308  | 46.144    |  | 34.947   |
| QM         | B3LYP | 6-31G* | AIM | BALLOON   | NO | -127.676  | -111.482  | -97.219   | -86.901   | 200.014  | 89.972    |  | 245.858  |
| QM         | B3LYP | 6-31G* | AIM | BALLOON   | QM | 126.963   | 150.348   | -62.803   | -141.048  | 108.163  | 15.720    |  | -8.821   |
| QM         | B3LYP | 6-31G* | AIM | FROG2     | MM | -180.541  | 14.559    | -55.682   | -65.885   | 155.971  | 63.997    |  | 196.866  |
| QM         | B3LYP | 6-31G* | AIM | FROG2     | NO | -76.795   | -124.814  | -39.281   | 23.932    | 97.583   | -1.989    |  | 158.679  |
| QM         | B3LYP | 6-31G* | AIM | FROG2     | QM | -93.460   | -197.384  | -45.650   | -62.697   | 54.553   | 85.335    |  | 154.260  |
| QM         | B3LYP | 6-31G* | AIM | NCI       | MM | -234.195  | 37.979    | -38.008   | -99.436   | 84.423   | 99.845    |  | 145.374  |
| QM         | B3LYP | 6-31G* | AIM | NCI       | NO | -334.300  | -175.350  | 84.154    | -16.481   | -19.817  | 58.742    |  | 300.848  |
| QM         | B3LYP | 6-31G* | AIM | NCI       | QM | 75.948    | 318.883   | -82.796   | -134.528  | 95.413   | -1.146    |  | -108.945 |
| QM         | B3LYP | 6-31G* | AIM | OPENBABEL | MM | -189.293  | 55.274    | -75.672   | -87.430   | 155.098  | 76.901    |  | 161.956  |
| QM         | B3LYP | 6-31G* | AIM | OPENBABEL | NO | -172.279  | 126.304   | -89.862   | -68.751   | 195.869  | 47.622    |  | 152.406  |
| QM         | B3LYP | 6-31G* | AIM | OPENBABEL | QM | -30.978   | -331.936  | 14.425    | -44.212   | -4.741   | 68.224    |  | 191.822  |
| QM         | B3LYP | 6-31G* | AIM | PUBCHEM   | MM | -235.584  | 14.266    | -76.203   | -138.931  | 81.318   | 134.962   |  | 118.203  |
| QM         | B3LYP | 6-31G* | AIM | PUBCHEM   | NO | -93.470   | 44.045    | -191.497  | 75.332    | -15.005  | 10.921    |  | -254.207 |
| QM         | B3LYP | 6-31G* | AIM | PUBCHEM   | QM | -182.328  | 120.291   | -74.960   | -62.830   | 14.915   | 58.906    |  | -42.202  |
| QM         | B3LYP | 6-31G* | AIM | RDKIT     | MM | -152.627  | 28.087    | -75.692   | 117.257   | 54.962   | -53.276   |  | -2.519   |
| QM         | B3LYP | 6-31G* | AIM | RDKIT     | QM | 79.646    | 152.079   | -77.554   | -131.015  | 125.842  | 29.380    |  | 4.825    |
| QM         | B3LYP | 6-31G* | AIM | RDKIT     | MM | -197.068  | 66.956    | -75.685   | -94.932   | 151.631  | 81.852    |  | 156.804  |
| QM         | B3LYP | 6-31G* | AIM | RDKIT     | NO | -25.592   | -321.111  | -0.227    | 20.505    | 86.955   | -12.647   |  | 268.108  |
| QM         | B3LYP | 6-31G* | MPA | BALLOON   | MM | -284.150  | 72.511    | -76.683   | -4.029    | 109.029  | 5.227     |  | 76.001   |
| QM         | B3LYP | 6-31G* | MPA | BALLOON   | NO | -338.372  | 134.298   | -48.999   | 18.604    | 103.721  | -25.844   |  | 81.388   |
| QM         | B3LYP | 6-31G* | MPA | BALLOON   | QM | -143.369  | -80.018   | -50.098   | -34.529   | 48.491   | 41.794    |  | 83.160   |
| QM         | B3LYP | 6-31G* | MPA | FROG2     | MM | -274.832  | 65.854    | -91.737   | -38.445   | 65.432   | 38.799    |  | 43.283   |
| QM         | B3LYP | 6-31G* | MPA | FROG2     | NO | -237.004  | 62.297    | 52.337    | 7.597     | -56.961  | -7.796    |  | 61.393   |
| QM         | B3LYP | 6-31G* | MPA | FROG2     | QM | -182.804  | -71.759   | -90.362   | -32.348   | 75.732   | 36.855    |  | 77.932   |
| QM         | B3LYP | 6-31G* | MPA | NCI       | MM | -273.501  | 90.141    | -80.660   | -40.660   | 66.508   | 41.160    |  | 42.424   |
| QM         | B3LYP | 6-31G* | MPA | NCI       | NO | -281.085  | 46.072    | -50.228   | -4.130    | 83.572   | 4.881     |  | 91.372   |
| QM         | B3LYP | 6-31G* | MPA | NCI       | QM | -177.742  | -58.487   | -75.508   | -22.424   | 58.587   | 29.626    |  | 68.715   |
| QM         | B3LYP | 6-31G* | MPA | OPENBABEL | MM | -271.730  | 62.001    | -93.159   | -30.580   | 65.757   | 31.075    |  | 41.317   |



Table S4: Parameters of all the QSPR models.

|    |       |        |     |           |    |          |          |          |          |          |          |  |          |
|----|-------|--------|-----|-----------|----|----------|----------|----------|----------|----------|----------|--|----------|
| QM | B3LYP | 6-31G* | MPA | OPENBABEL | NO | -279.401 | 73.926   | -92.396  | -17.400  | 69.727   | 20.223   |  | 38.974   |
| QM | B3LYP | 6-31G* | MPA | OPENBABEL | QM | -171.355 | -82.220  | -77.807  | -32.344  | 69.924   | 37.304   |  | 84.764   |
| QM | B3LYP | 6-31G* | MPA | PUBCHEM   | MM | -273.601 | 49.535   | -83.437  | -40.419  | 69.186   | 41.859   |  | 58.949   |
| QM | B3LYP | 6-31G* | MPA | PUBCHEM   | NO | -196.213 | -49.320  | -51.393  | -51.242  | 60.885   | 51.564   |  | 101.018  |
| QM | B3LYP | 6-31G* | MPA | PUBCHEM   | QM | -201.442 | -83.056  | -62.604  | -14.759  | 100.413  | 21.324   |  | 122.173  |
| QM | B3LYP | 6-31G* | MPA | RDKIT     | MM | -223.511 | 122.164  | -69.363  | 64.344   | 50.042   | -52.559  |  | -19.516  |
| QM | B3LYP | 6-31G* | MPA | RDKIT     | QM | -186.982 | -42.610  | -79.312  | -25.052  | 70.327   | 30.983   |  | 70.363   |
| QM | B3LYP | 6-31G* | MPA | RDKIT     | MM | -272.979 | 61.255   | -93.446  | -32.577  | 68.221   | 32.881   |  | 43.869   |
| QM | B3LYP | 6-31G* | MPA | RDKIT     | NO | -191.947 | -10.647  | -10.428  | 11.326   | -0.856   | -19.297  |  | 59.291   |
| QM | B3LYP | 6-31G* | NPA | BALLOON   | MM | -214.518 | -364.932 | 50.949   | -94.537  | 106.520  | 80.757   |  | 354.305  |
| QM | B3LYP | 6-31G* | NPA | BALLOON   | NO | -69.249  | -792.525 | 62.328   | -166.711 | 179.728  | 154.492  |  | 533.750  |
| QM | B3LYP | 6-31G* | NPA | BALLOON   | QM | -1.380   | -446.614 | -33.527  | -43.873  | -31.560  | 37.865   |  | 151.143  |
| QM | B3LYP | 6-31G* | NPA | FROG2     | MM | -307.608 | 246.860  | -111.555 | 31.691   | 226.597  | -17.942  |  | 50.720   |
| QM | B3LYP | 6-31G* | NPA | FROG2     | NO | -343.611 | 122.509  | 10.734   | 38.431   | 199.439  | -37.112  |  | 211.942  |
| QM | B3LYP | 6-31G* | NPA | FROG2     | QM | -49.108  | -522.766 | 19.929   | -52.179  | 27.820   | 41.478   |  | 280.521  |
| QM | B3LYP | 6-31G* | NPA | NCI       | MM | -321.572 | 427.882  | -158.216 | 57.501   | 85.953   | -44.717  |  | -139.074 |
| QM | B3LYP | 6-31G* | NPA | NCI       | NO | -37.922  | -257.644 | -108.107 | 1.518    | -78.691  | -0.732   |  | -6.309   |
| QM | B3LYP | 6-31G* | NPA | NCI       | QM | 5.960    | -233.182 | -92.191  | 9.545    | -132.032 | -9.946   |  | -52.286  |
| QM | B3LYP | 6-31G* | NPA | OPENBABEL | MM | -290.853 | 191.006  | -106.628 | 22.263   | 229.805  | -8.852   |  | 74.421   |
| QM | B3LYP | 6-31G* | NPA | OPENBABEL | NO | -308.806 | 302.484  | -126.448 | 53.203   | 252.725  | -37.767  |  | 27.357   |
| QM | B3LYP | 6-31G* | NPA | OPENBABEL | QM | -84.789  | -445.101 | 24.759   | -54.276  | 12.717   | 44.242   |  | 258.127  |
| QM | B3LYP | 6-31G* | NPA | PUBCHEM   | MM | -369.246 | 423.453  | -117.639 | 27.402   | -227.892 | -31.330  |  | -254.027 |
| QM | B3LYP | 6-31G* | NPA | PUBCHEM   | NO | -143.123 | -218.467 | -72.995  | -40.438  | -144.648 | 39.666   |  | 16.169   |
| QM | B3LYP | 6-31G* | NPA | PUBCHEM   | QM | -147.116 | 213.777  | -89.449  | 94.466   | -177.036 | -95.663  |  | -211.146 |
| QM | B3LYP | 6-31G* | NPA | RDKIT     | MM | -243.585 | 32.452   | -65.725  | 36.440   | 263.691  | -24.438  |  | 176.385  |
| QM | B3LYP | 6-31G* | NPA | RDKIT     | QM | 27.985   | -371.895 | -67.194  | -13.770  | -39.586  | 13.694   |  | 71.640   |
| QM | B3LYP | 6-31G* | NPA | RDKIT     | MM | -289.812 | 181.372  | -107.276 | 15.759   | 226.961  | -2.284   |  | 76.724   |
| QM | B3LYP | 6-31G* | NPA | RDKIT     | NO | -85.641  | -556.302 | -8.487   | 20.597   | 215.790  | -21.723  |  | 381.757  |
| QM | HF    | STO-3G | MPA | BALLOON   | MM | -88.478  | -204.604 | 31.469   | -74.378  | 153.730  | 46.866   |  | 203.745  |
| QM | HF    | STO-3G | MPA | BALLOON   | NO | -221.156 | 37.382   | 30.214   | 103.097  | 134.753  | -151.227 |  | 119.184  |
| QM | HF    | STO-3G | MPA | BALLOON   | QM | -180.902 | 71.966   | -267.500 | -67.379  | 54.185   | 45.633   |  | -65.105  |
| QM | HF    | STO-3G | MPA | FROG2     | MM | -216.445 | 45.565   | -158.971 | -113.062 | 488.028  | 122.949  |  | 240.011  |
| QM | HF    | STO-3G | MPA | FROG2     | NO | -320.013 | 216.102  | -130.545 | 102.130  | 326.402  | -58.122  |  | 104.945  |
| QM | HF    | STO-3G | MPA | FROG2     | QM | -141.832 | -34.716  | -91.010  | 37.718   | 53.855   | -43.666  |  | 36.085   |
| QM | HF    | STO-3G | MPA | NCI       | MM | -200.804 | -11.254  | -145.735 | -158.817 | 124.905  | 140.761  |  | 62.522   |
| QM | HF    | STO-3G | MPA | NCI       | NO | -332.358 | 146.832  | -121.009 | 10.073   | -105.340 | -32.490  |  | -97.553  |
| QM | HF    | STO-3G | MPA | NCI       | QM | -193.051 | 34.612   | -180.169 | -27.899  | -49.407  | 18.846   |  | -74.096  |
| QM | HF    | STO-3G | MPA | OPENBABEL | MM | -225.919 | 57.918   | -161.424 | -115.644 | 463.764  | 125.403  |  | 222.268  |
| QM | HF    | STO-3G | MPA | OPENBABEL | NO | -244.728 | 91.922   | -154.939 | -95.315  | 419.033  | 102.130  |  | 189.409  |
| QM | HF    | STO-3G | MPA | OPENBABEL | QM | -95.708  | -98.137  | -57.890  | 19.735   | 88.913   | -22.295  |  | 86.005   |
| QM | HF    | STO-3G | MPA | PUBCHEM   | MM | -289.913 | 77.673   | -171.420 | -95.769  | -33.684  | 92.075   |  | -58.995  |
| QM | HF    | STO-3G | MPA | PUBCHEM   | NO | -488.226 | 631.838  | -378.554 | 143.526  | -125.621 | -115.884 |  | -387.301 |
| QM | HF    | STO-3G | MPA | PUBCHEM   | QM | -381.322 | 234.249  | -180.957 | 33.986   | -337.670 | -58.886  |  | -281.369 |
| QM | HF    | STO-3G | MPA | RDKIT     | MM | -466.043 | 346.449  | 37.015   | 34.517   | 394.438  | -25.426  |  | 191.254  |
| QM | HF    | STO-3G | MPA | RDKIT     | QM | -114.179 | -34.296  | -165.441 | -47.399  | 84.332   | 36.734   |  | 20.821   |

Table S4: Parameters of all the QSPR models.

|                |     |        |     |           |    |          |          |          |          |         |         |  |          |
|----------------|-----|--------|-----|-----------|----|----------|----------|----------|----------|---------|---------|--|----------|
| QM             | HF  | STO-3G | MPA | RDKIT     | MM | -225.731 | 49.211   | -157.754 | -126.458 | 447.332 | 136.406 |  | 218.084  |
| QM             | HF  | STO-3G | MPA | RDKIT     | NO | -72.850  | -227.721 | 4.187    | 35.351   | 7.541   | -92.646 |  | 114.542  |
| Svob2007-chal2 | HF  | STO-3G | MPA | BALLOON   | MM | 327.749  | 186.567  | -623.779 | -98.407  | 440.852 | 63.604  |  | -17.237  |
| Svob2007-chal2 | HF  | STO-3G | MPA | BALLOON   | NO | -157.825 | 150.383  | -81.387  | -5.970   | 374.803 | 81.535  |  | 249.164  |
| Svob2007-chal2 | HF  | STO-3G | MPA | BALLOON   | QM | 14.375   | -130.925 | 43.747   | -232.293 | 281.110 | 321.261 |  | 266.463  |
| Svob2007-chal2 | HF  | STO-3G | MPA | FROG2     | MM | 417.441  | -91.239  | -457.434 | -376.374 | 111.960 | 256.625 |  | -154.711 |
| Svob2007-chal2 | HF  | STO-3G | MPA | FROG2     | NO | -407.498 | 3.952    | 306.925  | 46.293   | 11.952  | 75.713  |  | 211.088  |
| Svob2007-chal2 | HF  | STO-3G | MPA | FROG2     | QM | -19.347  | 32.992   | -77.404  | -112.467 | 388.681 | 193.309 |  | 267.907  |
| Svob2007-chal2 | HF  | STO-3G | MPA | NCI       | MM | 252.376  | 106.836  | -474.769 | -155.488 | 398.949 | 147.861 |  | 42.073   |
| Svob2007-chal2 | HF  | STO-3G | MPA | NCI       | NO | -176.873 | 140.147  | -31.026  | 9.026    | 518.423 | 133.339 |  | 391.532  |
| Svob2007-chal2 | HF  | STO-3G | MPA | NCI       | QM | -22.340  | 104.030  | -136.837 | -57.816  | 511.614 | 172.814 |  | 321.088  |
| Svob2007-chal2 | HF  | STO-3G | MPA | OPENBABEL | MM | 296.063  | -29.613  | -390.438 | -283.669 | 168.174 | 207.602 |  | -77.070  |
| Svob2007-chal2 | HF  | STO-3G | MPA | OPENBABEL | NO | 311.686  | -2.431   | -429.867 | -258.709 | 191.150 | 181.875 |  | -84.249  |
| Svob2007-chal2 | HF  | STO-3G | MPA | OPENBABEL | QM | -1.313   | -75.480  | 4.347    | -195.423 | 274.716 | 265.292 |  | 234.845  |
| Svob2007-chal2 | HF  | STO-3G | MPA | PUBCHEM   | MM | 456.658  | 333.664  | -896.776 | 2.773    | 675.562 | -10.783 |  | -6.166   |
| Svob2007-chal2 | HF  | STO-3G | MPA | PUBCHEM   | NO | -45.802  | -147.230 | 111.917  | -291.211 | 174.357 | 343.945 |  | 226.460  |
| Svob2007-chal2 | HF  | STO-3G | MPA | PUBCHEM   | QM | -124.295 | 126.197  | -77.358  | 28.332   | 265.777 | 42.366  |  | 164.247  |
| Svob2007-chal2 | HF  | STO-3G | MPA | RDKIT     | MM | -57.781  | 127.195  | -174.632 | -58.215  | 529.934 | 163.372 |  | 320.511  |
| Svob2007-chal2 | HF  | STO-3G | MPA | RDKIT     | QM | -31.522  | 133.783  | -156.134 | -17.497  | 550.086 | 141.487 |  | 338.584  |
| Svob2007-chal2 | HF  | STO-3G | MPA | RDKIT     | MM | 168.138  | -51.530  | -240.586 | -274.276 | 117.461 | 216.305 |  | -27.038  |
| Svob2007-chal2 | HF  | STO-3G | MPA | RDKIT     | NO | -171.003 | 142.796  | -70.758  | 32.689   | 256.971 | 25.531  |  | 163.688  |
| QM             | PM6 | none   | MPA | RDKIT     | MM | 21.046   | -85.215  | -94.955  | 0.361    | 97.766  | 14.006  |  | -65.973  |
| QM             | PM6 | none   | MPA | NCI       | NO | 164.469  | -266.893 | -87.256  | -14.482  | 45.017  | 20.552  |  | -39.463  |
| QM             | PM6 | none   | MPA | OPENBABEL | NO | 47.051   | -456.195 | -92.956  | -27.674  | 117.387 | 45.325  |  | 14.950   |
| QM             | PM6 | none   | MPA | FROG2     | MM | 23.092   | -391.282 | -94.666  | -25.059  | 118.655 | 42.385  |  | 6.296    |
| QM             | PM6 | none   | MPA | RDKIT     | MM | 28.463   | -406.654 | -94.410  | -28.330  | 119.290 | 45.894  |  | 9.431    |
| QM             | PM6 | none   | MPA | OPENBABEL | MM | 21.489   | -391.180 | -93.878  | -25.567  | 119.320 | 43.100  |  | 7.158    |
| QM             | PM6 | none   | MPA | NCI       | MM | -20.773  | -201.276 | -104.026 | -27.859  | 93.751  | 35.821  |  | -15.794  |
| QM             | PM6 | none   | MPA | PUBCHEM   | MM | 42.134   | -389.544 | -112.072 | -21.689  | 134.859 | 42.220  |  | -12.294  |
| QM             | PM6 | none   | MPA | PUBCHEM   | NO | 170.131  | -127.155 | -108.522 | 1.767    | 40.565  | 5.949   |  | -91.091  |
| QM             | PM6 | none   | MPA | NCI       | QM | -61.343  | 67.188   | -66.124  | -8.223   | -4.227  | 3.305   |  | -21.892  |
| QM             | PM6 | none   | MPA | BALLOON   | MM | 189.870  | -842.507 | -44.698  | -37.384  | 74.703  | 53.888  |  | 89.681   |
| QM             | PM6 | none   | MPA | BALLOON   | QM | 37.547   | -241.576 | -62.564  | -29.843  | 7.096   | 26.663  |  | 20.396   |
| QM             | PM6 | none   | MPA | RDKIT     | QM | -23.466  | -131.746 | -45.563  | -15.707  | 11.003  | 15.229  |  | 15.521   |
| QM             | PM6 | none   | MPA | FROG2     | NO | -24.573  | -141.138 | -38.603  | 6.367    | 13.782  | -1.738  |  | 7.617    |
| QM             | PM6 | none   | MPA | BALLOON   | NO | -49.918  | -578.780 | 2.414    | -6.040   | 102.636 | 30.921  |  | 101.318  |
| QM             | PM6 | none   | MPA | FROG2     | QM | -40.710  | -233.395 | -31.089  | -7.310   | 30.853  | 15.161  |  | 37.168   |
| QM             | PM6 | none   | MPA | OPENBABEL | QM | -52.165  | -215.298 | -23.176  | -5.454   | 20.761  | 12.347  |  | 42.179   |
| QM             | PM6 | none   | MPA | PUBCHEM   | QM | -143.750 | 159.604  | -53.154  | 10.911   | 36.228  | -5.581  |  | -30.791  |
| QM             | PM6 | none   | MPA | RDKIT     | NO | -13.198  | -493.481 | 2.540    | -6.639   | 17.185  | 13.921  |  | 99.396   |
| Gasteiger      |     |        |     | NCI       | NO | -3.822E5 | -8.503E5 | -1.416E6 | -1.080E4 | 1.411E6 | 7.806E3 |  | 2.509E5  |

## 5 Cross-validation Results

Table S5: Cross-validation results.

| Fold                                             | Training set |       |          |    | Test set |       |          |    |
|--------------------------------------------------|--------------|-------|----------|----|----------|-------|----------|----|
|                                                  | $R^2$        | RMSE  | $\Delta$ | N  | $Q^2$    | RMSE  | $\Delta$ | N  |
| <b>Phenols</b>                                   |              |       |          |    |          |       |          |    |
| QM B3LYP 6-31G*/AIM/NCI NO-OPT $R^2=0.973$       |              |       |          |    |          |       |          |    |
| 1                                                | 0.958        | 0.423 | 0.315    | 48 | 0.992    | 0.222 | 0.174    | 12 |
| 2                                                | 0.973        | 0.330 | 0.234    | 48 | 0.977    | 0.704 | 0.543    | 12 |
| 3                                                | 0.971        | 0.337 | 0.253    | 48 | 0.921    | 0.636 | 0.413    | 12 |
| 4                                                | 0.969        | 0.357 | 0.283    | 48 | 0.971    | 0.555 | 0.370    | 12 |
| 5                                                | 0.963        | 0.414 | 0.304    | 48 | 0.971    | 0.266 | 0.228    | 12 |
| QM B3LYP 6-31G*/MPA/NCI NO-OPT $R^2=0.971$       |              |       |          |    |          |       |          |    |
| 1                                                | 0.971        | 0.341 | 0.282    | 48 | 0.974    | 0.465 | 0.376    | 12 |
| 2                                                | 0.974        | 0.349 | 0.271    | 48 | 0.959    | 0.376 | 0.331    | 12 |
| 3                                                | 0.974        | 0.351 | 0.273    | 48 | 0.952    | 0.383 | 0.314    | 12 |
| 4                                                | 0.971        | 0.355 | 0.285    | 48 | 0.976    | 0.366 | 0.276    | 12 |
| 5                                                | 0.969        | 0.352 | 0.289    | 48 | 0.980    | 0.379 | 0.311    | 12 |
| QM HF STO-3G/MPA/FROG2 QM-OPT $R^2=0.969$        |              |       |          |    |          |       |          |    |
| 1                                                | 0.979        | 0.290 | 0.204    | 48 | 0.938    | 0.649 | 0.489    | 12 |
| 2                                                | 0.973        | 0.356 | 0.257    | 48 | 0.928    | 0.455 | 0.361    | 12 |
| 3                                                | 0.972        | 0.361 | 0.273    | 48 | 0.946    | 0.423 | 0.290    | 12 |
| 4                                                | 0.964        | 0.394 | 0.301    | 48 | 0.992    | 0.238 | 0.195    | 12 |
| 5                                                | 0.965        | 0.371 | 0.285    | 48 | 0.982    | 0.363 | 0.274    | 12 |
| QM HF STO-3G/MPA/FROG2 MM-OPT $R^2=0.967$        |              |       |          |    |          |       |          |    |
| 1                                                | 0.970        | 0.348 | 0.273    | 48 | 0.966    | 0.505 | 0.400    | 12 |
| 2                                                | 0.976        | 0.340 | 0.259    | 48 | 0.883    | 0.570 | 0.468    | 12 |
| 3                                                | 0.971        | 0.370 | 0.291    | 48 | 0.942    | 0.436 | 0.325    | 12 |
| 4                                                | 0.963        | 0.399 | 0.315    | 48 | 0.986    | 0.289 | 0.238    | 12 |
| 5                                                | 0.961        | 0.391 | 0.309    | 48 | 0.983    | 0.333 | 0.253    | 12 |
| QM B3LYP 6-31G*/MPA/OPENBABEL MM-OPT $R^2=0.965$ |              |       |          |    |          |       |          |    |
| 1                                                | 0.961        | 0.397 | 0.283    | 48 | 0.976    | 0.433 | 0.312    | 12 |
| 2                                                | 0.973        | 0.359 | 0.261    | 48 | 0.956    | 0.521 | 0.299    | 12 |
| 3                                                | 0.971        | 0.369 | 0.261    | 48 | 0.950    | 0.489 | 0.298    | 12 |
| 4                                                | 0.963        | 0.399 | 0.264    | 48 | 0.982    | 0.368 | 0.309    | 12 |
| 5                                                | 0.961        | 0.392 | 0.274    | 48 | 0.974    | 0.395 | 0.292    | 12 |
| QM B3LYP 6-31G*/MPA/FROG2 QM-OPT $R^2=0.963$     |              |       |          |    |          |       |          |    |
| 1                                                | 0.969        | 0.350 | 0.281    | 48 | 0.930    | 0.644 | 0.509    | 12 |
| 2                                                | 0.965        | 0.405 | 0.319    | 48 | 0.943    | 0.419 | 0.257    | 12 |
| 3                                                | 0.967        | 0.395 | 0.313    | 48 | 0.938    | 0.435 | 0.341    | 12 |
| 4                                                | 0.961        | 0.411 | 0.316    | 48 | 0.977    | 0.369 | 0.336    | 12 |
| 5                                                | 0.961        | 0.393 | 0.312    | 48 | 0.966    | 0.450 | 0.355    | 12 |
| QM HF STO-3G/MPA/PUBCHEM MM-OPT $R^2=0.963$      |              |       |          |    |          |       |          |    |
| 1                                                | 0.957        | 0.417 | 0.315    | 48 | 0.977    | 0.380 | 0.335    | 12 |
| 2                                                | 0.970        | 0.379 | 0.287    | 48 | 0.925    | 0.490 | 0.411    | 12 |
| 3                                                | 0.969        | 0.379 | 0.287    | 48 | 0.930    | 0.538 | 0.338    | 12 |
| 4                                                | 0.958        | 0.425 | 0.328    | 48 | 0.984    | 0.301 | 0.214    | 12 |
| 5                                                | 0.964        | 0.379 | 0.306    | 48 | 0.963    | 0.524 | 0.394    | 12 |
| QM B3LYP 6-31G*/MPA/NCI MM-OPT $R^2=0.963$       |              |       |          |    |          |       |          |    |
| 1                                                | 0.957        | 0.417 | 0.297    | 48 | 0.979    | 0.411 | 0.322    | 12 |
| 2                                                | 0.968        | 0.391 | 0.276    | 48 | 0.927    | 0.468 | 0.350    | 12 |
| 3                                                | 0.967        | 0.392 | 0.290    | 48 | 0.930    | 0.476 | 0.310    | 12 |
| 4                                                | 0.959        | 0.417 | 0.283    | 48 | 0.980    | 0.362 | 0.315    | 12 |
| 5                                                | 0.966        | 0.369 | 0.265    | 48 | 0.956    | 0.527 | 0.383    | 12 |
| QM B3LYP 6-31G*/AIM/OPENBABEL NO-OPT $R^2=0.963$ |              |       |          |    |          |       |          |    |
| 1                                                | 0.957        | 0.426 | 0.343    | 48 | 0.974    | 0.348 | 0.284    | 12 |
| 2                                                | 0.972        | 0.342 | 0.269    | 48 | 0.952    | 0.702 | 0.587    | 12 |
| 3                                                | 0.961        | 0.395 | 0.321    | 48 | 0.964    | 0.460 | 0.361    | 12 |
| 4                                                | 0.960        | 0.406 | 0.313    | 48 | 0.961    | 0.443 | 0.363    | 12 |
| 5                                                | 0.961        | 0.427 | 0.342    | 48 | 0.945    | 0.349 | 0.283    | 12 |
| QM B3LYP 6-31G*/AIM/OPENBABEL MM-OPT $R^2=0.961$ |              |       |          |    |          |       |          |    |

Table S5: Cross-validation results.

| Fold                                             | Training set |       |          |    | Test set |       |          |    |
|--------------------------------------------------|--------------|-------|----------|----|----------|-------|----------|----|
|                                                  | $R^2$        | RMSE  | $\Delta$ | N  | $Q^2$    | RMSE  | $\Delta$ | N  |
| 1                                                | 0.956        | 0.434 | 0.350    | 48 | 0.976    | 0.341 | 0.274    | 12 |
| 2                                                | 0.971        | 0.344 | 0.270    | 48 | 0.947    | 0.685 | 0.570    | 12 |
| 3                                                | 0.959        | 0.403 | 0.323    | 48 | 0.963    | 0.464 | 0.376    | 12 |
| 4                                                | 0.957        | 0.419 | 0.324    | 48 | 0.965    | 0.413 | 0.350    | 12 |
| 5                                                | 0.960        | 0.433 | 0.341    | 48 | 0.940    | 0.366 | 0.296    | 12 |
| QM B3LYP 6-31G*/MPA/RDKIT MM-OPT $R^2=0.961$     |              |       |          |    |          |       |          |    |
| 1                                                | 0.966        | 0.370 | 0.276    | 48 | 0.957    | 0.557 | 0.413    | 12 |
| 2                                                | 0.962        | 0.424 | 0.319    | 48 | 0.963    | 0.394 | 0.293    | 12 |
| 3                                                | 0.964        | 0.409 | 0.301    | 48 | 0.931    | 0.452 | 0.363    | 12 |
| 4                                                | 0.957        | 0.428 | 0.315    | 48 | 0.975    | 0.360 | 0.306    | 12 |
| 5                                                | 0.963        | 0.384 | 0.283    | 48 | 0.965    | 0.573 | 0.382    | 12 |
| QM B3LYP 6-31G*/MPA/OPENBABEL NO-OPT $R^2=0.961$ |              |       |          |    |          |       |          |    |
| 1                                                | 0.957        | 0.417 | 0.316    | 48 | 0.976    | 0.469 | 0.341    | 12 |
| 2                                                | 0.967        | 0.396 | 0.293    | 48 | 0.949    | 0.517 | 0.381    | 12 |
| 3                                                | 0.966        | 0.396 | 0.307    | 48 | 0.933    | 0.528 | 0.356    | 12 |
| 4                                                | 0.959        | 0.420 | 0.303    | 48 | 0.981    | 0.405 | 0.365    | 12 |
| 5                                                | 0.960        | 0.399 | 0.300    | 48 | 0.964    | 0.464 | 0.336    | 12 |
| QM HF STO-3G/MPA/OPENBABEL MM-OPT $R^2=0.961$    |              |       |          |    |          |       |          |    |
| 1                                                | 0.963        | 0.386 | 0.283    | 48 | 0.962    | 0.536 | 0.429    | 12 |
| 2                                                | 0.970        | 0.379 | 0.283    | 48 | 0.931    | 0.567 | 0.409    | 12 |
| 3                                                | 0.973        | 0.352 | 0.266    | 48 | 0.507    | 1.691 | 0.735    | 12 |
| 4                                                | 0.956        | 0.434 | 0.324    | 48 | 0.989    | 0.344 | 0.318    | 12 |
| 5                                                | 0.952        | 0.437 | 0.331    | 48 | 0.984    | 0.310 | 0.240    | 12 |
| QM B3LYP 6-31G*/NPA/NCI NO-OPT $R^2=0.960$       |              |       |          |    |          |       |          |    |
| 1                                                | 0.966        | 0.369 | 0.303    | 48 | 0.943    | 0.685 | 0.580    | 12 |
| 2                                                | 0.962        | 0.422 | 0.336    | 48 | 0.940    | 0.419 | 0.338    | 12 |
| 3                                                | 0.963        | 0.418 | 0.331    | 48 | 0.941    | 0.425 | 0.366    | 12 |
| 4                                                | 0.955        | 0.438 | 0.351    | 48 | 0.985    | 0.317 | 0.247    | 12 |
| 5                                                | 0.958        | 0.407 | 0.328    | 48 | 0.965    | 0.453 | 0.351    | 12 |
| QM HF STO-3G/MPA/PUBCHEM NO-OPT $R^2=0.960$      |              |       |          |    |          |       |          |    |
| 1                                                | 0.960        | 0.401 | 0.309    | 48 | 0.958    | 0.535 | 0.395    | 12 |
| 2                                                | 0.963        | 0.418 | 0.323    | 48 | 0.954    | 0.441 | 0.361    | 12 |
| 3                                                | 0.963        | 0.415 | 0.303    | 48 | 0.943    | 0.450 | 0.348    | 12 |
| 4                                                | 0.953        | 0.450 | 0.348    | 48 | 0.988    | 0.252 | 0.187    | 12 |
| 5                                                | 0.966        | 0.369 | 0.298    | 48 | 0.943    | 0.605 | 0.448    | 12 |
| QM B3LYP 6-31G*/NPA/NCI MM-OPT $R^2=0.959$       |              |       |          |    |          |       |          |    |
| 1                                                | 0.960        | 0.402 | 0.312    | 48 | 0.866    | 1.110 | 0.694    | 12 |
| 2                                                | 0.961        | 0.429 | 0.337    | 48 | 0.954    | 0.415 | 0.363    | 12 |
| 3                                                | 0.962        | 0.423 | 0.344    | 48 | 0.942    | 0.417 | 0.306    | 12 |
| 4                                                | 0.955        | 0.439 | 0.347    | 48 | 0.981    | 0.343 | 0.277    | 12 |
| 5                                                | 0.969        | 0.351 | 0.266    | 48 | 0.944    | 0.661 | 0.536    | 12 |
| QM B3LYP 6-31G*/NPA/OPENBABEL MM-OPT $R^2=0.959$ |              |       |          |    |          |       |          |    |
| 1                                                | 0.961        | 0.396 | 0.330    | 48 | 0.953    | 0.582 | 0.407    | 12 |
| 2                                                | 0.960        | 0.436 | 0.337    | 48 | 0.962    | 0.375 | 0.305    | 12 |
| 3                                                | 0.967        | 0.394 | 0.303    | 48 | 0.935    | 0.552 | 0.417    | 12 |
| 4                                                | 0.958        | 0.423 | 0.327    | 48 | 0.967    | 0.420 | 0.341    | 12 |
| 5                                                | 0.956        | 0.419 | 0.327    | 48 | 0.967    | 0.437 | 0.328    | 12 |
| QM HF STO-3G/MPA/NCI MM-OPT $R^2=0.958$          |              |       |          |    |          |       |          |    |
| 1                                                | 0.959        | 0.405 | 0.303    | 48 | 0.950    | 0.614 | 0.484    | 12 |
| 2                                                | 0.965        | 0.404 | 0.299    | 48 | 0.905    | 0.556 | 0.399    | 12 |
| 3                                                | 0.962        | 0.423 | 0.322    | 48 | 0.935    | 0.461 | 0.348    | 12 |
| 4                                                | 0.954        | 0.445 | 0.334    | 48 | 0.980    | 0.369 | 0.324    | 12 |
| 5                                                | 0.953        | 0.430 | 0.322    | 48 | 0.974    | 0.429 | 0.315    | 12 |
| QM B3LYP 6-31G*/NPA/OPENBABEL NO-OPT $R^2=0.957$ |              |       |          |    |          |       |          |    |
| 1                                                | 0.956        | 0.423 | 0.347    | 48 | 0.957    | 0.528 | 0.374    | 12 |
| 2                                                | 0.956        | 0.454 | 0.347    | 48 | 0.968    | 0.337 | 0.291    | 12 |
| 3                                                | 0.964        | 0.408 | 0.320    | 48 | 0.939    | 0.544 | 0.416    | 12 |
| 4                                                | 0.959        | 0.418 | 0.324    | 48 | 0.952    | 0.491 | 0.394    | 12 |
| 5                                                | 0.957        | 0.415 | 0.318    | 48 | 0.957    | 0.546 | 0.413    | 12 |

Table S5: Cross-validation results.

| Fold                                             | Training set |       |          |    | Test set |       |          |    |
|--------------------------------------------------|--------------|-------|----------|----|----------|-------|----------|----|
|                                                  | $R^2$        | RMSE  | $\Delta$ | N  | $Q^2$    | RMSE  | $\Delta$ | N  |
| QM B3LYP 6-31G*/MPA/OPENBABEL QM-OPT $R^2=0.957$ |              |       |          |    |          |       |          |    |
| 1                                                | 0.953        | 0.436 | 0.313    | 48 | 0.971    | 0.431 | 0.326    | 12 |
| 2                                                | 0.961        | 0.428 | 0.323    | 48 | 0.951    | 0.479 | 0.367    | 12 |
| 3                                                | 0.963        | 0.417 | 0.315    | 48 | 0.917    | 0.500 | 0.367    | 12 |
| 4                                                | 0.957        | 0.431 | 0.314    | 48 | 0.963    | 0.446 | 0.380    | 12 |
| 5                                                | 0.954        | 0.428 | 0.312    | 48 | 0.967    | 0.491 | 0.297    | 12 |
| QM B3LYP 6-31G*/NPA/OPENBABEL QM-OPT $R^2=0.956$ |              |       |          |    |          |       |          |    |
| 1                                                | 0.954        | 0.430 | 0.328    | 48 | 0.967    | 0.484 | 0.387    | 12 |
| 2                                                | 0.957        | 0.451 | 0.361    | 48 | 0.957    | 0.392 | 0.325    | 12 |
| 3                                                | 0.960        | 0.432 | 0.344    | 48 | 0.930    | 0.461 | 0.371    | 12 |
| 4                                                | 0.954        | 0.446 | 0.361    | 48 | 0.970    | 0.401 | 0.331    | 12 |
| 5                                                | 0.960        | 0.397 | 0.328    | 48 | 0.955    | 0.605 | 0.442    | 12 |
| QM HF STO-3G/MPA/OPENBABEL QM-OPT $R^2=0.955$    |              |       |          |    |          |       |          |    |
| 1                                                | 0.955        | 0.426 | 0.300    | 48 | 0.957    | 0.517 | 0.398    | 12 |
| 2                                                | 0.964        | 0.415 | 0.292    | 48 | 0.929    | 0.573 | 0.443    | 12 |
| 3                                                | 0.964        | 0.410 | 0.306    | 48 | 0.595    | 1.365 | 0.661    | 12 |
| 4                                                | 0.950        | 0.463 | 0.331    | 48 | 0.982    | 0.363 | 0.312    | 12 |
| 5                                                | 0.950        | 0.446 | 0.336    | 48 | 0.971    | 0.460 | 0.246    | 12 |
| QM HF STO-3G/MPA/OPENBABEL NO-OPT $R^2=0.955$    |              |       |          |    |          |       |          |    |
| 1                                                | 0.954        | 0.429 | 0.320    | 48 | 0.960    | 0.525 | 0.429    | 12 |
| 2                                                | 0.965        | 0.406 | 0.307    | 48 | 0.907    | 0.615 | 0.450    | 12 |
| 3                                                | 0.972        | 0.359 | 0.273    | 48 | 0.467    | 1.816 | 0.773    | 12 |
| 4                                                | 0.949        | 0.468 | 0.360    | 48 | 0.989    | 0.355 | 0.319    | 12 |
| 5                                                | 0.947        | 0.457 | 0.352    | 48 | 0.975    | 0.416 | 0.307    | 12 |
| QM B3LYP 6-31G*/NPA/FROG2 QM-OPT $R^2=0.953$     |              |       |          |    |          |       |          |    |
| 1                                                | 0.957        | 0.414 | 0.274    | 48 | 0.935    | 0.658 | 0.483    | 12 |
| 2                                                | 0.967        | 0.394 | 0.302    | 48 | 0.869    | 0.682 | 0.398    | 12 |
| 3                                                | 0.952        | 0.474 | 0.340    | 48 | 0.956    | 0.361 | 0.289    | 12 |
| 4                                                | 0.946        | 0.481 | 0.347    | 48 | 0.983    | 0.326 | 0.298    | 12 |
| 5                                                | 0.950        | 0.445 | 0.319    | 48 | 0.963    | 0.500 | 0.404    | 12 |
| QM B3LYP 6-31G*/MPA/PUBCHEM NO-OPT $R^2=0.950$   |              |       |          |    |          |       |          |    |
| 1                                                | 0.955        | 0.427 | 0.297    | 48 | 0.932    | 0.640 | 0.470    | 12 |
| 2                                                | 0.947        | 0.498 | 0.337    | 48 | 0.956    | 0.374 | 0.254    | 12 |
| 3                                                | 0.950        | 0.484 | 0.328    | 48 | 0.947    | 0.404 | 0.276    | 12 |
| 4                                                | 0.944        | 0.490 | 0.350    | 48 | 0.979    | 0.421 | 0.335    | 12 |
| 5                                                | 0.970        | 0.344 | 0.265    | 48 | 0.877    | 0.901 | 0.589    | 12 |
| QM B3LYP 6-31G*/AIM/RDKIT MM-OPT $R^2=0.950$     |              |       |          |    |          |       |          |    |
| 1                                                | 0.948        | 0.469 | 0.374    | 48 | 0.930    | 0.538 | 0.362    | 12 |
| 2                                                | 0.961        | 0.398 | 0.301    | 48 | 0.945    | 0.794 | 0.671    | 12 |
| 3                                                | 0.948        | 0.452 | 0.358    | 48 | 0.963    | 0.572 | 0.444    | 12 |
| 4                                                | 0.947        | 0.466 | 0.367    | 48 | 0.937    | 0.555 | 0.446    | 12 |
| 5                                                | 0.947        | 0.494 | 0.388    | 48 | 0.949    | 0.348 | 0.300    | 12 |
| QM HF STO-3G/MPA/RDKIT MM-OPT $R^2=0.947$        |              |       |          |    |          |       |          |    |
| 1                                                | 0.952        | 0.441 | 0.313    | 48 | 0.940    | 0.650 | 0.451    | 12 |
| 2                                                | 0.955        | 0.459 | 0.343    | 48 | 0.879    | 0.610 | 0.441    | 12 |
| 3                                                | 0.962        | 0.419 | 0.302    | 48 | 0.525    | 1.542 | 0.834    | 12 |
| 4                                                | 0.939        | 0.511 | 0.382    | 48 | 0.981    | 0.350 | 0.292    | 12 |
| 5                                                | 0.939        | 0.492 | 0.358    | 48 | 0.973    | 0.460 | 0.360    | 12 |
| QM HF STO-3G/MPA/NCI NO-OPT $R^2=0.947$          |              |       |          |    |          |       |          |    |
| 1                                                | 0.955        | 0.425 | 0.316    | 48 | 0.930    | 0.667 | 0.504    | 12 |
| 2                                                | 0.955        | 0.463 | 0.341    | 48 | 0.898    | 0.562 | 0.410    | 12 |
| 3                                                | 0.949        | 0.486 | 0.352    | 48 | 0.920    | 0.491 | 0.400    | 12 |
| 4                                                | 0.939        | 0.512 | 0.378    | 48 | 0.988    | 0.339 | 0.311    | 12 |
| 5                                                | 0.939        | 0.492 | 0.374    | 48 | 0.970    | 0.440 | 0.346    | 12 |
| QM B3LYP 6-31G*/MPA/RDKIT QM-OPT $R^2=0.944$     |              |       |          |    |          |       |          |    |
| 1                                                | 0.941        | 0.487 | 0.357    | 48 | 0.952    | 0.517 | 0.406    | 12 |
| 2                                                | 0.948        | 0.496 | 0.363    | 48 | 0.909    | 0.555 | 0.442    | 12 |
| 3                                                | 0.953        | 0.467 | 0.344    | 48 | 0.858    | 0.678 | 0.549    | 12 |
| 4                                                | 0.935        | 0.526 | 0.401    | 48 | 0.982    | 0.345 | 0.269    | 12 |

Table S5: Cross-validation results.

| Fold                                             | Training set |       |          |    | Test set |       |          |    |
|--------------------------------------------------|--------------|-------|----------|----|----------|-------|----------|----|
|                                                  | $R^2$        | RMSE  | $\Delta$ | N  | $Q^2$    | RMSE  | $\Delta$ | N  |
| 5                                                | 0.955        | 0.423 | 0.312    | 48 | 0.926    | 0.812 | 0.588    | 12 |
| QM HF STO-3G/MPA/PUBCHEM QM-OPT $R^2=0.943$      |              |       |          |    |          |       |          |    |
| 1                                                | 0.935        | 0.511 | 0.366    | 48 | 0.958    | 0.508 | 0.398    | 12 |
| 2                                                | 0.947        | 0.498 | 0.364    | 48 | 0.901    | 0.531 | 0.468    | 12 |
| 3                                                | 0.947        | 0.495 | 0.350    | 48 | 0.912    | 0.541 | 0.361    | 12 |
| 4                                                | 0.939        | 0.512 | 0.377    | 48 | 0.965    | 0.435 | 0.304    | 12 |
| 5                                                | 0.958        | 0.410 | 0.318    | 48 | 0.903    | 0.772 | 0.492    | 12 |
| QM B3LYP 6-31G*/NPA/RDKit MM-OPT $R^2=0.941$     |              |       |          |    |          |       |          |    |
| 1                                                | 0.940        | 0.490 | 0.388    | 48 | 0.946    | 0.589 | 0.518    | 12 |
| 2                                                | 0.948        | 0.496 | 0.408    | 48 | 0.888    | 0.595 | 0.473    | 12 |
| 3                                                | 0.952        | 0.472 | 0.366    | 48 | 0.835    | 0.728 | 0.626    | 12 |
| 4                                                | 0.933        | 0.535 | 0.444    | 48 | 0.967    | 0.386 | 0.263    | 12 |
| 5                                                | 0.944        | 0.469 | 0.385    | 48 | 0.933    | 0.695 | 0.565    | 12 |
| QM B3LYP 6-31G*/AIM/FROG2 QM-OPT $R^2=0.939$     |              |       |          |    |          |       |          |    |
| 1                                                | 0.931        | 0.543 | 0.376    | 48 | 0.937    | 0.556 | 0.427    | 12 |
| 2                                                | 0.954        | 0.433 | 0.320    | 48 | 0.953    | 0.997 | 0.730    | 12 |
| 3                                                | 0.925        | 0.544 | 0.401    | 48 | 0.947    | 0.565 | 0.376    | 12 |
| 4                                                | 0.928        | 0.544 | 0.386    | 48 | 0.950    | 0.560 | 0.399    | 12 |
| 5                                                | 0.929        | 0.574 | 0.406    | 48 | 0.975    | 0.392 | 0.300    | 12 |
| QM B3LYP 6-31G*/MPA/BALLOON NO-OPT $R^2=0.939$   |              |       |          |    |          |       |          |    |
| 1                                                | 0.941        | 0.488 | 0.363    | 48 | 0.947    | 0.634 | 0.443    | 12 |
| 2                                                | 0.937        | 0.546 | 0.391    | 48 | 0.953    | 0.389 | 0.303    | 12 |
| 3                                                | 0.950        | 0.485 | 0.346    | 48 | 0.888    | 0.704 | 0.528    | 12 |
| 4                                                | 0.943        | 0.496 | 0.358    | 48 | 0.916    | 0.618 | 0.420    | 12 |
| 5                                                | 0.933        | 0.515 | 0.365    | 48 | 0.948    | 0.554 | 0.411    | 12 |
| QM B3LYP 6-31G*/AIM/FROG2 MM-OPT $R^2=0.938$     |              |       |          |    |          |       |          |    |
| 1                                                | 0.934        | 0.528 | 0.376    | 48 | 0.961    | 0.554 | 0.467    | 12 |
| 2                                                | 0.968        | 0.363 | 0.278    | 48 | 0.887    | 1.106 | 0.744    | 12 |
| 3                                                | 0.927        | 0.536 | 0.385    | 48 | 0.954    | 0.520 | 0.438    | 12 |
| 4                                                | 0.932        | 0.530 | 0.389    | 48 | 0.943    | 0.581 | 0.389    | 12 |
| 5                                                | 0.930        | 0.571 | 0.419    | 48 | 0.970    | 0.280 | 0.236    | 12 |
| QM B3LYP 6-31G*/MPA/PUBCHEM QM-OPT $R^2=0.936$   |              |       |          |    |          |       |          |    |
| 1                                                | 0.929        | 0.534 | 0.393    | 48 | 0.949    | 0.554 | 0.433    | 12 |
| 2                                                | 0.935        | 0.554 | 0.394    | 48 | 0.954    | 0.424 | 0.298    | 12 |
| 3                                                | 0.939        | 0.535 | 0.368    | 48 | 0.921    | 0.501 | 0.406    | 12 |
| 4                                                | 0.929        | 0.550 | 0.396    | 48 | 0.969    | 0.439 | 0.387    | 12 |
| 5                                                | 0.960        | 0.397 | 0.322    | 48 | 0.880    | 0.900 | 0.597    | 12 |
| QM B3LYP 6-31G*/AIM/OPENBABEL QM-OPT $R^2=0.936$ |              |       |          |    |          |       |          |    |
| 1                                                | 0.921        | 0.580 | 0.422    | 48 | 0.973    | 0.473 | 0.380    | 12 |
| 2                                                | 0.960        | 0.403 | 0.311    | 48 | 0.924    | 1.116 | 0.819    | 12 |
| 3                                                | 0.928        | 0.534 | 0.409    | 48 | 0.908    | 0.703 | 0.488    | 12 |
| 4                                                | 0.928        | 0.544 | 0.385    | 48 | 0.946    | 0.647 | 0.480    | 12 |
| 5                                                | 0.927        | 0.581 | 0.418    | 48 | 0.955    | 0.450 | 0.377    | 12 |
| QM B3LYP 6-31G*/AIM/NCI MM-OPT $R^2=0.936$       |              |       |          |    |          |       |          |    |
| 1                                                | 0.940        | 0.505 | 0.387    | 48 | 0.923    | 0.580 | 0.412    | 12 |
| 2                                                | 0.955        | 0.429 | 0.300    | 48 | 0.918    | 0.901 | 0.731    | 12 |
| 3                                                | 0.928        | 0.535 | 0.401    | 48 | 0.967    | 0.461 | 0.318    | 12 |
| 4                                                | 0.938        | 0.503 | 0.356    | 48 | 0.929    | 0.612 | 0.467    | 12 |
| 5                                                | 0.934        | 0.553 | 0.418    | 48 | 0.966    | 0.344 | 0.297    | 12 |
| QM HF STO-3G/MPA/RDKit QM-OPT $R^2=0.935$        |              |       |          |    |          |       |          |    |
| 1                                                | 0.934        | 0.514 | 0.346    | 48 | 0.939    | 0.595 | 0.447    | 12 |
| 2                                                | 0.943        | 0.520 | 0.361    | 48 | 0.873    | 0.623 | 0.479    | 12 |
| 3                                                | 0.957        | 0.446 | 0.337    | 48 | 0.507    | 1.608 | 0.972    | 12 |
| 4                                                | 0.924        | 0.572 | 0.415    | 48 | 0.983    | 0.338 | 0.287    | 12 |
| 5                                                | 0.933        | 0.516 | 0.373    | 48 | 0.944    | 0.655 | 0.461    | 12 |
| QM B3LYP 6-31G*/NPA/PUBCHEM NO-OPT $R^2=0.935$   |              |       |          |    |          |       |          |    |
| 1                                                | 0.931        | 0.525 | 0.396    | 48 | 0.957    | 0.638 | 0.504    | 12 |
| 2                                                | 0.940        | 0.532 | 0.394    | 48 | 0.906    | 0.542 | 0.469    | 12 |
| 3                                                | 0.941        | 0.524 | 0.401    | 48 | 0.886    | 0.621 | 0.434    | 12 |

Table S5: Cross-validation results.

| Fold                                                 | Training set |       |          |    | Test set |       |          |    |
|------------------------------------------------------|--------------|-------|----------|----|----------|-------|----------|----|
|                                                      | $R^2$        | RMSE  | $\Delta$ | N  | $Q^2$    | RMSE  | $\Delta$ | N  |
| 4                                                    | 0.927        | 0.558 | 0.434    | 48 | 0.952    | 0.478 | 0.304    | 12 |
| 5                                                    | 0.955        | 0.424 | 0.343    | 48 | 0.862    | 0.933 | 0.632    | 12 |
| QM B3LYP 6-31G*/MPA/NCI QM-OPT $R^2=0.935$           |              |       |          |    |          |       |          |    |
| 1                                                    | 0.929        | 0.532 | 0.372    | 48 | 0.942    | 0.626 | 0.470    | 12 |
| 2                                                    | 0.940        | 0.534 | 0.402    | 48 | 0.934    | 0.546 | 0.427    | 12 |
| 3                                                    | 0.949        | 0.487 | 0.370    | 48 | 0.831    | 0.706 | 0.533    | 12 |
| 4                                                    | 0.930        | 0.547 | 0.405    | 48 | 0.953    | 0.477 | 0.373    | 12 |
| 5                                                    | 0.930        | 0.527 | 0.400    | 48 | 0.952    | 0.563 | 0.370    | 12 |
| QM B3LYP 6-31G*/NPA/RDKit MM-OPT $R^2=0.934$         |              |       |          |    |          |       |          |    |
| 1                                                    | 0.929        | 0.533 | 0.396    | 48 | 0.946    | 0.559 | 0.474    | 12 |
| 2                                                    | 0.936        | 0.552 | 0.428    | 48 | 0.919    | 0.479 | 0.389    | 12 |
| 3                                                    | 0.953        | 0.467 | 0.366    | 48 | 0.802    | 0.854 | 0.604    | 12 |
| 4                                                    | 0.925        | 0.567 | 0.438    | 48 | 0.970    | 0.385 | 0.299    | 12 |
| 5                                                    | 0.932        | 0.517 | 0.392    | 48 | 0.940    | 0.594 | 0.468    | 12 |
| QM B3LYP 6-31G*/AIM/RDKit MM-OPT $R^2=0.934$         |              |       |          |    |          |       |          |    |
| 1                                                    | 0.923        | 0.572 | 0.425    | 48 | 0.986    | 0.539 | 0.397    | 12 |
| 2                                                    | 0.946        | 0.469 | 0.292    | 48 | 0.963    | 0.996 | 0.767    | 12 |
| 3                                                    | 0.924        | 0.548 | 0.438    | 48 | 0.927    | 0.618 | 0.489    | 12 |
| 4                                                    | 0.935        | 0.516 | 0.379    | 48 | 0.900    | 0.764 | 0.574    | 12 |
| 5                                                    | 0.930        | 0.569 | 0.449    | 48 | 0.922    | 0.532 | 0.394    | 12 |
| QM B3LYP 6-31G*/NPA/BALLOON MM-OPT $R^2=0.933$       |              |       |          |    |          |       |          |    |
| 1                                                    | 0.947        | 0.463 | 0.382    | 48 | 0.871    | 0.894 | 0.574    | 12 |
| 2                                                    | 0.938        | 0.541 | 0.428    | 48 | 0.897    | 0.613 | 0.529    | 12 |
| 3                                                    | 0.934        | 0.556 | 0.437    | 48 | 0.947    | 0.466 | 0.348    | 12 |
| 4                                                    | 0.931        | 0.543 | 0.421    | 48 | 0.955    | 0.528 | 0.423    | 12 |
| 5                                                    | 0.935        | 0.507 | 0.416    | 48 | 0.942    | 0.712 | 0.565    | 12 |
| QM B3LYP 6-31G*/NPA/RDKit QM-OPT $R^2=0.933$         |              |       |          |    |          |       |          |    |
| 1                                                    | 0.927        | 0.541 | 0.403    | 48 | 0.945    | 0.558 | 0.472    | 12 |
| 2                                                    | 0.940        | 0.531 | 0.411    | 48 | 0.816    | 0.712 | 0.593    | 12 |
| 3                                                    | 0.953        | 0.468 | 0.375    | 48 | 0.794    | 0.888 | 0.701    | 12 |
| 4                                                    | 0.921        | 0.581 | 0.466    | 48 | 0.974    | 0.345 | 0.265    | 12 |
| 5                                                    | 0.937        | 0.500 | 0.386    | 48 | 0.935    | 0.775 | 0.604    | 12 |
| QM B3LYP 6-31G*/MPA/FROG2 MM-OPT $R^2=0.931$         |              |       |          |    |          |       |          |    |
| 1                                                    | 0.924        | 0.552 | 0.412    | 48 | 0.950    | 0.640 | 0.538    | 12 |
| 2                                                    | 0.942        | 0.525 | 0.405    | 48 | 0.846    | 0.647 | 0.383    | 12 |
| 3                                                    | 0.940        | 0.529 | 0.393    | 48 | 0.866    | 0.627 | 0.448    | 12 |
| 4                                                    | 0.932        | 0.539 | 0.391    | 48 | 0.929    | 0.588 | 0.458    | 12 |
| 5                                                    | 0.925        | 0.545 | 0.408    | 48 | 0.957    | 0.595 | 0.463    | 12 |
| QM HF STO-3G*/MPA/RDKit MM-OPT $R^2=0.931$           |              |       |          |    |          |       |          |    |
| 1                                                    | 0.924        | 0.551 | 0.393    | 48 | 0.950    | 0.550 | 0.462    | 12 |
| 2                                                    | 0.945        | 0.509 | 0.361    | 48 | 0.792    | 0.791 | 0.546    | 12 |
| 3                                                    | 0.972        | 0.361 | 0.286    | 48 | 0.310    | 2.250 | 1.128    | 12 |
| 4                                                    | 0.921        | 0.580 | 0.434    | 48 | 0.974    | 0.410 | 0.350    | 12 |
| 5                                                    | 0.913        | 0.585 | 0.444    | 48 | 0.978    | 0.365 | 0.249    | 12 |
| QM B3LYP 6-31G*/NPA/PUBCHEM MM-OPT $R^2=0.927$       |              |       |          |    |          |       |          |    |
| 1                                                    | 0.917        | 0.579 | 0.447    | 48 | 0.952    | 0.516 | 0.387    | 12 |
| 2                                                    | 0.936        | 0.550 | 0.416    | 48 | 0.881    | 0.636 | 0.549    | 12 |
| 3                                                    | 0.942        | 0.519 | 0.429    | 48 | 0.818    | 0.773 | 0.531    | 12 |
| 4                                                    | 0.919        | 0.589 | 0.464    | 48 | 0.965    | 0.448 | 0.347    | 12 |
| 5                                                    | 0.930        | 0.526 | 0.416    | 48 | 0.921    | 0.764 | 0.550    | 12 |
| Chavez2006 B3LYP 6-31G*/MPA/NCI MM-OPT $R^2=0.926$   |              |       |          |    |          |       |          |    |
| 1                                                    | 0.920        | 0.567 | 0.436    | 48 | 0.981    | 0.641 | 0.505    | 12 |
| 2                                                    | 0.946        | 0.507 | 0.412    | 48 | 0.780    | 0.778 | 0.566    | 12 |
| 3                                                    | 0.933        | 0.558 | 0.410    | 48 | 0.886    | 0.609 | 0.493    | 12 |
| 4                                                    | 0.921        | 0.581 | 0.460    | 48 | 0.937    | 0.568 | 0.404    | 12 |
| 5                                                    | 0.918        | 0.569 | 0.437    | 48 | 0.950    | 0.567 | 0.461    | 12 |
| Bult2002-npa B3LYP 6-31G*/NPA/NCI MM-OPT $R^2=0.926$ |              |       |          |    |          |       |          |    |
| 1                                                    | 0.922        | 0.560 | 0.447    | 48 | 0.974    | 0.688 | 0.543    | 12 |
| 2                                                    | 0.943        | 0.521 | 0.419    | 48 | 0.789    | 0.760 | 0.536    | 12 |

Table S5: Cross-validation results.

| Fold                                                     | Training set |       |          |    | Test set |       |          |    |
|----------------------------------------------------------|--------------|-------|----------|----|----------|-------|----------|----|
|                                                          | $R^2$        | RMSE  | $\Delta$ | N  | $Q^2$    | RMSE  | $\Delta$ | N  |
| 3                                                        | 0.935        | 0.552 | 0.418    | 48 | 0.857    | 0.666 | 0.573    | 12 |
| 4                                                        | 0.925        | 0.567 | 0.452    | 48 | 0.918    | 0.642 | 0.479    | 12 |
| 5                                                        | 0.917        | 0.573 | 0.448    | 48 | 0.957    | 0.558 | 0.469    | 12 |
| Bult2002-mpa B3LYP 6-31G*/NPA/PUBCHEM QM-OPT $R^2=0.925$ |              |       |          |    |          |       |          |    |
| 1                                                        | 0.919        | 0.571 | 0.435    | 48 | 0.957    | 0.657 | 0.531    | 12 |
| 2                                                        | 0.952        | 0.475 | 0.387    | 48 | 0.743    | 0.881 | 0.716    | 12 |
| 3                                                        | 0.924        | 0.595 | 0.457    | 48 | 0.929    | 0.465 | 0.402    | 12 |
| 4                                                        | 0.920        | 0.584 | 0.464    | 48 | 0.930    | 0.582 | 0.434    | 12 |
| 5                                                        | 0.918        | 0.571 | 0.446    | 48 | 0.949    | 0.641 | 0.501    | 12 |
| Bult2002-mpa B3LYP 6-31G*/NPA/NCI QM-OPT $R^2=0.925$     |              |       |          |    |          |       |          |    |
| 1                                                        | 0.919        | 0.569 | 0.453    | 48 | 0.976    | 0.676 | 0.523    | 12 |
| 2                                                        | 0.943        | 0.520 | 0.425    | 48 | 0.783    | 0.774 | 0.574    | 12 |
| 3                                                        | 0.929        | 0.574 | 0.429    | 48 | 0.897    | 0.572 | 0.485    | 12 |
| 4                                                        | 0.926        | 0.565 | 0.444    | 48 | 0.911    | 0.666 | 0.477    | 12 |
| 5                                                        | 0.916        | 0.578 | 0.445    | 48 | 0.957    | 0.562 | 0.445    | 12 |
| Chavez2006 B3LYP 6-31G*/MPA/NCI QM-OPT $R^2=0.924$       |              |       |          |    |          |       |          |    |
| 1                                                        | 0.918        | 0.573 | 0.441    | 48 | 0.984    | 0.673 | 0.504    | 12 |
| 2                                                        | 0.945        | 0.509 | 0.417    | 48 | 0.769    | 0.799 | 0.598    | 12 |
| 3                                                        | 0.928        | 0.580 | 0.433    | 48 | 0.908    | 0.550 | 0.459    | 12 |
| 4                                                        | 0.921        | 0.581 | 0.453    | 48 | 0.932    | 0.594 | 0.440    | 12 |
| 5                                                        | 0.915        | 0.580 | 0.441    | 48 | 0.952    | 0.557 | 0.439    | 12 |
| Svob2007-chal2 HF STO-3G/MPA/RDKit MM-OPT $R^2=0.923$    |              |       |          |    |          |       |          |    |
| 1                                                        | 0.911        | 0.599 | 0.435    | 48 | 0.954    | 0.518 | 0.356    | 12 |
| 2                                                        | 0.937        | 0.547 | 0.398    | 48 | 0.798    | 0.741 | 0.592    | 12 |
| 3                                                        | 0.925        | 0.592 | 0.434    | 48 | 0.903    | 0.578 | 0.422    | 12 |
| 4                                                        | 0.919        | 0.591 | 0.442    | 48 | 0.927    | 0.571 | 0.420    | 12 |
| 5                                                        | 0.932        | 0.517 | 0.379    | 48 | 0.905    | 0.862 | 0.620    | 12 |
| QM B3LYP 6-31G*/AIM/RDKit QM-OPT $R^2=0.922$             |              |       |          |    |          |       |          |    |
| 1                                                        | 0.906        | 0.632 | 0.453    | 48 | 0.979    | 0.527 | 0.373    | 12 |
| 2                                                        | 0.939        | 0.501 | 0.349    | 48 | 0.940    | 1.065 | 0.805    | 12 |
| 3                                                        | 0.909        | 0.599 | 0.453    | 48 | 0.920    | 0.693 | 0.491    | 12 |
| 4                                                        | 0.920        | 0.575 | 0.417    | 48 | 0.870    | 0.821 | 0.568    | 12 |
| 5                                                        | 0.919        | 0.613 | 0.457    | 48 | 0.841    | 0.699 | 0.440    | 12 |
| QM B3LYP 6-31G*/NPA/PUBCHEM QM-OPT $R^2=0.922$           |              |       |          |    |          |       |          |    |
| 1                                                        | 0.906        | 0.615 | 0.438    | 48 | 0.968    | 0.485 | 0.410    | 12 |
| 2                                                        | 0.931        | 0.573 | 0.402    | 48 | 0.875    | 0.642 | 0.501    | 12 |
| 3                                                        | 0.925        | 0.590 | 0.419    | 48 | 0.893    | 0.574 | 0.397    | 12 |
| 4                                                        | 0.910        | 0.621 | 0.450    | 48 | 0.966    | 0.414 | 0.324    | 12 |
| 5                                                        | 0.951        | 0.439 | 0.339    | 48 | 0.841    | 1.007 | 0.668    | 12 |
| Chavez2006 B3LYP 6-31G*/MPA/PUBCHEM QM-OPT $R^2=0.921$   |              |       |          |    |          |       |          |    |
| 1                                                        | 0.911        | 0.597 | 0.454    | 48 | 0.975    | 0.629 | 0.514    | 12 |
| 2                                                        | 0.949        | 0.493 | 0.404    | 48 | 0.736    | 0.889 | 0.710    | 12 |
| 3                                                        | 0.920        | 0.612 | 0.471    | 48 | 0.928    | 0.460 | 0.393    | 12 |
| 4                                                        | 0.916        | 0.601 | 0.478    | 48 | 0.933    | 0.560 | 0.409    | 12 |
| 5                                                        | 0.917        | 0.572 | 0.442    | 48 | 0.932    | 0.697 | 0.559    | 12 |
| Svob2007-chal2 HF STO-3G/MPA/FROG2 QM-OPT $R^2=0.921$    |              |       |          |    |          |       |          |    |
| 1                                                        | 0.941        | 0.488 | 0.360    | 48 | 0.817    | 1.034 | 0.673    | 12 |
| 2                                                        | 0.947        | 0.502 | 0.369    | 48 | 0.754    | 0.892 | 0.732    | 12 |
| 3                                                        | 0.924        | 0.597 | 0.420    | 48 | 0.884    | 0.587 | 0.476    | 12 |
| 4                                                        | 0.910        | 0.620 | 0.452    | 48 | 0.956    | 0.456 | 0.367    | 12 |
| 5                                                        | 0.903        | 0.621 | 0.448    | 48 | 0.982    | 0.458 | 0.316    | 12 |
| Chavez2006 B3LYP 6-31G*/MPA/OPENBABEL NO-OPT $R^2=0.920$ |              |       |          |    |          |       |          |    |
| 1                                                        | 0.904        | 0.621 | 0.493    | 48 | 0.963    | 0.485 | 0.352    | 12 |
| 2                                                        | 0.947        | 0.499 | 0.409    | 48 | 0.723    | 0.886 | 0.731    | 12 |
| 3                                                        | 0.923        | 0.599 | 0.474    | 48 | 0.900    | 0.562 | 0.444    | 12 |
| 4                                                        | 0.919        | 0.591 | 0.466    | 48 | 0.918    | 0.632 | 0.477    | 12 |
| 5                                                        | 0.910        | 0.597 | 0.470    | 48 | 0.943    | 0.578 | 0.478    | 12 |
| Chavez2006 B3LYP 6-31G*/MPA/OPENBABEL MM-OPT $R^2=0.919$ |              |       |          |    |          |       |          |    |
| 1                                                        | 0.902        | 0.627 | 0.492    | 48 | 0.967    | 0.475 | 0.347    | 12 |



Table S5: Cross-validation results.

| Fold                                                     | Training set |       |          |    | Test set |       |          |    |
|----------------------------------------------------------|--------------|-------|----------|----|----------|-------|----------|----|
|                                                          | $R^2$        | RMSE  | $\Delta$ | N  | $Q^2$    | RMSE  | $\Delta$ | N  |
| 2                                                        | 0.947        | 0.499 | 0.408    | 48 | 0.718    | 0.894 | 0.734    | 12 |
| 3                                                        | 0.922        | 0.604 | 0.469    | 48 | 0.903    | 0.549 | 0.442    | 12 |
| 4                                                        | 0.919        | 0.591 | 0.468    | 48 | 0.916    | 0.641 | 0.485    | 12 |
| 5                                                        | 0.909        | 0.600 | 0.472    | 48 | 0.942    | 0.586 | 0.477    | 12 |
| Chavez2006 B3LYP 6-31G*/MPA/RDKit QM-OPT $R^2=0.919$     |              |       |          |    |          |       |          |    |
| 1                                                        | 0.909        | 0.603 | 0.470    | 48 | 0.951    | 0.610 | 0.448    | 12 |
| 2                                                        | 0.939        | 0.536 | 0.443    | 48 | 0.772    | 0.815 | 0.650    | 12 |
| 3                                                        | 0.916        | 0.625 | 0.495    | 48 | 0.936    | 0.458 | 0.397    | 12 |
| 4                                                        | 0.919        | 0.589 | 0.459    | 48 | 0.910    | 0.646 | 0.507    | 12 |
| 5                                                        | 0.919        | 0.566 | 0.438    | 48 | 0.914    | 0.802 | 0.593    | 12 |
| Chavez2006 B3LYP 6-31G*/MPA/PUBCHEM NO-OPT $R^2=0.918$   |              |       |          |    |          |       |          |    |
| 1                                                        | 0.903        | 0.623 | 0.465    | 48 | 0.978    | 0.527 | 0.414    | 12 |
| 2                                                        | 0.945        | 0.511 | 0.414    | 48 | 0.734    | 0.888 | 0.725    | 12 |
| 3                                                        | 0.922        | 0.603 | 0.461    | 48 | 0.886    | 0.585 | 0.440    | 12 |
| 4                                                        | 0.914        | 0.606 | 0.473    | 48 | 0.918    | 0.618 | 0.458    | 12 |
| 5                                                        | 0.914        | 0.584 | 0.441    | 48 | 0.934    | 0.671 | 0.535    | 12 |
| Svob2007-chal2 HF STO-3G/MPA/FROG2 MM-OPT $R^2=0.918$    |              |       |          |    |          |       |          |    |
| 1                                                        | 0.930        | 0.530 | 0.395    | 48 | 0.848    | 0.941 | 0.636    | 12 |
| 2                                                        | 0.948        | 0.495 | 0.373    | 48 | 0.745    | 0.947 | 0.771    | 12 |
| 3                                                        | 0.919        | 0.613 | 0.440    | 48 | 0.897    | 0.554 | 0.444    | 12 |
| 4                                                        | 0.907        | 0.633 | 0.477    | 48 | 0.957    | 0.441 | 0.338    | 12 |
| 5                                                        | 0.903        | 0.619 | 0.458    | 48 | 0.972    | 0.518 | 0.379    | 12 |
| Bult2002-npa B3LYP 6-31G*/NPA/FROG2 QM-OPT $R^2=0.918$   |              |       |          |    |          |       |          |    |
| 1                                                        | 0.930        | 0.529 | 0.392    | 48 | 0.803    | 1.088 | 0.663    | 12 |
| 2                                                        | 0.948        | 0.496 | 0.412    | 48 | 0.799    | 0.982 | 0.873    | 12 |
| 3                                                        | 0.921        | 0.608 | 0.481    | 48 | 0.885    | 0.609 | 0.510    | 12 |
| 4                                                        | 0.918        | 0.594 | 0.461    | 48 | 0.907    | 0.682 | 0.519    | 12 |
| 5                                                        | 0.898        | 0.635 | 0.514    | 48 | 0.968    | 0.432 | 0.343    | 12 |
| Bult2002-npa B3LYP 6-31G*/NPA/FROG2 MM-OPT $R^2=0.917$   |              |       |          |    |          |       |          |    |
| 1                                                        | 0.923        | 0.555 | 0.415    | 48 | 0.868    | 0.941 | 0.599    | 12 |
| 2                                                        | 0.948        | 0.495 | 0.413    | 48 | 0.801    | 0.997 | 0.885    | 12 |
| 3                                                        | 0.921        | 0.607 | 0.483    | 48 | 0.882    | 0.613 | 0.519    | 12 |
| 4                                                        | 0.917        | 0.595 | 0.461    | 48 | 0.906    | 0.681 | 0.522    | 12 |
| 5                                                        | 0.898        | 0.636 | 0.518    | 48 | 0.968    | 0.431 | 0.345    | 12 |
| Chavez2006 B3LYP 6-31G*/MPA/PUBCHEM MM-OPT $R^2=0.917$   |              |       |          |    |          |       |          |    |
| 1                                                        | 0.904        | 0.621 | 0.463    | 48 | 0.973    | 0.610 | 0.486    | 12 |
| 2                                                        | 0.945        | 0.510 | 0.418    | 48 | 0.725    | 0.906 | 0.742    | 12 |
| 3                                                        | 0.917        | 0.620 | 0.480    | 48 | 0.912    | 0.512 | 0.399    | 12 |
| 4                                                        | 0.914        | 0.607 | 0.473    | 48 | 0.918    | 0.616 | 0.459    | 12 |
| 5                                                        | 0.912        | 0.589 | 0.452    | 48 | 0.935    | 0.675 | 0.542    | 12 |
| Chavez2006 B3LYP 6-31G*/MPA/OPENBABEL QM-OPT $R^2=0.917$ |              |       |          |    |          |       |          |    |
| 1                                                        | 0.900        | 0.634 | 0.495    | 48 | 0.970    | 0.490 | 0.375    | 12 |
| 2                                                        | 0.946        | 0.505 | 0.415    | 48 | 0.709    | 0.903 | 0.739    | 12 |
| 3                                                        | 0.919        | 0.616 | 0.479    | 48 | 0.907    | 0.530 | 0.447    | 12 |
| 4                                                        | 0.916        | 0.599 | 0.480    | 48 | 0.916    | 0.646 | 0.489    | 12 |
| 5                                                        | 0.908        | 0.605 | 0.476    | 48 | 0.937    | 0.608 | 0.493    | 12 |
| QM HF STO-3G/MPA/BALLOON MM-OPT $R^2=0.917$              |              |       |          |    |          |       |          |    |
| 1                                                        | 0.935        | 0.511 | 0.368    | 48 | 0.859    | 0.936 | 0.643    | 12 |
| 2                                                        | 0.926        | 0.593 | 0.415    | 48 | 0.794    | 0.761 | 0.503    | 12 |
| 3                                                        | 0.941        | 0.522 | 0.372    | 48 | 0.471    | 1.711 | 0.845    | 12 |
| 4                                                        | 0.904        | 0.641 | 0.466    | 48 | 0.977    | 0.404 | 0.363    | 12 |
| 5                                                        | 0.908        | 0.603 | 0.448    | 48 | 0.945    | 0.613 | 0.415    | 12 |
| Chavez2006 B3LYP 6-31G*/MPA/RDKit MM-OPT $R^2=0.917$     |              |       |          |    |          |       |          |    |
| 1                                                        | 0.908        | 0.607 | 0.469    | 48 | 0.953    | 0.626 | 0.462    | 12 |
| 2                                                        | 0.938        | 0.540 | 0.440    | 48 | 0.768    | 0.825 | 0.657    | 12 |
| 3                                                        | 0.914        | 0.632 | 0.504    | 48 | 0.934    | 0.468 | 0.406    | 12 |
| 4                                                        | 0.920        | 0.586 | 0.450    | 48 | 0.896    | 0.691 | 0.525    | 12 |
| 5                                                        | 0.913        | 0.585 | 0.455    | 48 | 0.929    | 0.724 | 0.551    | 12 |
| Bult2002-npa B3LYP 6-31G*/NPA/RDKit QM-OPT $R^2=0.916$   |              |       |          |    |          |       |          |    |

Table S5: Cross-validation results.

| Fold                                                       | Training set |       |          |    | Test set |       |          |    |
|------------------------------------------------------------|--------------|-------|----------|----|----------|-------|----------|----|
|                                                            | $R^2$        | RMSE  | $\Delta$ | N  | $Q^2$    | RMSE  | $\Delta$ | N  |
| 1                                                          | 0.907        | 0.610 | 0.469    | 48 | 0.944    | 0.622 | 0.452    | 12 |
| 2                                                          | 0.931        | 0.569 | 0.465    | 48 | 0.798    | 0.753 | 0.599    | 12 |
| 3                                                          | 0.916        | 0.627 | 0.491    | 48 | 0.924    | 0.526 | 0.446    | 12 |
| 4                                                          | 0.920        | 0.587 | 0.447    | 48 | 0.889    | 0.710 | 0.540    | 12 |
| 5                                                          | 0.916        | 0.576 | 0.450    | 48 | 0.924    | 0.803 | 0.564    | 12 |
| Bult2004-aim B3LYP 6-31G*/AIM/NCI MM-OPT $R^2=0.916$       |              |       |          |    |          |       |          |    |
| 1                                                          | 0.910        | 0.602 | 0.476    | 48 | 0.980    | 0.688 | 0.521    | 12 |
| 2                                                          | 0.936        | 0.548 | 0.445    | 48 | 0.770    | 0.820 | 0.600    | 12 |
| 3                                                          | 0.924        | 0.596 | 0.452    | 48 | 0.864    | 0.678 | 0.564    | 12 |
| 4                                                          | 0.908        | 0.629 | 0.502    | 48 | 0.938    | 0.545 | 0.459    | 12 |
| 5                                                          | 0.910        | 0.596 | 0.463    | 48 | 0.936    | 0.641 | 0.505    | 12 |
| QM HF STO-3G/MPA/BALLOON QM-OPT $R^2=0.915$                |              |       |          |    |          |       |          |    |
| 1                                                          | 0.929        | 0.534 | 0.376    | 48 | 0.884    | 0.867 | 0.619    | 12 |
| 2                                                          | 0.914        | 0.636 | 0.436    | 48 | 0.930    | 0.506 | 0.391    | 12 |
| 3                                                          | 0.936        | 0.545 | 0.409    | 48 | 0.358    | 2.291 | 1.009    | 12 |
| 4                                                          | 0.903        | 0.645 | 0.469    | 48 | 0.979    | 0.453 | 0.409    | 12 |
| 5                                                          | 0.921        | 0.561 | 0.410    | 48 | 0.899    | 0.771 | 0.511    | 12 |
| Bult2002-mpa B3LYP 6-31G*/NPA/PUBCHEM MM-OPT $R^2=0.915$   |              |       |          |    |          |       |          |    |
| 1                                                          | 0.907        | 0.609 | 0.457    | 48 | 0.956    | 0.723 | 0.560    | 12 |
| 2                                                          | 0.941        | 0.526 | 0.425    | 48 | 0.731    | 0.894 | 0.725    | 12 |
| 3                                                          | 0.917        | 0.623 | 0.481    | 48 | 0.902    | 0.551 | 0.427    | 12 |
| 4                                                          | 0.912        | 0.616 | 0.480    | 48 | 0.910    | 0.648 | 0.461    | 12 |
| 5                                                          | 0.908        | 0.605 | 0.478    | 48 | 0.949    | 0.679 | 0.525    | 12 |
| Bult2002-mpa B3LYP 6-31G*/NPA/PUBCHEM NO-OPT $R^2=0.913$   |              |       |          |    |          |       |          |    |
| 1                                                          | 0.900        | 0.634 | 0.475    | 48 | 0.977    | 0.651 | 0.522    | 12 |
| 2                                                          | 0.939        | 0.536 | 0.436    | 48 | 0.728    | 0.897 | 0.743    | 12 |
| 3                                                          | 0.918        | 0.619 | 0.480    | 48 | 0.874    | 0.625 | 0.432    | 12 |
| 4                                                          | 0.910        | 0.620 | 0.485    | 48 | 0.899    | 0.688 | 0.475    | 12 |
| 5                                                          | 0.906        | 0.610 | 0.473    | 48 | 0.947    | 0.683 | 0.552    | 12 |
| QM B3LYP 6-31G*/MPA/FROG2 NO-OPT $R^2=0.912$               |              |       |          |    |          |       |          |    |
| 1                                                          | 0.909        | 0.603 | 0.454    | 48 | 0.936    | 0.694 | 0.572    | 12 |
| 2                                                          | 0.944        | 0.513 | 0.421    | 48 | 0.717    | 0.975 | 0.659    | 12 |
| 3                                                          | 0.915        | 0.631 | 0.487    | 48 | 0.923    | 0.584 | 0.532    | 12 |
| 4                                                          | 0.901        | 0.653 | 0.526    | 48 | 0.965    | 0.466 | 0.372    | 12 |
| 5                                                          | 0.900        | 0.630 | 0.495    | 48 | 0.955    | 0.591 | 0.522    | 12 |
| Bult2002-mpa B3LYP 6-31G*/NPA/RDKIT MM-OPT $R^2=0.912$     |              |       |          |    |          |       |          |    |
| 1                                                          | 0.903        | 0.624 | 0.481    | 48 | 0.946    | 0.629 | 0.465    | 12 |
| 2                                                          | 0.929        | 0.579 | 0.469    | 48 | 0.789    | 0.774 | 0.619    | 12 |
| 3                                                          | 0.913        | 0.637 | 0.502    | 48 | 0.902    | 0.577 | 0.481    | 12 |
| 4                                                          | 0.918        | 0.591 | 0.445    | 48 | 0.876    | 0.752 | 0.565    | 12 |
| 5                                                          | 0.908        | 0.602 | 0.471    | 48 | 0.935    | 0.743 | 0.526    | 12 |
| Bult2002-mpa B3LYP 6-31G*/NPA/OPENBABEL NO-OPT $R^2=0.912$ |              |       |          |    |          |       |          |    |
| 1                                                          | 0.893        | 0.657 | 0.514    | 48 | 0.968    | 0.476 | 0.396    | 12 |
| 2                                                          | 0.940        | 0.534 | 0.428    | 48 | 0.719    | 0.920 | 0.717    | 12 |
| 3                                                          | 0.914        | 0.631 | 0.490    | 48 | 0.894    | 0.561 | 0.439    | 12 |
| 4                                                          | 0.914        | 0.606 | 0.473    | 48 | 0.890    | 0.728 | 0.518    | 12 |
| 5                                                          | 0.905        | 0.614 | 0.484    | 48 | 0.930    | 0.661 | 0.517    | 12 |
| Bult2004-aim B3LYP 6-31G*/AIM/NCI QM-OPT $R^2=0.912$       |              |       |          |    |          |       |          |    |
| 1                                                          | 0.905        | 0.618 | 0.485    | 48 | 0.981    | 0.695 | 0.521    | 12 |
| 2                                                          | 0.935        | 0.554 | 0.457    | 48 | 0.751    | 0.853 | 0.621    | 12 |
| 3                                                          | 0.918        | 0.618 | 0.460    | 48 | 0.882    | 0.660 | 0.544    | 12 |
| 4                                                          | 0.904        | 0.641 | 0.507    | 48 | 0.932    | 0.571 | 0.474    | 12 |
| 5                                                          | 0.905        | 0.613 | 0.465    | 48 | 0.934    | 0.648 | 0.530    | 12 |
| Bult2002-mpa B3LYP 6-31G*/NPA/OPENBABEL MM-OPT $R^2=0.911$ |              |       |          |    |          |       |          |    |
| 1                                                          | 0.892        | 0.659 | 0.513    | 48 | 0.967    | 0.481 | 0.394    | 12 |
| 2                                                          | 0.940        | 0.534 | 0.429    | 48 | 0.711    | 0.931 | 0.725    | 12 |
| 3                                                          | 0.914        | 0.634 | 0.489    | 48 | 0.891    | 0.569 | 0.455    | 12 |
| 4                                                          | 0.914        | 0.609 | 0.472    | 48 | 0.890    | 0.731 | 0.515    | 12 |
| 5                                                          | 0.903        | 0.620 | 0.489    | 48 | 0.932    | 0.649 | 0.508    | 12 |

Table S5: Cross-validation results.

| Fold                                                       | Training set |       |          |    | Test set |       |          |    |
|------------------------------------------------------------|--------------|-------|----------|----|----------|-------|----------|----|
|                                                            | $R^2$        | RMSE  | $\Delta$ | N  | $Q^2$    | RMSE  | $\Delta$ | N  |
| Bult2002-npa B3LYP 6-31G*/NPA/OPENBABEL QM-OPT $R^2=0.911$ |              |       |          |    |          |       |          |    |
| 1                                                          | 0.891        | 0.661 | 0.517    | 48 | 0.969    | 0.478 | 0.400    | 12 |
| 2                                                          | 0.939        | 0.536 | 0.430    | 48 | 0.710    | 0.931 | 0.725    | 12 |
| 3                                                          | 0.914        | 0.634 | 0.483    | 48 | 0.851    | 0.672 | 0.558    | 12 |
| 4                                                          | 0.914        | 0.608 | 0.473    | 48 | 0.888    | 0.739 | 0.529    | 12 |
| 5                                                          | 0.905        | 0.613 | 0.480    | 48 | 0.923    | 0.692 | 0.550    | 12 |
| QM B3LYP 6-31G*/MPA/PUBCHEM MM-OPT $R^2=0.911$             |              |       |          |    |          |       |          |    |
| 1                                                          | 0.909        | 0.604 | 0.434    | 48 | 0.860    | 0.913 | 0.527    | 12 |
| 2                                                          | 0.928        | 0.584 | 0.423    | 48 | 0.766    | 0.834 | 0.498    | 12 |
| 3                                                          | 0.914        | 0.633 | 0.438    | 48 | 0.884    | 0.687 | 0.469    | 12 |
| 4                                                          | 0.916        | 0.599 | 0.430    | 48 | 0.904    | 0.767 | 0.517    | 12 |
| 5                                                          | 0.919        | 0.565 | 0.424    | 48 | 0.906    | 0.972 | 0.740    | 12 |
| QM B3LYP 6-31G*/MPA/RDKIT MM-OPT $R^2=0.909$               |              |       |          |    |          |       |          |    |
| 1                                                          | 0.912        | 0.594 | 0.399    | 48 | 0.916    | 0.750 | 0.515    | 12 |
| 2                                                          | 0.909        | 0.656 | 0.439    | 48 | 0.927    | 0.526 | 0.314    | 12 |
| 3                                                          | 0.922        | 0.601 | 0.420    | 48 | 0.813    | 0.958 | 0.703    | 12 |
| 4                                                          | 0.917        | 0.598 | 0.405    | 48 | 0.883    | 0.746 | 0.514    | 12 |
| 5                                                          | 0.898        | 0.636 | 0.446    | 48 | 0.945    | 0.617 | 0.427    | 12 |
| Svob2007-chal2 HF STO-3G/MPA/RDKIT QM-OPT $R^2=0.909$      |              |       |          |    |          |       |          |    |
| 1                                                          | 0.895        | 0.649 | 0.454    | 48 | 0.944    | 0.563 | 0.396    | 12 |
| 2                                                          | 0.925        | 0.597 | 0.432    | 48 | 0.760    | 0.809 | 0.610    | 12 |
| 3                                                          | 0.915        | 0.629 | 0.438    | 48 | 0.870    | 0.643 | 0.477    | 12 |
| 4                                                          | 0.899        | 0.660 | 0.482    | 48 | 0.940    | 0.525 | 0.365    | 12 |
| 5                                                          | 0.926        | 0.542 | 0.391    | 48 | 0.875    | 1.030 | 0.706    | 12 |
| Chavez2006 B3LYP 6-31G*/MPA/RDKIT MM-OPT $R^2=0.908$       |              |       |          |    |          |       |          |    |
| 1                                                          | 0.895        | 0.651 | 0.480    | 48 | 0.955    | 0.610 | 0.487    | 12 |
| 2                                                          | 0.934        | 0.557 | 0.441    | 48 | 0.730    | 0.892 | 0.724    | 12 |
| 3                                                          | 0.926        | 0.586 | 0.450    | 48 | 0.716    | 1.033 | 0.503    | 12 |
| 4                                                          | 0.910        | 0.621 | 0.487    | 48 | 0.893    | 0.733 | 0.531    | 12 |
| 5                                                          | 0.891        | 0.655 | 0.516    | 48 | 0.949    | 0.547 | 0.415    | 12 |
| Chavez2006 B3LYP 6-31G*/MPA/BALLOON QM-OPT $R^2=0.908$     |              |       |          |    |          |       |          |    |
| 1                                                          | 0.911        | 0.598 | 0.446    | 48 | 0.886    | 0.972 | 0.648    | 12 |
| 2                                                          | 0.933        | 0.563 | 0.445    | 48 | 0.741    | 0.870 | 0.695    | 12 |
| 3                                                          | 0.911        | 0.645 | 0.498    | 48 | 0.876    | 0.609 | 0.486    | 12 |
| 4                                                          | 0.912        | 0.616 | 0.475    | 48 | 0.902    | 0.722 | 0.541    | 12 |
| 5                                                          | 0.890        | 0.660 | 0.528    | 48 | 0.949    | 0.546 | 0.415    | 12 |
| Bult2004-aim B3LYP 6-31G*/AIM/OPENBABEL NO-OPT $R^2=0.908$ |              |       |          |    |          |       |          |    |
| 1                                                          | 0.895        | 0.649 | 0.506    | 48 | 0.945    | 0.632 | 0.488    | 12 |
| 2                                                          | 0.938        | 0.543 | 0.435    | 48 | 0.698    | 0.933 | 0.717    | 12 |
| 3                                                          | 0.908        | 0.656 | 0.520    | 48 | 0.892    | 0.595 | 0.499    | 12 |
| 4                                                          | 0.903        | 0.646 | 0.504    | 48 | 0.922    | 0.605 | 0.514    | 12 |
| 5                                                          | 0.902        | 0.622 | 0.483    | 48 | 0.920    | 0.683 | 0.569    | 12 |
| QM B3LYP 6-31G*/NPA/BALLOON NO-OPT $R^2=0.908$             |              |       |          |    |          |       |          |    |
| 1                                                          | 0.911        | 0.596 | 0.440    | 48 | 0.905    | 0.809 | 0.671    | 12 |
| 2                                                          | 0.912        | 0.643 | 0.483    | 48 | 0.874    | 0.606 | 0.496    | 12 |
| 3                                                          | 0.911        | 0.643 | 0.471    | 48 | 0.918    | 0.612 | 0.482    | 12 |
| 4                                                          | 0.919        | 0.590 | 0.463    | 48 | 0.873    | 0.831 | 0.500    | 12 |
| 5                                                          | 0.899        | 0.633 | 0.498    | 48 | 0.932    | 0.719 | 0.543    | 12 |
| Svob2007-chal2 HF STO-3G/MPA/FROG2 NO-OPT $R^2=0.907$      |              |       |          |    |          |       |          |    |
| 1                                                          | 0.915        | 0.584 | 0.436    | 48 | 0.858    | 1.004 | 0.590    | 12 |
| 2                                                          | 0.941        | 0.527 | 0.411    | 48 | 0.705    | 1.023 | 0.856    | 12 |
| 3                                                          | 0.911        | 0.642 | 0.466    | 48 | 0.868    | 0.648 | 0.543    | 12 |
| 4                                                          | 0.901        | 0.651 | 0.490    | 48 | 0.921    | 0.599 | 0.422    | 12 |
| 5                                                          | 0.885        | 0.674 | 0.504    | 48 | 0.963    | 0.467 | 0.340    | 12 |
| Bult2004-aim B3LYP 6-31G*/AIM/OPENBABEL MM-OPT $R^2=0.907$ |              |       |          |    |          |       |          |    |
| 1                                                          | 0.894        | 0.652 | 0.503    | 48 | 0.943    | 0.639 | 0.489    | 12 |
| 2                                                          | 0.937        | 0.543 | 0.434    | 48 | 0.691    | 0.943 | 0.722    | 12 |
| 3                                                          | 0.907        | 0.660 | 0.516    | 48 | 0.891    | 0.597 | 0.502    | 12 |
| 4                                                          | 0.903        | 0.646 | 0.503    | 48 | 0.918    | 0.625 | 0.534    | 12 |

Table S5: Cross-validation results.

| Fold                                                     | Training set |       |          |    | Test set |       |          |    |
|----------------------------------------------------------|--------------|-------|----------|----|----------|-------|----------|----|
|                                                          | $R^2$        | RMSE  | $\Delta$ | N  | $Q^2$    | RMSE  | $\Delta$ | N  |
| 5                                                        | 0.900        | 0.628 | 0.487    | 48 | 0.923    | 0.673 | 0.546    | 12 |
| Bult2002-npa B3LYP 6-31G*/NPA/BALLOON MM-OPT $R^2=0.907$ |              |       |          |    |          |       |          |    |
| 1                                                        | 0.906        | 0.615 | 0.473    | 48 | 0.909    | 0.854 | 0.552    | 12 |
| 2                                                        | 0.927        | 0.589 | 0.473    | 48 | 0.767    | 0.816 | 0.655    | 12 |
| 3                                                        | 0.908        | 0.655 | 0.509    | 48 | 0.897    | 0.566 | 0.471    | 12 |
| 4                                                        | 0.916        | 0.602 | 0.465    | 48 | 0.881    | 0.802 | 0.608    | 12 |
| 5                                                        | 0.892        | 0.653 | 0.522    | 48 | 0.941    | 0.588 | 0.475    | 12 |
| QM B3LYP 6-31G*/NPA/FROG2 MM-OPT $R^2=0.907$             |              |       |          |    |          |       |          |    |
| 1                                                        | 0.887        | 0.672 | 0.481    | 48 | 0.963    | 0.498 | 0.379    | 12 |
| 2                                                        | 0.940        | 0.534 | 0.424    | 48 | 0.722    | 1.017 | 0.641    | 12 |
| 3                                                        | 0.915        | 0.629 | 0.453    | 48 | 0.839    | 0.720 | 0.516    | 12 |
| 4                                                        | 0.902        | 0.648 | 0.470    | 48 | 0.929    | 0.601 | 0.413    | 12 |
| 5                                                        | 0.896        | 0.642 | 0.459    | 48 | 0.941    | 0.644 | 0.487    | 12 |
| Chavez2006 B3LYP 6-31G*/MPA/RDKit NO-OPT $R^2=0.907$     |              |       |          |    |          |       |          |    |
| 1                                                        | 0.890        | 0.665 | 0.516    | 48 | 0.962    | 0.574 | 0.448    | 12 |
| 2                                                        | 0.934        | 0.556 | 0.447    | 48 | 0.707    | 0.903 | 0.760    | 12 |
| 3                                                        | 0.906        | 0.664 | 0.518    | 48 | 0.906    | 0.541 | 0.441    | 12 |
| 4                                                        | 0.915        | 0.604 | 0.480    | 48 | 0.869    | 0.798 | 0.605    | 12 |
| 5                                                        | 0.896        | 0.642 | 0.514    | 48 | 0.931    | 0.653 | 0.481    | 12 |
| Chavez2006 B3LYP 6-31G*/MPA/FROG2 QM-OPT $R^2=0.907$     |              |       |          |    |          |       |          |    |
| 1                                                        | 0.923        | 0.557 | 0.406    | 48 | 0.771    | 1.193 | 0.689    | 12 |
| 2                                                        | 0.942        | 0.523 | 0.418    | 48 | 0.753    | 1.063 | 0.932    | 12 |
| 3                                                        | 0.908        | 0.656 | 0.519    | 48 | 0.884    | 0.588 | 0.478    | 12 |
| 4                                                        | 0.906        | 0.636 | 0.503    | 48 | 0.902    | 0.711 | 0.544    | 12 |
| 5                                                        | 0.886        | 0.672 | 0.533    | 48 | 0.961    | 0.478 | 0.410    | 12 |
| Chavez2006 B3LYP 6-31G*/MPA/BALLOON MM-OPT $R^2=0.906$   |              |       |          |    |          |       |          |    |
| 1                                                        | 0.909        | 0.603 | 0.442    | 48 | 0.883    | 0.982 | 0.650    | 12 |
| 2                                                        | 0.932        | 0.566 | 0.451    | 48 | 0.731    | 0.885 | 0.716    | 12 |
| 3                                                        | 0.907        | 0.658 | 0.508    | 48 | 0.900    | 0.552 | 0.462    | 12 |
| 4                                                        | 0.910        | 0.622 | 0.482    | 48 | 0.900    | 0.725 | 0.542    | 12 |
| 5                                                        | 0.890        | 0.660 | 0.526    | 48 | 0.945    | 0.564 | 0.432    | 12 |
| Chavez2006 B3LYP 6-31G*/MPA/FROG2 MM-OPT $R^2=0.906$     |              |       |          |    |          |       |          |    |
| 1                                                        | 0.917        | 0.577 | 0.424    | 48 | 0.823    | 1.090 | 0.672    | 12 |
| 2                                                        | 0.942        | 0.523 | 0.421    | 48 | 0.752    | 1.073 | 0.940    | 12 |
| 3                                                        | 0.908        | 0.654 | 0.524    | 48 | 0.878    | 0.605 | 0.489    | 12 |
| 4                                                        | 0.905        | 0.637 | 0.507    | 48 | 0.902    | 0.712 | 0.543    | 12 |
| 5                                                        | 0.885        | 0.675 | 0.537    | 48 | 0.961    | 0.473 | 0.412    | 12 |
| QM B3LYP 6-31G*/NPA/FROG2 NO-OPT $R^2=0.906$             |              |       |          |    |          |       |          |    |
| 1                                                        | 0.911        | 0.598 | 0.440    | 48 | 0.885    | 0.871 | 0.534    | 12 |
| 2                                                        | 0.925        | 0.595 | 0.435    | 48 | 0.763    | 0.807 | 0.664    | 12 |
| 3                                                        | 0.917        | 0.622 | 0.463    | 48 | 0.812    | 0.771 | 0.617    | 12 |
| 4                                                        | 0.893        | 0.677 | 0.513    | 48 | 0.955    | 0.483 | 0.343    | 12 |
| 5                                                        | 0.896        | 0.642 | 0.484    | 48 | 0.945    | 0.723 | 0.600    | 12 |
| Svob2007-chal2 HF STO-3G/MPA/NCI NO-OPT $R^2=0.906$      |              |       |          |    |          |       |          |    |
| 1                                                        | 0.909        | 0.603 | 0.469    | 48 | 0.878    | 0.904 | 0.510    | 12 |
| 2                                                        | 0.929        | 0.581 | 0.441    | 48 | 0.714    | 0.886 | 0.731    | 12 |
| 3                                                        | 0.911        | 0.644 | 0.448    | 48 | 0.836    | 0.697 | 0.566    | 12 |
| 4                                                        | 0.910        | 0.621 | 0.453    | 48 | 0.894    | 0.736 | 0.596    | 12 |
| 5                                                        | 0.882        | 0.683 | 0.530    | 48 | 0.970    | 0.436 | 0.334    | 12 |
| Bult2002-npa B3LYP 6-31G*/NPA/BALLOON QM-OPT $R^2=0.906$ |              |       |          |    |          |       |          |    |
| 1                                                        | 0.907        | 0.610 | 0.467    | 48 | 0.900    | 0.908 | 0.604    | 12 |
| 2                                                        | 0.925        | 0.597 | 0.481    | 48 | 0.771    | 0.811 | 0.643    | 12 |
| 3                                                        | 0.908        | 0.656 | 0.504    | 48 | 0.829    | 0.721 | 0.540    | 12 |
| 4                                                        | 0.915        | 0.605 | 0.463    | 48 | 0.875    | 0.815 | 0.630    | 12 |
| 5                                                        | 0.891        | 0.658 | 0.526    | 48 | 0.938    | 0.604 | 0.472    | 12 |
| Chavez2006 B3LYP 6-31G*/MPA/NCI NO-OPT $R^2=0.906$       |              |       |          |    |          |       |          |    |
| 1                                                        | 0.890        | 0.664 | 0.511    | 48 | 0.947    | 0.638 | 0.429    | 12 |
| 2                                                        | 0.932        | 0.566 | 0.462    | 48 | 0.704    | 0.908 | 0.760    | 12 |
| 3                                                        | 0.913        | 0.636 | 0.481    | 48 | 0.835    | 0.700 | 0.593    | 12 |

Table S5: Cross-validation results.

| Fold                                                       | Training set |       |          |    | Test set |       |          |    |
|------------------------------------------------------------|--------------|-------|----------|----|----------|-------|----------|----|
|                                                            | $R^2$        | RMSE  | $\Delta$ | N  | $Q^2$    | RMSE  | $\Delta$ | N  |
| 4                                                          | 0.910        | 0.620 | 0.493    | 48 | 0.886    | 0.752 | 0.544    | 12 |
| 5                                                          | 0.889        | 0.664 | 0.529    | 48 | 0.949    | 0.548 | 0.437    | 12 |
| Chavez2006 B3LYP 6-31G*/MPA/BALLOON NO-OPT $R^2=0.904$     |              |       |          |    |          |       |          |    |
| 1                                                          | 0.898        | 0.639 | 0.477    | 48 | 0.918    | 0.867 | 0.601    | 12 |
| 2                                                          | 0.931        | 0.572 | 0.462    | 48 | 0.718    | 0.895 | 0.740    | 12 |
| 3                                                          | 0.908        | 0.656 | 0.515    | 48 | 0.875    | 0.637 | 0.495    | 12 |
| 4                                                          | 0.909        | 0.624 | 0.486    | 48 | 0.885    | 0.759 | 0.576    | 12 |
| 5                                                          | 0.889        | 0.663 | 0.534    | 48 | 0.942    | 0.601 | 0.454    | 12 |
| Bult2002-mpa B3LYP 6-31G*/NPA/RDKit NO-OPT $R^2=0.904$     |              |       |          |    |          |       |          |    |
| 1                                                          | 0.888        | 0.669 | 0.515    | 48 | 0.946    | 0.597 | 0.490    | 12 |
| 2                                                          | 0.927        | 0.587 | 0.472    | 48 | 0.730    | 0.860 | 0.715    | 12 |
| 3                                                          | 0.903        | 0.673 | 0.530    | 48 | 0.906    | 0.569 | 0.418    | 12 |
| 4                                                          | 0.917        | 0.595 | 0.470    | 48 | 0.841    | 0.869 | 0.657    | 12 |
| 5                                                          | 0.894        | 0.649 | 0.526    | 48 | 0.932    | 0.659 | 0.518    | 12 |
| Bult2004-aim B3LYP 6-31G*/AIM/OPENBABEL QM-OPT $R^2=0.904$ |              |       |          |    |          |       |          |    |
| 1                                                          | 0.890        | 0.665 | 0.519    | 48 | 0.948    | 0.644 | 0.484    | 12 |
| 2                                                          | 0.935        | 0.553 | 0.447    | 48 | 0.680    | 0.956 | 0.735    | 12 |
| 3                                                          | 0.902        | 0.674 | 0.529    | 48 | 0.907    | 0.555 | 0.452    | 12 |
| 4                                                          | 0.899        | 0.658 | 0.511    | 48 | 0.917    | 0.628 | 0.541    | 12 |
| 5                                                          | 0.898        | 0.636 | 0.488    | 48 | 0.917    | 0.699 | 0.579    | 12 |
| QM B3LYP 6-31G*/AIM/BALLOON NO-OPT $R^2=0.904$             |              |       |          |    |          |       |          |    |
| 1                                                          | 0.900        | 0.633 | 0.436    | 48 | 0.914    | 0.731 | 0.464    | 12 |
| 2                                                          | 0.915        | 0.632 | 0.411    | 48 | 0.834    | 0.749 | 0.554    | 12 |
| 3                                                          | 0.918        | 0.618 | 0.393    | 48 | 0.728    | 1.015 | 0.712    | 12 |
| 4                                                          | 0.905        | 0.639 | 0.431    | 48 | 0.898    | 0.689 | 0.435    | 12 |
| 5                                                          | 0.892        | 0.653 | 0.445    | 48 | 0.925    | 0.660 | 0.347    | 12 |
| Bult2002-mpa B3LYP 6-31G*/NPA/BALLOON NO-OPT $R^2=0.903$   |              |       |          |    |          |       |          |    |
| 1                                                          | 0.894        | 0.653 | 0.504    | 48 | 0.936    | 0.757 | 0.556    | 12 |
| 2                                                          | 0.922        | 0.606 | 0.483    | 48 | 0.757    | 0.825 | 0.676    | 12 |
| 3                                                          | 0.903        | 0.672 | 0.522    | 48 | 0.888    | 0.624 | 0.470    | 12 |
| 4                                                          | 0.915        | 0.604 | 0.469    | 48 | 0.855    | 0.847 | 0.645    | 12 |
| 5                                                          | 0.891        | 0.657 | 0.530    | 48 | 0.932    | 0.667 | 0.485    | 12 |
| QM B3LYP 6-31G*/AIM/NCI QM-OPT $R^2=0.902$                 |              |       |          |    |          |       |          |    |
| 1                                                          | 0.898        | 0.658 | 0.505    | 48 | 0.928    | 0.678 | 0.500    | 12 |
| 2                                                          | 0.928        | 0.544 | 0.411    | 48 | 0.910    | 1.166 | 0.986    | 12 |
| 3                                                          | 0.897        | 0.640 | 0.507    | 48 | 0.897    | 0.746 | 0.578    | 12 |
| 4                                                          | 0.901        | 0.639 | 0.471    | 48 | 0.912    | 0.772 | 0.602    | 12 |
| 5                                                          | 0.897        | 0.692 | 0.552    | 48 | 0.911    | 0.484 | 0.387    | 12 |
| Bult2002-mpa B3LYP 6-31G*/NPA/RDKit MM-OPT $R^2=0.902$     |              |       |          |    |          |       |          |    |
| 1                                                          | 0.889        | 0.669 | 0.503    | 48 | 0.943    | 0.644 | 0.496    | 12 |
| 2                                                          | 0.923        | 0.604 | 0.483    | 48 | 0.746    | 0.850 | 0.697    | 12 |
| 3                                                          | 0.925        | 0.592 | 0.448    | 48 | 0.508    | 1.236 | 0.670    | 12 |
| 4                                                          | 0.908        | 0.628 | 0.484    | 48 | 0.853    | 0.847 | 0.613    | 12 |
| 5                                                          | 0.887        | 0.670 | 0.528    | 48 | 0.940    | 0.608 | 0.475    | 12 |
| Bult2004-aim B3LYP 6-31G*/AIM/PUBCHEM NO-OPT $R^2=0.902$   |              |       |          |    |          |       |          |    |
| 1                                                          | 0.889        | 0.668 | 0.510    | 48 | 0.951    | 0.671 | 0.501    | 12 |
| 2                                                          | 0.930        | 0.574 | 0.472    | 48 | 0.711    | 0.955 | 0.774    | 12 |
| 3                                                          | 0.905        | 0.667 | 0.521    | 48 | 0.865    | 0.630 | 0.512    | 12 |
| 4                                                          | 0.891        | 0.683 | 0.536    | 48 | 0.932    | 0.553 | 0.449    | 12 |
| 5                                                          | 0.904        | 0.618 | 0.479    | 48 | 0.897    | 0.829 | 0.676    | 12 |
| QM B3LYP 6-31G*/NPA/BALLOON QM-OPT $R^2=0.901$             |              |       |          |    |          |       |          |    |
| 1                                                          | 0.919        | 0.570 | 0.394    | 48 | 0.849    | 1.069 | 0.674    | 12 |
| 2                                                          | 0.900        | 0.688 | 0.485    | 48 | 0.875    | 0.588 | 0.539    | 12 |
| 3                                                          | 0.903        | 0.674 | 0.492    | 48 | 0.862    | 0.718 | 0.514    | 12 |
| 4                                                          | 0.888        | 0.692 | 0.499    | 48 | 0.961    | 0.504 | 0.413    | 12 |
| 5                                                          | 0.920        | 0.563 | 0.449    | 48 | 0.880    | 0.975 | 0.706    | 12 |
| QM B3LYP 6-31G*/AIM/PUBCHEM NO-OPT $R^2=0.900$             |              |       |          |    |          |       |          |    |
| 1                                                          | 0.880        | 0.713 | 0.503    | 48 | 0.968    | 0.413 | 0.316    | 12 |
| 2                                                          | 0.941        | 0.493 | 0.312    | 48 | 0.892    | 1.979 | 1.278    | 12 |

Table S5: Cross-validation results.

| Fold                                                                     | Training set |       |          |    | Test set |       |          |    |
|--------------------------------------------------------------------------|--------------|-------|----------|----|----------|-------|----------|----|
|                                                                          | $R^2$        | RMSE  | $\Delta$ | N  | $Q^2$    | RMSE  | $\Delta$ | N  |
| 3                                                                        | 0.910        | 0.596 | 0.418    | 48 | 0.868    | 0.923 | 0.679    | 12 |
| 4                                                                        | 0.883        | 0.692 | 0.489    | 48 | 0.966    | 0.572 | 0.444    | 12 |
| 5                                                                        | 0.907        | 0.655 | 0.500    | 48 | 0.973    | 0.754 | 0.494    | 12 |
| Svob2007-chal2 HF STO-3G/MPA/OPENBABEL MM-OPT $R^2=0.900$                |              |       |          |    |          |       |          |    |
| 1                                                                        | 0.879        | 0.698 | 0.509    | 48 | 0.955    | 0.493 | 0.341    | 12 |
| 2                                                                        | 0.928        | 0.583 | 0.427    | 48 | 0.706    | 0.945 | 0.685    | 12 |
| 3                                                                        | 0.922        | 0.605 | 0.418    | 48 | 0.739    | 0.927 | 0.751    | 12 |
| 4                                                                        | 0.901        | 0.652 | 0.479    | 48 | 0.879    | 0.745 | 0.502    | 12 |
| 5                                                                        | 0.873        | 0.708 | 0.526    | 48 | 0.972    | 0.400 | 0.290    | 12 |
| Svob2007-chal2 HF STO-3G/MPA/OPENBABEL NO-OPT $R^2=0.900$                |              |       |          |    |          |       |          |    |
| 1                                                                        | 0.880        | 0.693 | 0.507    | 48 | 0.949    | 0.527 | 0.350    | 12 |
| 2                                                                        | 0.926        | 0.590 | 0.433    | 48 | 0.723    | 0.930 | 0.672    | 12 |
| 3                                                                        | 0.923        | 0.600 | 0.416    | 48 | 0.733    | 0.953 | 0.768    | 12 |
| 4                                                                        | 0.900        | 0.656 | 0.485    | 48 | 0.885    | 0.725 | 0.480    | 12 |
| 5                                                                        | 0.874        | 0.707 | 0.523    | 48 | 0.971    | 0.413 | 0.305    | 12 |
| Bult2002- <small>npa</small> B3LYP 6-31G*/NPA/NCI NO-OPT $R^2=0.899$     |              |       |          |    |          |       |          |    |
| 1                                                                        | 0.878        | 0.699 | 0.534    | 48 | 0.962    | 0.563 | 0.405    | 12 |
| 2                                                                        | 0.922        | 0.606 | 0.474    | 48 | 0.702    | 0.902 | 0.723    | 12 |
| 3                                                                        | 0.910        | 0.649 | 0.490    | 48 | 0.813    | 0.756 | 0.605    | 12 |
| 4                                                                        | 0.910        | 0.622 | 0.475    | 48 | 0.851    | 0.853 | 0.621    | 12 |
| 5                                                                        | 0.882        | 0.683 | 0.543    | 48 | 0.944    | 0.600 | 0.446    | 12 |
| Svob2007-chal2 HF STO-3G/MPA/RDKIT MM-OPT $R^2=0.899$                    |              |       |          |    |          |       |          |    |
| 1                                                                        | 0.872        | 0.716 | 0.497    | 48 | 0.968    | 0.421 | 0.324    | 12 |
| 2                                                                        | 0.915        | 0.635 | 0.445    | 48 | 0.774    | 0.784 | 0.637    | 12 |
| 3                                                                        | 0.942        | 0.519 | 0.386    | 48 | 0.615    | 1.157 | 0.658    | 12 |
| 4                                                                        | 0.892        | 0.682 | 0.480    | 48 | 0.932    | 0.595 | 0.454    | 12 |
| 5                                                                        | 0.879        | 0.692 | 0.510    | 48 | 0.950    | 0.570 | 0.382    | 12 |
| Bult2004- <small>aim</small> B3LYP 6-31G*/AIM/PUBCHEM QM-OPT $R^2=0.899$ |              |       |          |    |          |       |          |    |
| 1                                                                        | 0.891        | 0.662 | 0.528    | 48 | 0.956    | 0.746 | 0.592    | 12 |
| 2                                                                        | 0.934        | 0.560 | 0.457    | 48 | 0.690    | 0.997 | 0.823    | 12 |
| 3                                                                        | 0.896        | 0.696 | 0.553    | 48 | 0.916    | 0.515 | 0.431    | 12 |
| 4                                                                        | 0.889        | 0.690 | 0.556    | 48 | 0.929    | 0.568 | 0.473    | 12 |
| 5                                                                        | 0.897        | 0.638 | 0.499    | 48 | 0.899    | 0.854 | 0.697    | 12 |
| Bult2004- <small>aim</small> B3LYP 6-31G*/AIM/PUBCHEM MM-OPT $R^2=0.899$ |              |       |          |    |          |       |          |    |
| 1                                                                        | 0.889        | 0.668 | 0.508    | 48 | 0.941    | 0.768 | 0.582    | 12 |
| 2                                                                        | 0.930        | 0.574 | 0.477    | 48 | 0.690    | 0.986 | 0.787    | 12 |
| 3                                                                        | 0.898        | 0.691 | 0.547    | 48 | 0.899    | 0.545 | 0.443    | 12 |
| 4                                                                        | 0.891        | 0.684 | 0.536    | 48 | 0.922    | 0.592 | 0.492    | 12 |
| 5                                                                        | 0.900        | 0.630 | 0.488    | 48 | 0.904    | 0.829 | 0.675    | 12 |
| Svob2007-chal2 HF STO-3G/MPA/PUBCHEM QM-OPT $R^2=0.898$                  |              |       |          |    |          |       |          |    |
| 1                                                                        | 0.872        | 0.717 | 0.537    | 48 | 0.967    | 0.470 | 0.339    | 12 |
| 2                                                                        | 0.920        | 0.615 | 0.431    | 48 | 0.738    | 0.863 | 0.681    | 12 |
| 3                                                                        | 0.910        | 0.648 | 0.474    | 48 | 0.799    | 0.773 | 0.612    | 12 |
| 4                                                                        | 0.887        | 0.695 | 0.512    | 48 | 0.935    | 0.542 | 0.395    | 12 |
| 5                                                                        | 0.910        | 0.598 | 0.430    | 48 | 0.847    | 0.958 | 0.578    | 12 |
| Bult2002- <small>npa</small> B3LYP 6-31G*/NPA/FROG2 NO-OPT $R^2=0.898$   |              |       |          |    |          |       |          |    |
| 1                                                                        | 0.897        | 0.642 | 0.508    | 48 | 0.877    | 0.906 | 0.615    | 12 |
| 2                                                                        | 0.917        | 0.626 | 0.525    | 48 | 0.788    | 0.897 | 0.763    | 12 |
| 3                                                                        | 0.897        | 0.692 | 0.564    | 48 | 0.896    | 0.585 | 0.444    | 12 |
| 4                                                                        | 0.912        | 0.614 | 0.490    | 48 | 0.843    | 0.910 | 0.698    | 12 |
| 5                                                                        | 0.887        | 0.670 | 0.558    | 48 | 0.917    | 0.706 | 0.590    | 12 |
| Chavez2006 B3LYP 6-31G*/MPA/FROG2 NO-OPT $R^2=0.897$                     |              |       |          |    |          |       |          |    |
| 1                                                                        | 0.893        | 0.657 | 0.504    | 48 | 0.873    | 0.964 | 0.705    | 12 |
| 2                                                                        | 0.921        | 0.610 | 0.510    | 48 | 0.761    | 0.940 | 0.763    | 12 |
| 3                                                                        | 0.898        | 0.690 | 0.554    | 48 | 0.881    | 0.607 | 0.503    | 12 |
| 4                                                                        | 0.910        | 0.620 | 0.499    | 48 | 0.855    | 0.897 | 0.713    | 12 |
| 5                                                                        | 0.886        | 0.673 | 0.551    | 48 | 0.918    | 0.721 | 0.578    | 12 |
| Svob2007-chal2 HF STO-3G/MPA/OPENBABEL QM-OPT $R^2=0.896$                |              |       |          |    |          |       |          |    |
| 1                                                                        | 0.878        | 0.700 | 0.522    | 48 | 0.942    | 0.564 | 0.348    | 12 |

Table S5: Cross-validation results.

| Fold                                                    | Training set |       |          |    | Test set |       |          |    |
|---------------------------------------------------------|--------------|-------|----------|----|----------|-------|----------|----|
|                                                         | $R^2$        | RMSE  | $\Delta$ | N  | $Q^2$    | RMSE  | $\Delta$ | N  |
| 2                                                       | 0.925        | 0.597 | 0.425    | 48 | 0.709    | 0.956 | 0.710    | 12 |
| 3                                                       | 0.915        | 0.631 | 0.424    | 48 | 0.755    | 0.870 | 0.720    | 12 |
| 4                                                       | 0.896        | 0.667 | 0.486    | 48 | 0.884    | 0.727 | 0.513    | 12 |
| 5                                                       | 0.869        | 0.719 | 0.530    | 48 | 0.968    | 0.431 | 0.297    | 12 |
| QM HF STO-3G/MPA/BALLOON NO-OPT $R^2=0.896$             |              |       |          |    |          |       |          |    |
| 1                                                       | 0.884        | 0.683 | 0.509    | 48 | 0.929    | 0.659 | 0.494    | 12 |
| 2                                                       | 0.901        | 0.685 | 0.505    | 48 | 0.828    | 0.705 | 0.577    | 12 |
| 3                                                       | 0.948        | 0.492 | 0.356    | 48 | 0.332    | 2.394 | 0.860    | 12 |
| 4                                                       | 0.909        | 0.625 | 0.508    | 48 | 0.832    | 0.866 | 0.609    | 12 |
| 5                                                       | 0.872        | 0.713 | 0.548    | 48 | 0.966    | 0.486 | 0.404    | 12 |
| Svob2007-chal2 HF STO-3G/MPA/PUBCHEM NO-OPT $R^2=0.896$ |              |       |          |    |          |       |          |    |
| 1                                                       | 0.869        | 0.725 | 0.531    | 48 | 0.964    | 0.448 | 0.310    | 12 |
| 2                                                       | 0.916        | 0.632 | 0.443    | 48 | 0.747    | 0.842 | 0.665    | 12 |
| 3                                                       | 0.909        | 0.651 | 0.433    | 48 | 0.782    | 0.810 | 0.611    | 12 |
| 4                                                       | 0.888        | 0.692 | 0.521    | 48 | 0.904    | 0.664 | 0.508    | 12 |
| 5                                                       | 0.903        | 0.620 | 0.454    | 48 | 0.873    | 0.871 | 0.525    | 12 |
| Svob2007-chal2 HF STO-3G/MPA/NCI QM-OPT $R^2=0.896$     |              |       |          |    |          |       |          |    |
| 1                                                       | 0.877        | 0.703 | 0.515    | 48 | 0.946    | 0.597 | 0.394    | 12 |
| 2                                                       | 0.920        | 0.614 | 0.439    | 48 | 0.712    | 0.901 | 0.669    | 12 |
| 3                                                       | 0.918        | 0.619 | 0.397    | 48 | 0.738    | 0.887 | 0.717    | 12 |
| 4                                                       | 0.892        | 0.680 | 0.479    | 48 | 0.904    | 0.674 | 0.529    | 12 |
| 5                                                       | 0.872        | 0.711 | 0.514    | 48 | 0.963    | 0.505 | 0.298    | 12 |
| Bult2004-aim B3LYP 6-31G*/AIM/RDKIT QM-OPT $R^2=0.895$  |              |       |          |    |          |       |          |    |
| 1                                                       | 0.890        | 0.666 | 0.519    | 48 | 0.922    | 0.760 | 0.569    | 12 |
| 2                                                       | 0.918        | 0.623 | 0.511    | 48 | 0.752    | 0.874 | 0.658    | 12 |
| 3                                                       | 0.890        | 0.716 | 0.571    | 48 | 0.929    | 0.486 | 0.428    | 12 |
| 4                                                       | 0.897        | 0.666 | 0.509    | 48 | 0.890    | 0.707 | 0.600    | 12 |
| 5                                                       | 0.892        | 0.653 | 0.505    | 48 | 0.902    | 0.827 | 0.628    | 12 |
| QM B3LYP 6-31G*/MPA/RDKIT NO-OPT $R^2=0.895$            |              |       |          |    |          |       |          |    |
| 1                                                       | 0.906        | 0.615 | 0.461    | 48 | 0.873    | 0.944 | 0.785    | 12 |
| 2                                                       | 0.901        | 0.684 | 0.538    | 48 | 0.848    | 0.645 | 0.542    | 12 |
| 3                                                       | 0.895        | 0.700 | 0.554    | 48 | 0.871    | 0.627 | 0.506    | 12 |
| 4                                                       | 0.885        | 0.703 | 0.550    | 48 | 0.942    | 0.569 | 0.492    | 12 |
| 5                                                       | 0.901        | 0.627 | 0.522    | 48 | 0.893    | 0.874 | 0.590    | 12 |
| Bult2004-aim B3LYP 6-31G*/AIM/RDKIT MM-OPT $R^2=0.895$  |              |       |          |    |          |       |          |    |
| 1                                                       | 0.890        | 0.665 | 0.512    | 48 | 0.920    | 0.770 | 0.567    | 12 |
| 2                                                       | 0.916        | 0.629 | 0.511    | 48 | 0.759    | 0.862 | 0.645    | 12 |
| 3                                                       | 0.891        | 0.714 | 0.565    | 48 | 0.874    | 0.611 | 0.493    | 12 |
| 4                                                       | 0.897        | 0.664 | 0.502    | 48 | 0.883    | 0.725 | 0.618    | 12 |
| 5                                                       | 0.890        | 0.660 | 0.518    | 48 | 0.913    | 0.782 | 0.580    | 12 |
| QM HF STO-3G/MPA/FROG2 NO-OPT $R^2=0.894$               |              |       |          |    |          |       |          |    |
| 1                                                       | 0.883        | 0.686 | 0.520    | 48 | 0.926    | 0.663 | 0.404    | 12 |
| 2                                                       | 0.916        | 0.632 | 0.458    | 48 | 0.746    | 0.842 | 0.640    | 12 |
| 3                                                       | 0.913        | 0.638 | 0.452    | 48 | 0.762    | 0.848 | 0.697    | 12 |
| 4                                                       | 0.874        | 0.734 | 0.540    | 48 | 0.977    | 0.373 | 0.297    | 12 |
| 5                                                       | 0.890        | 0.661 | 0.471    | 48 | 0.924    | 0.817 | 0.589    | 12 |
| Svob2007-chal2 HF STO-3G/MPA/RDKIT NO-OPT $R^2=0.894$   |              |       |          |    |          |       |          |    |
| 1                                                       | 0.865        | 0.737 | 0.554    | 48 | 0.976    | 0.403 | 0.301    | 12 |
| 2                                                       | 0.917        | 0.627 | 0.468    | 48 | 0.751    | 0.879 | 0.714    | 12 |
| 3                                                       | 0.906        | 0.661 | 0.484    | 48 | 0.777    | 0.815 | 0.636    | 12 |
| 4                                                       | 0.892        | 0.679 | 0.508    | 48 | 0.899    | 0.692 | 0.494    | 12 |
| 5                                                       | 0.898        | 0.637 | 0.485    | 48 | 0.880    | 0.879 | 0.550    | 12 |
| Bult2004-aim B3LYP 6-31G*/AIM/RDKIT MM-OPT $R^2=0.892$  |              |       |          |    |          |       |          |    |
| 1                                                       | 0.883        | 0.685 | 0.515    | 48 | 0.927    | 0.739 | 0.571    | 12 |
| 2                                                       | 0.916        | 0.629 | 0.503    | 48 | 0.738    | 0.903 | 0.696    | 12 |
| 3                                                       | 0.908        | 0.655 | 0.503    | 48 | 0.688    | 1.106 | 0.588    | 12 |
| 4                                                       | 0.891        | 0.685 | 0.518    | 48 | 0.895    | 0.713 | 0.613    | 12 |
| 5                                                       | 0.880        | 0.689 | 0.545    | 48 | 0.920    | 0.690 | 0.491    | 12 |
| QM B3LYP 6-31G*/AIM/BALLOON MM-OPT $R^2=0.891$          |              |       |          |    |          |       |          |    |

Table S5: Cross-validation results.

| Fold                                                     | Training set |       |          |    | Test set |       |          |    |
|----------------------------------------------------------|--------------|-------|----------|----|----------|-------|----------|----|
|                                                          | $R^2$        | RMSE  | $\Delta$ | N  | $Q^2$    | RMSE  | $\Delta$ | N  |
| 1                                                        | 0.922        | 0.559 | 0.416    | 48 | 0.799    | 1.108 | 0.577    | 12 |
| 2                                                        | 0.907        | 0.664 | 0.491    | 48 | 0.724    | 0.978 | 0.585    | 12 |
| 3                                                        | 0.909        | 0.652 | 0.464    | 48 | 0.720    | 1.276 | 0.838    | 12 |
| 4                                                        | 0.880        | 0.716 | 0.486    | 48 | 0.960    | 0.619 | 0.450    | 12 |
| 5                                                        | 0.882        | 0.683 | 0.490    | 48 | 0.968    | 0.852 | 0.623    | 12 |
| QM HF STO-3G/MPA/NCI QM-OPT $R^2=0.891$                  |              |       |          |    |          |       |          |    |
| 1                                                        | 0.889        | 0.667 | 0.520    | 48 | 0.907    | 0.798 | 0.690    | 12 |
| 2                                                        | 0.897        | 0.698 | 0.556    | 48 | 0.865    | 0.697 | 0.591    | 12 |
| 3                                                        | 0.919        | 0.613 | 0.510    | 48 | 0.700    | 0.969 | 0.784    | 12 |
| 4                                                        | 0.880        | 0.718 | 0.579    | 48 | 0.935    | 0.557 | 0.514    | 12 |
| 5                                                        | 0.878        | 0.694 | 0.581    | 48 | 0.953    | 0.697 | 0.542    | 12 |
| Svob2007-chal2 HF STO-3G/MPA/NCI MM-OPT $R^2=0.891$      |              |       |          |    |          |       |          |    |
| 1                                                        | 0.870        | 0.723 | 0.518    | 48 | 0.949    | 0.621 | 0.427    | 12 |
| 2                                                        | 0.922        | 0.608 | 0.438    | 48 | 0.650    | 0.979 | 0.754    | 12 |
| 3                                                        | 0.913        | 0.635 | 0.391    | 48 | 0.731    | 0.909 | 0.717    | 12 |
| 4                                                        | 0.887        | 0.698 | 0.495    | 48 | 0.897    | 0.695 | 0.479    | 12 |
| 5                                                        | 0.864        | 0.733 | 0.530    | 48 | 0.964    | 0.492 | 0.287    | 12 |
| QM B3LYP 6-31G*/AIM/FROG2 NO-OPT $R^2=0.891$             |              |       |          |    |          |       |          |    |
| 1                                                        | 0.864        | 0.760 | 0.518    | 48 | 0.978    | 0.641 | 0.489    | 12 |
| 2                                                        | 0.862        | 0.753 | 0.536    | 48 | 0.960    | 0.718 | 0.535    | 12 |
| 3                                                        | 0.880        | 0.689 | 0.495    | 48 | 0.829    | 0.971 | 0.729    | 12 |
| 4                                                        | 0.899        | 0.644 | 0.453    | 48 | 0.796    | 1.086 | 0.680    | 12 |
| 5                                                        | 0.893        | 0.704 | 0.499    | 48 | 0.852    | 0.879 | 0.597    | 12 |
| Bult2004-aim B3LYP 6-31G*/AIM/BALLOON QM-OPT $R^2=0.890$ |              |       |          |    |          |       |          |    |
| 1                                                        | 0.898        | 0.640 | 0.503    | 48 | 0.791    | 1.205 | 0.763    | 12 |
| 2                                                        | 0.919        | 0.620 | 0.508    | 48 | 0.711    | 0.941 | 0.739    | 12 |
| 3                                                        | 0.886        | 0.729 | 0.588    | 48 | 0.901    | 0.588 | 0.495    | 12 |
| 4                                                        | 0.894        | 0.674 | 0.523    | 48 | 0.868    | 0.793 | 0.680    | 12 |
| 5                                                        | 0.876        | 0.701 | 0.566    | 48 | 0.921    | 0.676 | 0.509    | 12 |
| Bult2004-aim B3LYP 6-31G*/AIM/NCI NO-OPT $R^2=0.890$     |              |       |          |    |          |       |          |    |
| 1                                                        | 0.881        | 0.691 | 0.534    | 48 | 0.893    | 0.840 | 0.539    | 12 |
| 2                                                        | 0.916        | 0.631 | 0.515    | 48 | 0.692    | 0.934 | 0.725    | 12 |
| 3                                                        | 0.901        | 0.678 | 0.542    | 48 | 0.752    | 0.870 | 0.722    | 12 |
| 4                                                        | 0.894        | 0.674 | 0.521    | 48 | 0.866    | 0.794 | 0.683    | 12 |
| 5                                                        | 0.873        | 0.710 | 0.568    | 48 | 0.937    | 0.622 | 0.475    | 12 |
| Bult2004-aim B3LYP 6-31G*/AIM/BALLOON NO-OPT $R^2=0.888$ |              |       |          |    |          |       |          |    |
| 1                                                        | 0.886        | 0.677 | 0.528    | 48 | 0.867    | 1.016 | 0.674    | 12 |
| 2                                                        | 0.917        | 0.627 | 0.513    | 48 | 0.699    | 0.945 | 0.755    | 12 |
| 3                                                        | 0.884        | 0.736 | 0.591    | 48 | 0.918    | 0.521 | 0.430    | 12 |
| 4                                                        | 0.894        | 0.676 | 0.522    | 48 | 0.868    | 0.784 | 0.687    | 12 |
| 5                                                        | 0.878        | 0.696 | 0.561    | 48 | 0.917    | 0.728 | 0.562    | 12 |
| Svob2007-chal2 HF STO-3G/MPA/PUBCHEM MM-OPT $R^2=0.887$  |              |       |          |    |          |       |          |    |
| 1                                                        | 0.871        | 0.719 | 0.520    | 48 | 0.889    | 0.819 | 0.426    | 12 |
| 2                                                        | 0.914        | 0.636 | 0.475    | 48 | 0.692    | 0.938 | 0.751    | 12 |
| 3                                                        | 0.897        | 0.694 | 0.510    | 48 | 0.797    | 0.782 | 0.546    | 12 |
| 4                                                        | 0.879        | 0.720 | 0.539    | 48 | 0.918    | 0.643 | 0.577    | 12 |
| 5                                                        | 0.888        | 0.667 | 0.495    | 48 | 0.881    | 0.833 | 0.558    | 12 |
| QM B3LYP 6-31G*/AIM/PUBCHEM QM-OPT $R^2=0.886$           |              |       |          |    |          |       |          |    |
| 1                                                        | 0.861        | 0.768 | 0.515    | 48 | 0.971    | 0.463 | 0.366    | 12 |
| 2                                                        | 0.930        | 0.537 | 0.341    | 48 | 0.918    | 1.919 | 1.343    | 12 |
| 3                                                        | 0.903        | 0.622 | 0.428    | 48 | 0.800    | 1.085 | 0.719    | 12 |
| 4                                                        | 0.862        | 0.754 | 0.514    | 48 | 0.939    | 0.632 | 0.473    | 12 |
| 5                                                        | 0.887        | 0.725 | 0.512    | 48 | 0.956    | 0.691 | 0.395    | 12 |
| Bult2004-aim B3LYP 6-31G*/AIM/RDKIT NO-OPT $R^2=0.885$   |              |       |          |    |          |       |          |    |
| 1                                                        | 0.874        | 0.710 | 0.557    | 48 | 0.930    | 0.753 | 0.554    | 12 |
| 2                                                        | 0.912        | 0.643 | 0.515    | 48 | 0.701    | 0.940 | 0.741    | 12 |
| 3                                                        | 0.882        | 0.742 | 0.583    | 48 | 0.841    | 0.694 | 0.545    | 12 |
| 4                                                        | 0.893        | 0.679 | 0.511    | 48 | 0.847    | 0.844 | 0.715    | 12 |
| 5                                                        | 0.876        | 0.699 | 0.558    | 48 | 0.909    | 0.754 | 0.559    | 12 |



Table S5: Cross-validation results.

| Fold                                                     | Training set |       |          |    | Test set |       |          |    |
|----------------------------------------------------------|--------------|-------|----------|----|----------|-------|----------|----|
|                                                          | $R^2$        | RMSE  | $\Delta$ | N  | $Q^2$    | RMSE  | $\Delta$ | N  |
| Bult2004-aim B3LYP 6-31G*/AIM/BALLOON MM-OPT $R^2=0.885$ |              |       |          |    |          |       |          |    |
| 1                                                        | 0.897        | 0.643 | 0.495    | 48 | 0.781    | 1.198 | 0.733    | 12 |
| 2                                                        | 0.914        | 0.638 | 0.503    | 48 | 0.700    | 0.957 | 0.747    | 12 |
| 3                                                        | 0.880        | 0.748 | 0.584    | 48 | 0.915    | 0.515 | 0.409    | 12 |
| 4                                                        | 0.888        | 0.693 | 0.524    | 48 | 0.872    | 0.777 | 0.671    | 12 |
| 5                                                        | 0.871        | 0.713 | 0.559    | 48 | 0.918    | 0.704 | 0.507    | 12 |
| QM B3LYP 6-31G*/AIM/RDKit NO-OPT $R^2=0.882$             |              |       |          |    |          |       |          |    |
| 1                                                        | 0.861        | 0.769 | 0.608    | 48 | 0.896    | 0.694 | 0.590    | 12 |
| 2                                                        | 0.889        | 0.675 | 0.531    | 48 | 0.792    | 1.046 | 0.842    | 12 |
| 3                                                        | 0.867        | 0.726 | 0.585    | 48 | 0.842    | 0.922 | 0.715    | 12 |
| 4                                                        | 0.869        | 0.734 | 0.583    | 48 | 0.908    | 0.847 | 0.633    | 12 |
| 5                                                        | 0.888        | 0.720 | 0.577    | 48 | 0.767    | 1.019 | 0.731    | 12 |
| QM B3LYP 6-31G*/MPA/BALLOON MM-OPT $R^2=0.881$           |              |       |          |    |          |       |          |    |
| 1                                                        | 0.948        | 0.455 | 0.364    | 48 | 0.643    | 1.538 | 0.934    | 12 |
| 2                                                        | 0.875        | 0.767 | 0.509    | 48 | 0.904    | 0.521 | 0.383    | 12 |
| 3                                                        | 0.881        | 0.744 | 0.507    | 48 | 0.907    | 0.652 | 0.382    | 12 |
| 4                                                        | 0.868        | 0.753 | 0.490    | 48 | 0.971    | 0.647 | 0.482    | 12 |
| 5                                                        | 0.870        | 0.717 | 0.448    | 48 | 0.972    | 0.863 | 0.562    | 12 |
| Svob2007-chal2 HF STO-3G/MPA/BALLOON NO-OPT $R^2=0.873$  |              |       |          |    |          |       |          |    |
| 1                                                        | 0.857        | 0.756 | 0.562    | 48 | 0.899    | 0.768 | 0.527    | 12 |
| 2                                                        | 0.894        | 0.707 | 0.525    | 48 | 0.707    | 0.904 | 0.722    | 12 |
| 3                                                        | 0.886        | 0.728 | 0.515    | 48 | 0.750    | 0.862 | 0.646    | 12 |
| 4                                                        | 0.874        | 0.735 | 0.568    | 48 | 0.883    | 0.846 | 0.627    | 12 |
| 5                                                        | 0.871        | 0.715 | 0.564    | 48 | 0.862    | 0.892 | 0.659    | 12 |
| QM B3LYP 6-31G*/MPA/BALLOON QM-OPT $R^2=0.871$           |              |       |          |    |          |       |          |    |
| 1                                                        | 0.910        | 0.602 | 0.403    | 48 | 0.785    | 1.179 | 0.686    | 12 |
| 2                                                        | 0.868        | 0.789 | 0.520    | 48 | 0.875    | 0.611 | 0.447    | 12 |
| 3                                                        | 0.870        | 0.779 | 0.525    | 48 | 0.889    | 0.644 | 0.420    | 12 |
| 4                                                        | 0.861        | 0.773 | 0.503    | 48 | 0.949    | 0.716 | 0.559    | 12 |
| 5                                                        | 0.872        | 0.711 | 0.474    | 48 | 0.913    | 0.920 | 0.652    | 12 |
| Svob2007-chal2 HF STO-3G/MPA/BALLOON QM-OPT $R^2=0.869$  |              |       |          |    |          |       |          |    |
| 1                                                        | 0.868        | 0.728 | 0.505    | 48 | 0.846    | 0.952 | 0.609    | 12 |
| 2                                                        | 0.885        | 0.736 | 0.538    | 48 | 0.687    | 0.930 | 0.716    | 12 |
| 3                                                        | 0.875        | 0.764 | 0.551    | 48 | 0.827    | 0.721 | 0.577    | 12 |
| 4                                                        | 0.875        | 0.731 | 0.551    | 48 | 0.893    | 0.927 | 0.754    | 12 |
| 5                                                        | 0.866        | 0.728 | 0.561    | 48 | 0.881    | 0.897 | 0.572    | 12 |
| Bult2004-aim B3LYP 6-31G*/AIM/FROG2 QM-OPT $R^2=0.869$   |              |       |          |    |          |       |          |    |
| 1                                                        | 0.906        | 0.615 | 0.419    | 48 | 0.550    | 1.603 | 0.963    | 12 |
| 2                                                        | 0.904        | 0.674 | 0.547    | 48 | 0.710    | 1.147 | 0.992    | 12 |
| 3                                                        | 0.874        | 0.766 | 0.598    | 48 | 0.813    | 0.767 | 0.635    | 12 |
| 4                                                        | 0.871        | 0.743 | 0.598    | 48 | 0.847    | 0.873 | 0.639    | 12 |
| 5                                                        | 0.835        | 0.807 | 0.633    | 48 | 0.953    | 0.523 | 0.436    | 12 |
| Bult2004-aim B3LYP 6-31G*/AIM/FROG2 MM-OPT $R^2=0.868$   |              |       |          |    |          |       |          |    |
| 1                                                        | 0.904        | 0.622 | 0.433    | 48 | 0.612    | 1.504 | 0.898    | 12 |
| 2                                                        | 0.903        | 0.676 | 0.548    | 48 | 0.711    | 1.159 | 1.002    | 12 |
| 3                                                        | 0.872        | 0.773 | 0.599    | 48 | 0.825    | 0.738 | 0.618    | 12 |
| 4                                                        | 0.870        | 0.746 | 0.598    | 48 | 0.846    | 0.877 | 0.636    | 12 |
| 5                                                        | 0.837        | 0.803 | 0.628    | 48 | 0.934    | 0.627 | 0.524    | 12 |
| QM B3LYP 6-31G*/AIM/PUBCHEM MM-OPT $R^2=0.864$           |              |       |          |    |          |       |          |    |
| 1                                                        | 0.831        | 0.846 | 0.576    | 48 | 0.985    | 0.479 | 0.344    | 12 |
| 2                                                        | 0.936        | 0.513 | 0.359    | 48 | 0.808    | 2.845 | 1.620    | 12 |
| 3                                                        | 0.930        | 0.527 | 0.388    | 48 | 0.585    | 1.678 | 0.960    | 12 |
| 4                                                        | 0.841        | 0.807 | 0.538    | 48 | 0.897    | 0.751 | 0.571    | 12 |
| 5                                                        | 0.851        | 0.830 | 0.588    | 48 | 0.894    | 0.540 | 0.362    | 12 |
| QM B3LYP 6-31G*/NPA/NCI QM-OPT $R^2=0.861$               |              |       |          |    |          |       |          |    |
| 1                                                        | 0.862        | 0.744 | 0.621    | 48 | 0.815    | 1.224 | 0.975    | 12 |
| 2                                                        | 0.883        | 0.744 | 0.615    | 48 | 0.623    | 1.028 | 0.859    | 12 |
| 3                                                        | 0.882        | 0.742 | 0.625    | 48 | 0.680    | 0.998 | 0.792    | 12 |
| 4                                                        | 0.844        | 0.819 | 0.696    | 48 | 0.922    | 0.589 | 0.519    | 12 |

Table S5: Cross-validation results.

| Fold                                                    | Training set |       |          |    | Test set |       |          |    |
|---------------------------------------------------------|--------------|-------|----------|----|----------|-------|----------|----|
|                                                         | $R^2$        | RMSE  | $\Delta$ | N  | $Q^2$    | RMSE  | $\Delta$ | N  |
| 5                                                       | 0.861        | 0.743 | 0.627    | 48 | 0.876    | 0.954 | 0.765    | 12 |
| Bult2004-aim B3LYP 6-31G*/AIM/FROG2 NO-OPT $R^2=0.858$  |              |       |          |    |          |       |          |    |
| 1                                                       | 0.874        | 0.712 | 0.551    | 48 | 0.758    | 1.234 | 0.873    | 12 |
| 2                                                       | 0.870        | 0.784 | 0.623    | 48 | 0.785    | 0.805 | 0.666    | 12 |
| 3                                                       | 0.868        | 0.785 | 0.615    | 48 | 0.812    | 0.833 | 0.708    | 12 |
| 4                                                       | 0.872        | 0.742 | 0.599    | 48 | 0.795    | 1.023 | 0.771    | 12 |
| 5                                                       | 0.831        | 0.818 | 0.672    | 48 | 0.932    | 0.698 | 0.527    | 12 |
| QM B3LYP 6-31G*/AIM/BALLOON QM-OPT $R^2=0.856$          |              |       |          |    |          |       |          |    |
| 1                                                       | 0.837        | 0.831 | 0.594    | 48 | 0.972    | 0.453 | 0.370    | 12 |
| 2                                                       | 0.880        | 0.702 | 0.460    | 48 | 0.927    | 1.167 | 0.908    | 12 |
| 3                                                       | 0.895        | 0.646 | 0.481    | 48 | 0.721    | 1.297 | 0.837    | 12 |
| 4                                                       | 0.871        | 0.728 | 0.535    | 48 | 0.718    | 1.165 | 0.816    | 12 |
| 5                                                       | 0.883        | 0.736 | 0.568    | 48 | 0.591    | 1.066 | 0.638    | 12 |
| Svob2007-chal2 HF STO-3G/MPA/BALLOON MM-OPT $R^2=0.852$ |              |       |          |    |          |       |          |    |
| 1                                                       | 0.861        | 0.747 | 0.502    | 48 | 0.808    | 1.059 | 0.701    | 12 |
| 2                                                       | 0.876        | 0.766 | 0.546    | 48 | 0.634    | 1.003 | 0.684    | 12 |
| 3                                                       | 0.858        | 0.814 | 0.554    | 48 | 0.809    | 0.752 | 0.561    | 12 |
| 4                                                       | 0.845        | 0.815 | 0.585    | 48 | 0.897    | 0.791 | 0.659    | 12 |
| 5                                                       | 0.841        | 0.794 | 0.584    | 48 | 0.888    | 0.887 | 0.568    | 12 |
| QM B3LYP 6-31G*/NPA/RDKit NO-OPT $R^2=0.796$            |              |       |          |    |          |       |          |    |
| 1                                                       | 0.813        | 0.866 | 0.724    | 48 | 0.772    | 1.217 | 1.001    | 12 |
| 2                                                       | 0.812        | 0.944 | 0.773    | 48 | 0.705    | 0.989 | 0.781    | 12 |
| 3                                                       | 0.815        | 0.928 | 0.740    | 48 | 0.626    | 1.255 | 0.874    | 12 |
| 4                                                       | 0.766        | 1.002 | 0.835    | 48 | 0.926    | 0.666 | 0.489    | 12 |
| 5                                                       | 0.799        | 0.891 | 0.741    | 48 | 0.780    | 1.149 | 0.908    | 12 |
| QM HF STO-3G/MPA/RDKit NO-OPT $R^2=0.782$               |              |       |          |    |          |       |          |    |
| 1                                                       | 0.798        | 0.900 | 0.719    | 48 | 0.733    | 1.260 | 1.148    | 12 |
| 2                                                       | 0.822        | 0.918 | 0.760    | 48 | 0.498    | 1.295 | 0.997    | 12 |
| 3                                                       | 0.809        | 0.943 | 0.754    | 48 | 0.391    | 1.975 | 1.162    | 12 |
| 4                                                       | 0.760        | 1.016 | 0.868    | 48 | 0.872    | 0.797 | 0.553    | 12 |
| 5                                                       | 0.766        | 0.961 | 0.779    | 48 | 0.810    | 1.067 | 0.896    | 12 |

Table S5: Cross-validation results.

| Fold                                                       | Training set |       |          |    | Test set |       |          |    |
|------------------------------------------------------------|--------------|-------|----------|----|----------|-------|----------|----|
|                                                            | $R^2$        | RMSE  | $\Delta$ | N  | $Q^2$    | RMSE  | $\Delta$ | N  |
| <b>Carboxylic acids</b>                                    |              |       |          |    |          |       |          |    |
| Bult2002-npa B3LYP 6-31G*/NPA/BALLOON MM-OPT $R^2=0.853$   |              |       |          |    |          |       |          |    |
| 1                                                          | 0.871        | 0.315 | 0.263    | 65 | 0.909    | 0.290 | 0.232    | 17 |
| 2                                                          | 0.878        | 0.286 | 0.233    | 65 | 0.899    | 0.410 | 0.293    | 17 |
| 3                                                          | 0.894        | 0.302 | 0.244    | 66 | 0.806    | 0.340 | 0.282    | 16 |
| 4                                                          | 0.901        | 0.292 | 0.229    | 66 | 0.765    | 0.377 | 0.324    | 16 |
| 5                                                          | 0.879        | 0.319 | 0.258    | 66 | 0.901    | 0.256 | 0.212    | 16 |
| Bult2002-npa B3LYP 6-31G*/NPA/BALLOON NO-OPT $R^2=0.862$   |              |       |          |    |          |       |          |    |
| 1                                                          | 0.873        | 0.313 | 0.256    | 65 | 0.925    | 0.263 | 0.216    | 17 |
| 2                                                          | 0.887        | 0.276 | 0.225    | 65 | 0.897    | 0.449 | 0.339    | 17 |
| 3                                                          | 0.900        | 0.293 | 0.239    | 66 | 0.788    | 0.349 | 0.291    | 16 |
| 4                                                          | 0.908        | 0.282 | 0.222    | 66 | 0.762    | 0.389 | 0.334    | 16 |
| 5                                                          | 0.878        | 0.321 | 0.261    | 66 | 0.946    | 0.208 | 0.167    | 16 |
| Bult2002-npa B3LYP 6-31G*/NPA/BALLOON QM-OPT $R^2=0.862$   |              |       |          |    |          |       |          |    |
| 1                                                          | 0.877        | 0.308 | 0.253    | 65 | 0.915    | 0.281 | 0.232    | 17 |
| 2                                                          | 0.885        | 0.277 | 0.228    | 65 | 0.878    | 0.462 | 0.340    | 17 |
| 3                                                          | 0.903        | 0.289 | 0.232    | 66 | 0.780    | 0.362 | 0.304    | 16 |
| 4                                                          | 0.907        | 0.284 | 0.228    | 66 | 0.772    | 0.372 | 0.327    | 16 |
| 5                                                          | 0.885        | 0.311 | 0.254    | 66 | 0.903    | 0.251 | 0.197    | 16 |
| Bult2002-npa B3LYP 6-31G*/NPA/FROG2 MM-OPT $R^2=0.881$     |              |       |          |    |          |       |          |    |
| 1                                                          | 0.828        | 0.365 | 0.262    | 65 | 0.966    | 0.197 | 0.157    | 17 |
| 2                                                          | 0.910        | 0.245 | 0.188    | 65 | 0.753    | 0.609 | 0.392    | 17 |
| 3                                                          | 0.873        | 0.330 | 0.225    | 66 | 0.750    | 0.406 | 0.347    | 16 |
| 4                                                          | 0.863        | 0.344 | 0.239    | 66 | 0.844    | 0.340 | 0.271    | 16 |
| 5                                                          | 0.864        | 0.339 | 0.243    | 66 | 0.705    | 0.462 | 0.313    | 16 |
| Bult2002-npa B3LYP 6-31G*/NPA/FROG2 NO-OPT $R^2=0.805$     |              |       |          |    |          |       |          |    |
| 1                                                          | 0.796        | 0.397 | 0.295    | 65 | 0.938    | 0.249 | 0.186    | 17 |
| 2                                                          | 0.848        | 0.320 | 0.234    | 65 | 0.797    | 0.590 | 0.404    | 17 |
| 3                                                          | 0.841        | 0.370 | 0.265    | 66 | 0.802    | 0.396 | 0.338    | 16 |
| 4                                                          | 0.863        | 0.344 | 0.240    | 66 | 0.500    | 0.690 | 0.461    | 16 |
| 5                                                          | 0.852        | 0.354 | 0.273    | 66 | 0.713    | 0.463 | 0.290    | 16 |
| Bult2002-npa B3LYP 6-31G*/NPA/FROG2 QM-OPT $R^2=0.891$     |              |       |          |    |          |       |          |    |
| 1                                                          | 0.835        | 0.357 | 0.247    | 65 | 0.969    | 0.200 | 0.156    | 17 |
| 2                                                          | 0.920        | 0.232 | 0.174    | 65 | 0.761    | 0.610 | 0.392    | 17 |
| 3                                                          | 0.870        | 0.334 | 0.228    | 66 | 0.841    | 0.323 | 0.259    | 16 |
| 4                                                          | 0.875        | 0.328 | 0.218    | 66 | 0.569    | 0.612 | 0.365    | 16 |
| 5                                                          | 0.879        | 0.320 | 0.221    | 66 | 0.558    | 0.580 | 0.295    | 16 |
| Bult2002-npa B3LYP 6-31G*/NPA/NCI MM-OPT $R^2=0.863$       |              |       |          |    |          |       |          |    |
| 1                                                          | 0.868        | 0.320 | 0.243    | 65 | 0.955    | 0.220 | 0.161    | 17 |
| 2                                                          | 0.892        | 0.269 | 0.195    | 65 | 0.868    | 0.436 | 0.317    | 17 |
| 3                                                          | 0.896        | 0.298 | 0.215    | 66 | 0.856    | 0.347 | 0.305    | 16 |
| 4                                                          | 0.915        | 0.272 | 0.207    | 66 | 0.749    | 0.415 | 0.323    | 16 |
| 5                                                          | 0.877        | 0.322 | 0.245    | 66 | 0.947    | 0.194 | 0.156    | 16 |
| Bult2002-npa B3LYP 6-31G*/NPA/NCI NO-OPT $R^2=0.862$       |              |       |          |    |          |       |          |    |
| 1                                                          | 0.873        | 0.313 | 0.247    | 65 | 0.951    | 0.238 | 0.197    | 17 |
| 2                                                          | 0.888        | 0.274 | 0.205    | 65 | 0.897    | 0.409 | 0.289    | 17 |
| 3                                                          | 0.896        | 0.299 | 0.234    | 66 | 0.871    | 0.310 | 0.264    | 16 |
| 4                                                          | 0.920        | 0.263 | 0.204    | 66 | 0.700    | 0.428 | 0.369    | 16 |
| 5                                                          | 0.884        | 0.312 | 0.250    | 66 | 0.933    | 0.240 | 0.205    | 16 |
| Bult2002-npa B3LYP 6-31G*/NPA/NCI QM-OPT $R^2=0.868$       |              |       |          |    |          |       |          |    |
| 1                                                          | 0.865        | 0.323 | 0.259    | 65 | 0.950    | 0.238 | 0.184    | 17 |
| 2                                                          | 0.893        | 0.267 | 0.201    | 65 | 0.835    | 0.508 | 0.360    | 17 |
| 3                                                          | 0.892        | 0.304 | 0.225    | 66 | 0.877    | 0.353 | 0.318    | 16 |
| 4                                                          | 0.901        | 0.293 | 0.224    | 66 | 0.801    | 0.369 | 0.298    | 16 |
| 5                                                          | 0.883        | 0.314 | 0.237    | 66 | 0.752    | 0.419 | 0.301    | 16 |
| Bult2002-npa B3LYP 6-31G*/NPA/OPENBABEL MM-OPT $R^2=0.816$ |              |       |          |    |          |       |          |    |
| 1                                                          | 0.820        | 0.373 | 0.288    | 65 | 0.935    | 0.249 | 0.195    | 17 |
| 2                                                          | 0.849        | 0.318 | 0.238    | 65 | 0.857    | 0.649 | 0.411    | 17 |
| 3                                                          | 0.863        | 0.344 | 0.254    | 66 | 0.799    | 0.409 | 0.322    | 16 |

Table S5: Cross-validation results.

| Fold                                                               | Training set |       |          |    | Test set |       |          |    |
|--------------------------------------------------------------------|--------------|-------|----------|----|----------|-------|----------|----|
|                                                                    | $R^2$        | RMSE  | $\Delta$ | N  | $Q^2$    | RMSE  | $\Delta$ | N  |
| 4                                                                  | 0.869        | 0.337 | 0.255    | 66 | 0.713    | 0.423 | 0.341    | 16 |
| 5                                                                  | 0.866        | 0.336 | 0.256    | 66 | 0.700    | 0.460 | 0.353    | 16 |
| Bult2002- <i>npa</i> B3LYP 6-31G*/NPA/OPENBABEL NO-OPT $R^2=0.813$ |              |       |          |    |          |       |          |    |
| 1                                                                  | 0.818        | 0.374 | 0.290    | 65 | 0.940    | 0.245 | 0.189    | 17 |
| 2                                                                  | 0.847        | 0.320 | 0.237    | 65 | 0.875    | 0.571 | 0.368    | 17 |
| 3                                                                  | 0.861        | 0.346 | 0.256    | 66 | 0.805    | 0.403 | 0.322    | 16 |
| 4                                                                  | 0.868        | 0.337 | 0.254    | 66 | 0.714    | 0.422 | 0.336    | 16 |
| 5                                                                  | 0.865        | 0.338 | 0.255    | 66 | 0.724    | 0.441 | 0.342    | 16 |
| Bult2002- <i>npa</i> B3LYP 6-31G*/NPA/OPENBABEL QM-OPT $R^2=0.833$ |              |       |          |    |          |       |          |    |
| 1                                                                  | 0.828        | 0.364 | 0.277    | 65 | 0.941    | 0.240 | 0.182    | 17 |
| 2                                                                  | 0.864        | 0.302 | 0.232    | 65 | 0.843    | 0.697 | 0.415    | 17 |
| 3                                                                  | 0.869        | 0.335 | 0.244    | 66 | 0.808    | 0.415 | 0.328    | 16 |
| 4                                                                  | 0.878        | 0.325 | 0.244    | 66 | 0.718    | 0.423 | 0.335    | 16 |
| 5                                                                  | 0.868        | 0.333 | 0.254    | 66 | 0.720    | 0.444 | 0.332    | 16 |
| Bult2002- <i>npa</i> B3LYP 6-31G*/NPA/PUBCHEM MM-OPT $R^2=0.896$   |              |       |          |    |          |       |          |    |
| 1                                                                  | 0.849        | 0.341 | 0.258    | 65 | 0.960    | 0.215 | 0.162    | 17 |
| 2                                                                  | 0.924        | 0.225 | 0.175    | 65 | 0.752    | 0.597 | 0.392    | 17 |
| 3                                                                  | 0.887        | 0.312 | 0.222    | 66 | 0.741    | 0.416 | 0.363    | 16 |
| 4                                                                  | 0.884        | 0.317 | 0.225    | 66 | 0.835    | 0.339 | 0.265    | 16 |
| 5                                                                  | 0.864        | 0.338 | 0.249    | 66 | 0.931    | 0.211 | 0.168    | 16 |
| Bult2002- <i>npa</i> B3LYP 6-31G*/NPA/PUBCHEM NO-OPT $R^2=0.894$   |              |       |          |    |          |       |          |    |
| 1                                                                  | 0.838        | 0.354 | 0.262    | 65 | 0.956    | 0.231 | 0.208    | 17 |
| 2                                                                  | 0.922        | 0.228 | 0.170    | 65 | 0.725    | 0.631 | 0.419    | 17 |
| 3                                                                  | 0.871        | 0.333 | 0.235    | 66 | 0.828    | 0.337 | 0.293    | 16 |
| 4                                                                  | 0.872        | 0.332 | 0.230    | 66 | 0.847    | 0.337 | 0.261    | 16 |
| 5                                                                  | 0.856        | 0.349 | 0.251    | 66 | 0.912    | 0.241 | 0.195    | 16 |
| Bult2002- <i>npa</i> B3LYP 6-31G*/NPA/PUBCHEM QM-OPT $R^2=0.896$   |              |       |          |    |          |       |          |    |
| 1                                                                  | 0.868        | 0.319 | 0.236    | 65 | 0.979    | 0.177 | 0.142    | 17 |
| 2                                                                  | 0.920        | 0.232 | 0.170    | 65 | 0.841    | 0.485 | 0.333    | 17 |
| 3                                                                  | 0.904        | 0.287 | 0.204    | 66 | 0.818    | 0.371 | 0.296    | 16 |
| 4                                                                  | 0.903        | 0.289 | 0.202    | 66 | 0.867    | 0.336 | 0.272    | 16 |
| 5                                                                  | 0.890        | 0.304 | 0.211    | 66 | 0.884    | 0.273 | 0.185    | 16 |
| Bult2002- <i>npa</i> B3LYP 6-31G*/NPA/RDKIT MM-OPT $R^2=0.832$     |              |       |          |    |          |       |          |    |
| 1                                                                  | 0.845        | 0.346 | 0.280    | 65 | 0.924    | 0.273 | 0.206    | 17 |
| 2                                                                  | 0.859        | 0.308 | 0.247    | 65 | 0.879    | 0.521 | 0.345    | 17 |
| 3                                                                  | 0.906        | 0.285 | 0.222    | 66 | 0.525    | 0.550 | 0.461    | 16 |
| 4                                                                  | 0.884        | 0.317 | 0.253    | 66 | 0.726    | 0.411 | 0.350    | 16 |
| 5                                                                  | 0.868        | 0.334 | 0.259    | 66 | 0.850    | 0.332 | 0.266    | 16 |
| Bult2002- <i>npa</i> B3LYP 6-31G*/NPA/RDKIT QM-OPT $R^2=0.841$     |              |       |          |    |          |       |          |    |
| 1                                                                  | 0.864        | 0.324 | 0.253    | 65 | 0.942    | 0.255 | 0.194    | 17 |
| 2                                                                  | 0.880        | 0.283 | 0.235    | 65 | 0.794    | 0.623 | 0.440    | 17 |
| 3                                                                  | 0.925        | 0.254 | 0.195    | 66 | 0.584    | 0.569 | 0.425    | 16 |
| 4                                                                  | 0.892        | 0.306 | 0.241    | 66 | 0.780    | 0.358 | 0.304    | 16 |
| 5                                                                  | 0.882        | 0.316 | 0.249    | 66 | 0.856    | 0.306 | 0.213    | 16 |
| Bult2002- <i>npa</i> B3LYP 6-31G*/NPA/RDKIT MM-OPT $R^2=0.838$     |              |       |          |    |          |       |          |    |
| 1                                                                  | 0.851        | 0.339 | 0.256    | 65 | 0.933    | 0.256 | 0.211    | 17 |
| 2                                                                  | 0.870        | 0.295 | 0.230    | 65 | 0.877    | 0.461 | 0.318    | 17 |
| 3                                                                  | 0.887        | 0.312 | 0.223    | 66 | 0.858    | 0.392 | 0.328    | 16 |
| 4                                                                  | 0.896        | 0.300 | 0.222    | 66 | 0.751    | 0.420 | 0.322    | 16 |
| 5                                                                  | 0.863        | 0.340 | 0.256    | 66 | 0.920    | 0.240 | 0.192    | 16 |
| Bult2002- <i>npa</i> B3LYP 6-31G*/NPA/RDKIT NO-OPT $R^2=0.862$     |              |       |          |    |          |       |          |    |
| 1                                                                  | 0.870        | 0.316 | 0.238    | 65 | 0.941    | 0.235 | 0.191    | 17 |
| 2                                                                  | 0.896        | 0.264 | 0.205    | 65 | 0.882    | 0.499 | 0.385    | 17 |
| 3                                                                  | 0.899        | 0.295 | 0.221    | 66 | 0.858    | 0.338 | 0.269    | 16 |
| 4                                                                  | 0.906        | 0.285 | 0.219    | 66 | 0.789    | 0.363 | 0.273    | 16 |
| 5                                                                  | 0.885        | 0.311 | 0.229    | 66 | 0.900    | 0.351 | 0.252    | 16 |
| Bult2004- <i>aim</i> B3LYP 6-31G*/AIM/BALLOON MM-OPT $R^2=0.843$   |              |       |          |    |          |       |          |    |
| 1                                                                  | 0.805        | 0.388 | 0.316    | 65 | 0.941    | 0.256 | 0.229    | 17 |
| 2                                                                  | 0.883        | 0.281 | 0.230    | 65 | 0.745    | 0.638 | 0.454    | 17 |

Table S5: Cross-validation results.

| Fold                                                       | Training set |       |          |    | Test set |       |          |    |
|------------------------------------------------------------|--------------|-------|----------|----|----------|-------|----------|----|
|                                                            | $R^2$        | RMSE  | $\Delta$ | N  | $Q^2$    | RMSE  | $\Delta$ | N  |
| 3                                                          | 0.841        | 0.370 | 0.291    | 66 | 0.808    | 0.399 | 0.345    | 16 |
| 4                                                          | 0.855        | 0.354 | 0.281    | 66 | 0.652    | 0.411 | 0.345    | 16 |
| 5                                                          | 0.832        | 0.377 | 0.302    | 66 | 0.896    | 0.306 | 0.272    | 16 |
| Bult2004-aim B3LYP 6-31G*/AIM/BALLOON NO-OPT $R^2=0.845$   |              |       |          |    |          |       |          |    |
| 1                                                          | 0.822        | 0.370 | 0.295    | 65 | 0.951    | 0.237 | 0.199    | 17 |
| 2                                                          | 0.882        | 0.281 | 0.224    | 65 | 0.805    | 0.551 | 0.421    | 17 |
| 3                                                          | 0.857        | 0.351 | 0.272    | 66 | 0.790    | 0.353 | 0.292    | 16 |
| 4                                                          | 0.869        | 0.336 | 0.262    | 66 | 0.701    | 0.379 | 0.293    | 16 |
| 5                                                          | 0.848        | 0.359 | 0.282    | 66 | 0.934    | 0.304 | 0.279    | 16 |
| Bult2004-aim B3LYP 6-31G*/AIM/BALLOON QM-OPT $R^2=0.860$   |              |       |          |    |          |       |          |    |
| 1                                                          | 0.830        | 0.362 | 0.300    | 65 | 0.919    | 0.303 | 0.250    | 17 |
| 2                                                          | 0.892        | 0.269 | 0.207    | 65 | 0.738    | 0.680 | 0.432    | 17 |
| 3                                                          | 0.857        | 0.350 | 0.284    | 66 | 0.786    | 0.382 | 0.315    | 16 |
| 4                                                          | 0.869        | 0.336 | 0.267    | 66 | 0.691    | 0.397 | 0.307    | 16 |
| 5                                                          | 0.851        | 0.355 | 0.287    | 66 | 0.909    | 0.327 | 0.290    | 16 |
| Bult2004-aim B3LYP 6-31G*/AIM/FROG2 MM-OPT $R^2=0.825$     |              |       |          |    |          |       |          |    |
| 1                                                          | 0.821        | 0.372 | 0.298    | 65 | 0.939    | 0.271 | 0.237    | 17 |
| 2                                                          | 0.871        | 0.294 | 0.235    | 65 | 0.812    | 0.533 | 0.415    | 17 |
| 3                                                          | 0.860        | 0.347 | 0.259    | 66 | 0.753    | 0.403 | 0.340    | 16 |
| 4                                                          | 0.859        | 0.349 | 0.283    | 66 | 0.639    | 0.421 | 0.324    | 16 |
| 5                                                          | 0.854        | 0.351 | 0.280    | 66 | 0.653    | 0.511 | 0.368    | 16 |
| Bult2004-aim B3LYP 6-31G*/AIM/FROG2 NO-OPT $R^2=0.821$     |              |       |          |    |          |       |          |    |
| 1                                                          | 0.848        | 0.342 | 0.251    | 65 | 0.939    | 0.259 | 0.188    | 17 |
| 2                                                          | 0.855        | 0.311 | 0.210    | 65 | 0.905    | 0.401 | 0.263    | 17 |
| 3                                                          | 0.886        | 0.313 | 0.225    | 66 | 0.812    | 0.390 | 0.312    | 16 |
| 4                                                          | 0.894        | 0.303 | 0.222    | 66 | 0.596    | 0.625 | 0.421    | 16 |
| 5                                                          | 0.885        | 0.312 | 0.224    | 66 | 0.787    | 0.400 | 0.235    | 16 |
| Bult2004-aim B3LYP 6-31G*/AIM/FROG2 QM-OPT $R^2=0.870$     |              |       |          |    |          |       |          |    |
| 1                                                          | 0.854        | 0.336 | 0.258    | 65 | 0.932    | 0.282 | 0.222    | 17 |
| 2                                                          | 0.911        | 0.244 | 0.180    | 65 | 0.801    | 0.554 | 0.419    | 17 |
| 3                                                          | 0.872        | 0.332 | 0.253    | 66 | 0.906    | 0.280 | 0.226    | 16 |
| 4                                                          | 0.884        | 0.317 | 0.240    | 66 | 0.745    | 0.347 | 0.269    | 16 |
| 5                                                          | 0.870        | 0.332 | 0.251    | 66 | 0.907    | 0.310 | 0.243    | 16 |
| Bult2004-aim B3LYP 6-31G*/AIM/NCI MM-OPT $R^2=0.833$       |              |       |          |    |          |       |          |    |
| 1                                                          | 0.795        | 0.398 | 0.308    | 65 | 0.944    | 0.262 | 0.239    | 17 |
| 2                                                          | 0.880        | 0.284 | 0.218    | 65 | 0.736    | 0.638 | 0.458    | 17 |
| 3                                                          | 0.828        | 0.385 | 0.296    | 66 | 0.858    | 0.360 | 0.324    | 16 |
| 4                                                          | 0.843        | 0.369 | 0.279    | 66 | 0.712    | 0.388 | 0.294    | 16 |
| 5                                                          | 0.871        | 0.331 | 0.274    | 66 | 0.016    | 1.304 | 0.632    | 16 |
| Bult2004-aim B3LYP 6-31G*/AIM/NCI NO-OPT $R^2=0.843$       |              |       |          |    |          |       |          |    |
| 1                                                          | 0.862        | 0.326 | 0.270    | 65 | 0.942    | 0.271 | 0.239    | 17 |
| 2                                                          | 0.888        | 0.274 | 0.219    | 65 | 0.863    | 0.483 | 0.374    | 17 |
| 3                                                          | 0.879        | 0.323 | 0.270    | 66 | 0.899    | 0.291 | 0.235    | 16 |
| 4                                                          | 0.894        | 0.302 | 0.245    | 66 | 0.742    | 0.358 | 0.308    | 16 |
| 5                                                          | 0.883        | 0.315 | 0.259    | 66 | 0.806    | 0.350 | 0.312    | 16 |
| Bult2004-aim B3LYP 6-31G*/AIM/NCI QM-OPT $R^2=0.838$       |              |       |          |    |          |       |          |    |
| 1                                                          | 0.805        | 0.388 | 0.310    | 65 | 0.932    | 0.283 | 0.242    | 17 |
| 2                                                          | 0.885        | 0.278 | 0.210    | 65 | 0.647    | 0.809 | 0.502    | 17 |
| 3                                                          | 0.851        | 0.358 | 0.289    | 66 | 0.733    | 0.475 | 0.375    | 16 |
| 4                                                          | 0.856        | 0.353 | 0.281    | 66 | 0.661    | 0.435 | 0.320    | 16 |
| 5                                                          | 0.877        | 0.322 | 0.269    | 66 | 0.076    | 1.062 | 0.544    | 16 |
| Bult2004-aim B3LYP 6-31G*/AIM/OPENBABEL MM-OPT $R^2=0.820$ |              |       |          |    |          |       |          |    |
| 1                                                          | 0.798        | 0.395 | 0.320    | 65 | 0.965    | 0.224 | 0.191    | 17 |
| 2                                                          | 0.864        | 0.302 | 0.238    | 65 | 0.816    | 0.594 | 0.422    | 17 |
| 3                                                          | 0.840        | 0.371 | 0.288    | 66 | 0.917    | 0.371 | 0.310    | 16 |
| 4                                                          | 0.854        | 0.356 | 0.272    | 66 | 0.651    | 0.409 | 0.342    | 16 |
| 5                                                          | 0.847        | 0.359 | 0.290    | 66 | 0.601    | 0.538 | 0.361    | 16 |
| Bult2004-aim B3LYP 6-31G*/AIM/OPENBABEL NO-OPT $R^2=0.820$ |              |       |          |    |          |       |          |    |
| 1                                                          | 0.786        | 0.406 | 0.329    | 65 | 0.962    | 0.222 | 0.201    | 17 |

Table S5: Cross-validation results.

| Fold                                                       | Training set |       |          |    | Test set |       |          |    |
|------------------------------------------------------------|--------------|-------|----------|----|----------|-------|----------|----|
|                                                            | $R^2$        | RMSE  | $\Delta$ | N  | $Q^2$    | RMSE  | $\Delta$ | N  |
| 2                                                          | 0.864        | 0.301 | 0.238    | 65 | 0.791    | 0.647 | 0.453    | 17 |
| 3                                                          | 0.833        | 0.379 | 0.295    | 66 | 0.883    | 0.396 | 0.332    | 16 |
| 4                                                          | 0.844        | 0.367 | 0.286    | 66 | 0.651    | 0.412 | 0.340    | 16 |
| 5                                                          | 0.840        | 0.368 | 0.295    | 66 | 0.546    | 0.570 | 0.389    | 16 |
| Bult2004-aim B3LYP 6-31G*/AIM/OPENBABEL QM-OPT $R^2=0.846$ |              |       |          |    |          |       |          |    |
| 1                                                          | 0.817        | 0.376 | 0.300    | 65 | 0.970    | 0.206 | 0.182    | 17 |
| 2                                                          | 0.887        | 0.275 | 0.207    | 65 | 0.813    | 0.623 | 0.424    | 17 |
| 3                                                          | 0.855        | 0.353 | 0.273    | 66 | 0.909    | 0.366 | 0.300    | 16 |
| 4                                                          | 0.868        | 0.338 | 0.258    | 66 | 0.689    | 0.392 | 0.322    | 16 |
| 5                                                          | 0.873        | 0.328 | 0.263    | 66 | 0.542    | 0.588 | 0.381    | 16 |
| Bult2004-aim B3LYP 6-31G*/AIM/PUBCHEM MM-OPT $R^2=0.859$   |              |       |          |    |          |       |          |    |
| 1                                                          | 0.851        | 0.339 | 0.263    | 65 | 0.948    | 0.272 | 0.248    | 17 |
| 2                                                          | 0.901        | 0.257 | 0.191    | 65 | 0.807    | 0.521 | 0.392    | 17 |
| 3                                                          | 0.873        | 0.331 | 0.258    | 66 | 0.698    | 0.407 | 0.300    | 16 |
| 4                                                          | 0.883        | 0.318 | 0.238    | 66 | 0.761    | 0.343 | 0.264    | 16 |
| 5                                                          | 0.865        | 0.337 | 0.268    | 66 | 0.899    | 0.278 | 0.241    | 16 |
| Bult2004-aim B3LYP 6-31G*/AIM/PUBCHEM NO-OPT $R^2=0.862$   |              |       |          |    |          |       |          |    |
| 1                                                          | 0.856        | 0.333 | 0.256    | 65 | 0.924    | 0.298 | 0.232    | 17 |
| 2                                                          | 0.906        | 0.251 | 0.187    | 65 | 0.791    | 0.537 | 0.394    | 17 |
| 3                                                          | 0.880        | 0.322 | 0.248    | 66 | 0.399    | 0.768 | 0.382    | 16 |
| 4                                                          | 0.883        | 0.319 | 0.238    | 66 | 0.768    | 0.332 | 0.256    | 16 |
| 5                                                          | 0.871        | 0.331 | 0.257    | 66 | 0.910    | 0.309 | 0.241    | 16 |
| Bult2004-aim B3LYP 6-31G*/AIM/PUBCHEM QM-OPT $R^2=0.871$   |              |       |          |    |          |       |          |    |
| 1                                                          | 0.879        | 0.306 | 0.235    | 65 | 0.939    | 0.276 | 0.243    | 17 |
| 2                                                          | 0.911        | 0.244 | 0.179    | 65 | 0.862    | 0.457 | 0.351    | 17 |
| 3                                                          | 0.891        | 0.306 | 0.239    | 66 | 0.806    | 0.327 | 0.231    | 16 |
| 4                                                          | 0.908        | 0.282 | 0.211    | 66 | 0.744    | 0.353 | 0.283    | 16 |
| 5                                                          | 0.884        | 0.313 | 0.248    | 66 | 0.937    | 0.224 | 0.184    | 16 |
| Bult2004-aim B3LYP 6-31G*/AIM/RDKIT MM-OPT $R^2=0.853$     |              |       |          |    |          |       |          |    |
| 1                                                          | 0.811        | 0.382 | 0.311    | 65 | 0.953    | 0.240 | 0.215    | 17 |
| 2                                                          | 0.895        | 0.265 | 0.205    | 65 | 0.750    | 0.661 | 0.437    | 17 |
| 3                                                          | 0.850        | 0.359 | 0.279    | 66 | 0.779    | 0.404 | 0.348    | 16 |
| 4                                                          | 0.854        | 0.356 | 0.285    | 66 | 0.727    | 0.361 | 0.295    | 16 |
| 5                                                          | 0.845        | 0.361 | 0.296    | 66 | 0.862    | 0.376 | 0.319    | 16 |
| Bult2004-aim B3LYP 6-31G*/AIM/RDKIT QM-OPT $R^2=0.847$     |              |       |          |    |          |       |          |    |
| 1                                                          | 0.834        | 0.358 | 0.286    | 65 | 0.906    | 0.323 | 0.288    | 17 |
| 2                                                          | 0.887        | 0.275 | 0.213    | 65 | 0.744    | 0.683 | 0.418    | 17 |
| 3                                                          | 0.865        | 0.341 | 0.277    | 66 | 0.822    | 0.439 | 0.369    | 16 |
| 4                                                          | 0.866        | 0.341 | 0.270    | 66 | 0.720    | 0.378 | 0.289    | 16 |
| 5                                                          | 0.849        | 0.357 | 0.292    | 66 | 0.865    | 0.334 | 0.273    | 16 |
| Bult2004-aim B3LYP 6-31G*/AIM/RDKIT MM-OPT $R^2=0.812$     |              |       |          |    |          |       |          |    |
| 1                                                          | 0.833        | 0.359 | 0.303    | 65 | 0.907    | 0.304 | 0.259    | 17 |
| 2                                                          | 0.858        | 0.308 | 0.252    | 65 | 0.829    | 0.520 | 0.413    | 17 |
| 3                                                          | 0.867        | 0.339 | 0.278    | 66 | 0.788    | 0.397 | 0.342    | 16 |
| 4                                                          | 0.871        | 0.334 | 0.282    | 66 | 0.707    | 0.394 | 0.319    | 16 |
| 5                                                          | 0.846        | 0.361 | 0.301    | 66 | 0.865    | 0.296 | 0.268    | 16 |
| Bult2004-aim B3LYP 6-31G*/AIM/RDKIT NO-OPT $R^2=0.821$     |              |       |          |    |          |       |          |    |
| 1                                                          | 0.855        | 0.334 | 0.273    | 65 | 0.931    | 0.269 | 0.209    | 17 |
| 2                                                          | 0.873        | 0.291 | 0.228    | 65 | 0.870    | 0.449 | 0.382    | 17 |
| 3                                                          | 0.890        | 0.307 | 0.250    | 66 | 0.696    | 0.391 | 0.306    | 16 |
| 4                                                          | 0.885        | 0.316 | 0.253    | 66 | 0.766    | 0.336 | 0.270    | 16 |
| 5                                                          | 0.877        | 0.323 | 0.258    | 66 | 0.826    | 0.384 | 0.315    | 16 |
| Chavez2006 B3LYP 6-31G*/MPA/BALLOON MM-OPT $R^2=0.887$     |              |       |          |    |          |       |          |    |
| 1                                                          | 0.911        | 0.262 | 0.215    | 65 | 0.931    | 0.264 | 0.214    | 17 |
| 2                                                          | 0.913        | 0.242 | 0.190    | 65 | 0.870    | 0.416 | 0.314    | 17 |
| 3                                                          | 0.918        | 0.266 | 0.215    | 66 | 0.904    | 0.234 | 0.212    | 16 |
| 4                                                          | 0.934        | 0.239 | 0.193    | 66 | 0.794    | 0.339 | 0.284    | 16 |
| 5                                                          | 0.918        | 0.263 | 0.220    | 66 | 0.897    | 0.255 | 0.189    | 16 |
| Chavez2006 B3LYP 6-31G*/MPA/BALLOON NO-OPT $R^2=0.891$     |              |       |          |    |          |       |          |    |

Table S5: Cross-validation results.

| Fold                                                     | Training set |       |          |    | Test set |       |          |    |
|----------------------------------------------------------|--------------|-------|----------|----|----------|-------|----------|----|
|                                                          | $R^2$        | RMSE  | $\Delta$ | N  | $Q^2$    | RMSE  | $\Delta$ | N  |
| 1                                                        | 0.918        | 0.251 | 0.203    | 65 | 0.938    | 0.257 | 0.182    | 17 |
| 2                                                        | 0.918        | 0.235 | 0.185    | 65 | 0.894    | 0.375 | 0.303    | 17 |
| 3                                                        | 0.931        | 0.244 | 0.194    | 66 | 0.851    | 0.275 | 0.245    | 16 |
| 4                                                        | 0.940        | 0.228 | 0.184    | 66 | 0.814    | 0.327 | 0.257    | 16 |
| 5                                                        | 0.919        | 0.261 | 0.213    | 66 | 0.940    | 0.201 | 0.152    | 16 |
| Chavez2006 B3LYP 6-31G*/MPA/BALLOON QM-OPT $R^2=0.889$   |              |       |          |    |          |       |          |    |
| 1                                                        | 0.909        | 0.265 | 0.211    | 65 | 0.937    | 0.249 | 0.186    | 17 |
| 2                                                        | 0.913        | 0.241 | 0.189    | 65 | 0.863    | 0.436 | 0.324    | 17 |
| 3                                                        | 0.924        | 0.256 | 0.202    | 66 | 0.850    | 0.278 | 0.236    | 16 |
| 4                                                        | 0.932        | 0.242 | 0.190    | 66 | 0.807    | 0.332 | 0.272    | 16 |
| 5                                                        | 0.917        | 0.264 | 0.213    | 66 | 0.903    | 0.250 | 0.187    | 16 |
| Chavez2006 B3LYP 6-31G*/MPA/FROG2 MM-OPT $R^2=0.900$     |              |       |          |    |          |       |          |    |
| 1                                                        | 0.863        | 0.325 | 0.227    | 65 | 0.961    | 0.194 | 0.152    | 17 |
| 2                                                        | 0.925        | 0.224 | 0.164    | 65 | 0.796    | 0.525 | 0.318    | 17 |
| 3                                                        | 0.893        | 0.303 | 0.211    | 66 | 0.839    | 0.315 | 0.258    | 16 |
| 4                                                        | 0.894        | 0.303 | 0.202    | 66 | 0.744    | 0.412 | 0.290    | 16 |
| 5                                                        | 0.887        | 0.309 | 0.220    | 66 | 0.841    | 0.335 | 0.232    | 16 |
| Chavez2006 B3LYP 6-31G*/MPA/FROG2 NO-OPT $R^2=0.849$     |              |       |          |    |          |       |          |    |
| 1                                                        | 0.846        | 0.345 | 0.267    | 65 | 0.965    | 0.181 | 0.158    | 17 |
| 2                                                        | 0.886        | 0.276 | 0.210    | 65 | 0.841    | 0.472 | 0.332    | 17 |
| 3                                                        | 0.879        | 0.322 | 0.239    | 66 | 0.887    | 0.321 | 0.293    | 16 |
| 4                                                        | 0.916        | 0.270 | 0.191    | 66 | 0.500    | 0.735 | 0.456    | 16 |
| 5                                                        | 0.883        | 0.314 | 0.243    | 66 | 0.830    | 0.359 | 0.266    | 16 |
| Chavez2006 B3LYP 6-31G*/MPA/FROG2 QM-OPT $R^2=0.910$     |              |       |          |    |          |       |          |    |
| 1                                                        | 0.874        | 0.311 | 0.223    | 65 | 0.965    | 0.182 | 0.143    | 17 |
| 2                                                        | 0.936        | 0.207 | 0.157    | 65 | 0.792    | 0.531 | 0.333    | 17 |
| 3                                                        | 0.896        | 0.299 | 0.208    | 66 | 0.892    | 0.246 | 0.201    | 16 |
| 4                                                        | 0.913        | 0.275 | 0.191    | 66 | 0.426    | 0.735 | 0.372    | 16 |
| 5                                                        | 0.901        | 0.289 | 0.207    | 66 | 0.855    | 0.325 | 0.199    | 16 |
| Chavez2006 B3LYP 6-31G*/MPA/NCI MM-OPT $R^2=0.892$       |              |       |          |    |          |       |          |    |
| 1                                                        | 0.908        | 0.267 | 0.204    | 65 | 0.948    | 0.226 | 0.156    | 17 |
| 2                                                        | 0.920        | 0.231 | 0.172    | 65 | 0.838    | 0.465 | 0.320    | 17 |
| 3                                                        | 0.921        | 0.260 | 0.204    | 66 | 0.898    | 0.251 | 0.220    | 16 |
| 4                                                        | 0.944        | 0.219 | 0.169    | 66 | 0.763    | 0.383 | 0.324    | 16 |
| 5                                                        | 0.918        | 0.263 | 0.203    | 66 | 0.892    | 0.278 | 0.191    | 16 |
| Chavez2006 B3LYP 6-31G*/MPA/NCI NO-OPT $R^2=0.897$       |              |       |          |    |          |       |          |    |
| 1                                                        | 0.915        | 0.257 | 0.200    | 65 | 0.957    | 0.200 | 0.140    | 17 |
| 2                                                        | 0.921        | 0.229 | 0.173    | 65 | 0.901    | 0.364 | 0.275    | 17 |
| 3                                                        | 0.927        | 0.251 | 0.193    | 66 | 0.916    | 0.234 | 0.203    | 16 |
| 4                                                        | 0.948        | 0.212 | 0.170    | 66 | 0.806    | 0.360 | 0.284    | 16 |
| 5                                                        | 0.923        | 0.255 | 0.200    | 66 | 0.940    | 0.204 | 0.173    | 16 |
| Chavez2006 B3LYP 6-31G*/MPA/NCI QM-OPT $R^2=0.896$       |              |       |          |    |          |       |          |    |
| 1                                                        | 0.913        | 0.259 | 0.209    | 65 | 0.955    | 0.216 | 0.166    | 17 |
| 2                                                        | 0.921        | 0.230 | 0.178    | 65 | 0.829    | 0.481 | 0.323    | 17 |
| 3                                                        | 0.925        | 0.253 | 0.202    | 66 | 0.897    | 0.254 | 0.216    | 16 |
| 4                                                        | 0.939        | 0.230 | 0.185    | 66 | 0.823    | 0.322 | 0.269    | 16 |
| 5                                                        | 0.931        | 0.241 | 0.191    | 66 | 0.826    | 0.343 | 0.238    | 16 |
| Chavez2006 B3LYP 6-31G*/MPA/OPENBABEL MM-OPT $R^2=0.857$ |              |       |          |    |          |       |          |    |
| 1                                                        | 0.891        | 0.290 | 0.229    | 65 | 0.934    | 0.266 | 0.178    | 17 |
| 2                                                        | 0.886        | 0.277 | 0.208    | 65 | 0.926    | 0.316 | 0.258    | 17 |
| 3                                                        | 0.904        | 0.287 | 0.222    | 66 | 0.888    | 0.271 | 0.213    | 16 |
| 4                                                        | 0.923        | 0.259 | 0.200    | 66 | 0.750    | 0.376 | 0.308    | 16 |
| 5                                                        | 0.914        | 0.270 | 0.211    | 66 | 0.818    | 0.348 | 0.264    | 16 |
| Chavez2006 B3LYP 6-31G*/MPA/OPENBABEL NO-OPT $R^2=0.851$ |              |       |          |    |          |       |          |    |
| 1                                                        | 0.884        | 0.299 | 0.238    | 65 | 0.932    | 0.264 | 0.186    | 17 |
| 2                                                        | 0.881        | 0.282 | 0.214    | 65 | 0.913    | 0.345 | 0.273    | 17 |
| 3                                                        | 0.901        | 0.291 | 0.230    | 66 | 0.868    | 0.286 | 0.223    | 16 |
| 4                                                        | 0.917        | 0.268 | 0.210    | 66 | 0.747    | 0.376 | 0.307    | 16 |
| 5                                                        | 0.908        | 0.279 | 0.223    | 66 | 0.820    | 0.345 | 0.264    | 16 |

Table S5: Cross-validation results.

| Fold                                                     | Training set |       |          |    | Test set |       |          |    |
|----------------------------------------------------------|--------------|-------|----------|----|----------|-------|----------|----|
|                                                          | $R^2$        | RMSE  | $\Delta$ | N  | $Q^2$    | RMSE  | $\Delta$ | N  |
| Chavez2006 B3LYP 6-31G*/MPA/OPENBABEL QM-OPT $R^2=0.875$ |              |       |          |    |          |       |          |    |
| 1                                                        | 0.899        | 0.279 | 0.218    | 65 | 0.942    | 0.239 | 0.156    | 17 |
| 2                                                        | 0.899        | 0.260 | 0.195    | 65 | 0.917    | 0.336 | 0.262    | 17 |
| 3                                                        | 0.913        | 0.274 | 0.209    | 66 | 0.901    | 0.263 | 0.223    | 16 |
| 4                                                        | 0.932        | 0.242 | 0.185    | 66 | 0.756    | 0.370 | 0.298    | 16 |
| 5                                                        | 0.919        | 0.261 | 0.206    | 66 | 0.826    | 0.341 | 0.255    | 16 |
| Chavez2006 B3LYP 6-31G*/MPA/PUBCHEM MM-OPT $R^2=0.920$   |              |       |          |    |          |       |          |    |
| 1                                                        | 0.876        | 0.309 | 0.218    | 65 | 0.981    | 0.136 | 0.107    | 17 |
| 2                                                        | 0.944        | 0.195 | 0.151    | 65 | 0.794    | 0.525 | 0.334    | 17 |
| 3                                                        | 0.905        | 0.286 | 0.195    | 66 | 0.818    | 0.340 | 0.278    | 16 |
| 4                                                        | 0.914        | 0.272 | 0.180    | 66 | 0.826    | 0.336 | 0.266    | 16 |
| 5                                                        | 0.892        | 0.303 | 0.216    | 66 | 0.954    | 0.177 | 0.141    | 16 |
| Chavez2006 B3LYP 6-31G*/MPA/PUBCHEM NO-OPT $R^2=0.916$   |              |       |          |    |          |       |          |    |
| 1                                                        | 0.866        | 0.322 | 0.226    | 65 | 0.965    | 0.181 | 0.135    | 17 |
| 2                                                        | 0.940        | 0.201 | 0.152    | 65 | 0.770    | 0.554 | 0.345    | 17 |
| 3                                                        | 0.888        | 0.311 | 0.215    | 66 | 0.889    | 0.266 | 0.240    | 16 |
| 4                                                        | 0.900        | 0.294 | 0.186    | 66 | 0.847    | 0.321 | 0.251    | 16 |
| 5                                                        | 0.884        | 0.313 | 0.223    | 66 | 0.916    | 0.243 | 0.185    | 16 |
| Chavez2006 B3LYP 6-31G*/MPA/PUBCHEM QM-OPT $R^2=0.917$   |              |       |          |    |          |       |          |    |
| 1                                                        | 0.905        | 0.271 | 0.204    | 65 | 0.979    | 0.139 | 0.112    | 17 |
| 2                                                        | 0.939        | 0.202 | 0.156    | 65 | 0.888    | 0.386 | 0.284    | 17 |
| 3                                                        | 0.928        | 0.249 | 0.187    | 66 | 0.862    | 0.298 | 0.216    | 16 |
| 4                                                        | 0.933        | 0.241 | 0.167    | 66 | 0.876    | 0.298 | 0.237    | 16 |
| 5                                                        | 0.920        | 0.260 | 0.193    | 66 | 0.933    | 0.212 | 0.145    | 16 |
| Chavez2006 B3LYP 6-31G*/MPA/RDKIT MM-OPT $R^2=0.886$     |              |       |          |    |          |       |          |    |
| 1                                                        | 0.912        | 0.261 | 0.202    | 65 | 0.933    | 0.264 | 0.175    | 17 |
| 2                                                        | 0.911        | 0.244 | 0.191    | 65 | 0.924    | 0.335 | 0.261    | 17 |
| 3                                                        | 0.928        | 0.249 | 0.198    | 66 | 0.802    | 0.339 | 0.266    | 16 |
| 4                                                        | 0.935        | 0.238 | 0.181    | 66 | 0.819    | 0.342 | 0.273    | 16 |
| 5                                                        | 0.920        | 0.260 | 0.205    | 66 | 0.913    | 0.261 | 0.191    | 16 |
| Chavez2006 B3LYP 6-31G*/MPA/RDKIT QM-OPT $R^2=0.882$     |              |       |          |    |          |       |          |    |
| 1                                                        | 0.906        | 0.269 | 0.218    | 65 | 0.936    | 0.257 | 0.191    | 17 |
| 2                                                        | 0.913        | 0.242 | 0.194    | 65 | 0.889    | 0.401 | 0.305    | 17 |
| 3                                                        | 0.929        | 0.248 | 0.201    | 66 | 0.791    | 0.388 | 0.286    | 16 |
| 4                                                        | 0.924        | 0.256 | 0.201    | 66 | 0.827    | 0.311 | 0.248    | 16 |
| 5                                                        | 0.919        | 0.262 | 0.211    | 66 | 0.859    | 0.298 | 0.219    | 16 |
| Chavez2006 B3LYP 6-31G*/MPA/RDKIT MM-OPT $R^2=0.874$     |              |       |          |    |          |       |          |    |
| 1                                                        | 0.897        | 0.281 | 0.219    | 65 | 0.929    | 0.272 | 0.193    | 17 |
| 2                                                        | 0.903        | 0.255 | 0.203    | 65 | 0.870    | 0.422 | 0.306    | 17 |
| 3                                                        | 0.912        | 0.275 | 0.209    | 66 | 0.875    | 0.287 | 0.249    | 16 |
| 4                                                        | 0.928        | 0.249 | 0.192    | 66 | 0.784    | 0.372 | 0.288    | 16 |
| 5                                                        | 0.906        | 0.282 | 0.217    | 66 | 0.899    | 0.265 | 0.207    | 16 |
| Chavez2006 B3LYP 6-31G*/MPA/RDKIT NO-OPT $R^2=0.900$     |              |       |          |    |          |       |          |    |
| 1                                                        | 0.927        | 0.238 | 0.185    | 65 | 0.950    | 0.238 | 0.189    | 17 |
| 2                                                        | 0.931        | 0.215 | 0.174    | 65 | 0.924    | 0.320 | 0.256    | 17 |
| 3                                                        | 0.931        | 0.244 | 0.192    | 66 | 0.933    | 0.207 | 0.178    | 16 |
| 4                                                        | 0.945        | 0.217 | 0.170    | 66 | 0.853    | 0.306 | 0.234    | 16 |
| 5                                                        | 0.929        | 0.245 | 0.190    | 66 | 0.942    | 0.248 | 0.179    | 16 |
| QM B3LYP 6-31G*/AIM/BALLOON MM-OPT $R^2=0.801$           |              |       |          |    |          |       |          |    |
| 1                                                        | 0.828        | 0.365 | 0.284    | 65 | 0.908    | 0.356 | 0.267    | 17 |
| 2                                                        | 0.813        | 0.354 | 0.264    | 65 | 0.766    | 0.588 | 0.342    | 17 |
| 3                                                        | 0.881        | 0.321 | 0.236    | 66 | 0.483    | 0.514 | 0.370    | 16 |
| 4                                                        | 0.874        | 0.331 | 0.259    | 66 | 0.733    | 0.477 | 0.381    | 16 |
| 5                                                        | 0.842        | 0.365 | 0.277    | 66 | 0.832    | 0.326 | 0.249    | 16 |
| QM B3LYP 6-31G*/AIM/BALLOON NO-OPT $R^2=0.777$           |              |       |          |    |          |       |          |    |
| 1                                                        | 0.819        | 0.374 | 0.280    | 65 | 0.899    | 0.385 | 0.299    | 17 |
| 2                                                        | 0.777        | 0.386 | 0.300    | 65 | 0.776    | 0.561 | 0.306    | 17 |
| 3                                                        | 0.857        | 0.350 | 0.270    | 66 | 0.663    | 0.462 | 0.374    | 16 |
| 4                                                        | 0.849        | 0.361 | 0.265    | 66 | 0.761    | 0.418 | 0.355    | 16 |



Table S5: Cross-validation results.

| Fold                                             | Training set |       |          |    | Test set |         |          |    |
|--------------------------------------------------|--------------|-------|----------|----|----------|---------|----------|----|
|                                                  | $R^2$        | RMSE  | $\Delta$ | N  | $Q^2$    | RMSE    | $\Delta$ | N  |
| 5                                                | 0.872        | 0.329 | 0.263    | 66 | 0.186    | 2.746   | 1.024    | 16 |
| QM B3LYP 6-31G*/AIM/BALLOON QM-OPT $R^2=0.823$   |              |       |          |    |          |         |          |    |
| 1                                                | 0.786        | 0.407 | 0.322    | 65 | 0.003    | 9.592   | 2.562    | 17 |
| 2                                                | 0.750        | 0.409 | 0.319    | 65 | 0.285    | 1.128   | 0.487    | 17 |
| 3                                                | 0.765        | 0.450 | 0.333    | 66 | 0.630    | 0.516   | 0.431    | 16 |
| 4                                                | 0.756        | 0.460 | 0.355    | 66 | 0.760    | 0.477   | 0.389    | 16 |
| 5                                                | 0.801        | 0.410 | 0.321    | 66 | 0.376    | 0.676   | 0.511    | 16 |
| QM B3LYP 6-31G*/AIM/FROG2 MM-OPT $R^2=0.901$     |              |       |          |    |          |         |          |    |
| 1                                                | 0.911        | 0.262 | 0.203    | 65 | 0.959    | 0.207   | 0.174    | 17 |
| 2                                                | 0.912        | 0.242 | 0.187    | 65 | 0.895    | 0.386   | 0.254    | 17 |
| 3                                                | 0.926        | 0.252 | 0.192    | 66 | 0.903    | 0.256   | 0.204    | 16 |
| 4                                                | 0.940        | 0.227 | 0.177    | 66 | 0.765    | 0.407   | 0.293    | 16 |
| 5                                                | 0.935        | 0.234 | 0.176    | 66 | 0.840    | 0.357   | 0.267    | 16 |
| QM B3LYP 6-31G*/AIM/FROG2 NO-OPT $R^2=0.880$     |              |       |          |    |          |         |          |    |
| 1                                                | 0.899        | 0.302 | 0.209    | 65 | 0.701    | 0.435   | 0.275    | 17 |
| 2                                                | 0.880        | 0.285 | 0.204    | 65 | 0.865    | 0.420   | 0.244    | 17 |
| 3                                                | 0.913        | 0.272 | 0.207    | 66 | 0.682    | 0.481   | 0.304    | 16 |
| 4                                                | 0.881        | 0.316 | 0.228    | 66 | 0.794    | 0.371   | 0.261    | 16 |
| 5                                                | 0.879        | 0.302 | 0.213    | 66 | 0.920    | 0.346   | 0.244    | 16 |
| QM B3LYP 6-31G*/AIM/FROG2 QM-OPT $R^2=0.908$     |              |       |          |    |          |         |          |    |
| 1                                                | 0.904        | 0.273 | 0.198    | 65 | 0.960    | 0.199   | 0.168    | 17 |
| 2                                                | 0.923        | 0.228 | 0.169    | 65 | 0.867    | 0.455   | 0.295    | 17 |
| 3                                                | 0.919        | 0.263 | 0.199    | 66 | 0.933    | 0.267   | 0.200    | 16 |
| 4                                                | 0.944        | 0.219 | 0.168    | 66 | 0.766    | 0.421   | 0.308    | 16 |
| 5                                                | 0.914        | 0.269 | 0.195    | 66 | 0.927    | 0.233   | 0.193    | 16 |
| QM B3LYP 6-31G*/AIM/NCI MM-OPT $R^2=0.886$       |              |       |          |    |          |         |          |    |
| 1                                                | 0.902        | 0.275 | 0.202    | 65 | 0.981    | 0.180   | 0.150    | 17 |
| 2                                                | 0.906        | 0.251 | 0.176    | 65 | 0.924    | 0.409   | 0.244    | 17 |
| 3                                                | 0.939        | 0.229 | 0.172    | 66 | 0.812    | 0.369   | 0.276    | 16 |
| 4                                                | 0.939        | 0.230 | 0.172    | 66 | 0.771    | 0.396   | 0.280    | 16 |
| 5                                                | 0.918        | 0.264 | 0.193    | 66 | 0.920    | 0.226   | 0.170    | 16 |
| QM B3LYP 6-31G*/AIM/NCI NO-OPT $R^2=0.884$       |              |       |          |    |          |         |          |    |
| 1                                                | 0.922        | 0.245 | 0.176    | 65 | 0.942    | 0.232   | 0.140    | 17 |
| 2                                                | 0.910        | 0.246 | 0.172    | 65 | 0.908    | 0.357   | 0.206    | 17 |
| 3                                                | 0.948        | 0.212 | 0.150    | 66 | 0.889    | 0.355   | 0.272    | 16 |
| 4                                                | 0.945        | 0.219 | 0.163    | 66 | 0.874    | 0.355   | 0.269    | 16 |
| 5                                                | 0.925        | 0.252 | 0.179    | 66 | 0.920    | 0.227   | 0.186    | 16 |
| QM B3LYP 6-31G*/AIM/NCI QM-OPT $R^2=0.886$       |              |       |          |    |          |         |          |    |
| 1                                                | 0.901        | 0.276 | 0.205    | 65 | 0.948    | 0.224   | 0.197    | 17 |
| 2                                                | 0.897        | 0.263 | 0.201    | 65 | 0.768    | 0.575   | 0.281    | 17 |
| 3                                                | 0.916        | 0.269 | 0.207    | 66 | 0.914    | 0.297   | 0.220    | 16 |
| 4                                                | 0.942        | 0.225 | 0.175    | 66 | 0.719    | 0.456   | 0.340    | 16 |
| 5                                                | 0.923        | 0.254 | 0.197    | 66 | 0.859    | 0.320   | 0.238    | 16 |
| QM B3LYP 6-31G*/AIM/OPENBABEL MM-OPT $R^2=0.844$ |              |       |          |    |          |         |          |    |
| 1                                                | 0.765        | 0.425 | 0.329    | 65 | 0.767    | 0.485   | 0.359    | 17 |
| 2                                                | 0.848        | 0.319 | 0.246    | 65 | 0.104    | 6.085   | 1.869    | 17 |
| 3                                                | 0.781        | 0.433 | 0.319    | 66 | 0.727    | 0.481   | 0.388    | 16 |
| 4                                                | 0.778        | 0.438 | 0.338    | 66 | 0.711    | 0.429   | 0.312    | 16 |
| 5                                                | 0.787        | 0.424 | 0.319    | 66 | 0.758    | 0.504   | 0.367    | 16 |
| QM B3LYP 6-31G*/AIM/OPENBABEL NO-OPT $R^2=0.849$ |              |       |          |    |          |         |          |    |
| 1                                                | 0.845        | 0.346 | 0.259    | 65 | 0.868    | 0.372   | 0.269    | 17 |
| 2                                                | 0.849        | 0.318 | 0.243    | 65 | 0.749    | 0.598   | 0.385    | 17 |
| 3                                                | 0.873        | 0.331 | 0.250    | 66 | 0.687    | 0.468   | 0.344    | 16 |
| 4                                                | 0.866        | 0.340 | 0.258    | 66 | 0.797    | 0.390   | 0.300    | 16 |
| 5                                                | 0.846        | 0.361 | 0.265    | 66 | 0.902    | 0.319   | 0.256    | 16 |
| QM B3LYP 6-31G*/AIM/OPENBABEL QM-OPT $R^2=0.834$ |              |       |          |    |          |         |          |    |
| 1                                                | 0.768        | 0.423 | 0.324    | 65 | 0.591    | 0.623   | 0.433    | 17 |
| 2                                                | 0.768        | 0.395 | 0.295    | 65 | 0.184    | 1.200   | 0.623    | 17 |
| 3                                                | 0.849        | 0.360 | 0.283    | 66 | 0.031    | 677.501 | 164.688  | 16 |

Table S5: Cross-validation results.

| Fold                                           | Training set |       |          |    | Test set |       |          |    |
|------------------------------------------------|--------------|-------|----------|----|----------|-------|----------|----|
|                                                | $R^2$        | RMSE  | $\Delta$ | N  | $Q^2$    | RMSE  | $\Delta$ | N  |
| 4                                              | 0.748        | 0.467 | 0.355    | 66 | 0.813    | 0.507 | 0.435    | 16 |
| 5                                              | 0.720        | 0.487 | 0.355    | 66 | 0.804    | 0.393 | 0.351    | 16 |
| QM B3LYP 6-31G*/AIM/PUBCHEM MM-OPT $R^2=0.906$ |              |       |          |    |          |       |          |    |
| 1                                              | 0.899        | 0.280 | 0.200    | 65 | 0.960    | 0.196 | 0.158    | 17 |
| 2                                              | 0.898        | 0.261 | 0.193    | 65 | 0.932    | 0.301 | 0.202    | 17 |
| 3                                              | 0.931        | 0.244 | 0.173    | 66 | 0.736    | 0.404 | 0.255    | 16 |
| 4                                              | 0.942        | 0.223 | 0.167    | 66 | 0.750    | 0.428 | 0.273    | 16 |
| 5                                              | 0.917        | 0.265 | 0.186    | 66 | 0.894    | 0.280 | 0.207    | 16 |
| QM B3LYP 6-31G*/AIM/PUBCHEM NO-OPT $R^2=0.914$ |              |       |          |    |          |       |          |    |
| 1                                              | 0.910        | 0.264 | 0.196    | 65 | 0.945    | 0.235 | 0.196    | 17 |
| 2                                              | 0.910        | 0.245 | 0.187    | 65 | 0.453    | 1.613 | 0.604    | 17 |
| 3                                              | 0.924        | 0.255 | 0.183    | 66 | 0.891    | 0.270 | 0.208    | 16 |
| 4                                              | 0.959        | 0.188 | 0.144    | 66 | 0.366    | 0.659 | 0.375    | 16 |
| 5                                              | 0.915        | 0.269 | 0.202    | 66 | 0.964    | 0.214 | 0.180    | 16 |
| QM B3LYP 6-31G*/AIM/PUBCHEM QM-OPT $R^2=0.885$ |              |       |          |    |          |       |          |    |
| 1                                              | 0.882        | 0.302 | 0.228    | 65 | 0.940    | 0.242 | 0.198    | 17 |
| 2                                              | 0.887        | 0.275 | 0.213    | 65 | 0.896    | 0.414 | 0.296    | 17 |
| 3                                              | 0.901        | 0.292 | 0.221    | 66 | 0.910    | 0.318 | 0.253    | 16 |
| 4                                              | 0.931        | 0.245 | 0.189    | 66 | 0.691    | 0.490 | 0.336    | 16 |
| 5                                              | 0.905        | 0.283 | 0.208    | 66 | 0.843    | 0.362 | 0.267    | 16 |
| QM B3LYP 6-31G*/AIM/RDKit MM-OPT $R^2=0.798$   |              |       |          |    |          |       |          |    |
| 1                                              | 0.826        | 0.366 | 0.278    | 65 | 0.864    | 0.380 | 0.255    | 17 |
| 2                                              | 0.847        | 0.320 | 0.241    | 65 | 0.194    | 5.366 | 1.547    | 17 |
| 3                                              | 0.875        | 0.328 | 0.233    | 66 | 0.627    | 0.575 | 0.427    | 16 |
| 4                                              | 0.873        | 0.331 | 0.265    | 66 | 0.576    | 0.577 | 0.374    | 16 |
| 5                                              | 0.842        | 0.366 | 0.284    | 66 | 0.727    | 0.521 | 0.353    | 16 |
| QM B3LYP 6-31G*/AIM/RDKit QM-OPT $R^2=0.852$   |              |       |          |    |          |       |          |    |
| 1                                              | 0.728        | 0.458 | 0.361    | 65 | 0.435    | 0.726 | 0.538    | 17 |
| 2                                              | 0.741        | 0.416 | 0.308    | 65 | 0.145    | 1.250 | 0.681    | 17 |
| 3                                              | 0.741        | 0.472 | 0.349    | 66 | 0.044    | 9.966 | 2.868    | 16 |
| 4                                              | 0.677        | 0.528 | 0.434    | 66 | 0.682    | 0.387 | 0.329    | 16 |
| 5                                              | 0.720        | 0.487 | 0.406    | 66 | 0.508    | 0.700 | 0.514    | 16 |
| QM B3LYP 6-31G*/AIM/RDKit MM-OPT $R^2=0.839$   |              |       |          |    |          |       |          |    |
| 1                                              | 0.840        | 0.351 | 0.276    | 65 | 0.828    | 0.492 | 0.316    | 17 |
| 2                                              | 0.809        | 0.358 | 0.281    | 65 | 0.486    | 0.922 | 0.432    | 17 |
| 3                                              | 0.857        | 0.350 | 0.267    | 66 | 0.660    | 0.499 | 0.382    | 16 |
| 4                                              | 0.855        | 0.354 | 0.263    | 66 | 0.710    | 0.461 | 0.389    | 16 |
| 5                                              | 0.818        | 0.393 | 0.305    | 66 | 0.872    | 0.293 | 0.247    | 16 |
| QM B3LYP 6-31G*/AIM/RDKit NO-OPT $R^2=0.778$   |              |       |          |    |          |       |          |    |
| 1                                              | 0.842        | 0.349 | 0.280    | 65 | 0.877    | 0.350 | 0.296    | 17 |
| 2                                              | 0.855        | 0.312 | 0.247    | 65 | 0.665    | 0.703 | 0.415    | 17 |
| 3                                              | 0.859        | 0.349 | 0.282    | 66 | 0.756    | 0.371 | 0.293    | 16 |
| 4                                              | 0.882        | 0.319 | 0.254    | 66 | 0.587    | 0.464 | 0.360    | 16 |
| 5                                              | 0.857        | 0.347 | 0.273    | 66 | 0.816    | 0.364 | 0.267    | 16 |
| QM B3LYP 6-31G*/MPA/BALLOON MM-OPT $R^2=0.482$ |              |       |          |    |          |       |          |    |
| 1                                              | 0.543        | 0.594 | 0.478    | 65 | 0.715    | 0.551 | 0.411    | 17 |
| 2                                              | 0.486        | 0.587 | 0.489    | 65 | 0.212    | 1.092 | 0.621    | 17 |
| 3                                              | 0.725        | 0.486 | 0.390    | 66 | 0.014    | 0.930 | 0.685    | 16 |
| 4                                              | 0.620        | 0.573 | 0.434    | 66 | 0.597    | 0.663 | 0.571    | 16 |
| 5                                              | 0.620        | 0.567 | 0.438    | 66 | 0.303    | 0.664 | 0.538    | 16 |
| QM B3LYP 6-31G*/MPA/BALLOON NO-OPT $R^2=0.589$ |              |       |          |    |          |       |          |    |
| 1                                              | 0.673        | 0.502 | 0.394    | 65 | 0.872    | 0.368 | 0.314    | 17 |
| 2                                              | 0.647        | 0.486 | 0.393    | 65 | 0.490    | 0.841 | 0.507    | 17 |
| 3                                              | 0.783        | 0.432 | 0.354    | 66 | 0.307    | 0.664 | 0.515    | 16 |
| 4                                              | 0.755        | 0.460 | 0.361    | 66 | 0.498    | 0.571 | 0.450    | 16 |
| 5                                              | 0.750        | 0.459 | 0.352    | 66 | 0.530    | 0.549 | 0.481    | 16 |
| QM B3LYP 6-31G*/MPA/BALLOON QM-OPT $R^2=0.521$ |              |       |          |    |          |       |          |    |
| 1                                              | 0.614        | 0.545 | 0.438    | 65 | 0.612    | 0.619 | 0.539    | 17 |
| 2                                              | 0.561        | 0.542 | 0.444    | 65 | 0.255    | 1.038 | 0.689    | 17 |

Table S5: Cross-validation results.

| Fold                                             | Training set |       |          |    | Test set |       |          |    |
|--------------------------------------------------|--------------|-------|----------|----|----------|-------|----------|----|
|                                                  | $R^2$        | RMSE  | $\Delta$ | N  | $Q^2$    | RMSE  | $\Delta$ | N  |
| 3                                                | 0.671        | 0.532 | 0.433    | 66 | 0.323    | 0.684 | 0.474    | 16 |
| 4                                                | 0.659        | 0.543 | 0.437    | 66 | 0.560    | 0.697 | 0.570    | 16 |
| 5                                                | 0.645        | 0.548 | 0.438    | 66 | 0.387    | 0.623 | 0.509    | 16 |
| QM B3LYP 6-31G*/MPA/FROG2 MM-OPT $R^2=0.792$     |              |       |          |    |          |       |          |    |
| 1                                                | 0.809        | 0.383 | 0.273    | 65 | 0.881    | 0.357 | 0.243    | 17 |
| 2                                                | 0.797        | 0.369 | 0.260    | 65 | 0.893    | 0.419 | 0.317    | 17 |
| 3                                                | 0.833        | 0.379 | 0.267    | 66 | 0.774    | 0.372 | 0.262    | 16 |
| 4                                                | 0.939        | 0.230 | 0.166    | 66 | 0.339    | 0.927 | 0.494    | 16 |
| 5                                                | 0.829        | 0.380 | 0.264    | 66 | 0.823    | 0.349 | 0.271    | 16 |
| QM B3LYP 6-31G*/MPA/FROG2 NO-OPT $R^2=0.814$     |              |       |          |    |          |       |          |    |
| 1                                                | 0.871        | 0.316 | 0.232    | 65 | 0.878    | 0.339 | 0.255    | 17 |
| 2                                                | 0.840        | 0.328 | 0.245    | 65 | 0.946    | 0.311 | 0.233    | 17 |
| 3                                                | 0.885        | 0.315 | 0.235    | 66 | 0.812    | 0.342 | 0.248    | 16 |
| 4                                                | 0.920        | 0.263 | 0.203    | 66 | 0.609    | 0.568 | 0.380    | 16 |
| 5                                                | 0.882        | 0.316 | 0.239    | 66 | 0.821    | 0.353 | 0.256    | 16 |
| QM B3LYP 6-31G*/MPA/FROG2 QM-OPT $R^2=0.827$     |              |       |          |    |          |       |          |    |
| 1                                                | 0.829        | 0.364 | 0.265    | 65 | 0.930    | 0.276 | 0.234    | 17 |
| 2                                                | 0.841        | 0.326 | 0.240    | 65 | 0.865    | 0.492 | 0.363    | 17 |
| 3                                                | 0.847        | 0.362 | 0.265    | 66 | 0.880    | 0.285 | 0.207    | 16 |
| 4                                                | 0.901        | 0.293 | 0.212    | 66 | 0.609    | 0.614 | 0.418    | 16 |
| 5                                                | 0.875        | 0.326 | 0.238    | 66 | 0.755    | 0.438 | 0.307    | 16 |
| QM B3LYP 6-31G*/MPA/NCI MM-OPT $R^2=0.851$       |              |       |          |    |          |       |          |    |
| 1                                                | 0.872        | 0.314 | 0.232    | 65 | 0.950    | 0.257 | 0.211    | 17 |
| 2                                                | 0.886        | 0.276 | 0.195    | 65 | 0.571    | 1.377 | 0.521    | 17 |
| 3                                                | 0.913        | 0.274 | 0.208    | 66 | 0.710    | 0.414 | 0.300    | 16 |
| 4                                                | 0.909        | 0.280 | 0.206    | 66 | 0.749    | 0.408 | 0.295    | 16 |
| 5                                                | 0.889        | 0.306 | 0.224    | 66 | 0.882    | 0.288 | 0.197    | 16 |
| QM B3LYP 6-31G*/MPA/NCI NO-OPT $R^2=0.870$       |              |       |          |    |          |       |          |    |
| 1                                                | 0.877        | 0.308 | 0.224    | 65 | 0.927    | 0.279 | 0.169    | 17 |
| 2                                                | 0.912        | 0.243 | 0.171    | 65 | 0.564    | 1.125 | 0.537    | 17 |
| 3                                                | 0.900        | 0.293 | 0.190    | 66 | 0.871    | 0.332 | 0.266    | 16 |
| 4                                                | 0.919        | 0.265 | 0.194    | 66 | 0.758    | 0.444 | 0.281    | 16 |
| 5                                                | 0.881        | 0.318 | 0.226    | 66 | 0.932    | 0.219 | 0.180    | 16 |
| QM B3LYP 6-31G*/MPA/NCI QM-OPT $R^2=0.819$       |              |       |          |    |          |       |          |    |
| 1                                                | 0.829        | 0.363 | 0.261    | 65 | 0.941    | 0.280 | 0.236    | 17 |
| 2                                                | 0.822        | 0.345 | 0.263    | 65 | 0.755    | 0.623 | 0.355    | 17 |
| 3                                                | 0.889        | 0.309 | 0.244    | 66 | 0.355    | 0.692 | 0.468    | 16 |
| 4                                                | 0.891        | 0.307 | 0.218    | 66 | 0.697    | 0.510 | 0.350    | 16 |
| 5                                                | 0.877        | 0.322 | 0.222    | 66 | 0.729    | 0.445 | 0.314    | 16 |
| QM B3LYP 6-31G*/MPA/OPENBABEL MM-OPT $R^2=0.638$ |              |       |          |    |          |       |          |    |
| 1                                                | 0.608        | 0.550 | 0.418    | 65 | 0.876    | 0.436 | 0.312    | 17 |
| 2                                                | 0.702        | 0.447 | 0.350    | 65 | 0.013    | 1.568 | 0.878    | 17 |
| 3                                                | 0.767        | 0.447 | 0.349    | 66 | 0.225    | 0.789 | 0.550    | 16 |
| 4                                                | 0.713        | 0.498 | 0.362    | 66 | 0.697    | 0.704 | 0.514    | 16 |
| 5                                                | 0.671        | 0.528 | 0.390    | 66 | 0.571    | 0.531 | 0.365    | 16 |
| QM B3LYP 6-31G*/MPA/OPENBABEL NO-OPT $R^2=0.634$ |              |       |          |    |          |       |          |    |
| 1                                                | 0.603        | 0.553 | 0.414    | 65 | 0.862    | 0.451 | 0.334    | 17 |
| 2                                                | 0.692        | 0.454 | 0.356    | 65 | 0.006    | 1.631 | 0.910    | 17 |
| 3                                                | 0.754        | 0.460 | 0.347    | 66 | 0.281    | 0.774 | 0.537    | 16 |
| 4                                                | 0.693        | 0.515 | 0.364    | 66 | 0.689    | 0.626 | 0.463    | 16 |
| 5                                                | 0.672        | 0.527 | 0.389    | 66 | 0.527    | 0.556 | 0.368    | 16 |
| QM B3LYP 6-31G*/MPA/OPENBABEL QM-OPT $R^2=0.607$ |              |       |          |    |          |       |          |    |
| 1                                                | 0.622        | 0.540 | 0.417    | 65 | 0.882    | 0.439 | 0.357    | 17 |
| 2                                                | 0.685        | 0.459 | 0.370    | 65 | 0.028    | 1.444 | 0.866    | 17 |
| 3                                                | 0.749        | 0.464 | 0.355    | 66 | 0.322    | 0.712 | 0.523    | 16 |
| 4                                                | 0.718        | 0.494 | 0.357    | 66 | 0.662    | 0.687 | 0.501    | 16 |
| 5                                                | 0.693        | 0.509 | 0.390    | 66 | 0.574    | 0.559 | 0.388    | 16 |
| QM B3LYP 6-31G*/MPA/PUBCHEM MM-OPT $R^2=0.846$   |              |       |          |    |          |       |          |    |
| 1                                                | 0.872        | 0.314 | 0.236    | 65 | 0.924    | 0.287 | 0.222    | 17 |

Table S5: Cross-validation results.

| Fold                                           | Training set |       |          |    | Test set |       |          |    |
|------------------------------------------------|--------------|-------|----------|----|----------|-------|----------|----|
|                                                | $R^2$        | RMSE  | $\Delta$ | N  | $Q^2$    | RMSE  | $\Delta$ | N  |
| 2                                              | 0.864        | 0.302 | 0.218    | 65 | 0.909    | 0.351 | 0.252    | 17 |
| 3                                              | 0.882        | 0.318 | 0.236    | 66 | 0.885    | 0.252 | 0.188    | 16 |
| 4                                              | 0.925        | 0.255 | 0.198    | 66 | 0.634    | 0.506 | 0.350    | 16 |
| 5                                              | 0.890        | 0.305 | 0.220    | 66 | 0.866    | 0.328 | 0.263    | 16 |
| QM B3LYP 6-31G*/MPA/PUBCHEM NO-OPT $R^2=0.831$ |              |       |          |    |          |       |          |    |
| 1                                              | 0.870        | 0.317 | 0.241    | 65 | 0.868    | 0.358 | 0.269    | 17 |
| 2                                              | 0.848        | 0.319 | 0.249    | 65 | 0.884    | 0.439 | 0.258    | 17 |
| 3                                              | 0.893        | 0.303 | 0.221    | 66 | 0.751    | 0.432 | 0.319    | 16 |
| 4                                              | 0.907        | 0.284 | 0.218    | 66 | 0.699    | 0.486 | 0.339    | 16 |
| 5                                              | 0.871        | 0.330 | 0.232    | 66 | 0.877    | 0.327 | 0.282    | 16 |
| QM B3LYP 6-31G*/MPA/PUBCHEM QM-OPT $R^2=0.859$ |              |       |          |    |          |       |          |    |
| 1                                              | 0.854        | 0.335 | 0.238    | 65 | 0.916    | 0.291 | 0.251    | 17 |
| 2                                              | 0.866        | 0.299 | 0.226    | 65 | 0.886    | 0.478 | 0.332    | 17 |
| 3                                              | 0.871        | 0.333 | 0.245    | 66 | 0.850    | 0.298 | 0.199    | 16 |
| 4                                              | 0.916        | 0.269 | 0.209    | 66 | 0.686    | 0.539 | 0.337    | 16 |
| 5                                              | 0.868        | 0.334 | 0.240    | 66 | 0.901    | 0.297 | 0.234    | 16 |
| QM B3LYP 6-31G*/MPA/RDKIT MM-OPT $R^2=0.756$   |              |       |          |    |          |       |          |    |
| 1                                              | 0.790        | 0.403 | 0.309    | 65 | 0.927    | 0.284 | 0.232    | 17 |
| 2                                              | 0.812        | 0.354 | 0.285    | 65 | 0.742    | 0.618 | 0.486    | 17 |
| 3                                              | 0.873        | 0.330 | 0.237    | 66 | 0.499    | 0.616 | 0.483    | 16 |
| 4                                              | 0.865        | 0.342 | 0.271    | 66 | 0.570    | 0.602 | 0.409    | 16 |
| 5                                              | 0.812        | 0.398 | 0.308    | 66 | 0.868    | 0.360 | 0.299    | 16 |
| QM B3LYP 6-31G*/MPA/RDKIT QM-OPT $R^2=0.619$   |              |       |          |    |          |       |          |    |
| 1                                              | 0.650        | 0.519 | 0.389    | 65 | 0.876    | 0.424 | 0.331    | 17 |
| 2                                              | 0.648        | 0.485 | 0.353    | 65 | 0.387    | 0.926 | 0.510    | 17 |
| 3                                              | 0.825        | 0.388 | 0.283    | 66 | 0.131    | 0.877 | 0.635    | 16 |
| 4                                              | 0.698        | 0.511 | 0.371    | 66 | 0.658    | 0.449 | 0.375    | 16 |
| 5                                              | 0.706        | 0.498 | 0.377    | 66 | 0.633    | 0.523 | 0.339    | 16 |
| QM B3LYP 6-31G*/MPA/RDKIT MM-OPT $R^2=0.679$   |              |       |          |    |          |       |          |    |
| 1                                              | 0.742        | 0.446 | 0.347    | 65 | 0.782    | 0.484 | 0.386    | 17 |
| 2                                              | 0.732        | 0.424 | 0.332    | 65 | 0.285    | 1.103 | 0.586    | 17 |
| 3                                              | 0.779        | 0.436 | 0.363    | 66 | 0.596    | 0.516 | 0.332    | 16 |
| 4                                              | 0.797        | 0.419 | 0.313    | 66 | 0.420    | 0.590 | 0.526    | 16 |
| 5                                              | 0.746        | 0.463 | 0.357    | 66 | 0.753    | 0.394 | 0.327    | 16 |
| QM B3LYP 6-31G*/MPA/RDKIT NO-OPT $R^2=0.624$   |              |       |          |    |          |       |          |    |
| 1                                              | 0.712        | 0.471 | 0.369    | 65 | 0.851    | 0.503 | 0.436    | 17 |
| 2                                              | 0.666        | 0.473 | 0.377    | 65 | 0.694    | 0.661 | 0.447    | 17 |
| 3                                              | 0.717        | 0.493 | 0.385    | 66 | 0.849    | 0.415 | 0.338    | 16 |
| 4                                              | 0.808        | 0.407 | 0.341    | 66 | 0.342    | 0.736 | 0.563    | 16 |
| 5                                              | 0.747        | 0.463 | 0.362    | 66 | 0.490    | 0.568 | 0.446    | 16 |
| QM B3LYP 6-31G*/NPA/BALLOON MM-OPT $R^2=0.693$ |              |       |          |    |          |       |          |    |
| 1                                              | 0.776        | 0.415 | 0.314    | 65 | 0.886    | 0.336 | 0.278    | 17 |
| 2                                              | 0.734        | 0.422 | 0.312    | 65 | 0.894    | 0.386 | 0.279    | 17 |
| 3                                              | 0.851        | 0.358 | 0.263    | 66 | 0.475    | 0.552 | 0.426    | 16 |
| 4                                              | 0.847        | 0.363 | 0.286    | 66 | 0.604    | 0.533 | 0.386    | 16 |
| 5                                              | 0.810        | 0.401 | 0.305    | 66 | 0.790    | 0.400 | 0.294    | 16 |
| QM B3LYP 6-31G*/NPA/BALLOON NO-OPT $R^2=0.717$ |              |       |          |    |          |       |          |    |
| 1                                              | 0.803        | 0.390 | 0.291    | 65 | 0.902    | 0.402 | 0.307    | 17 |
| 2                                              | 0.752        | 0.407 | 0.300    | 65 | 0.946    | 0.281 | 0.224    | 17 |
| 3                                              | 0.857        | 0.351 | 0.258    | 66 | 0.610    | 0.509 | 0.377    | 16 |
| 4                                              | 0.852        | 0.358 | 0.264    | 66 | 0.700    | 0.501 | 0.327    | 16 |
| 5                                              | 0.840        | 0.368 | 0.267    | 66 | 0.695    | 0.455 | 0.337    | 16 |
| QM B3LYP 6-31G*/NPA/BALLOON QM-OPT $R^2=0.733$ |              |       |          |    |          |       |          |    |
| 1                                              | 0.796        | 0.397 | 0.296    | 65 | 0.913    | 0.306 | 0.250    | 17 |
| 2                                              | 0.769        | 0.394 | 0.294    | 65 | 0.714    | 0.623 | 0.358    | 17 |
| 3                                              | 0.877        | 0.325 | 0.246    | 66 | 0.456    | 0.540 | 0.436    | 16 |
| 4                                              | 0.844        | 0.367 | 0.273    | 66 | 0.732    | 0.462 | 0.281    | 16 |
| 5                                              | 0.830        | 0.379 | 0.284    | 66 | 0.779    | 0.379 | 0.273    | 16 |
| QM B3LYP 6-31G*/NPA/FROG2 MM-OPT $R^2=0.881$   |              |       |          |    |          |       |          |    |

Table S5: Cross-validation results.

| Fold                                             | Training set |       |          |    | Test set |       |          |    |
|--------------------------------------------------|--------------|-------|----------|----|----------|-------|----------|----|
|                                                  | $R^2$        | RMSE  | $\Delta$ | N  | $Q^2$    | RMSE  | $\Delta$ | N  |
| 1                                                | 0.887        | 0.296 | 0.220    | 65 | 0.949    | 0.228 | 0.151    | 17 |
| 2                                                | 0.894        | 0.266 | 0.185    | 65 | 0.900    | 0.375 | 0.237    | 17 |
| 3                                                | 0.907        | 0.283 | 0.213    | 66 | 0.851    | 0.282 | 0.214    | 16 |
| 4                                                | 0.955        | 0.198 | 0.151    | 66 | 0.473    | 0.738 | 0.439    | 16 |
| 5                                                | 0.902        | 0.288 | 0.207    | 66 | 0.878    | 0.298 | 0.213    | 16 |
| QM B3LYP 6-31G*/NPA/FROG2 NO-OPT $R^2=0.819$     |              |       |          |    |          |       |          |    |
| 1                                                | 0.880        | 0.305 | 0.233    | 65 | 0.851    | 0.381 | 0.298    | 17 |
| 2                                                | 0.860        | 0.306 | 0.231    | 65 | 0.910    | 0.382 | 0.280    | 17 |
| 3                                                | 0.881        | 0.319 | 0.243    | 66 | 0.853    | 0.321 | 0.262    | 16 |
| 4                                                | 0.892        | 0.306 | 0.234    | 66 | 0.739    | 0.408 | 0.289    | 16 |
| 5                                                | 0.882        | 0.316 | 0.243    | 66 | 0.817    | 0.341 | 0.258    | 16 |
| QM B3LYP 6-31G*/NPA/FROG2 QM-OPT $R^2=0.886$     |              |       |          |    |          |       |          |    |
| 1                                                | 0.888        | 0.294 | 0.217    | 65 | 0.961    | 0.200 | 0.178    | 17 |
| 2                                                | 0.905        | 0.252 | 0.195    | 65 | 0.904    | 0.426 | 0.296    | 17 |
| 3                                                | 0.902        | 0.290 | 0.214    | 66 | 0.919    | 0.228 | 0.194    | 16 |
| 4                                                | 0.949        | 0.209 | 0.161    | 66 | 0.697    | 0.507 | 0.372    | 16 |
| 5                                                | 0.900        | 0.291 | 0.211    | 66 | 0.919    | 0.236 | 0.176    | 16 |
| QM B3LYP 6-31G*/NPA/NCI MM-OPT $R^2=0.911$       |              |       |          |    |          |       |          |    |
| 1                                                | 0.916        | 0.254 | 0.186    | 65 | 0.967    | 0.180 | 0.131    | 17 |
| 2                                                | 0.934        | 0.210 | 0.152    | 65 | 0.704    | 1.146 | 0.490    | 17 |
| 3                                                | 0.940        | 0.228 | 0.162    | 66 | 0.846    | 0.318 | 0.273    | 16 |
| 4                                                | 0.950        | 0.209 | 0.156    | 66 | 0.795    | 0.364 | 0.255    | 16 |
| 5                                                | 0.925        | 0.251 | 0.178    | 66 | 0.935    | 0.209 | 0.148    | 16 |
| QM B3LYP 6-31G*/NPA/NCI NO-OPT $R^2=0.857$       |              |       |          |    |          |       |          |    |
| 1                                                | 0.895        | 0.284 | 0.205    | 65 | 0.958    | 0.199 | 0.127    | 17 |
| 2                                                | 0.890        | 0.272 | 0.195    | 65 | 0.932    | 0.302 | 0.212    | 17 |
| 3                                                | 0.930        | 0.245 | 0.172    | 66 | 0.874    | 0.379 | 0.324    | 16 |
| 4                                                | 0.941        | 0.226 | 0.165    | 66 | 0.785    | 0.455 | 0.302    | 16 |
| 5                                                | 0.904        | 0.285 | 0.204    | 66 | 0.933    | 0.206 | 0.159    | 16 |
| QM B3LYP 6-31G*/NPA/NCI QM-OPT $R^2=0.852$       |              |       |          |    |          |       |          |    |
| 1                                                | 0.888        | 0.294 | 0.212    | 65 | 0.945    | 0.228 | 0.174    | 17 |
| 2                                                | 0.879        | 0.284 | 0.212    | 65 | 0.855    | 0.488 | 0.280    | 17 |
| 3                                                | 0.909        | 0.280 | 0.207    | 66 | 0.765    | 0.352 | 0.274    | 16 |
| 4                                                | 0.947        | 0.213 | 0.166    | 66 | 0.713    | 0.502 | 0.337    | 16 |
| 5                                                | 0.900        | 0.291 | 0.203    | 66 | 0.916    | 0.236 | 0.183    | 16 |
| QM B3LYP 6-31G*/NPA/OPENBABEL MM-OPT $R^2=0.771$ |              |       |          |    |          |       |          |    |
| 1                                                | 0.811        | 0.382 | 0.296    | 65 | 0.939    | 0.258 | 0.194    | 17 |
| 2                                                | 0.819        | 0.348 | 0.273    | 65 | 0.783    | 0.631 | 0.444    | 17 |
| 3                                                | 0.884        | 0.316 | 0.250    | 66 | 0.609    | 0.524 | 0.444    | 16 |
| 4                                                | 0.865        | 0.342 | 0.262    | 66 | 0.826    | 0.450 | 0.346    | 16 |
| 5                                                | 0.849        | 0.358 | 0.278    | 66 | 0.820    | 0.382 | 0.262    | 16 |
| QM B3LYP 6-31G*/NPA/OPENBABEL NO-OPT $R^2=0.771$ |              |       |          |    |          |       |          |    |
| 1                                                | 0.818        | 0.375 | 0.290    | 65 | 0.928    | 0.264 | 0.197    | 17 |
| 2                                                | 0.825        | 0.343 | 0.268    | 65 | 0.785    | 0.606 | 0.426    | 17 |
| 3                                                | 0.889        | 0.309 | 0.246    | 66 | 0.609    | 0.526 | 0.450    | 16 |
| 4                                                | 0.863        | 0.344 | 0.262    | 66 | 0.850    | 0.421 | 0.312    | 16 |
| 5                                                | 0.852        | 0.354 | 0.271    | 66 | 0.816    | 0.375 | 0.267    | 16 |
| QM B3LYP 6-31G*/NPA/OPENBABEL QM-OPT $R^2=0.730$ |              |       |          |    |          |       |          |    |
| 1                                                | 0.765        | 0.426 | 0.334    | 65 | 0.906    | 0.311 | 0.267    | 17 |
| 2                                                | 0.782        | 0.382 | 0.306    | 65 | 0.543    | 0.811 | 0.518    | 17 |
| 3                                                | 0.843        | 0.368 | 0.272    | 66 | 0.623    | 0.532 | 0.472    | 16 |
| 4                                                | 0.849        | 0.361 | 0.290    | 66 | 0.780    | 0.590 | 0.457    | 16 |
| 5                                                | 0.821        | 0.389 | 0.314    | 66 | 0.703    | 0.491 | 0.317    | 16 |
| QM B3LYP 6-31G*/NPA/PUBCHEM MM-OPT $R^2=0.849$   |              |       |          |    |          |       |          |    |
| 1                                                | 0.874        | 0.312 | 0.225    | 65 | 0.951    | 0.231 | 0.186    | 17 |
| 2                                                | 0.878        | 0.286 | 0.212    | 65 | 0.907    | 0.385 | 0.261    | 17 |
| 3                                                | 0.896        | 0.299 | 0.210    | 66 | 0.856    | 0.296 | 0.222    | 16 |
| 4                                                | 0.936        | 0.235 | 0.176    | 66 | 0.643    | 0.499 | 0.336    | 16 |
| 5                                                | 0.888        | 0.308 | 0.220    | 66 | 0.898    | 0.278 | 0.214    | 16 |

Table S5: Cross-validation results.

| Fold                                           | Training set |       |          |    | Test set |       |          |    |
|------------------------------------------------|--------------|-------|----------|----|----------|-------|----------|----|
|                                                | $R^2$        | RMSE  | $\Delta$ | N  | $Q^2$    | RMSE  | $\Delta$ | N  |
| QM B3LYP 6-31G*/NPA/PUBCHEM NO-OPT $R^2=0.872$ |              |       |          |    |          |       |          |    |
| 1                                              | 0.876        | 0.309 | 0.220    | 65 | 0.928    | 0.263 | 0.198    | 17 |
| 2                                              | 0.887        | 0.275 | 0.197    | 65 | 0.863    | 0.450 | 0.276    | 17 |
| 3                                              | 0.906        | 0.284 | 0.206    | 66 | 0.654    | 0.505 | 0.356    | 16 |
| 4                                              | 0.927        | 0.251 | 0.174    | 66 | 0.745    | 0.473 | 0.316    | 16 |
| 5                                              | 0.889        | 0.306 | 0.220    | 66 | 0.887    | 0.315 | 0.222    | 16 |
| QM B3LYP 6-31G*/NPA/PUBCHEM QM-OPT $R^2=0.864$ |              |       |          |    |          |       |          |    |
| 1                                              | 0.875        | 0.311 | 0.217    | 65 | 0.963    | 0.206 | 0.188    | 17 |
| 2                                              | 0.886        | 0.276 | 0.203    | 65 | 0.912    | 0.384 | 0.272    | 17 |
| 3                                              | 0.898        | 0.297 | 0.209    | 66 | 0.845    | 0.327 | 0.232    | 16 |
| 4                                              | 0.943        | 0.221 | 0.169    | 66 | 0.701    | 0.515 | 0.328    | 16 |
| 5                                              | 0.891        | 0.304 | 0.213    | 66 | 0.915    | 0.240 | 0.181    | 16 |
| QM B3LYP 6-31G*/NPA/RDKIT MM-OPT $R^2=0.768$   |              |       |          |    |          |       |          |    |
| 1                                              | 0.810        | 0.382 | 0.277    | 65 | 0.940    | 0.238 | 0.212    | 17 |
| 2                                              | 0.798        | 0.368 | 0.279    | 65 | 0.902    | 0.370 | 0.277    | 17 |
| 3                                              | 0.867        | 0.338 | 0.248    | 66 | 0.655    | 0.476 | 0.357    | 16 |
| 4                                              | 0.906        | 0.284 | 0.213    | 66 | 0.589    | 0.650 | 0.378    | 16 |
| 5                                              | 0.877        | 0.323 | 0.240    | 66 | 0.352    | 0.743 | 0.459    | 16 |
| QM B3LYP 6-31G*/NPA/RDKIT QM-OPT $R^2=0.745$   |              |       |          |    |          |       |          |    |
| 1                                              | 0.772        | 0.419 | 0.315    | 65 | 0.966    | 0.253 | 0.198    | 17 |
| 2                                              | 0.783        | 0.382 | 0.282    | 65 | 0.778    | 0.580 | 0.368    | 17 |
| 3                                              | 0.873        | 0.330 | 0.226    | 66 | 0.605    | 0.605 | 0.512    | 16 |
| 4                                              | 0.843        | 0.368 | 0.284    | 66 | 0.626    | 0.522 | 0.360    | 16 |
| 5                                              | 0.829        | 0.380 | 0.285    | 66 | 0.565    | 0.565 | 0.258    | 16 |
| QM B3LYP 6-31G*/NPA/RDKIT MM-OPT $R^2=0.677$   |              |       |          |    |          |       |          |    |
| 1                                              | 0.763        | 0.428 | 0.329    | 65 | 0.916    | 0.334 | 0.301    | 17 |
| 2                                              | 0.746        | 0.412 | 0.304    | 65 | 0.689    | 0.670 | 0.414    | 17 |
| 3                                              | 0.816        | 0.398 | 0.289    | 66 | 0.792    | 0.495 | 0.411    | 16 |
| 4                                              | 0.879        | 0.324 | 0.263    | 66 | 0.461    | 0.669 | 0.522    | 16 |
| 5                                              | 0.798        | 0.413 | 0.319    | 66 | 0.779    | 0.429 | 0.340    | 16 |
| QM B3LYP 6-31G*/NPA/RDKIT NO-OPT $R^2=0.728$   |              |       |          |    |          |       |          |    |
| 1                                              | 0.797        | 0.396 | 0.283    | 65 | 0.857    | 0.474 | 0.407    | 17 |
| 2                                              | 0.781        | 0.383 | 0.285    | 65 | 0.551    | 0.821 | 0.543    | 17 |
| 3                                              | 0.789        | 0.426 | 0.317    | 66 | 0.880    | 0.306 | 0.245    | 16 |
| 4                                              | 0.888        | 0.311 | 0.258    | 66 | 0.421    | 0.678 | 0.470    | 16 |
| 5                                              | 0.816        | 0.395 | 0.288    | 66 | 0.750    | 0.443 | 0.354    | 16 |
| QM HF STO-3G/MPA/BALLOON MM-OPT $R^2=0.809$    |              |       |          |    |          |       |          |    |
| 1                                              | 0.839        | 0.353 | 0.244    | 65 | 0.969    | 0.223 | 0.181    | 17 |
| 2                                              | 0.835        | 0.332 | 0.243    | 65 | 0.307    | 1.337 | 0.481    | 17 |
| 3                                              | 0.921        | 0.261 | 0.192    | 66 | 0.426    | 0.560 | 0.392    | 16 |
| 4                                              | 0.890        | 0.308 | 0.217    | 66 | 0.691    | 0.436 | 0.346    | 16 |
| 5                                              | 0.870        | 0.331 | 0.234    | 66 | 0.852    | 0.318 | 0.205    | 16 |
| QM HF STO-3G/MPA/BALLOON NO-OPT $R^2=0.782$    |              |       |          |    |          |       |          |    |
| 1                                              | 0.805        | 0.388 | 0.285    | 65 | 0.904    | 0.376 | 0.312    | 17 |
| 2                                              | 0.813        | 0.354 | 0.265    | 65 | 0.048    | 2.500 | 0.807    | 17 |
| 3                                              | 0.872        | 0.332 | 0.266    | 66 | 0.515    | 0.557 | 0.402    | 16 |
| 4                                              | 0.848        | 0.363 | 0.267    | 66 | 0.655    | 0.469 | 0.391    | 16 |
| 5                                              | 0.839        | 0.369 | 0.290    | 66 | 0.708    | 0.431 | 0.326    | 16 |
| QM HF STO-3G/MPA/BALLOON QM-OPT $R^2=0.842$    |              |       |          |    |          |       |          |    |
| 1                                              | 0.868        | 0.319 | 0.252    | 65 | 0.962    | 0.210 | 0.186    | 17 |
| 2                                              | 0.861        | 0.305 | 0.239    | 65 | 0.562    | 0.820 | 0.387    | 17 |
| 3                                              | 0.918        | 0.266 | 0.202    | 66 | 0.702    | 0.431 | 0.313    | 16 |
| 4                                              | 0.901        | 0.293 | 0.229    | 66 | 0.853    | 0.330 | 0.265    | 16 |
| 5                                              | 0.914        | 0.269 | 0.206    | 66 | 0.777    | 0.455 | 0.341    | 16 |
| QM HF STO-3G/MPA/FROG2 MM-OPT $R^2=0.896$      |              |       |          |    |          |       |          |    |
| 1                                              | 0.889        | 0.292 | 0.216    | 65 | 0.962    | 0.228 | 0.144    | 17 |
| 2                                              | 0.908        | 0.248 | 0.176    | 65 | 0.887    | 0.487 | 0.330    | 17 |
| 3                                              | 0.919        | 0.264 | 0.190    | 66 | 0.864    | 0.368 | 0.284    | 16 |
| 4                                              | 0.944        | 0.221 | 0.170    | 66 | 0.545    | 0.671 | 0.378    | 16 |

Table S5: Cross-validation results.

| Fold                                          | Training set |       |          |    | Test set |       |          |    |
|-----------------------------------------------|--------------|-------|----------|----|----------|-------|----------|----|
|                                               | $R^2$        | RMSE  | $\Delta$ | N  | $Q^2$    | RMSE  | $\Delta$ | N  |
| 5                                             | 0.913        | 0.271 | 0.198    | 66 | 0.871    | 0.315 | 0.221    | 16 |
| QM HF STO-3G/MPA/FROG2 NO-OPT $R^2=0.865$     |              |       |          |    |          |       |          |    |
| 1                                             | 0.877        | 0.308 | 0.218    | 65 | 0.953    | 0.211 | 0.158    | 17 |
| 2                                             | 0.893        | 0.268 | 0.194    | 65 | 0.865    | 0.445 | 0.271    | 17 |
| 3                                             | 0.912        | 0.274 | 0.189    | 66 | 0.815    | 0.380 | 0.301    | 16 |
| 4                                             | 0.916        | 0.270 | 0.202    | 66 | 0.727    | 0.443 | 0.275    | 16 |
| 5                                             | 0.903        | 0.286 | 0.203    | 66 | 0.837    | 0.328 | 0.227    | 16 |
| QM HF STO-3G/MPA/FROG2 QM-OPT $R^2=0.921$     |              |       |          |    |          |       |          |    |
| 1                                             | 0.897        | 0.282 | 0.205    | 65 | 0.978    | 0.145 | 0.127    | 17 |
| 2                                             | 0.948        | 0.187 | 0.140    | 65 | 0.746    | 0.597 | 0.385    | 17 |
| 3                                             | 0.919        | 0.263 | 0.194    | 66 | 0.911    | 0.267 | 0.196    | 16 |
| 4                                             | 0.948        | 0.212 | 0.159    | 66 | 0.754    | 0.454 | 0.321    | 16 |
| 5                                             | 0.910        | 0.276 | 0.195    | 66 | 0.951    | 0.186 | 0.170    | 16 |
| QM HF STO-3G/MPA/NCI MM-OPT $R^2=0.919$       |              |       |          |    |          |       |          |    |
| 1                                             | 0.924        | 0.242 | 0.180    | 65 | 0.981    | 0.145 | 0.126    | 17 |
| 2                                             | 0.938        | 0.203 | 0.151    | 65 | 0.438    | 2.635 | 0.865    | 17 |
| 3                                             | 0.953        | 0.202 | 0.149    | 66 | 0.801    | 0.358 | 0.288    | 16 |
| 4                                             | 0.946        | 0.217 | 0.155    | 66 | 0.894    | 0.272 | 0.212    | 16 |
| 5                                             | 0.948        | 0.209 | 0.160    | 66 | 0.876    | 0.286 | 0.199    | 16 |
| QM HF STO-3G/MPA/NCI NO-OPT $R^2=0.895$       |              |       |          |    |          |       |          |    |
| 1                                             | 0.917        | 0.254 | 0.184    | 65 | 0.979    | 0.159 | 0.124    | 17 |
| 2                                             | 0.924        | 0.225 | 0.158    | 65 | 0.767    | 0.567 | 0.323    | 17 |
| 3                                             | 0.943        | 0.222 | 0.158    | 66 | 0.913    | 0.314 | 0.261    | 16 |
| 4                                             | 0.948        | 0.212 | 0.155    | 66 | 0.876    | 0.338 | 0.240    | 16 |
| 5                                             | 0.931        | 0.242 | 0.174    | 66 | 0.916    | 0.235 | 0.165    | 16 |
| QM HF STO-3G/MPA/NCI QM-OPT $R^2=0.889$       |              |       |          |    |          |       |          |    |
| 1                                             | 0.917        | 0.253 | 0.187    | 65 | 0.938    | 0.242 | 0.159    | 17 |
| 2                                             | 0.902        | 0.256 | 0.191    | 65 | 0.963    | 0.251 | 0.204    | 17 |
| 3                                             | 0.932        | 0.242 | 0.179    | 66 | 0.838    | 0.306 | 0.252    | 16 |
| 4                                             | 0.947        | 0.214 | 0.160    | 66 | 0.833    | 0.376 | 0.274    | 16 |
| 5                                             | 0.933        | 0.238 | 0.170    | 66 | 0.869    | 0.299 | 0.214    | 16 |
| QM HF STO-3G/MPA/OPENBABEL MM-OPT $R^2=0.833$ |              |       |          |    |          |       |          |    |
| 1                                             | 0.832        | 0.360 | 0.270    | 65 | 0.968    | 0.199 | 0.169    | 17 |
| 2                                             | 0.865        | 0.300 | 0.218    | 65 | 0.063    | 1.879 | 0.723    | 17 |
| 3                                             | 0.903        | 0.289 | 0.211    | 66 | 0.608    | 0.479 | 0.386    | 16 |
| 4                                             | 0.881        | 0.320 | 0.233    | 66 | 0.706    | 0.401 | 0.315    | 16 |
| 5                                             | 0.870        | 0.332 | 0.260    | 66 | 0.828    | 0.348 | 0.219    | 16 |
| QM HF STO-3G/MPA/OPENBABEL NO-OPT $R^2=0.832$ |              |       |          |    |          |       |          |    |
| 1                                             | 0.839        | 0.353 | 0.262    | 65 | 0.969    | 0.190 | 0.161    | 17 |
| 2                                             | 0.867        | 0.298 | 0.215    | 65 | 0.147    | 1.579 | 0.631    | 17 |
| 3                                             | 0.911        | 0.276 | 0.199    | 66 | 0.614    | 0.487 | 0.382    | 16 |
| 4                                             | 0.883        | 0.318 | 0.233    | 66 | 0.772    | 0.372 | 0.274    | 16 |
| 5                                             | 0.875        | 0.325 | 0.254    | 66 | 0.836    | 0.336 | 0.206    | 16 |
| QM HF STO-3G/MPA/OPENBABEL QM-OPT $R^2=0.835$ |              |       |          |    |          |       |          |    |
| 1                                             | 0.815        | 0.378 | 0.290    | 65 | 0.950    | 0.255 | 0.225    | 17 |
| 2                                             | 0.865        | 0.301 | 0.230    | 65 | 0.006    | 2.495 | 0.866    | 17 |
| 3                                             | 0.866        | 0.339 | 0.249    | 66 | 0.739    | 0.440 | 0.380    | 16 |
| 4                                             | 0.860        | 0.348 | 0.262    | 66 | 0.768    | 0.388 | 0.330    | 16 |
| 5                                             | 0.880        | 0.318 | 0.261    | 66 | 0.659    | 0.481 | 0.340    | 16 |
| QM HF STO-3G/MPA/PUBCHEM MM-OPT $R^2=0.894$   |              |       |          |    |          |       |          |    |
| 1                                             | 0.904        | 0.273 | 0.203    | 65 | 0.955    | 0.238 | 0.160    | 17 |
| 2                                             | 0.911        | 0.244 | 0.164    | 65 | 0.917    | 0.434 | 0.282    | 17 |
| 3                                             | 0.923        | 0.257 | 0.177    | 66 | 0.906    | 0.314 | 0.244    | 16 |
| 4                                             | 0.943        | 0.223 | 0.169    | 66 | 0.743    | 0.426 | 0.271    | 16 |
| 5                                             | 0.920        | 0.260 | 0.179    | 66 | 0.891    | 0.296 | 0.193    | 16 |
| QM HF STO-3G/MPA/PUBCHEM NO-OPT $R^2=0.925$   |              |       |          |    |          |       |          |    |
| 1                                             | 0.896        | 0.283 | 0.195    | 65 | 0.958    | 0.233 | 0.178    | 17 |
| 2                                             | 0.932        | 0.214 | 0.165    | 65 | 0.865    | 0.503 | 0.268    | 17 |
| 3                                             | 0.919        | 0.264 | 0.188    | 66 | 0.819    | 0.392 | 0.292    | 16 |

Table S5: Cross-validation results.

| Fold                                                    | Training set |       |          |    | Test set |       |          |    |
|---------------------------------------------------------|--------------|-------|----------|----|----------|-------|----------|----|
|                                                         | $R^2$        | RMSE  | $\Delta$ | N  | $Q^2$    | RMSE  | $\Delta$ | N  |
| 4                                                       | 0.925        | 0.254 | 0.171    | 66 | 0.810    | 0.370 | 0.270    | 16 |
| 5                                                       | 0.901        | 0.289 | 0.204    | 66 | 0.947    | 0.185 | 0.139    | 16 |
| QM HF STO-3G/MPA/PUBCHEM QM-OPT $R^2=0.888$             |              |       |          |    |          |       |          |    |
| 1                                                       | 0.879        | 0.306 | 0.210    | 65 | 0.970    | 0.172 | 0.151    | 17 |
| 2                                                       | 0.900        | 0.259 | 0.189    | 65 | 0.880    | 0.452 | 0.299    | 17 |
| 3                                                       | 0.905        | 0.286 | 0.195    | 66 | 0.876    | 0.327 | 0.226    | 16 |
| 4                                                       | 0.940        | 0.228 | 0.166    | 66 | 0.749    | 0.482 | 0.303    | 16 |
| 5                                                       | 0.902        | 0.287 | 0.196    | 66 | 0.874    | 0.286 | 0.216    | 16 |
| QM HF STO-3G/MPA/RDKIT MM-OPT $R^2=0.858$               |              |       |          |    |          |       |          |    |
| 1                                                       | 0.877        | 0.309 | 0.229    | 65 | 0.947    | 0.225 | 0.165    | 17 |
| 2                                                       | 0.883        | 0.280 | 0.210    | 65 | 0.036    | 2.296 | 0.762    | 17 |
| 3                                                       | 0.918        | 0.265 | 0.188    | 66 | 0.790    | 0.441 | 0.346    | 16 |
| 4                                                       | 0.929        | 0.247 | 0.193    | 66 | 0.698    | 0.470 | 0.316    | 16 |
| 5                                                       | 0.902        | 0.288 | 0.211    | 66 | 0.727    | 0.424 | 0.269    | 16 |
| QM HF STO-3G/MPA/RDKIT QM-OPT $R^2=0.845$               |              |       |          |    |          |       |          |    |
| 1                                                       | 0.830        | 0.363 | 0.275    | 65 | 0.971    | 0.227 | 0.199    | 17 |
| 2                                                       | 0.871        | 0.294 | 0.209    | 65 | 0.025    | 2.314 | 0.786    | 17 |
| 3                                                       | 0.906        | 0.285 | 0.200    | 66 | 0.716    | 0.551 | 0.450    | 16 |
| 4                                                       | 0.863        | 0.344 | 0.258    | 66 | 0.816    | 0.318 | 0.242    | 16 |
| 5                                                       | 0.902        | 0.288 | 0.212    | 66 | 0.704    | 0.581 | 0.389    | 16 |
| QM HF STO-3G/MPA/RDKIT MM-OPT $R^2=0.865$               |              |       |          |    |          |       |          |    |
| 1                                                       | 0.890        | 0.291 | 0.218    | 65 | 0.956    | 0.279 | 0.226    | 17 |
| 2                                                       | 0.878        | 0.286 | 0.202    | 65 | 0.477    | 0.986 | 0.415    | 17 |
| 3                                                       | 0.922        | 0.260 | 0.204    | 66 | 0.717    | 0.476 | 0.342    | 16 |
| 4                                                       | 0.940        | 0.227 | 0.174    | 66 | 0.645    | 0.504 | 0.397    | 16 |
| 5                                                       | 0.910        | 0.276 | 0.219    | 66 | 0.781    | 0.628 | 0.354    | 16 |
| QM HF STO-3G/MPA/RDKIT NO-OPT $R^2=0.812$               |              |       |          |    |          |       |          |    |
| 1                                                       | 0.774        | 0.417 | 0.317    | 65 | 0.834    | 0.478 | 0.434    | 17 |
| 2                                                       | 0.863        | 0.303 | 0.233    | 65 | 0.056    | 2.050 | 0.834    | 17 |
| 3                                                       | 0.780        | 0.435 | 0.344    | 66 | 0.724    | 0.394 | 0.260    | 16 |
| 4                                                       | 0.807        | 0.409 | 0.320    | 66 | 0.531    | 0.488 | 0.387    | 16 |
| 5                                                       | 0.801        | 0.410 | 0.323    | 66 | 0.643    | 0.476 | 0.365    | 16 |
| Svob2007-chal2 HF STO-3G/MPA/BALLOON MM-OPT $R^2=0.711$ |              |       |          |    |          |       |          |    |
| 1                                                       | 0.784        | 0.409 | 0.339    | 65 | 0.820    | 0.408 | 0.352    | 17 |
| 2                                                       | 0.736        | 0.420 | 0.360    | 65 | 0.927    | 0.333 | 0.260    | 17 |
| 3                                                       | 0.846        | 0.364 | 0.291    | 66 | 0.495    | 0.553 | 0.488    | 16 |
| 4                                                       | 0.807        | 0.408 | 0.335    | 66 | 0.718    | 0.396 | 0.378    | 16 |
| 5                                                       | 0.831        | 0.378 | 0.320    | 66 | 0.656    | 0.503 | 0.412    | 16 |
| Svob2007-chal2 HF STO-3G/MPA/BALLOON NO-OPT $R^2=0.762$ |              |       |          |    |          |       |          |    |
| 1                                                       | 0.819        | 0.374 | 0.300    | 65 | 0.839    | 0.387 | 0.312    | 17 |
| 2                                                       | 0.795        | 0.370 | 0.296    | 65 | 0.888    | 0.390 | 0.296    | 17 |
| 3                                                       | 0.856        | 0.351 | 0.275    | 66 | 0.662    | 0.454 | 0.400    | 16 |
| 4                                                       | 0.830        | 0.383 | 0.304    | 66 | 0.805    | 0.310 | 0.279    | 16 |
| 5                                                       | 0.867        | 0.335 | 0.276    | 66 | 0.671    | 0.520 | 0.375    | 16 |
| Svob2007-chal2 HF STO-3G/MPA/BALLOON QM-OPT $R^2=0.679$ |              |       |          |    |          |       |          |    |
| 1                                                       | 0.738        | 0.450 | 0.365    | 65 | 0.848    | 0.375 | 0.321    | 17 |
| 2                                                       | 0.729        | 0.426 | 0.347    | 65 | 0.843    | 0.479 | 0.362    | 17 |
| 3                                                       | 0.825        | 0.388 | 0.310    | 66 | 0.508    | 0.601 | 0.506    | 16 |
| 4                                                       | 0.771        | 0.444 | 0.357    | 66 | 0.742    | 0.379 | 0.351    | 16 |
| 5                                                       | 0.809        | 0.402 | 0.332    | 66 | 0.614    | 0.561 | 0.434    | 16 |
| Svob2007-chal2 HF STO-3G/MPA/FROG2 MM-OPT $R^2=0.839$   |              |       |          |    |          |       |          |    |
| 1                                                       | 0.837        | 0.354 | 0.284    | 65 | 0.925    | 0.278 | 0.237    | 17 |
| 2                                                       | 0.855        | 0.311 | 0.252    | 65 | 0.852    | 0.444 | 0.326    | 17 |
| 3                                                       | 0.881        | 0.320 | 0.255    | 66 | 0.758    | 0.420 | 0.341    | 16 |
| 4                                                       | 0.884        | 0.316 | 0.245    | 66 | 0.425    | 0.702 | 0.419    | 16 |
| 5                                                       | 0.861        | 0.343 | 0.290    | 66 | 0.861    | 0.352 | 0.280    | 16 |
| Svob2007-chal2 HF STO-3G/MPA/FROG2 NO-OPT $R^2=0.799$   |              |       |          |    |          |       |          |    |
| 1                                                       | 0.803        | 0.389 | 0.322    | 65 | 0.930    | 0.290 | 0.202    | 17 |
| 2                                                       | 0.820        | 0.347 | 0.289    | 65 | 0.844    | 0.462 | 0.369    | 17 |



Table S5: Cross-validation results.

| Fold                                                      | Training set |       |          |    | Test set |       |          |    |
|-----------------------------------------------------------|--------------|-------|----------|----|----------|-------|----------|----|
|                                                           | $R^2$        | RMSE  | $\Delta$ | N  | $Q^2$    | RMSE  | $\Delta$ | N  |
| 3                                                         | 0.844        | 0.367 | 0.293    | 66 | 0.737    | 0.406 | 0.355    | 16 |
| 4                                                         | 0.853        | 0.356 | 0.289    | 66 | 0.548    | 0.597 | 0.455    | 16 |
| 5                                                         | 0.864        | 0.339 | 0.273    | 66 | 0.699    | 0.514 | 0.422    | 16 |
| Svob2007-chal2 HF STO-3G/MPA/FROG2 QM-OPT $R^2=0.819$     |              |       |          |    |          |       |          |    |
| 1                                                         | 0.813        | 0.380 | 0.298    | 65 | 0.928    | 0.278 | 0.219    | 17 |
| 2                                                         | 0.844        | 0.323 | 0.266    | 65 | 0.796    | 0.525 | 0.374    | 17 |
| 3                                                         | 0.858        | 0.350 | 0.273    | 66 | 0.711    | 0.416 | 0.352    | 16 |
| 4                                                         | 0.869        | 0.336 | 0.258    | 66 | 0.441    | 0.729 | 0.433    | 16 |
| 5                                                         | 0.857        | 0.347 | 0.276    | 66 | 0.763    | 0.439 | 0.373    | 16 |
| Svob2007-chal2 HF STO-3G/MPA/NCI MM-OPT $R^2=0.829$       |              |       |          |    |          |       |          |    |
| 1                                                         | 0.839        | 0.353 | 0.281    | 65 | 0.928    | 0.288 | 0.216    | 17 |
| 2                                                         | 0.855        | 0.312 | 0.232    | 65 | 0.809    | 0.537 | 0.375    | 17 |
| 3                                                         | 0.893        | 0.303 | 0.238    | 66 | 0.647    | 0.481 | 0.389    | 16 |
| 4                                                         | 0.881        | 0.320 | 0.246    | 66 | 0.715    | 0.415 | 0.339    | 16 |
| 5                                                         | 0.853        | 0.352 | 0.286    | 66 | 0.856    | 0.302 | 0.226    | 16 |
| Svob2007-chal2 HF STO-3G/MPA/NCI NO-OPT $R^2=0.846$       |              |       |          |    |          |       |          |    |
| 1                                                         | 0.851        | 0.340 | 0.265    | 65 | 0.950    | 0.222 | 0.187    | 17 |
| 2                                                         | 0.875        | 0.290 | 0.222    | 65 | 0.645    | 0.737 | 0.404    | 17 |
| 3                                                         | 0.886        | 0.313 | 0.244    | 66 | 0.797    | 0.355 | 0.272    | 16 |
| 4                                                         | 0.913        | 0.274 | 0.208    | 66 | 0.663    | 0.476 | 0.391    | 16 |
| 5                                                         | 0.879        | 0.320 | 0.250    | 66 | 0.847    | 0.323 | 0.238    | 16 |
| Svob2007-chal2 HF STO-3G/MPA/NCI QM-OPT $R^2=0.787$       |              |       |          |    |          |       |          |    |
| 1                                                         | 0.782        | 0.410 | 0.327    | 65 | 0.942    | 0.247 | 0.185    | 17 |
| 2                                                         | 0.826        | 0.341 | 0.258    | 65 | 0.737    | 0.650 | 0.419    | 17 |
| 3                                                         | 0.863        | 0.343 | 0.243    | 66 | 0.592    | 0.545 | 0.410    | 16 |
| 4                                                         | 0.836        | 0.377 | 0.302    | 66 | 0.687    | 0.434 | 0.358    | 16 |
| 5                                                         | 0.843        | 0.364 | 0.296    | 66 | 0.615    | 0.513 | 0.344    | 16 |
| Svob2007-chal2 HF STO-3G/MPA/OPENBABEL MM-OPT $R^2=0.765$ |              |       |          |    |          |       |          |    |
| 1                                                         | 0.816        | 0.377 | 0.317    | 65 | 0.848    | 0.426 | 0.312    | 17 |
| 2                                                         | 0.791        | 0.375 | 0.322    | 65 | 0.899    | 0.388 | 0.325    | 17 |
| 3                                                         | 0.857        | 0.351 | 0.295    | 66 | 0.674    | 0.482 | 0.413    | 16 |
| 4                                                         | 0.839        | 0.373 | 0.320    | 66 | 0.761    | 0.386 | 0.339    | 16 |
| 5                                                         | 0.845        | 0.362 | 0.306    | 66 | 0.738    | 0.453 | 0.373    | 16 |
| Svob2007-chal2 HF STO-3G/MPA/OPENBABEL NO-OPT $R^2=0.773$ |              |       |          |    |          |       |          |    |
| 1                                                         | 0.819        | 0.374 | 0.317    | 65 | 0.851    | 0.421 | 0.306    | 17 |
| 2                                                         | 0.793        | 0.372 | 0.318    | 65 | 0.904    | 0.383 | 0.317    | 17 |
| 3                                                         | 0.860        | 0.347 | 0.292    | 66 | 0.669    | 0.477 | 0.407    | 16 |
| 4                                                         | 0.840        | 0.372 | 0.319    | 66 | 0.766    | 0.374 | 0.332    | 16 |
| 5                                                         | 0.847        | 0.359 | 0.305    | 66 | 0.743    | 0.449 | 0.370    | 16 |
| Svob2007-chal2 HF STO-3G/MPA/OPENBABEL QM-OPT $R^2=0.724$ |              |       |          |    |          |       |          |    |
| 1                                                         | 0.781        | 0.411 | 0.333    | 65 | 0.903    | 0.395 | 0.277    | 17 |
| 2                                                         | 0.757        | 0.404 | 0.327    | 65 | 0.897    | 0.376 | 0.311    | 17 |
| 3                                                         | 0.843        | 0.367 | 0.297    | 66 | 0.629    | 0.520 | 0.450    | 16 |
| 4                                                         | 0.815        | 0.400 | 0.332    | 66 | 0.768    | 0.390 | 0.328    | 16 |
| 5                                                         | 0.851        | 0.355 | 0.286    | 66 | 0.612    | 0.593 | 0.425    | 16 |
| Svob2007-chal2 HF STO-3G/MPA/PUBCHEM MM-OPT $R^2=0.838$   |              |       |          |    |          |       |          |    |
| 1                                                         | 0.850        | 0.340 | 0.272    | 65 | 0.959    | 0.235 | 0.182    | 17 |
| 2                                                         | 0.862        | 0.304 | 0.236    | 65 | 0.895    | 0.388 | 0.274    | 17 |
| 3                                                         | 0.901        | 0.292 | 0.228    | 66 | 0.707    | 0.468 | 0.398    | 16 |
| 4                                                         | 0.888        | 0.311 | 0.235    | 66 | 0.775    | 0.359 | 0.304    | 16 |
| 5                                                         | 0.874        | 0.327 | 0.261    | 66 | 0.871    | 0.294 | 0.226    | 16 |
| Svob2007-chal2 HF STO-3G/MPA/PUBCHEM NO-OPT $R^2=0.884$   |              |       |          |    |          |       |          |    |
| 1                                                         | 0.866        | 0.321 | 0.258    | 65 | 0.965    | 0.221 | 0.183    | 17 |
| 2                                                         | 0.899        | 0.261 | 0.203    | 65 | 0.855    | 0.443 | 0.289    | 17 |
| 3                                                         | 0.904        | 0.288 | 0.220    | 66 | 0.830    | 0.372 | 0.313    | 16 |
| 4                                                         | 0.902        | 0.291 | 0.223    | 66 | 0.829    | 0.352 | 0.274    | 16 |
| 5                                                         | 0.878        | 0.320 | 0.255    | 66 | 0.935    | 0.209 | 0.179    | 16 |
| Svob2007-chal2 HF STO-3G/MPA/PUBCHEM QM-OPT $R^2=0.746$   |              |       |          |    |          |       |          |    |
| 1                                                         | 0.796        | 0.397 | 0.307    | 65 | 0.917    | 0.297 | 0.238    | 17 |

Table S5: Cross-validation results.

| Fold                                                  | Training set |       |          |    | Test set |       |          |    |
|-------------------------------------------------------|--------------|-------|----------|----|----------|-------|----------|----|
|                                                       | $R^2$        | RMSE  | $\Delta$ | N  | $Q^2$    | RMSE  | $\Delta$ | N  |
| 2                                                     | 0.780        | 0.384 | 0.292    | 65 | 0.907    | 0.355 | 0.288    | 17 |
| 3                                                     | 0.887        | 0.312 | 0.249    | 66 | 0.554    | 0.624 | 0.492    | 16 |
| 4                                                     | 0.836        | 0.376 | 0.286    | 66 | 0.775    | 0.392 | 0.350    | 16 |
| 5                                                     | 0.838        | 0.370 | 0.295    | 66 | 0.760    | 0.454 | 0.321    | 16 |
| Svob2007-chal2 HF STO-3G/MPA/RDKit MM-OPT $R^2=0.700$ |              |       |          |    |          |       |          |    |
| 1                                                     | 0.760        | 0.430 | 0.359    | 65 | 0.922    | 0.291 | 0.226    | 17 |
| 2                                                     | 0.764        | 0.398 | 0.321    | 65 | 0.875    | 0.436 | 0.372    | 17 |
| 3                                                     | 0.858        | 0.350 | 0.285    | 66 | 0.329    | 0.662 | 0.563    | 16 |
| 4                                                     | 0.808        | 0.408 | 0.333    | 66 | 0.683    | 0.404 | 0.326    | 16 |
| 5                                                     | 0.839        | 0.369 | 0.305    | 66 | 0.622    | 0.559 | 0.424    | 16 |
| Svob2007-chal2 HF STO-3G/MPA/RDKit QM-OPT $R^2=0.641$ |              |       |          |    |          |       |          |    |
| 1                                                     | 0.708        | 0.475 | 0.385    | 65 | 0.888    | 0.345 | 0.278    | 17 |
| 2                                                     | 0.689        | 0.457 | 0.367    | 65 | 0.886    | 0.429 | 0.373    | 17 |
| 3                                                     | 0.837        | 0.374 | 0.287    | 66 | 0.202    | 0.752 | 0.635    | 16 |
| 4                                                     | 0.750        | 0.465 | 0.382    | 66 | 0.665    | 0.400 | 0.337    | 16 |
| 5                                                     | 0.805        | 0.406 | 0.327    | 66 | 0.534    | 0.649 | 0.473    | 16 |
| Svob2007-chal2 HF STO-3G/MPA/RDKit MM-OPT $R^2=0.744$ |              |       |          |    |          |       |          |    |
| 1                                                     | 0.808        | 0.385 | 0.312    | 65 | 0.873    | 0.381 | 0.319    | 17 |
| 2                                                     | 0.798        | 0.368 | 0.295    | 65 | 0.875    | 0.423 | 0.346    | 17 |
| 3                                                     | 0.839        | 0.372 | 0.301    | 66 | 0.706    | 0.437 | 0.341    | 16 |
| 4                                                     | 0.834        | 0.379 | 0.305    | 66 | 0.778    | 0.380 | 0.312    | 16 |
| 5                                                     | 0.856        | 0.349 | 0.283    | 66 | 0.580    | 0.558 | 0.404    | 16 |
| Svob2007-chal2 HF STO-3G/MPA/RDKit NO-OPT $R^2=0.760$ |              |       |          |    |          |       |          |    |
| 1                                                     | 0.812        | 0.381 | 0.301    | 65 | 0.918    | 0.305 | 0.240    | 17 |
| 2                                                     | 0.820        | 0.347 | 0.273    | 65 | 0.861    | 0.433 | 0.319    | 17 |
| 3                                                     | 0.850        | 0.359 | 0.277    | 66 | 0.739    | 0.397 | 0.342    | 16 |
| 4                                                     | 0.860        | 0.348 | 0.277    | 66 | 0.606    | 0.448 | 0.324    | 16 |
| 5                                                     | 0.842        | 0.365 | 0.292    | 66 | 0.807    | 0.379 | 0.299    | 16 |

Table S5: Cross-validation results.

| Fold                                                       | Training set |       |          |    | Test set |       |          |    |
|------------------------------------------------------------|--------------|-------|----------|----|----------|-------|----------|----|
|                                                            | $R^2$        | RMSE  | $\Delta$ | N  | $Q^2$    | RMSE  | $\Delta$ | N  |
| <b>Anilines</b>                                            |              |       |          |    |          |       |          |    |
| Bult2002-npa B3LYP 6-31G*/NPA/BALLOON MM-OPT $R^2=0.855$   |              |       |          |    |          |       |          |    |
| 1                                                          | 0.866        | 0.850 | 0.649    | 38 | 0.806    | 0.914 | 0.744    | 10 |
| 2                                                          | 0.886        | 0.767 | 0.560    | 38 | 0.808    | 1.263 | 0.960    | 10 |
| 3                                                          | 0.862        | 0.879 | 0.636    | 38 | 0.819    | 0.742 | 0.593    | 10 |
| 4                                                          | 0.785        | 0.897 | 0.689    | 39 | 0.973    | 0.678 | 0.583    | 9  |
| 5                                                          | 0.885        | 0.717 | 0.606    | 39 | 0.740    | 1.313 | 0.927    | 9  |
| Bult2002-npa B3LYP 6-31G*/NPA/BALLOON NO-OPT $R^2=0.826$   |              |       |          |    |          |       |          |    |
| 1                                                          | 0.835        | 0.944 | 0.696    | 38 | 0.863    | 0.960 | 0.828    | 10 |
| 2                                                          | 0.863        | 0.842 | 0.661    | 38 | 0.607    | 1.711 | 1.319    | 10 |
| 3                                                          | 0.845        | 0.932 | 0.686    | 38 | 0.742    | 0.941 | 0.841    | 10 |
| 4                                                          | 0.790        | 0.887 | 0.685    | 39 | 0.920    | 1.308 | 0.926    | 9  |
| 5                                                          | 0.852        | 0.813 | 0.674    | 39 | 0.695    | 1.451 | 1.019    | 9  |
| Bult2002-npa B3LYP 6-31G*/NPA/BALLOON QM-OPT $R^2=0.908$   |              |       |          |    |          |       |          |    |
| 1                                                          | 0.931        | 0.611 | 0.470    | 38 | 0.645    | 0.966 | 0.815    | 10 |
| 2                                                          | 0.910        | 0.680 | 0.554    | 38 | 0.703    | 1.138 | 0.766    | 10 |
| 3                                                          | 0.937        | 0.594 | 0.455    | 38 | 0.617    | 1.006 | 0.750    | 10 |
| 4                                                          | 0.868        | 0.705 | 0.590    | 39 | 0.996    | 0.724 | 0.562    | 9  |
| 5                                                          | 0.911        | 0.631 | 0.494    | 39 | 0.873    | 0.942 | 0.698    | 9  |
| Bult2002-npa B3LYP 6-31G*/NPA/FROG2 MM-OPT $R^2=0.852$     |              |       |          |    |          |       |          |    |
| 1                                                          | 0.880        | 0.806 | 0.653    | 38 | 0.728    | 1.156 | 1.001    | 10 |
| 2                                                          | 0.885        | 0.770 | 0.605    | 38 | 0.682    | 1.533 | 1.145    | 10 |
| 3                                                          | 0.870        | 0.853 | 0.666    | 38 | 0.764    | 0.927 | 0.780    | 10 |
| 4                                                          | 0.778        | 0.912 | 0.742    | 39 | 0.982    | 0.727 | 0.590    | 9  |
| 5                                                          | 0.875        | 0.746 | 0.629    | 39 | 0.711    | 1.383 | 0.983    | 9  |
| Bult2002-npa B3LYP 6-31G*/NPA/FROG2 NO-OPT $R^2=0.904$     |              |       |          |    |          |       |          |    |
| 1                                                          | 0.924        | 0.642 | 0.494    | 38 | 0.714    | 1.028 | 0.849    | 10 |
| 2                                                          | 0.925        | 0.623 | 0.470    | 38 | 0.674    | 1.142 | 0.912    | 10 |
| 3                                                          | 0.911        | 0.705 | 0.548    | 38 | 0.884    | 0.662 | 0.566    | 10 |
| 4                                                          | 0.884        | 0.659 | 0.547    | 39 | 0.986    | 0.942 | 0.552    | 9  |
| 5                                                          | 0.908        | 0.641 | 0.486    | 39 | 0.865    | 0.962 | 0.748    | 9  |
| Bult2002-npa B3LYP 6-31G*/NPA/FROG2 QM-OPT $R^2=0.907$     |              |       |          |    |          |       |          |    |
| 1                                                          | 0.920        | 0.657 | 0.530    | 38 | 0.799    | 0.784 | 0.666    | 10 |
| 2                                                          | 0.907        | 0.695 | 0.578    | 38 | 0.814    | 0.934 | 0.704    | 10 |
| 3                                                          | 0.929        | 0.631 | 0.510    | 38 | 0.789    | 0.889 | 0.812    | 10 |
| 4                                                          | 0.902        | 0.608 | 0.519    | 39 | 0.893    | 1.050 | 0.628    | 9  |
| 5                                                          | 0.914        | 0.618 | 0.493    | 39 | 0.774    | 1.409 | 0.894    | 9  |
| Bult2002-npa B3LYP 6-31G*/NPA/NCI MM-OPT $R^2=0.848$       |              |       |          |    |          |       |          |    |
| 1                                                          | 0.869        | 0.842 | 0.645    | 38 | 0.747    | 1.060 | 0.905    | 10 |
| 2                                                          | 0.882        | 0.782 | 0.589    | 38 | 0.665    | 1.671 | 1.332    | 10 |
| 3                                                          | 0.859        | 0.888 | 0.656    | 38 | 0.755    | 0.813 | 0.700    | 10 |
| 4                                                          | 0.768        | 0.933 | 0.732    | 39 | 0.979    | 0.680 | 0.574    | 9  |
| 5                                                          | 0.879        | 0.736 | 0.628    | 39 | 0.715    | 1.345 | 0.953    | 9  |
| Bult2002-npa B3LYP 6-31G*/NPA/NCI NO-OPT $R^2=0.839$       |              |       |          |    |          |       |          |    |
| 1                                                          | 0.847        | 0.910 | 0.702    | 38 | 0.845    | 0.982 | 0.847    | 10 |
| 2                                                          | 0.871        | 0.816 | 0.634    | 38 | 0.620    | 1.638 | 1.235    | 10 |
| 3                                                          | 0.857        | 0.893 | 0.662    | 38 | 0.731    | 0.986 | 0.906    | 10 |
| 4                                                          | 0.773        | 0.923 | 0.735    | 39 | 0.961    | 0.864 | 0.680    | 9  |
| 5                                                          | 0.883        | 0.725 | 0.598    | 39 | 0.635    | 1.497 | 1.131    | 9  |
| Bult2002-npa B3LYP 6-31G*/NPA/NCI QM-OPT $R^2=0.869$       |              |       |          |    |          |       |          |    |
| 1                                                          | 0.912        | 0.692 | 0.545    | 38 | 0.684    | 1.359 | 1.213    | 10 |
| 2                                                          | 0.886        | 0.767 | 0.623    | 38 | 0.792    | 1.130 | 0.801    | 10 |
| 3                                                          | 0.891        | 0.781 | 0.647    | 38 | 0.769    | 0.927 | 0.775    | 10 |
| 4                                                          | 0.812        | 0.840 | 0.710    | 39 | 0.964    | 0.785 | 0.680    | 9  |
| 5                                                          | 0.866        | 0.775 | 0.641    | 39 | 0.807    | 1.073 | 0.870    | 9  |
| Bult2002-npa B3LYP 6-31G*/NPA/OPENBABEL MM-OPT $R^2=0.857$ |              |       |          |    |          |       |          |    |
| 1                                                          | 0.886        | 0.785 | 0.621    | 38 | 0.784    | 1.150 | 0.964    | 10 |
| 2                                                          | 0.891        | 0.751 | 0.581    | 38 | 0.664    | 1.527 | 1.110    | 10 |
| 3                                                          | 0.870        | 0.851 | 0.662    | 38 | 0.774    | 0.866 | 0.741    | 10 |

Table S5: Cross-validation results.

| Fold                                                               | Training set |       |          |    | Test set |       |          |    |
|--------------------------------------------------------------------|--------------|-------|----------|----|----------|-------|----------|----|
|                                                                    | $R^2$        | RMSE  | $\Delta$ | N  | $Q^2$    | RMSE  | $\Delta$ | N  |
| 4                                                                  | 0.783        | 0.903 | 0.735    | 39 | 0.980    | 0.637 | 0.474    | 9  |
| 5                                                                  | 0.884        | 0.720 | 0.594    | 39 | 0.702    | 1.399 | 1.017    | 9  |
| Bult2002- <i>npa</i> B3LYP 6-31G*/NPA/OPENBABEL NO-OPT $R^2=0.851$ |              |       |          |    |          |       |          |    |
| 1                                                                  | 0.876        | 0.820 | 0.666    | 38 | 0.793    | 1.137 | 0.994    | 10 |
| 2                                                                  | 0.886        | 0.768 | 0.617    | 38 | 0.626    | 1.598 | 1.149    | 10 |
| 3                                                                  | 0.868        | 0.860 | 0.677    | 38 | 0.750    | 0.906 | 0.793    | 10 |
| 4                                                                  | 0.778        | 0.912 | 0.754    | 39 | 0.980    | 0.691 | 0.527    | 9  |
| 5                                                                  | 0.877        | 0.741 | 0.628    | 39 | 0.694    | 1.423 | 1.052    | 9  |
| Bult2002- <i>npa</i> B3LYP 6-31G*/NPA/OPENBABEL QM-OPT $R^2=0.939$ |              |       |          |    |          |       |          |    |
| 1                                                                  | 0.960        | 0.463 | 0.395    | 38 | 0.718    | 0.829 | 0.737    | 10 |
| 2                                                                  | 0.935        | 0.580 | 0.495    | 38 | 0.917    | 0.496 | 0.363    | 10 |
| 3                                                                  | 0.955        | 0.501 | 0.394    | 38 | 0.850    | 0.748 | 0.684    | 10 |
| 4                                                                  | 0.915        | 0.564 | 0.483    | 39 | 0.991    | 0.565 | 0.404    | 9  |
| 5                                                                  | 0.932        | 0.550 | 0.452    | 39 | 0.934    | 0.698 | 0.543    | 9  |
| Bult2002- <i>npa</i> B3LYP 6-31G*/NPA/PUBCHEM MM-OPT $R^2=0.872$   |              |       |          |    |          |       |          |    |
| 1                                                                  | 0.891        | 0.766 | 0.600    | 38 | 0.568    | 1.036 | 0.877    | 10 |
| 2                                                                  | 0.895        | 0.737 | 0.579    | 38 | 0.787    | 1.236 | 0.890    | 10 |
| 3                                                                  | 0.890        | 0.783 | 0.603    | 38 | 0.739    | 0.907 | 0.817    | 10 |
| 4                                                                  | 0.805        | 0.855 | 0.694    | 39 | 0.987    | 0.584 | 0.475    | 9  |
| 5                                                                  | 0.896        | 0.682 | 0.590    | 39 | 0.763    | 1.253 | 0.880    | 9  |
| Bult2002- <i>npa</i> B3LYP 6-31G*/NPA/PUBCHEM NO-OPT $R^2=0.874$   |              |       |          |    |          |       |          |    |
| 1                                                                  | 0.909        | 0.700 | 0.562    | 38 | 0.759    | 1.303 | 1.099    | 10 |
| 2                                                                  | 0.896        | 0.733 | 0.573    | 38 | 0.723    | 1.236 | 0.897    | 10 |
| 3                                                                  | 0.893        | 0.774 | 0.616    | 38 | 0.770    | 0.973 | 0.883    | 10 |
| 4                                                                  | 0.806        | 0.853 | 0.721    | 39 | 0.987    | 0.656 | 0.489    | 9  |
| 5                                                                  | 0.886        | 0.713 | 0.597    | 39 | 0.789    | 1.121 | 0.978    | 9  |
| Bult2002- <i>npa</i> B3LYP 6-31G*/NPA/PUBCHEM QM-OPT $R^2=0.867$   |              |       |          |    |          |       |          |    |
| 1                                                                  | 0.892        | 0.764 | 0.623    | 38 | 0.769    | 1.089 | 0.994    | 10 |
| 2                                                                  | 0.885        | 0.770 | 0.647    | 38 | 0.688    | 1.338 | 0.976    | 10 |
| 3                                                                  | 0.901        | 0.746 | 0.593    | 38 | 0.765    | 1.094 | 0.969    | 10 |
| 4                                                                  | 0.840        | 0.774 | 0.659    | 39 | 0.952    | 1.212 | 0.715    | 9  |
| 5                                                                  | 0.861        | 0.788 | 0.651    | 39 | 0.808    | 1.092 | 0.824    | 9  |
| Bult2002- <i>npa</i> B3LYP 6-31G*/NPA/RDKIT MM-OPT $R^2=0.843$     |              |       |          |    |          |       |          |    |
| 1                                                                  | 0.851        | 0.897 | 0.688    | 38 | 0.866    | 0.953 | 0.850    | 10 |
| 2                                                                  | 0.881        | 0.785 | 0.654    | 38 | 0.430    | 1.957 | 1.405    | 10 |
| 3                                                                  | 0.854        | 0.905 | 0.688    | 38 | 0.786    | 0.827 | 0.718    | 10 |
| 4                                                                  | 0.801        | 0.864 | 0.679    | 39 | 0.940    | 1.037 | 0.821    | 9  |
| 5                                                                  | 0.876        | 0.745 | 0.607    | 39 | 0.720    | 1.409 | 1.125    | 9  |
| Bult2002- <i>npa</i> B3LYP 6-31G*/NPA/RDKIT QM-OPT $R^2=0.869$     |              |       |          |    |          |       |          |    |
| 1                                                                  | 0.912        | 0.690 | 0.542    | 38 | 0.616    | 1.336 | 1.165    | 10 |
| 2                                                                  | 0.890        | 0.752 | 0.610    | 38 | 0.753    | 1.180 | 0.815    | 10 |
| 3                                                                  | 0.893        | 0.773 | 0.632    | 38 | 0.804    | 0.994 | 0.841    | 10 |
| 4                                                                  | 0.805        | 0.855 | 0.739    | 39 | 0.981    | 0.653 | 0.549    | 9  |
| 5                                                                  | 0.864        | 0.781 | 0.642    | 39 | 0.779    | 1.173 | 0.921    | 9  |
| Bult2002- <i>npa</i> B3LYP 6-31G*/NPA/RDKIT MM-OPT $R^2=0.854$     |              |       |          |    |          |       |          |    |
| 1                                                                  | 0.881        | 0.803 | 0.640    | 38 | 0.776    | 1.138 | 0.988    | 10 |
| 2                                                                  | 0.885        | 0.772 | 0.596    | 38 | 0.672    | 1.496 | 1.091    | 10 |
| 3                                                                  | 0.873        | 0.843 | 0.643    | 38 | 0.734    | 0.934 | 0.815    | 10 |
| 4                                                                  | 0.777        | 0.915 | 0.741    | 39 | 0.985    | 0.672 | 0.484    | 9  |
| 5                                                                  | 0.874        | 0.750 | 0.641    | 39 | 0.726    | 1.310 | 1.000    | 9  |
| Bult2002- <i>npa</i> B3LYP 6-31G*/NPA/RDKIT NO-OPT $R^2=0.840$     |              |       |          |    |          |       |          |    |
| 1                                                                  | 0.861        | 0.867 | 0.657    | 38 | 0.893    | 1.162 | 0.984    | 10 |
| 2                                                                  | 0.878        | 0.794 | 0.645    | 38 | 0.610    | 1.482 | 1.149    | 10 |
| 3                                                                  | 0.855        | 0.900 | 0.691    | 38 | 0.797    | 0.926 | 0.777    | 10 |
| 4                                                                  | 0.806        | 0.853 | 0.715    | 39 | 0.968    | 1.190 | 0.789    | 9  |
| 5                                                                  | 0.860        | 0.792 | 0.624    | 39 | 0.748    | 1.393 | 1.044    | 9  |
| Bult2004- <i>aim</i> B3LYP 6-31G*/AIM/BALLOON MM-OPT $R^2=0.880$   |              |       |          |    |          |       |          |    |
| 1                                                                  | 0.909        | 0.701 | 0.537    | 38 | 0.761    | 1.219 | 1.107    | 10 |
| 2                                                                  | 0.895        | 0.738 | 0.577    | 38 | 0.617    | 1.242 | 0.802    | 10 |

Table S5: Cross-validation results.

| Fold                                                       | Training set |       |          |    | Test set |       |          |    |
|------------------------------------------------------------|--------------|-------|----------|----|----------|-------|----------|----|
|                                                            | $R^2$        | RMSE  | $\Delta$ | N  | $Q^2$    | RMSE  | $\Delta$ | N  |
| 3                                                          | 0.889        | 0.786 | 0.581    | 38 | 0.808    | 0.716 | 0.641    | 10 |
| 4                                                          | 0.819        | 0.825 | 0.655    | 39 | 0.987    | 0.626 | 0.543    | 9  |
| 5                                                          | 0.923        | 0.588 | 0.487    | 39 | 0.669    | 1.501 | 1.186    | 9  |
| Bult2004-aim B3LYP 6-31G*/AIM/BALLOON NO-OPT $R^2=0.870$   |              |       |          |    |          |       |          |    |
| 1                                                          | 0.897        | 0.747 | 0.578    | 38 | 0.676    | 1.091 | 0.931    | 10 |
| 2                                                          | 0.881        | 0.785 | 0.629    | 38 | 0.689    | 1.222 | 0.947    | 10 |
| 3                                                          | 0.885        | 0.804 | 0.619    | 38 | 0.783    | 0.835 | 0.708    | 10 |
| 4                                                          | 0.824        | 0.812 | 0.667    | 39 | 0.947    | 0.994 | 0.677    | 9  |
| 5                                                          | 0.904        | 0.653 | 0.532    | 39 | 0.709    | 1.422 | 1.122    | 9  |
| Bult2004-aim B3LYP 6-31G*/AIM/BALLOON QM-OPT $R^2=0.945$   |              |       |          |    |          |       |          |    |
| 1                                                          | 0.958        | 0.477 | 0.344    | 38 | 0.808    | 0.689 | 0.540    | 10 |
| 2                                                          | 0.951        | 0.505 | 0.365    | 38 | 0.771    | 0.805 | 0.497    | 10 |
| 3                                                          | 0.953        | 0.512 | 0.396    | 38 | 0.842    | 0.603 | 0.347    | 10 |
| 4                                                          | 0.929        | 0.516 | 0.389    | 39 | 0.967    | 0.590 | 0.459    | 9  |
| 5                                                          | 0.948        | 0.484 | 0.391    | 39 | 0.905    | 0.769 | 0.657    | 9  |
| Bult2004-aim B3LYP 6-31G*/AIM/FROG2 MM-OPT $R^2=0.902$     |              |       |          |    |          |       |          |    |
| 1                                                          | 0.924        | 0.640 | 0.534    | 38 | 0.853    | 0.944 | 0.746    | 10 |
| 2                                                          | 0.913        | 0.671 | 0.527    | 38 | 0.719    | 1.029 | 0.780    | 10 |
| 3                                                          | 0.915        | 0.690 | 0.552    | 38 | 0.852    | 0.779 | 0.710    | 10 |
| 4                                                          | 0.873        | 0.690 | 0.550    | 39 | 0.935    | 0.919 | 0.733    | 9  |
| 5                                                          | 0.919        | 0.603 | 0.498    | 39 | 0.660    | 1.497 | 1.239    | 9  |
| Bult2004-aim B3LYP 6-31G*/AIM/FROG2 NO-OPT $R^2=0.887$     |              |       |          |    |          |       |          |    |
| 1                                                          | 0.914        | 0.681 | 0.489    | 38 | 0.699    | 0.993 | 0.828    | 10 |
| 2                                                          | 0.886        | 0.767 | 0.562    | 38 | 0.868    | 0.776 | 0.663    | 10 |
| 3                                                          | 0.884        | 0.806 | 0.564    | 38 | 0.953    | 0.478 | 0.409    | 10 |
| 4                                                          | 0.869        | 0.701 | 0.531    | 39 | 0.909    | 1.129 | 0.785    | 9  |
| 5                                                          | 0.906        | 0.647 | 0.463    | 39 | 0.786    | 1.135 | 0.887    | 9  |
| Bult2004-aim B3LYP 6-31G*/AIM/FROG2 QM-OPT $R^2=0.939$     |              |       |          |    |          |       |          |    |
| 1                                                          | 0.953        | 0.506 | 0.418    | 38 | 0.855    | 0.730 | 0.566    | 10 |
| 2                                                          | 0.935        | 0.578 | 0.481    | 38 | 0.921    | 0.486 | 0.416    | 10 |
| 3                                                          | 0.949        | 0.535 | 0.438    | 38 | 0.871    | 0.637 | 0.552    | 10 |
| 4                                                          | 0.915        | 0.565 | 0.471    | 39 | 0.978    | 0.546 | 0.463    | 9  |
| 5                                                          | 0.949        | 0.475 | 0.404    | 39 | 0.872    | 1.010 | 0.826    | 9  |
| Bult2004-aim B3LYP 6-31G*/AIM/NCI MM-OPT $R^2=0.889$       |              |       |          |    |          |       |          |    |
| 1                                                          | 0.906        | 0.712 | 0.544    | 38 | 0.847    | 0.969 | 0.709    | 10 |
| 2                                                          | 0.902        | 0.710 | 0.534    | 38 | 0.696    | 1.197 | 0.926    | 10 |
| 3                                                          | 0.895        | 0.768 | 0.564    | 38 | 0.852    | 0.658 | 0.554    | 10 |
| 4                                                          | 0.854        | 0.739 | 0.514    | 39 | 0.930    | 1.063 | 0.817    | 9  |
| 5                                                          | 0.935        | 0.538 | 0.443    | 39 | 0.648    | 1.558 | 1.266    | 9  |
| Bult2004-aim B3LYP 6-31G*/AIM/NCI NO-OPT $R^2=0.882$       |              |       |          |    |          |       |          |    |
| 1                                                          | 0.909        | 0.702 | 0.563    | 38 | 0.726    | 1.075 | 0.899    | 10 |
| 2                                                          | 0.898        | 0.725 | 0.567    | 38 | 0.715    | 1.153 | 0.943    | 10 |
| 3                                                          | 0.890        | 0.786 | 0.606    | 38 | 0.837    | 0.700 | 0.585    | 10 |
| 4                                                          | 0.888        | 0.649 | 0.534    | 39 | 0.417    | 2.491 | 1.336    | 9  |
| 5                                                          | 0.911        | 0.632 | 0.528    | 39 | 0.711    | 1.324 | 1.082    | 9  |
| Bult2004-aim B3LYP 6-31G*/AIM/NCI QM-OPT $R^2=0.920$       |              |       |          |    |          |       |          |    |
| 1                                                          | 0.935        | 0.593 | 0.470    | 38 | 0.855    | 0.779 | 0.639    | 10 |
| 2                                                          | 0.926        | 0.619 | 0.478    | 38 | 0.742    | 0.930 | 0.602    | 10 |
| 3                                                          | 0.921        | 0.666 | 0.530    | 38 | 0.907    | 0.498 | 0.405    | 10 |
| 4                                                          | 0.890        | 0.641 | 0.504    | 39 | 0.966    | 0.640 | 0.494    | 9  |
| 5                                                          | 0.943        | 0.503 | 0.411    | 39 | 0.775    | 1.167 | 0.992    | 9  |
| Bult2004-aim B3LYP 6-31G*/AIM/OPENBABEL MM-OPT $R^2=0.897$ |              |       |          |    |          |       |          |    |
| 1                                                          | 0.916        | 0.674 | 0.553    | 38 | 0.855    | 0.894 | 0.704    | 10 |
| 2                                                          | 0.910        | 0.680 | 0.522    | 38 | 0.679    | 1.098 | 0.761    | 10 |
| 3                                                          | 0.911        | 0.706 | 0.561    | 38 | 0.850    | 0.781 | 0.734    | 10 |
| 4                                                          | 0.875        | 0.686 | 0.541    | 39 | 0.903    | 1.052 | 0.836    | 9  |
| 5                                                          | 0.920        | 0.598 | 0.492    | 39 | 0.637    | 1.573 | 1.261    | 9  |
| Bult2004-aim B3LYP 6-31G*/AIM/OPENBABEL NO-OPT $R^2=0.899$ |              |       |          |    |          |       |          |    |
| 1                                                          | 0.917        | 0.669 | 0.542    | 38 | 0.810    | 0.857 | 0.719    | 10 |

Table S5: Cross-validation results.

| Fold                                                       | Training set |       |          |    | Test set |       |          |    |
|------------------------------------------------------------|--------------|-------|----------|----|----------|-------|----------|----|
|                                                            | $R^2$        | RMSE  | $\Delta$ | N  | $Q^2$    | RMSE  | $\Delta$ | N  |
| 2                                                          | 0.907        | 0.692 | 0.537    | 38 | 0.718    | 0.992 | 0.713    | 10 |
| 3                                                          | 0.914        | 0.693 | 0.553    | 38 | 0.834    | 0.808 | 0.733    | 10 |
| 4                                                          | 0.876        | 0.683 | 0.538    | 39 | 0.907    | 0.997 | 0.755    | 9  |
| 5                                                          | 0.917        | 0.609 | 0.526    | 39 | 0.662    | 1.511 | 1.223    | 9  |
| Bult2004-aim B3LYP 6-31G*/AIM/OPENBABEL QM-OPT $R^2=0.934$ |              |       |          |    |          |       |          |    |
| 1                                                          | 0.948        | 0.529 | 0.429    | 38 | 0.851    | 0.745 | 0.595    | 10 |
| 2                                                          | 0.931        | 0.599 | 0.496    | 38 | 0.910    | 0.522 | 0.413    | 10 |
| 3                                                          | 0.944        | 0.559 | 0.452    | 38 | 0.871    | 0.644 | 0.584    | 10 |
| 4                                                          | 0.913        | 0.573 | 0.476    | 39 | 0.963    | 0.614 | 0.479    | 9  |
| 5                                                          | 0.948        | 0.480 | 0.392    | 39 | 0.790    | 1.290 | 0.892    | 9  |
| Bult2004-aim B3LYP 6-31G*/AIM/PUBCHEM MM-OPT $R^2=0.900$   |              |       |          |    |          |       |          |    |
| 1                                                          | 0.929        | 0.619 | 0.521    | 38 | 0.855    | 1.102 | 0.896    | 10 |
| 2                                                          | 0.918        | 0.650 | 0.516    | 38 | 0.678    | 1.189 | 0.869    | 10 |
| 3                                                          | 0.910        | 0.711 | 0.561    | 38 | 0.854    | 0.703 | 0.622    | 10 |
| 4                                                          | 0.865        | 0.713 | 0.558    | 39 | 0.950    | 0.873 | 0.677    | 9  |
| 5                                                          | 0.928        | 0.568 | 0.454    | 39 | 0.602    | 1.822 | 1.379    | 9  |
| Bult2004-aim B3LYP 6-31G*/AIM/PUBCHEM NO-OPT $R^2=0.907$   |              |       |          |    |          |       |          |    |
| 1                                                          | 0.922        | 0.651 | 0.515    | 38 | 0.784    | 0.868 | 0.691    | 10 |
| 2                                                          | 0.914        | 0.665 | 0.516    | 38 | 0.759    | 0.874 | 0.618    | 10 |
| 3                                                          | 0.911        | 0.706 | 0.536    | 38 | 0.887    | 0.580 | 0.518    | 10 |
| 4                                                          | 0.861        | 0.723 | 0.588    | 39 | 0.992    | 0.731 | 0.501    | 9  |
| 5                                                          | 0.936        | 0.535 | 0.455    | 39 | 0.786    | 1.180 | 0.963    | 9  |
| Bult2004-aim B3LYP 6-31G*/AIM/PUBCHEM QM-OPT $R^2=0.927$   |              |       |          |    |          |       |          |    |
| 1                                                          | 0.950        | 0.518 | 0.433    | 38 | 0.819    | 0.899 | 0.673    | 10 |
| 2                                                          | 0.926        | 0.618 | 0.480    | 38 | 0.862    | 0.654 | 0.466    | 10 |
| 3                                                          | 0.936        | 0.598 | 0.459    | 38 | 0.856    | 0.664 | 0.537    | 10 |
| 4                                                          | 0.897        | 0.623 | 0.504    | 39 | 0.965    | 0.655 | 0.521    | 9  |
| 5                                                          | 0.931        | 0.554 | 0.440    | 39 | 0.903    | 0.824 | 0.712    | 9  |
| Bult2004-aim B3LYP 6-31G*/AIM/RDKIT MM-OPT $R^2=0.875$     |              |       |          |    |          |       |          |    |
| 1                                                          | 0.879        | 0.808 | 0.594    | 38 | 0.875    | 0.716 | 0.620    | 10 |
| 2                                                          | 0.893        | 0.745 | 0.580    | 38 | 0.640    | 1.160 | 0.816    | 10 |
| 3                                                          | 0.884        | 0.804 | 0.611    | 38 | 0.797    | 0.735 | 0.572    | 10 |
| 4                                                          | 0.810        | 0.844 | 0.649    | 39 | 0.984    | 0.550 | 0.409    | 9  |
| 5                                                          | 0.922        | 0.590 | 0.464    | 39 | 0.707    | 1.404 | 1.126    | 9  |
| Bult2004-aim B3LYP 6-31G*/AIM/RDKIT QM-OPT $R^2=0.923$     |              |       |          |    |          |       |          |    |
| 1                                                          | 0.941        | 0.567 | 0.457    | 38 | 0.796    | 0.834 | 0.719    | 10 |
| 2                                                          | 0.928        | 0.611 | 0.469    | 38 | 0.854    | 0.808 | 0.611    | 10 |
| 3                                                          | 0.928        | 0.636 | 0.503    | 38 | 0.931    | 0.568 | 0.511    | 10 |
| 4                                                          | 0.901        | 0.608 | 0.504    | 39 | 0.959    | 0.732 | 0.513    | 9  |
| 5                                                          | 0.938        | 0.524 | 0.423    | 39 | 0.789    | 1.126 | 0.922    | 9  |
| Bult2004-aim B3LYP 6-31G*/AIM/RDKIT MM-OPT $R^2=0.897$     |              |       |          |    |          |       |          |    |
| 1                                                          | 0.916        | 0.675 | 0.545    | 38 | 0.838    | 0.908 | 0.722    | 10 |
| 2                                                          | 0.910        | 0.682 | 0.519    | 38 | 0.721    | 1.107 | 0.852    | 10 |
| 3                                                          | 0.908        | 0.717 | 0.580    | 38 | 0.855    | 0.760 | 0.689    | 10 |
| 4                                                          | 0.880        | 0.671 | 0.520    | 39 | 0.897    | 1.168 | 0.923    | 9  |
| 5                                                          | 0.922        | 0.590 | 0.486    | 39 | 0.639    | 1.579 | 1.233    | 9  |
| Bult2004-aim B3LYP 6-31G*/AIM/RDKIT NO-OPT $R^2=0.857$     |              |       |          |    |          |       |          |    |
| 1                                                          | 0.889        | 0.776 | 0.568    | 38 | 0.823    | 1.296 | 0.971    | 10 |
| 2                                                          | 0.886        | 0.767 | 0.591    | 38 | 0.644    | 1.517 | 1.144    | 10 |
| 3                                                          | 0.857        | 0.896 | 0.674    | 38 | 0.880    | 0.581 | 0.447    | 10 |
| 4                                                          | 0.807        | 0.851 | 0.669    | 39 | 0.984    | 0.925 | 0.555    | 9  |
| 5                                                          | 0.902        | 0.662 | 0.505    | 39 | 0.741    | 1.476 | 1.115    | 9  |
| Chavez2006 B3LYP 6-31G*/MPA/BALLOON MM-OPT $R^2=0.845$     |              |       |          |    |          |       |          |    |
| 1                                                          | 0.860        | 0.871 | 0.653    | 38 | 0.739    | 1.059 | 0.763    | 10 |
| 2                                                          | 0.867        | 0.830 | 0.638    | 38 | 0.629    | 1.427 | 1.002    | 10 |
| 3                                                          | 0.855        | 0.901 | 0.659    | 38 | 0.823    | 0.829 | 0.774    | 10 |
| 4                                                          | 0.791        | 0.886 | 0.672    | 39 | 0.955    | 0.944 | 0.743    | 9  |
| 5                                                          | 0.883        | 0.722 | 0.584    | 39 | 0.705    | 1.441 | 1.047    | 9  |
| Chavez2006 B3LYP 6-31G*/MPA/BALLOON NO-OPT $R^2=0.847$     |              |       |          |    |          |       |          |    |

Table S5: Cross-validation results.

| Fold                                                     | Training set |       |          |    | Test set |       |          |    |
|----------------------------------------------------------|--------------|-------|----------|----|----------|-------|----------|----|
|                                                          | $R^2$        | RMSE  | $\Delta$ | N  | $Q^2$    | RMSE  | $\Delta$ | N  |
| 1                                                        | 0.868        | 0.846 | 0.642    | 38 | 0.745    | 1.164 | 0.810    | 10 |
| 2                                                        | 0.871        | 0.816 | 0.663    | 38 | 0.609    | 1.580 | 1.278    | 10 |
| 3                                                        | 0.862        | 0.879 | 0.646    | 38 | 0.798    | 0.884 | 0.814    | 10 |
| 4                                                        | 0.809        | 0.847 | 0.665    | 39 | 0.934    | 1.165 | 0.850    | 9  |
| 5                                                        | 0.882        | 0.726 | 0.593    | 39 | 0.684    | 1.497 | 1.096    | 9  |
| Chavez2006 B3LYP 6-31G*/MPA/BALLOON QM-OPT $R^2=0.930$   |              |       |          |    |          |       |          |    |
| 1                                                        | 0.941        | 0.567 | 0.428    | 38 | 0.836    | 0.704 | 0.600    | 10 |
| 2                                                        | 0.938        | 0.565 | 0.441    | 38 | 0.790    | 0.905 | 0.564    | 10 |
| 3                                                        | 0.948        | 0.541 | 0.446    | 38 | 0.745    | 0.783 | 0.484    | 10 |
| 4                                                        | 0.903        | 0.603 | 0.462    | 39 | 0.966    | 0.543 | 0.491    | 9  |
| 5                                                        | 0.931        | 0.555 | 0.441    | 39 | 0.893    | 0.827 | 0.693    | 9  |
| Chavez2006 B3LYP 6-31G*/MPA/FROG2 MM-OPT $R^2=0.857$     |              |       |          |    |          |       |          |    |
| 1                                                        | 0.880        | 0.804 | 0.660    | 38 | 0.790    | 1.140 | 0.911    | 10 |
| 2                                                        | 0.883        | 0.778 | 0.618    | 38 | 0.606    | 1.518 | 1.083    | 10 |
| 3                                                        | 0.874        | 0.839 | 0.693    | 38 | 0.794    | 0.908 | 0.861    | 10 |
| 4                                                        | 0.815        | 0.833 | 0.680    | 39 | 0.914    | 1.067 | 0.859    | 9  |
| 5                                                        | 0.877        | 0.740 | 0.616    | 39 | 0.743    | 1.272 | 1.081    | 9  |
| Chavez2006 B3LYP 6-31G*/MPA/FROG2 NO-OPT $R^2=0.879$     |              |       |          |    |          |       |          |    |
| 1                                                        | 0.907        | 0.711 | 0.565    | 38 | 0.753    | 1.114 | 0.959    | 10 |
| 2                                                        | 0.891        | 0.751 | 0.559    | 38 | 0.648    | 1.100 | 0.805    | 10 |
| 3                                                        | 0.884        | 0.807 | 0.595    | 38 | 0.917    | 0.692 | 0.563    | 10 |
| 4                                                        | 0.851        | 0.747 | 0.578    | 39 | 0.970    | 1.006 | 0.637    | 9  |
| 5                                                        | 0.894        | 0.689 | 0.508    | 39 | 0.783    | 1.200 | 0.938    | 9  |
| Chavez2006 B3LYP 6-31G*/MPA/FROG2 QM-OPT $R^2=0.926$     |              |       |          |    |          |       |          |    |
| 1                                                        | 0.942        | 0.560 | 0.469    | 38 | 0.817    | 0.824 | 0.678    | 10 |
| 2                                                        | 0.928        | 0.611 | 0.531    | 38 | 0.893    | 0.707 | 0.559    | 10 |
| 3                                                        | 0.936        | 0.597 | 0.519    | 38 | 0.845    | 0.684 | 0.596    | 10 |
| 4                                                        | 0.915        | 0.564 | 0.480    | 39 | 0.928    | 0.834 | 0.724    | 9  |
| 5                                                        | 0.921        | 0.593 | 0.524    | 39 | 0.909    | 0.773 | 0.719    | 9  |
| Chavez2006 B3LYP 6-31G*/MPA/NCI MM-OPT $R^2=0.834$       |              |       |          |    |          |       |          |    |
| 1                                                        | 0.853        | 0.891 | 0.662    | 38 | 0.815    | 1.141 | 0.899    | 10 |
| 2                                                        | 0.862        | 0.845 | 0.635    | 38 | 0.549    | 1.640 | 1.151    | 10 |
| 3                                                        | 0.851        | 0.913 | 0.677    | 38 | 0.746    | 0.932 | 0.882    | 10 |
| 4                                                        | 0.777        | 0.914 | 0.711    | 39 | 0.942    | 1.034 | 0.777    | 9  |
| 5                                                        | 0.876        | 0.744 | 0.618    | 39 | 0.673    | 1.503 | 1.187    | 9  |
| Chavez2006 B3LYP 6-31G*/MPA/NCI NO-OPT $R^2=0.852$       |              |       |          |    |          |       |          |    |
| 1                                                        | 0.871        | 0.836 | 0.664    | 38 | 0.803    | 1.154 | 0.918    | 10 |
| 2                                                        | 0.878        | 0.794 | 0.630    | 38 | 0.633    | 1.438 | 1.092    | 10 |
| 3                                                        | 0.868        | 0.859 | 0.659    | 38 | 0.778    | 0.903 | 0.855    | 10 |
| 4                                                        | 0.792        | 0.884 | 0.717    | 39 | 0.975    | 0.990 | 0.679    | 9  |
| 5                                                        | 0.888        | 0.707 | 0.597    | 39 | 0.684    | 1.408 | 1.113    | 9  |
| Chavez2006 B3LYP 6-31G*/MPA/NCI QM-OPT $R^2=0.884$       |              |       |          |    |          |       |          |    |
| 1                                                        | 0.909        | 0.700 | 0.563    | 38 | 0.771    | 1.133 | 0.861    | 10 |
| 2                                                        | 0.900        | 0.718 | 0.592    | 38 | 0.699    | 1.281 | 0.928    | 10 |
| 3                                                        | 0.894        | 0.771 | 0.641    | 38 | 0.873    | 0.765 | 0.618    | 10 |
| 4                                                        | 0.845        | 0.764 | 0.616    | 39 | 0.940    | 0.790 | 0.685    | 9  |
| 5                                                        | 0.906        | 0.648 | 0.519    | 39 | 0.722    | 1.306 | 1.102    | 9  |
| Chavez2006 B3LYP 6-31G*/MPA/OPENBABEL MM-OPT $R^2=0.851$ |              |       |          |    |          |       |          |    |
| 1                                                        | 0.869        | 0.841 | 0.664    | 38 | 0.849    | 1.056 | 0.901    | 10 |
| 2                                                        | 0.880        | 0.789 | 0.633    | 38 | 0.584    | 1.546 | 1.115    | 10 |
| 3                                                        | 0.871        | 0.848 | 0.679    | 38 | 0.770    | 0.951 | 0.905    | 10 |
| 4                                                        | 0.812        | 0.840 | 0.680    | 39 | 0.847    | 1.278 | 0.955    | 9  |
| 5                                                        | 0.876        | 0.745 | 0.605    | 39 | 0.725    | 1.339 | 1.079    | 9  |
| Chavez2006 B3LYP 6-31G*/MPA/OPENBABEL NO-OPT $R^2=0.849$ |              |       |          |    |          |       |          |    |
| 1                                                        | 0.870        | 0.839 | 0.659    | 38 | 0.836    | 1.094 | 0.891    | 10 |
| 2                                                        | 0.882        | 0.782 | 0.612    | 38 | 0.574    | 1.586 | 1.113    | 10 |
| 3                                                        | 0.868        | 0.858 | 0.673    | 38 | 0.763    | 0.967 | 0.917    | 10 |
| 4                                                        | 0.813        | 0.839 | 0.678    | 39 | 0.775    | 1.523 | 1.110    | 9  |
| 5                                                        | 0.878        | 0.739 | 0.590    | 39 | 0.708    | 1.395 | 1.081    | 9  |

Table S5: Cross-validation results.

| Fold                                                     | Training set |       |          |    | Test set |       |          |    |
|----------------------------------------------------------|--------------|-------|----------|----|----------|-------|----------|----|
|                                                          | $R^2$        | RMSE  | $\Delta$ | N  | $Q^2$    | RMSE  | $\Delta$ | N  |
| Chavez2006 B3LYP 6-31G*/MPA/OPENBABEL QM-OPT $R^2=0.935$ |              |       |          |    |          |       |          |    |
| 1                                                        | 0.948        | 0.530 | 0.440    | 38 | 0.845    | 0.739 | 0.646    | 10 |
| 2                                                        | 0.940        | 0.556 | 0.473    | 38 | 0.847    | 0.756 | 0.571    | 10 |
| 3                                                        | 0.944        | 0.561 | 0.474    | 38 | 0.881    | 0.645 | 0.541    | 10 |
| 4                                                        | 0.919        | 0.550 | 0.471    | 39 | 0.948    | 0.708 | 0.619    | 9  |
| 5                                                        | 0.933        | 0.547 | 0.462    | 39 | 0.939    | 0.717 | 0.626    | 9  |
| Chavez2006 B3LYP 6-31G*/MPA/PUBCHEM MM-OPT $R^2=0.852$   |              |       |          |    |          |       |          |    |
| 1                                                        | 0.880        | 0.804 | 0.644    | 38 | 0.804    | 1.336 | 1.063    | 10 |
| 2                                                        | 0.881        | 0.784 | 0.602    | 38 | 0.613    | 1.499 | 1.064    | 10 |
| 3                                                        | 0.870        | 0.852 | 0.665    | 38 | 0.786    | 0.925 | 0.879    | 10 |
| 4                                                        | 0.797        | 0.872 | 0.716    | 39 | 0.965    | 0.943 | 0.692    | 9  |
| 5                                                        | 0.877        | 0.740 | 0.596    | 39 | 0.731    | 1.348 | 1.004    | 9  |
| Chavez2006 B3LYP 6-31G*/MPA/PUBCHEM NO-OPT $R^2=0.881$   |              |       |          |    |          |       |          |    |
| 1                                                        | 0.906        | 0.714 | 0.558    | 38 | 0.829    | 1.114 | 0.977    | 10 |
| 2                                                        | 0.900        | 0.717 | 0.565    | 38 | 0.693    | 1.266 | 0.954    | 10 |
| 3                                                        | 0.898        | 0.755 | 0.584    | 38 | 0.831    | 0.969 | 0.864    | 10 |
| 4                                                        | 0.829        | 0.800 | 0.653    | 39 | 0.974    | 0.749 | 0.598    | 9  |
| 5                                                        | 0.904        | 0.654 | 0.559    | 39 | 0.764    | 1.191 | 1.003    | 9  |
| Chavez2006 B3LYP 6-31G*/MPA/PUBCHEM QM-OPT $R^2=0.905$   |              |       |          |    |          |       |          |    |
| 1                                                        | 0.933        | 0.603 | 0.469    | 38 | 0.736    | 1.098 | 0.850    | 10 |
| 2                                                        | 0.907        | 0.692 | 0.559    | 38 | 0.844    | 0.867 | 0.662    | 10 |
| 3                                                        | 0.933        | 0.614 | 0.506    | 38 | 0.806    | 1.062 | 0.742    | 10 |
| 4                                                        | 0.865        | 0.712 | 0.579    | 39 | 0.977    | 0.648 | 0.487    | 9  |
| 5                                                        | 0.900        | 0.669 | 0.548    | 39 | 0.916    | 0.827 | 0.681    | 9  |
| Chavez2006 B3LYP 6-31G*/MPA/RDKit MM-OPT $R^2=0.845$     |              |       |          |    |          |       |          |    |
| 1                                                        | 0.854        | 0.889 | 0.686    | 38 | 0.866    | 0.921 | 0.781    | 10 |
| 2                                                        | 0.885        | 0.769 | 0.622    | 38 | 0.485    | 1.828 | 1.379    | 10 |
| 3                                                        | 0.859        | 0.887 | 0.669    | 38 | 0.778    | 0.900 | 0.849    | 10 |
| 4                                                        | 0.799        | 0.868 | 0.679    | 39 | 0.933    | 1.050 | 0.757    | 9  |
| 5                                                        | 0.877        | 0.742 | 0.587    | 39 | 0.707    | 1.405 | 1.099    | 9  |
| Chavez2006 B3LYP 6-31G*/MPA/RDKit QM-OPT $R^2=0.892$     |              |       |          |    |          |       |          |    |
| 1                                                        | 0.917        | 0.668 | 0.529    | 38 | 0.710    | 1.124 | 0.791    | 10 |
| 2                                                        | 0.915        | 0.663 | 0.524    | 38 | 0.655    | 1.281 | 0.943    | 10 |
| 3                                                        | 0.906        | 0.725 | 0.586    | 38 | 0.877    | 0.850 | 0.666    | 10 |
| 4                                                        | 0.844        | 0.766 | 0.630    | 39 | 0.972    | 0.632 | 0.478    | 9  |
| 5                                                        | 0.910        | 0.635 | 0.504    | 39 | 0.721    | 1.344 | 1.113    | 9  |
| Chavez2006 B3LYP 6-31G*/MPA/RDKit MM-OPT $R^2=0.852$     |              |       |          |    |          |       |          |    |
| 1                                                        | 0.868        | 0.843 | 0.677    | 38 | 0.868    | 0.984 | 0.871    | 10 |
| 2                                                        | 0.882        | 0.781 | 0.617    | 38 | 0.535    | 1.641 | 1.161    | 10 |
| 3                                                        | 0.875        | 0.837 | 0.684    | 38 | 0.747    | 0.994 | 0.930    | 10 |
| 4                                                        | 0.818        | 0.826 | 0.673    | 39 | 0.840    | 1.276 | 0.918    | 9  |
| 5                                                        | 0.877        | 0.742 | 0.604    | 39 | 0.723    | 1.353 | 1.099    | 9  |
| Chavez2006 B3LYP 6-31G*/MPA/RDKit NO-OPT $R^2=0.842$     |              |       |          |    |          |       |          |    |
| 1                                                        | 0.866        | 0.852 | 0.616    | 38 | 0.880    | 1.194 | 0.967    | 10 |
| 2                                                        | 0.857        | 0.859 | 0.640    | 38 | 0.722    | 1.424 | 1.117    | 10 |
| 3                                                        | 0.848        | 0.921 | 0.682    | 38 | 0.865    | 0.761 | 0.683    | 10 |
| 4                                                        | 0.832        | 0.793 | 0.659    | 39 | 0.953    | 1.450 | 0.794    | 9  |
| 5                                                        | 0.877        | 0.741 | 0.569    | 39 | 0.729    | 1.421 | 1.122    | 9  |
| QM B3LYP 6-31G*/AIM/BALLOON MM-OPT $R^2=0.921$           |              |       |          |    |          |       |          |    |
| 1                                                        | 0.928        | 0.626 | 0.430    | 38 | 0.843    | 0.696 | 0.597    | 10 |
| 2                                                        | 0.957        | 0.472 | 0.348    | 38 | 0.596    | 1.305 | 0.783    | 10 |
| 3                                                        | 0.926        | 0.643 | 0.494    | 38 | 0.865    | 0.653 | 0.465    | 10 |
| 4                                                        | 0.900        | 0.612 | 0.450    | 39 | 0.948    | 0.847 | 0.606    | 9  |
| 5                                                        | 0.916        | 0.611 | 0.480    | 39 | 0.897    | 0.784 | 0.584    | 9  |
| QM B3LYP 6-31G*/AIM/BALLOON NO-OPT $R^2=0.805$           |              |       |          |    |          |       |          |    |
| 1                                                        | 0.824        | 0.976 | 0.757    | 38 | 0.822    | 0.890 | 0.634    | 10 |
| 2                                                        | 0.879        | 0.792 | 0.623    | 38 | 0.537    | 1.617 | 1.366    | 10 |
| 3                                                        | 0.836        | 0.959 | 0.757    | 38 | 0.632    | 1.007 | 0.758    | 10 |
| 4                                                        | 0.769        | 0.931 | 0.768    | 39 | 0.902    | 1.195 | 0.929    | 9  |



Table S5: Cross-validation results.

| Fold                                             | Training set |       |          |    | Test set |       |          |    |
|--------------------------------------------------|--------------|-------|----------|----|----------|-------|----------|----|
|                                                  | $R^2$        | RMSE  | $\Delta$ | N  | $Q^2$    | RMSE  | $\Delta$ | N  |
| 5                                                | 0.813        | 0.915 | 0.735    | 39 | 0.839    | 1.108 | 0.909    | 9  |
| QM B3LYP 6-31G*/AIM/BALLOON QM-OPT $R^2=0.921$   |              |       |          |    |          |       |          |    |
| 1                                                | 0.924        | 0.643 | 0.508    | 38 | 0.869    | 0.660 | 0.552    | 10 |
| 2                                                | 0.974        | 0.366 | 0.267    | 38 | 0.520    | 1.611 | 1.227    | 10 |
| 3                                                | 0.930        | 0.625 | 0.472    | 38 | 0.869    | 0.663 | 0.480    | 10 |
| 4                                                | 0.913        | 0.572 | 0.438    | 39 | 0.991    | 1.600 | 1.054    | 9  |
| 5                                                | 0.904        | 0.655 | 0.503    | 39 | 0.988    | 0.512 | 0.460    | 9  |
| QM B3LYP 6-31G*/AIM/FROG2 MM-OPT $R^2=0.926$     |              |       |          |    |          |       |          |    |
| 1                                                | 0.935        | 0.592 | 0.469    | 38 | 0.861    | 0.666 | 0.542    | 10 |
| 2                                                | 0.948        | 0.517 | 0.416    | 38 | 0.716    | 0.991 | 0.690    | 10 |
| 3                                                | 0.927        | 0.637 | 0.500    | 38 | 0.891    | 0.559 | 0.454    | 10 |
| 4                                                | 0.915        | 0.564 | 0.437    | 39 | 0.969    | 0.989 | 0.749    | 9  |
| 5                                                | 0.924        | 0.583 | 0.461    | 39 | 0.972    | 0.747 | 0.582    | 9  |
| QM B3LYP 6-31G*/AIM/FROG2 NO-OPT $R^2=0.916$     |              |       |          |    |          |       |          |    |
| 1                                                | 0.929        | 0.618 | 0.486    | 38 | 0.802    | 0.812 | 0.737    | 10 |
| 2                                                | 0.948        | 0.516 | 0.422    | 38 | 0.467    | 1.408 | 0.922    | 10 |
| 3                                                | 0.925        | 0.649 | 0.520    | 38 | 0.862    | 0.755 | 0.584    | 10 |
| 4                                                | 0.877        | 0.681 | 0.538    | 39 | 0.979    | 0.526 | 0.433    | 9  |
| 5                                                | 0.921        | 0.595 | 0.467    | 39 | 0.929    | 0.903 | 0.713    | 9  |
| QM B3LYP 6-31G*/AIM/FROG2 QM-OPT $R^2=0.853$     |              |       |          |    |          |       |          |    |
| 1                                                | 0.861        | 0.868 | 0.705    | 38 | 0.779    | 0.915 | 0.845    | 10 |
| 2                                                | 0.872        | 0.812 | 0.641    | 38 | 0.739    | 1.089 | 0.818    | 10 |
| 3                                                | 0.862        | 0.879 | 0.715    | 38 | 0.832    | 0.806 | 0.695    | 10 |
| 4                                                | 0.889        | 0.645 | 0.535    | 39 | 0.977    | 2.478 | 1.400    | 9  |
| 5                                                | 0.882        | 0.725 | 0.556    | 39 | 0.240    | 3.421 | 1.592    | 9  |
| QM B3LYP 6-31G*/AIM/NCI MM-OPT $R^2=0.914$       |              |       |          |    |          |       |          |    |
| 1                                                | 0.926        | 0.634 | 0.487    | 38 | 0.814    | 0.801 | 0.674    | 10 |
| 2                                                | 0.948        | 0.520 | 0.370    | 38 | 0.584    | 1.290 | 0.765    | 10 |
| 3                                                | 0.916        | 0.687 | 0.553    | 38 | 0.904    | 0.548 | 0.515    | 10 |
| 4                                                | 0.885        | 0.656 | 0.539    | 39 | 0.979    | 0.882 | 0.695    | 9  |
| 5                                                | 0.914        | 0.620 | 0.509    | 39 | 0.908    | 0.813 | 0.607    | 9  |
| QM B3LYP 6-31G*/AIM/NCI NO-OPT $R^2=0.903$       |              |       |          |    |          |       |          |    |
| 1                                                | 0.907        | 0.710 | 0.531    | 38 | 0.802    | 0.775 | 0.620    | 10 |
| 2                                                | 0.907        | 0.693 | 0.457    | 38 | 0.855    | 0.858 | 0.678    | 10 |
| 3                                                | 0.912        | 0.701 | 0.502    | 38 | 0.921    | 0.692 | 0.536    | 10 |
| 4                                                | 0.932        | 0.503 | 0.374    | 39 | 0.987    | 1.619 | 0.864    | 9  |
| 5                                                | 0.910        | 0.636 | 0.505    | 39 | 0.927    | 0.939 | 0.588    | 9  |
| QM B3LYP 6-31G*/AIM/NCI QM-OPT $R^2=0.892$       |              |       |          |    |          |       |          |    |
| 1                                                | 0.908        | 0.707 | 0.568    | 38 | 0.781    | 0.973 | 0.822    | 10 |
| 2                                                | 0.933        | 0.589 | 0.445    | 38 | 0.597    | 1.292 | 1.032    | 10 |
| 3                                                | 0.913        | 0.696 | 0.559    | 38 | 0.710    | 0.873 | 0.737    | 10 |
| 4                                                | 0.851        | 0.747 | 0.619    | 39 | 0.974    | 0.786 | 0.689    | 9  |
| 5                                                | 0.871        | 0.759 | 0.627    | 39 | 0.985    | 0.647 | 0.559    | 9  |
| QM B3LYP 6-31G*/AIM/OPENBABEL MM-OPT $R^2=0.927$ |              |       |          |    |          |       |          |    |
| 1                                                | 0.938        | 0.579 | 0.459    | 38 | 0.862    | 0.699 | 0.552    | 10 |
| 2                                                | 0.947        | 0.523 | 0.417    | 38 | 0.749    | 0.948 | 0.658    | 10 |
| 3                                                | 0.930        | 0.625 | 0.477    | 38 | 0.874    | 0.596 | 0.457    | 10 |
| 4                                                | 0.916        | 0.562 | 0.425    | 39 | 0.966    | 1.007 | 0.761    | 9  |
| 5                                                | 0.926        | 0.576 | 0.446    | 39 | 0.971    | 0.748 | 0.577    | 9  |
| QM B3LYP 6-31G*/AIM/OPENBABEL NO-OPT $R^2=0.930$ |              |       |          |    |          |       |          |    |
| 1                                                | 0.940        | 0.571 | 0.431    | 38 | 0.883    | 0.693 | 0.512    | 10 |
| 2                                                | 0.949        | 0.512 | 0.388    | 38 | 0.713    | 0.971 | 0.644    | 10 |
| 3                                                | 0.934        | 0.607 | 0.460    | 38 | 0.885    | 0.558 | 0.414    | 10 |
| 4                                                | 0.913        | 0.570 | 0.443    | 39 | 0.964    | 0.896 | 0.659    | 9  |
| 5                                                | 0.929        | 0.562 | 0.415    | 39 | 0.963    | 0.748 | 0.595    | 9  |
| QM B3LYP 6-31G*/AIM/OPENBABEL QM-OPT $R^2=0.880$ |              |       |          |    |          |       |          |    |
| 1                                                | 0.889        | 0.776 | 0.625    | 38 | 0.803    | 0.847 | 0.711    | 10 |
| 2                                                | 0.941        | 0.551 | 0.416    | 38 | 0.496    | 1.707 | 1.336    | 10 |
| 3                                                | 0.882        | 0.814 | 0.671    | 38 | 0.908    | 0.627 | 0.539    | 10 |

Table S5: Cross-validation results.

| Fold                                           | Training set |       |          |    | Test set |       |          |    |
|------------------------------------------------|--------------|-------|----------|----|----------|-------|----------|----|
|                                                | $R^2$        | RMSE  | $\Delta$ | N  | $Q^2$    | RMSE  | $\Delta$ | N  |
| 4                                              | 0.891        | 0.639 | 0.520    | 39 | 0.978    | 2.592 | 1.488    | 9  |
| 5                                              | 0.893        | 0.691 | 0.527    | 39 | 0.319    | 2.905 | 1.388    | 9  |
| QM B3LYP 6-31G*/AIM/PUBCHEM MM-OPT $R^2=0.916$ |              |       |          |    |          |       |          |    |
| 1                                              | 0.927        | 0.630 | 0.495    | 38 | 0.807    | 0.818 | 0.677    | 10 |
| 2                                              | 0.946        | 0.528 | 0.391    | 38 | 0.696    | 1.120 | 0.833    | 10 |
| 3                                              | 0.921        | 0.665 | 0.514    | 38 | 0.846    | 0.638 | 0.525    | 10 |
| 4                                              | 0.894        | 0.630 | 0.502    | 39 | 0.970    | 0.900 | 0.706    | 9  |
| 5                                              | 0.914        | 0.621 | 0.497    | 39 | 0.957    | 0.789 | 0.590    | 9  |
| QM B3LYP 6-31G*/AIM/PUBCHEM NO-OPT $R^2=0.937$ |              |       |          |    |          |       |          |    |
| 1                                              | 0.950        | 0.518 | 0.378    | 38 | 0.804    | 0.702 | 0.565    | 10 |
| 2                                              | 0.938        | 0.565 | 0.449    | 38 | 0.906    | 0.570 | 0.447    | 10 |
| 3                                              | 0.944        | 0.558 | 0.426    | 38 | 0.852    | 0.642 | 0.543    | 10 |
| 4                                              | 0.916        | 0.561 | 0.431    | 39 | 0.971    | 0.655 | 0.492    | 9  |
| 5                                              | 0.940        | 0.518 | 0.410    | 39 | 0.948    | 0.755 | 0.549    | 9  |
| QM B3LYP 6-31G*/AIM/PUBCHEM QM-OPT $R^2=0.828$ |              |       |          |    |          |       |          |    |
| 1                                              | 0.859        | 0.872 | 0.709    | 38 | 0.724    | 1.289 | 1.132    | 10 |
| 2                                              | 0.851        | 0.878 | 0.746    | 38 | 0.539    | 1.519 | 1.235    | 10 |
| 3                                              | 0.853        | 0.906 | 0.743    | 38 | 0.681    | 1.035 | 0.886    | 10 |
| 4                                              | 0.779        | 0.910 | 0.752    | 39 | 0.949    | 1.023 | 0.822    | 9  |
| 5                                              | 0.879        | 0.735 | 0.626    | 39 | 0.218    | 3.821 | 1.982    | 9  |
| QM B3LYP 6-31G*/AIM/RDKit MM-OPT $R^2=0.980$   |              |       |          |    |          |       |          |    |
| 1                                              | 0.982        | 0.313 | 0.260    | 38 | 0.957    | 0.326 | 0.287    | 10 |
| 2                                              | 0.985        | 0.274 | 0.224    | 38 | 0.939    | 0.478 | 0.419    | 10 |
| 3                                              | 0.980        | 0.331 | 0.270    | 38 | 0.972    | 0.260 | 0.224    | 10 |
| 4                                              | 0.972        | 0.323 | 0.263    | 39 | 0.993    | 0.303 | 0.250    | 9  |
| 5                                              | 0.984        | 0.270 | 0.231    | 39 | 0.965    | 0.518 | 0.425    | 9  |
| QM B3LYP 6-31G*/AIM/RDKit QM-OPT $R^2=0.908$   |              |       |          |    |          |       |          |    |
| 1                                              | 0.908        | 0.704 | 0.523    | 38 | 0.902    | 0.643 | 0.531    | 10 |
| 2                                              | 0.933        | 0.586 | 0.458    | 38 | 0.689    | 0.996 | 0.755    | 10 |
| 3                                              | 0.931        | 0.623 | 0.472    | 38 | 0.683    | 0.874 | 0.626    | 10 |
| 4                                              | 0.893        | 0.633 | 0.468    | 39 | 0.983    | 1.364 | 0.928    | 9  |
| 5                                              | 0.892        | 0.695 | 0.524    | 39 | 0.987    | 0.652 | 0.528    | 9  |
| QM B3LYP 6-31G*/AIM/RDKit MM-OPT $R^2=0.927$   |              |       |          |    |          |       |          |    |
| 1                                              | 0.938        | 0.579 | 0.443    | 38 | 0.860    | 0.723 | 0.560    | 10 |
| 2                                              | 0.949        | 0.516 | 0.402    | 38 | 0.724    | 0.976 | 0.652    | 10 |
| 3                                              | 0.932        | 0.619 | 0.461    | 38 | 0.867    | 0.605 | 0.462    | 10 |
| 4                                              | 0.909        | 0.584 | 0.449    | 39 | 0.977    | 0.920 | 0.669    | 9  |
| 5                                              | 0.925        | 0.580 | 0.443    | 39 | 0.974    | 0.738 | 0.551    | 9  |
| QM B3LYP 6-31G*/AIM/RDKit NO-OPT $R^2=0.796$   |              |       |          |    |          |       |          |    |
| 1                                              | 0.818        | 0.993 | 0.782    | 38 | 0.750    | 1.182 | 0.869    | 10 |
| 2                                              | 0.840        | 0.909 | 0.699    | 38 | 0.611    | 1.429 | 1.084    | 10 |
| 3                                              | 0.798        | 1.064 | 0.833    | 38 | 0.795    | 0.706 | 0.524    | 10 |
| 4                                              | 0.783        | 0.903 | 0.767    | 39 | 0.883    | 1.459 | 1.198    | 9  |
| 5                                              | 0.781        | 0.988 | 0.755    | 39 | 0.751    | 1.227 | 1.087    | 9  |
| QM B3LYP 6-31G*/MPA/BALLOON MM-OPT $R^2=0.953$ |              |       |          |    |          |       |          |    |
| 1                                              | 0.957        | 0.480 | 0.314    | 38 | 0.912    | 0.510 | 0.371    | 10 |
| 2                                              | 0.964        | 0.429 | 0.269    | 38 | 0.666    | 1.068 | 0.557    | 10 |
| 3                                              | 0.950        | 0.530 | 0.366    | 38 | 0.979    | 0.222 | 0.193    | 10 |
| 4                                              | 0.937        | 0.485 | 0.311    | 39 | 0.983    | 0.586 | 0.482    | 9  |
| 5                                              | 0.971        | 0.358 | 0.266    | 39 | 0.876    | 0.863 | 0.577    | 9  |
| QM B3LYP 6-31G*/MPA/BALLOON NO-OPT $R^2=0.903$ |              |       |          |    |          |       |          |    |
| 1                                              | 0.916        | 0.673 | 0.518    | 38 | 0.808    | 0.796 | 0.611    | 10 |
| 2                                              | 0.927        | 0.616 | 0.463    | 38 | 0.591    | 1.376 | 1.119    | 10 |
| 3                                              | 0.911        | 0.705 | 0.550    | 38 | 0.857    | 0.687 | 0.530    | 10 |
| 4                                              | 0.884        | 0.658 | 0.491    | 39 | 0.887    | 1.054 | 0.783    | 9  |
| 5                                              | 0.910        | 0.634 | 0.498    | 39 | 0.856    | 0.945 | 0.695    | 9  |
| QM B3LYP 6-31G*/MPA/BALLOON QM-OPT $R^2=0.967$ |              |       |          |    |          |       |          |    |
| 1                                              | 0.970        | 0.401 | 0.284    | 38 | 0.925    | 0.415 | 0.309    | 10 |
| 2                                              | 0.980        | 0.321 | 0.238    | 38 | 0.747    | 1.015 | 0.735    | 10 |

Table S5: Cross-validation results.

| Fold                                             | Training set |       |          |    | Test set |       |          |    |
|--------------------------------------------------|--------------|-------|----------|----|----------|-------|----------|----|
|                                                  | $R^2$        | RMSE  | $\Delta$ | N  | $Q^2$    | RMSE  | $\Delta$ | N  |
| 3                                                | 0.970        | 0.413 | 0.306    | 38 | 0.958    | 0.419 | 0.350    | 10 |
| 4                                                | 0.952        | 0.423 | 0.318    | 39 | 0.994    | 0.409 | 0.348    | 9  |
| 5                                                | 0.980        | 0.302 | 0.229    | 39 | 0.917    | 0.744 | 0.554    | 9  |
| QM B3LYP 6-31G*/MPA/FROG2 MM-OPT $R^2=0.973$     |              |       |          |    |          |       |          |    |
| 1                                                | 0.981        | 0.321 | 0.265    | 38 | 0.919    | 0.498 | 0.387    | 10 |
| 2                                                | 0.977        | 0.347 | 0.265    | 38 | 0.890    | 0.579 | 0.338    | 10 |
| 3                                                | 0.974        | 0.382 | 0.293    | 38 | 0.988    | 0.324 | 0.274    | 10 |
| 4                                                | 0.965        | 0.363 | 0.261    | 39 | 0.987    | 0.432 | 0.339    | 9  |
| 5                                                | 0.976        | 0.327 | 0.256    | 39 | 0.943    | 0.646 | 0.505    | 9  |
| QM B3LYP 6-31G*/MPA/FROG2 NO-OPT $R^2=0.911$     |              |       |          |    |          |       |          |    |
| 1                                                | 0.929        | 0.621 | 0.549    | 38 | 0.829    | 0.900 | 0.721    | 10 |
| 2                                                | 0.918        | 0.650 | 0.524    | 38 | 0.749    | 0.922 | 0.716    | 10 |
| 3                                                | 0.923        | 0.655 | 0.551    | 38 | 0.867    | 0.743 | 0.632    | 10 |
| 4                                                | 0.878        | 0.676 | 0.535    | 39 | 0.965    | 0.632 | 0.592    | 9  |
| 5                                                | 0.925        | 0.578 | 0.485    | 39 | 0.916    | 1.079 | 0.866    | 9  |
| QM B3LYP 6-31G*/MPA/FROG2 QM-OPT $R^2=0.973$     |              |       |          |    |          |       |          |    |
| 1                                                | 0.982        | 0.312 | 0.245    | 38 | 0.908    | 0.540 | 0.423    | 10 |
| 2                                                | 0.973        | 0.372 | 0.273    | 38 | 0.927    | 0.483 | 0.342    | 10 |
| 3                                                | 0.972        | 0.397 | 0.293    | 38 | 0.989    | 0.224 | 0.198    | 10 |
| 4                                                | 0.964        | 0.368 | 0.262    | 39 | 0.975    | 0.799 | 0.559    | 9  |
| 5                                                | 0.980        | 0.297 | 0.231    | 39 | 0.803    | 1.088 | 0.737    | 9  |
| QM B3LYP 6-31G*/MPA/NCI MM-OPT $R^2=0.955$       |              |       |          |    |          |       |          |    |
| 1                                                | 0.960        | 0.466 | 0.299    | 38 | 0.911    | 0.480 | 0.378    | 10 |
| 2                                                | 0.963        | 0.435 | 0.279    | 38 | 0.644    | 1.039 | 0.494    | 10 |
| 3                                                | 0.953        | 0.513 | 0.353    | 38 | 0.978    | 0.225 | 0.188    | 10 |
| 4                                                | 0.936        | 0.491 | 0.336    | 39 | 0.985    | 0.460 | 0.379    | 9  |
| 5                                                | 0.976        | 0.326 | 0.256    | 39 | 0.868    | 0.889 | 0.606    | 9  |
| QM B3LYP 6-31G*/MPA/NCI NO-OPT $R^2=0.970$       |              |       |          |    |          |       |          |    |
| 1                                                | 0.984        | 0.291 | 0.228    | 38 | 0.829    | 0.740 | 0.465    | 10 |
| 2                                                | 0.970        | 0.392 | 0.279    | 38 | 0.899    | 0.584 | 0.419    | 10 |
| 3                                                | 0.970        | 0.408 | 0.299    | 38 | 0.971    | 0.314 | 0.267    | 10 |
| 4                                                | 0.968        | 0.345 | 0.240    | 39 | 0.998    | 1.405 | 0.556    | 9  |
| 5                                                | 0.978        | 0.310 | 0.251    | 39 | 0.966    | 0.724 | 0.474    | 9  |
| QM B3LYP 6-31G*/MPA/NCI QM-OPT $R^2=0.959$       |              |       |          |    |          |       |          |    |
| 1                                                | 0.968        | 0.415 | 0.278    | 38 | 0.890    | 0.619 | 0.495    | 10 |
| 2                                                | 0.957        | 0.470 | 0.354    | 38 | 0.933    | 0.497 | 0.432    | 10 |
| 3                                                | 0.959        | 0.479 | 0.348    | 38 | 0.964    | 0.351 | 0.299    | 10 |
| 4                                                | 0.941        | 0.470 | 0.338    | 39 | 0.992    | 0.450 | 0.394    | 9  |
| 5                                                | 0.980        | 0.302 | 0.231    | 39 | 0.877    | 0.900 | 0.632    | 9  |
| QM B3LYP 6-31G*/MPA/OPENBABEL MM-OPT $R^2=0.975$ |              |       |          |    |          |       |          |    |
| 1                                                | 0.984        | 0.298 | 0.244    | 38 | 0.915    | 0.507 | 0.372    | 10 |
| 2                                                | 0.978        | 0.335 | 0.251    | 38 | 0.902    | 0.548 | 0.321    | 10 |
| 3                                                | 0.976        | 0.367 | 0.270    | 38 | 0.988    | 0.295 | 0.265    | 10 |
| 4                                                | 0.965        | 0.365 | 0.263    | 39 | 0.994    | 0.311 | 0.258    | 9  |
| 5                                                | 0.978        | 0.310 | 0.242    | 39 | 0.956    | 0.605 | 0.468    | 9  |
| QM B3LYP 6-31G*/MPA/OPENBABEL NO-OPT $R^2=0.973$ |              |       |          |    |          |       |          |    |
| 1                                                | 0.979        | 0.340 | 0.256    | 38 | 0.936    | 0.444 | 0.278    | 10 |
| 2                                                | 0.974        | 0.368 | 0.264    | 38 | 0.937    | 0.425 | 0.303    | 10 |
| 3                                                | 0.978        | 0.354 | 0.254    | 38 | 0.954    | 0.457 | 0.354    | 10 |
| 4                                                | 0.963        | 0.375 | 0.257    | 39 | 0.992    | 0.350 | 0.275    | 9  |
| 5                                                | 0.979        | 0.305 | 0.232    | 39 | 0.918    | 0.745 | 0.559    | 9  |
| QM B3LYP 6-31G*/MPA/OPENBABEL QM-OPT $R^2=0.974$ |              |       |          |    |          |       |          |    |
| 1                                                | 0.983        | 0.302 | 0.238    | 38 | 0.913    | 0.539 | 0.442    | 10 |
| 2                                                | 0.978        | 0.338 | 0.240    | 38 | 0.867    | 0.684 | 0.500    | 10 |
| 3                                                | 0.973        | 0.389 | 0.293    | 38 | 0.989    | 0.205 | 0.174    | 10 |
| 4                                                | 0.964        | 0.367 | 0.262    | 39 | 0.995    | 0.617 | 0.404    | 9  |
| 5                                                | 0.982        | 0.285 | 0.227    | 39 | 0.765    | 1.209 | 0.787    | 9  |
| QM B3LYP 6-31G*/MPA/PUBCHEM MM-OPT $R^2=0.979$   |              |       |          |    |          |       |          |    |
| 1                                                | 0.982        | 0.313 | 0.256    | 38 | 0.948    | 0.360 | 0.270    | 10 |

Table S5: Cross-validation results.

| Fold                                           | Training set |       |          |    | Test set |       |          |    |
|------------------------------------------------|--------------|-------|----------|----|----------|-------|----------|----|
|                                                | $R^2$        | RMSE  | $\Delta$ | N  | $Q^2$    | RMSE  | $\Delta$ | N  |
| 2                                              | 0.983        | 0.300 | 0.230    | 38 | 0.915    | 0.506 | 0.354    | 10 |
| 3                                              | 0.981        | 0.324 | 0.253    | 38 | 0.987    | 0.365 | 0.314    | 10 |
| 4                                              | 0.972        | 0.322 | 0.262    | 39 | 0.991    | 0.399 | 0.332    | 9  |
| 5                                              | 0.982        | 0.287 | 0.240    | 39 | 0.987    | 0.502 | 0.375    | 9  |
| QM B3LYP 6-31G*/MPA/PUBCHEM NO-OPT $R^2=0.939$ |              |       |          |    |          |       |          |    |
| 1                                              | 0.954        | 0.499 | 0.355    | 38 | 0.797    | 0.718 | 0.645    | 10 |
| 2                                              | 0.940        | 0.556 | 0.435    | 38 | 0.697    | 0.974 | 0.697    | 10 |
| 3                                              | 0.940        | 0.581 | 0.445    | 38 | 0.941    | 0.401 | 0.343    | 10 |
| 4                                              | 0.911        | 0.576 | 0.451    | 39 | 0.993    | 0.553 | 0.413    | 9  |
| 5                                              | 0.963        | 0.408 | 0.306    | 39 | 0.895    | 1.045 | 0.772    | 9  |
| QM B3LYP 6-31G*/MPA/PUBCHEM QM-OPT $R^2=0.974$ |              |       |          |    |          |       |          |    |
| 1                                              | 0.982        | 0.311 | 0.249    | 38 | 0.896    | 0.519 | 0.428    | 10 |
| 2                                              | 0.978        | 0.336 | 0.258    | 38 | 0.901    | 0.585 | 0.449    | 10 |
| 3                                              | 0.974        | 0.380 | 0.290    | 38 | 0.963    | 0.296 | 0.239    | 10 |
| 4                                              | 0.960        | 0.388 | 0.305    | 39 | 0.996    | 0.257 | 0.215    | 9  |
| 5                                              | 0.978        | 0.314 | 0.249    | 39 | 0.964    | 0.751 | 0.571    | 9  |
| QM B3LYP 6-31G*/MPA/RDKit MM-OPT $R^2=0.979$   |              |       |          |    |          |       |          |    |
| 1                                              | 0.980        | 0.328 | 0.261    | 38 | 0.962    | 0.300 | 0.239    | 10 |
| 2                                              | 0.983        | 0.295 | 0.220    | 38 | 0.884    | 0.584 | 0.443    | 10 |
| 3                                              | 0.981        | 0.326 | 0.262    | 38 | 0.964    | 0.327 | 0.257    | 10 |
| 4                                              | 0.973        | 0.318 | 0.246    | 39 | 0.994    | 0.382 | 0.323    | 9  |
| 5                                              | 0.988        | 0.229 | 0.191    | 39 | 0.926    | 0.674 | 0.521    | 9  |
| QM B3LYP 6-31G*/MPA/RDKit QM-OPT $R^2=0.964$   |              |       |          |    |          |       |          |    |
| 1                                              | 0.973        | 0.381 | 0.290    | 38 | 0.880    | 0.642 | 0.467    | 10 |
| 2                                              | 0.961        | 0.447 | 0.319    | 38 | 0.938    | 0.477 | 0.323    | 10 |
| 3                                              | 0.962        | 0.463 | 0.331    | 38 | 0.985    | 0.206 | 0.189    | 10 |
| 4                                              | 0.951        | 0.429 | 0.296    | 39 | 0.993    | 0.540 | 0.408    | 9  |
| 5                                              | 0.983        | 0.279 | 0.212    | 39 | 0.887    | 0.868 | 0.634    | 9  |
| QM B3LYP 6-31G*/MPA/RDKit MM-OPT $R^2=0.976$   |              |       |          |    |          |       |          |    |
| 1                                              | 0.984        | 0.292 | 0.236    | 38 | 0.913    | 0.522 | 0.384    | 10 |
| 2                                              | 0.979        | 0.330 | 0.242    | 38 | 0.896    | 0.563 | 0.332    | 10 |
| 3                                              | 0.976        | 0.363 | 0.260    | 38 | 0.986    | 0.310 | 0.283    | 10 |
| 4                                              | 0.964        | 0.366 | 0.265    | 39 | 0.995    | 0.305 | 0.261    | 9  |
| 5                                              | 0.978        | 0.314 | 0.249    | 39 | 0.975    | 0.562 | 0.402    | 9  |
| QM B3LYP 6-31G*/MPA/RDKit NO-OPT $R^2=0.816$   |              |       |          |    |          |       |          |    |
| 1                                              | 0.822        | 0.981 | 0.855    | 38 | 0.866    | 0.954 | 0.730    | 10 |
| 2                                              | 0.867        | 0.829 | 0.677    | 38 | 0.512    | 1.531 | 1.308    | 10 |
| 3                                              | 0.834        | 0.964 | 0.833    | 38 | 0.649    | 0.923 | 0.768    | 10 |
| 4                                              | 0.770        | 0.929 | 0.783    | 39 | 0.910    | 1.260 | 0.983    | 9  |
| 5                                              | 0.825        | 0.883 | 0.761    | 39 | 0.690    | 1.386 | 1.139    | 9  |
| QM B3LYP 6-31G*/NPA/BALLOON MM-OPT $R^2=0.927$ |              |       |          |    |          |       |          |    |
| 1                                              | 0.940        | 0.570 | 0.439    | 38 | 0.821    | 0.778 | 0.603    | 10 |
| 2                                              | 0.973        | 0.374 | 0.264    | 38 | 0.350    | 2.478 | 1.088    | 10 |
| 3                                              | 0.924        | 0.651 | 0.516    | 38 | 0.957    | 0.353 | 0.281    | 10 |
| 4                                              | 0.933        | 0.500 | 0.378    | 39 | 0.974    | 1.289 | 0.908    | 9  |
| 5                                              | 0.936        | 0.536 | 0.441    | 39 | 0.941    | 0.901 | 0.593    | 9  |
| QM B3LYP 6-31G*/NPA/BALLOON NO-OPT $R^2=0.912$ |              |       |          |    |          |       |          |    |
| 1                                              | 0.932        | 0.607 | 0.480    | 38 | 0.828    | 0.886 | 0.779    | 10 |
| 2                                              | 0.930        | 0.602 | 0.438    | 38 | 0.658    | 1.021 | 0.851    | 10 |
| 3                                              | 0.916        | 0.685 | 0.560    | 38 | 0.896    | 0.575 | 0.455    | 10 |
| 4                                              | 0.875        | 0.685 | 0.545    | 39 | 0.992    | 0.622 | 0.554    | 9  |
| 5                                              | 0.915        | 0.618 | 0.526    | 39 | 0.917    | 0.884 | 0.647    | 9  |
| QM B3LYP 6-31G*/NPA/BALLOON QM-OPT $R^2=0.933$ |              |       |          |    |          |       |          |    |
| 1                                              | 0.934        | 0.598 | 0.444    | 38 | 0.936    | 0.513 | 0.378    | 10 |
| 2                                              | 0.974        | 0.369 | 0.289    | 38 | 0.608    | 1.245 | 0.918    | 10 |
| 3                                              | 0.935        | 0.603 | 0.461    | 38 | 0.952    | 0.489 | 0.370    | 10 |
| 4                                              | 0.938        | 0.480 | 0.362    | 39 | 0.985    | 2.459 | 1.474    | 9  |
| 5                                              | 0.926        | 0.575 | 0.449    | 39 | 0.959    | 0.739 | 0.509    | 9  |
| QM B3LYP 6-31G*/NPA/FROG2 MM-OPT $R^2=0.965$   |              |       |          |    |          |       |          |    |

Table S5: Cross-validation results.

| Fold                                             | Training set |       |          |    | Test set |       |          |    |
|--------------------------------------------------|--------------|-------|----------|----|----------|-------|----------|----|
|                                                  | $R^2$        | RMSE  | $\Delta$ | N  | $Q^2$    | RMSE  | $\Delta$ | N  |
| 1                                                | 0.970        | 0.403 | 0.303    | 38 | 0.915    | 0.480 | 0.387    | 10 |
| 2                                                | 0.965        | 0.425 | 0.323    | 38 | 0.933    | 0.456 | 0.314    | 10 |
| 3                                                | 0.964        | 0.448 | 0.347    | 38 | 0.971    | 0.266 | 0.235    | 10 |
| 4                                                | 0.971        | 0.328 | 0.250    | 39 | 0.981    | 0.782 | 0.557    | 9  |
| 5                                                | 0.970        | 0.369 | 0.286    | 39 | 0.927    | 0.777 | 0.482    | 9  |
| QM B3LYP 6-31G*/NPA/FROG2 NO-OPT $R^2=0.924$     |              |       |          |    |          |       |          |    |
| 1                                                | 0.934        | 0.598 | 0.489    | 38 | 0.837    | 0.728 | 0.654    | 10 |
| 2                                                | 0.934        | 0.584 | 0.467    | 38 | 0.729    | 0.881 | 0.711    | 10 |
| 3                                                | 0.939        | 0.585 | 0.471    | 38 | 0.850    | 0.800 | 0.678    | 10 |
| 4                                                | 0.884        | 0.660 | 0.550    | 39 | 0.989    | 0.427 | 0.362    | 9  |
| 5                                                | 0.937        | 0.532 | 0.435    | 39 | 0.889    | 0.952 | 0.720    | 9  |
| QM B3LYP 6-31G*/NPA/FROG2 QM-OPT $R^2=0.911$     |              |       |          |    |          |       |          |    |
| 1                                                | 0.914        | 0.682 | 0.541    | 38 | 0.895    | 0.617 | 0.485    | 10 |
| 2                                                | 0.935        | 0.577 | 0.447    | 38 | 0.633    | 1.128 | 0.712    | 10 |
| 3                                                | 0.909        | 0.714 | 0.574    | 38 | 0.942    | 0.424 | 0.365    | 10 |
| 4                                                | 0.926        | 0.527 | 0.424    | 39 | 0.987    | 2.015 | 1.274    | 9  |
| 5                                                | 0.915        | 0.617 | 0.492    | 39 | 0.486    | 2.163 | 1.130    | 9  |
| QM B3LYP 6-31G*/NPA/NCI MM-OPT $R^2=0.967$       |              |       |          |    |          |       |          |    |
| 1                                                | 0.970        | 0.400 | 0.316    | 38 | 0.908    | 0.443 | 0.356    | 10 |
| 2                                                | 0.979        | 0.326 | 0.247    | 38 | 0.784    | 0.815 | 0.479    | 10 |
| 3                                                | 0.970        | 0.411 | 0.326    | 38 | 0.935    | 0.410 | 0.357    | 10 |
| 4                                                | 0.956        | 0.406 | 0.330    | 39 | 0.982    | 0.442 | 0.394    | 9  |
| 5                                                | 0.969        | 0.373 | 0.298    | 39 | 0.949    | 0.554 | 0.408    | 9  |
| QM B3LYP 6-31G*/NPA/NCI NO-OPT $R^2=0.966$       |              |       |          |    |          |       |          |    |
| 1                                                | 0.972        | 0.390 | 0.268    | 38 | 0.859    | 0.558 | 0.471    | 10 |
| 2                                                | 0.982        | 0.303 | 0.245    | 38 | 0.741    | 0.888 | 0.538    | 10 |
| 3                                                | 0.967        | 0.427 | 0.307    | 38 | 0.952    | 0.339 | 0.196    | 10 |
| 4                                                | 0.962        | 0.378 | 0.290    | 39 | 0.996    | 1.101 | 0.574    | 9  |
| 5                                                | 0.963        | 0.409 | 0.285    | 39 | 0.968    | 0.456 | 0.359    | 9  |
| QM B3LYP 6-31G*/NPA/NCI QM-OPT $R^2=0.937$       |              |       |          |    |          |       |          |    |
| 1                                                | 0.935        | 0.591 | 0.439    | 38 | 0.915    | 0.456 | 0.400    | 10 |
| 2                                                | 0.981        | 0.313 | 0.242    | 38 | 0.561    | 1.284 | 0.828    | 10 |
| 3                                                | 0.941        | 0.573 | 0.407    | 38 | 0.920    | 0.519 | 0.447    | 10 |
| 4                                                | 0.913        | 0.571 | 0.433    | 39 | 0.990    | 0.588 | 0.510    | 9  |
| 5                                                | 0.923        | 0.587 | 0.434    | 39 | 0.974    | 0.426 | 0.303    | 9  |
| QM B3LYP 6-31G*/NPA/OPENBABEL MM-OPT $R^2=0.967$ |              |       |          |    |          |       |          |    |
| 1                                                | 0.973        | 0.380 | 0.282    | 38 | 0.910    | 0.500 | 0.402    | 10 |
| 2                                                | 0.967        | 0.414 | 0.312    | 38 | 0.942    | 0.423 | 0.298    | 10 |
| 3                                                | 0.967        | 0.429 | 0.334    | 38 | 0.966    | 0.283 | 0.227    | 10 |
| 4                                                | 0.969        | 0.341 | 0.262    | 39 | 0.986    | 0.710 | 0.501    | 9  |
| 5                                                | 0.971        | 0.357 | 0.273    | 39 | 0.939    | 0.729 | 0.464    | 9  |
| QM B3LYP 6-31G*/NPA/OPENBABEL NO-OPT $R^2=0.966$ |              |       |          |    |          |       |          |    |
| 1                                                | 0.968        | 0.419 | 0.307    | 38 | 0.937    | 0.387 | 0.251    | 10 |
| 2                                                | 0.965        | 0.425 | 0.305    | 38 | 0.925    | 0.457 | 0.319    | 10 |
| 3                                                | 0.974        | 0.385 | 0.287    | 38 | 0.910    | 0.528 | 0.363    | 10 |
| 4                                                | 0.963        | 0.374 | 0.263    | 39 | 0.988    | 0.615 | 0.408    | 9  |
| 5                                                | 0.970        | 0.368 | 0.266    | 39 | 0.932    | 0.762 | 0.476    | 9  |
| QM B3LYP 6-31G*/NPA/OPENBABEL QM-OPT $R^2=0.928$ |              |       |          |    |          |       |          |    |
| 1                                                | 0.936        | 0.587 | 0.442    | 38 | 0.919    | 0.676 | 0.468    | 10 |
| 2                                                | 0.959        | 0.458 | 0.355    | 38 | 0.622    | 1.192 | 0.771    | 10 |
| 3                                                | 0.928        | 0.636 | 0.503    | 38 | 0.948    | 0.424 | 0.373    | 10 |
| 4                                                | 0.927        | 0.524 | 0.411    | 39 | 0.992    | 2.062 | 1.255    | 9  |
| 5                                                | 0.928        | 0.569 | 0.459    | 39 | 0.930    | 0.820 | 0.592    | 9  |
| QM B3LYP 6-31G*/NPA/PUBCHEM MM-OPT $R^2=0.966$   |              |       |          |    |          |       |          |    |
| 1                                                | 0.977        | 0.354 | 0.285    | 38 | 0.842    | 0.630 | 0.598    | 10 |
| 2                                                | 0.970        | 0.391 | 0.324    | 38 | 0.925    | 0.499 | 0.383    | 10 |
| 3                                                | 0.968        | 0.426 | 0.364    | 38 | 0.946    | 0.361 | 0.318    | 10 |
| 4                                                | 0.955        | 0.410 | 0.337    | 39 | 0.988    | 0.470 | 0.416    | 9  |
| 5                                                | 0.969        | 0.369 | 0.291    | 39 | 0.929    | 0.753 | 0.462    | 9  |

Table S5: Cross-validation results.

| Fold                                           | Training set |       |          |    | Test set |       |          |    |
|------------------------------------------------|--------------|-------|----------|----|----------|-------|----------|----|
|                                                | $R^2$        | RMSE  | $\Delta$ | N  | $Q^2$    | RMSE  | $\Delta$ | N  |
| QM B3LYP 6-31G*/NPA/PUBCHEM NO-OPT $R^2=0.921$ |              |       |          |    |          |       |          |    |
| 1                                              | 0.925        | 0.638 | 0.441    | 38 | 0.857    | 0.587 | 0.466    | 10 |
| 2                                              | 0.921        | 0.638 | 0.474    | 38 | 0.850    | 0.669 | 0.500    | 10 |
| 3                                              | 0.923        | 0.656 | 0.461    | 38 | 0.904    | 0.532 | 0.431    | 10 |
| 4                                              | 0.917        | 0.559 | 0.418    | 39 | 0.989    | 1.401 | 0.821    | 9  |
| 5                                              | 0.956        | 0.444 | 0.323    | 39 | 0.830    | 1.296 | 0.891    | 9  |
| QM B3LYP 6-31G*/NPA/PUBCHEM QM-OPT $R^2=0.885$ |              |       |          |    |          |       |          |    |
| 1                                              | 0.900        | 0.735 | 0.555    | 38 | 0.677    | 0.840 | 0.594    | 10 |
| 2                                              | 0.887        | 0.764 | 0.562    | 38 | 0.759    | 0.825 | 0.692    | 10 |
| 3                                              | 0.900        | 0.748 | 0.557    | 38 | 0.734    | 0.767 | 0.592    | 10 |
| 4                                              | 0.841        | 0.772 | 0.593    | 39 | 0.987    | 0.749 | 0.600    | 9  |
| 5                                              | 0.943        | 0.503 | 0.398    | 39 | 0.258    | 3.322 | 1.590    | 9  |
| QM B3LYP 6-31G*/NPA/RDKIT MM-OPT $R^2=0.973$   |              |       |          |    |          |       |          |    |
| 1                                              | 0.980        | 0.327 | 0.259    | 38 | 0.902    | 0.543 | 0.465    | 10 |
| 2                                              | 0.982        | 0.303 | 0.246    | 38 | 0.763    | 0.815 | 0.510    | 10 |
| 3                                              | 0.974        | 0.383 | 0.300    | 38 | 0.972    | 0.290 | 0.246    | 10 |
| 4                                              | 0.967        | 0.350 | 0.288    | 39 | 0.985    | 0.488 | 0.364    | 9  |
| 5                                              | 0.976        | 0.329 | 0.256    | 39 | 0.938    | 0.625 | 0.521    | 9  |
| QM B3LYP 6-31G*/NPA/RDKIT QM-OPT $R^2=0.927$   |              |       |          |    |          |       |          |    |
| 1                                              | 0.929        | 0.618 | 0.480    | 38 | 0.911    | 0.561 | 0.435    | 10 |
| 2                                              | 0.969        | 0.402 | 0.313    | 38 | 0.577    | 1.272 | 0.906    | 10 |
| 3                                              | 0.931        | 0.623 | 0.495    | 38 | 0.893    | 0.565 | 0.485    | 10 |
| 4                                              | 0.930        | 0.511 | 0.408    | 39 | 0.985    | 2.500 | 1.435    | 9  |
| 5                                              | 0.914        | 0.621 | 0.499    | 39 | 0.977    | 0.564 | 0.434    | 9  |
| QM B3LYP 6-31G*/NPA/RDKIT MM-OPT $R^2=0.967$   |              |       |          |    |          |       |          |    |
| 1                                              | 0.973        | 0.381 | 0.282    | 38 | 0.912    | 0.515 | 0.419    | 10 |
| 2                                              | 0.967        | 0.413 | 0.311    | 38 | 0.940    | 0.432 | 0.308    | 10 |
| 3                                              | 0.968        | 0.424 | 0.326    | 38 | 0.955    | 0.323 | 0.245    | 10 |
| 4                                              | 0.967        | 0.353 | 0.271    | 39 | 0.987    | 0.681 | 0.487    | 9  |
| 5                                              | 0.971        | 0.362 | 0.281    | 39 | 0.944    | 0.698 | 0.442    | 9  |
| QM B3LYP 6-31G*/NPA/RDKIT NO-OPT $R^2=0.851$   |              |       |          |    |          |       |          |    |
| 1                                              | 0.868        | 0.845 | 0.660    | 38 | 0.737    | 0.946 | 0.811    | 10 |
| 2                                              | 0.872        | 0.813 | 0.685    | 38 | 0.691    | 1.111 | 0.910    | 10 |
| 3                                              | 0.867        | 0.864 | 0.713    | 38 | 0.716    | 0.954 | 0.772    | 10 |
| 4                                              | 0.815        | 0.834 | 0.690    | 39 | 0.913    | 1.052 | 0.941    | 9  |
| 5                                              | 0.850        | 0.818 | 0.674    | 39 | 0.795    | 1.137 | 0.935    | 9  |
| QM HF STO-3G/MPA/BALLOON MM-OPT $R^2=0.874$    |              |       |          |    |          |       |          |    |
| 1                                              | 0.872        | 0.831 | 0.649    | 38 | 0.858    | 0.662 | 0.563    | 10 |
| 2                                              | 0.973        | 0.377 | 0.283    | 38 | 0.442    | 2.008 | 0.933    | 10 |
| 3                                              | 0.874        | 0.839 | 0.638    | 38 | 0.864    | 0.578 | 0.530    | 10 |
| 4                                              | 0.825        | 0.811 | 0.627    | 39 | 0.993    | 0.855 | 0.806    | 9  |
| 5                                              | 0.858        | 0.796 | 0.628    | 39 | 0.942    | 0.963 | 0.748    | 9  |
| QM HF STO-3G/MPA/BALLOON NO-OPT $R^2=0.836$    |              |       |          |    |          |       |          |    |
| 1                                              | 0.841        | 0.927 | 0.751    | 38 | 0.792    | 0.801 | 0.623    | 10 |
| 2                                              | 0.888        | 0.759 | 0.583    | 38 | 0.305    | 1.721 | 1.370    | 10 |
| 3                                              | 0.859        | 0.888 | 0.704    | 38 | 0.634    | 0.935 | 0.753    | 10 |
| 4                                              | 0.776        | 0.917 | 0.765    | 39 | 0.948    | 0.905 | 0.737    | 9  |
| 5                                              | 0.836        | 0.856 | 0.685    | 39 | 0.760    | 1.216 | 0.969    | 9  |
| QM HF STO-3G/MPA/BALLOON QM-OPT $R^2=0.948$    |              |       |          |    |          |       |          |    |
| 1                                              | 0.952        | 0.508 | 0.391    | 38 | 0.892    | 0.545 | 0.505    | 10 |
| 2                                              | 0.972        | 0.378 | 0.274    | 38 | 0.636    | 1.152 | 0.872    | 10 |
| 3                                              | 0.954        | 0.506 | 0.402    | 38 | 0.915    | 0.520 | 0.366    | 10 |
| 4                                              | 0.939        | 0.480 | 0.380    | 39 | 0.984    | 0.909 | 0.713    | 9  |
| 5                                              | 0.948        | 0.484 | 0.389    | 39 | 0.958    | 0.860 | 0.740    | 9  |
| QM HF STO-3G/MPA/FROG2 MM-OPT $R^2=0.958$      |              |       |          |    |          |       |          |    |
| 1                                              | 0.963        | 0.447 | 0.361    | 38 | 0.905    | 0.500 | 0.428    | 10 |
| 2                                              | 0.963        | 0.436 | 0.355    | 38 | 0.873    | 0.656 | 0.446    | 10 |
| 3                                              | 0.963        | 0.452 | 0.356    | 38 | 0.942    | 0.546 | 0.461    | 10 |
| 4                                              | 0.951        | 0.430 | 0.340    | 39 | 0.990    | 0.761 | 0.558    | 9  |

Table S5: Cross-validation results.

| Fold                                          | Training set |       |          |    | Test set |       |          |    |
|-----------------------------------------------|--------------|-------|----------|----|----------|-------|----------|----|
|                                               | $R^2$        | RMSE  | $\Delta$ | N  | $Q^2$    | RMSE  | $\Delta$ | N  |
| 5                                             | 0.960        | 0.421 | 0.331    | 39 | 0.968    | 0.676 | 0.507    | 9  |
| QM HF STO-3G/MPA/FROG2 NO-OPT $R^2=0.934$     |              |       |          |    |          |       |          |    |
| 1                                             | 0.941        | 0.565 | 0.445    | 38 | 0.863    | 0.668 | 0.633    | 10 |
| 2                                             | 0.950        | 0.506 | 0.395    | 38 | 0.672    | 0.977 | 0.840    | 10 |
| 3                                             | 0.944        | 0.561 | 0.450    | 38 | 0.870    | 0.654 | 0.501    | 10 |
| 4                                             | 0.903        | 0.603 | 0.505    | 39 | 0.988    | 0.474 | 0.413    | 9  |
| 5                                             | 0.945        | 0.496 | 0.397    | 39 | 0.891    | 0.929 | 0.744    | 9  |
| QM HF STO-3G/MPA/FROG2 QM-OPT $R^2=0.875$     |              |       |          |    |          |       |          |    |
| 1                                             | 0.876        | 0.818 | 0.702    | 38 | 0.840    | 0.690 | 0.644    | 10 |
| 2                                             | 0.903        | 0.708 | 0.588    | 38 | 0.581    | 1.213 | 1.054    | 10 |
| 3                                             | 0.889        | 0.787 | 0.661    | 38 | 0.743    | 0.837 | 0.721    | 10 |
| 4                                             | 0.920        | 0.548 | 0.445    | 39 | 0.990    | 3.452 | 1.678    | 9  |
| 5                                             | 0.933        | 0.549 | 0.415    | 39 | 0.410    | 2.830 | 1.285    | 9  |
| QM HF STO-3G/MPA/NCI MM-OPT $R^2=0.954$       |              |       |          |    |          |       |          |    |
| 1                                             | 0.960        | 0.464 | 0.349    | 38 | 0.907    | 0.581 | 0.470    | 10 |
| 2                                             | 0.971        | 0.386 | 0.288    | 38 | 0.751    | 0.912 | 0.602    | 10 |
| 3                                             | 0.959        | 0.480 | 0.357    | 38 | 0.930    | 0.485 | 0.366    | 10 |
| 4                                             | 0.938        | 0.481 | 0.357    | 39 | 0.988    | 0.549 | 0.449    | 9  |
| 5                                             | 0.956        | 0.445 | 0.356    | 39 | 0.940    | 0.624 | 0.476    | 9  |
| QM HF STO-3G/MPA/NCI NO-OPT $R^2=0.951$       |              |       |          |    |          |       |          |    |
| 1                                             | 0.961        | 0.462 | 0.341    | 38 | 0.804    | 0.717 | 0.579    | 10 |
| 2                                             | 0.969        | 0.397 | 0.306    | 38 | 0.570    | 1.136 | 0.763    | 10 |
| 3                                             | 0.957        | 0.490 | 0.364    | 38 | 0.896    | 0.504 | 0.421    | 10 |
| 4                                             | 0.930        | 0.513 | 0.407    | 39 | 0.995    | 0.602 | 0.412    | 9  |
| 5                                             | 0.962        | 0.412 | 0.307    | 39 | 0.896    | 0.835 | 0.670    | 9  |
| QM HF STO-3G/MPA/NCI QM-OPT $R^2=0.942$       |              |       |          |    |          |       |          |    |
| 1                                             | 0.949        | 0.523 | 0.423    | 38 | 0.849    | 0.693 | 0.603    | 10 |
| 2                                             | 0.967        | 0.412 | 0.305    | 38 | 0.658    | 1.051 | 0.786    | 10 |
| 3                                             | 0.949        | 0.532 | 0.418    | 38 | 0.888    | 0.559 | 0.495    | 10 |
| 4                                             | 0.923        | 0.538 | 0.415    | 39 | 0.980    | 0.624 | 0.501    | 9  |
| 5                                             | 0.935        | 0.539 | 0.439    | 39 | 0.964    | 0.567 | 0.469    | 9  |
| QM HF STO-3G/MPA/OPENBABEL MM-OPT $R^2=0.958$ |              |       |          |    |          |       |          |    |
| 1                                             | 0.963        | 0.448 | 0.357    | 38 | 0.908    | 0.508 | 0.429    | 10 |
| 2                                             | 0.963        | 0.437 | 0.356    | 38 | 0.875    | 0.663 | 0.448    | 10 |
| 3                                             | 0.963        | 0.457 | 0.355    | 38 | 0.949    | 0.531 | 0.451    | 10 |
| 4                                             | 0.953        | 0.421 | 0.330    | 39 | 0.989    | 0.798 | 0.588    | 9  |
| 5                                             | 0.961        | 0.416 | 0.326    | 39 | 0.960    | 0.710 | 0.518    | 9  |
| QM HF STO-3G/MPA/OPENBABEL NO-OPT $R^2=0.952$ |              |       |          |    |          |       |          |    |
| 1                                             | 0.957        | 0.483 | 0.372    | 38 | 0.918    | 0.543 | 0.467    | 10 |
| 2                                             | 0.955        | 0.484 | 0.369    | 38 | 0.873    | 0.642 | 0.412    | 10 |
| 3                                             | 0.965        | 0.439 | 0.334    | 38 | 0.889    | 0.712 | 0.522    | 10 |
| 4                                             | 0.943        | 0.462 | 0.335    | 39 | 0.988    | 0.740 | 0.589    | 9  |
| 5                                             | 0.955        | 0.448 | 0.335    | 39 | 0.959    | 0.751 | 0.570    | 9  |
| QM HF STO-3G/MPA/OPENBABEL QM-OPT $R^2=0.874$ |              |       |          |    |          |       |          |    |
| 1                                             | 0.875        | 0.823 | 0.704    | 38 | 0.846    | 0.702 | 0.665    | 10 |
| 2                                             | 0.918        | 0.650 | 0.528    | 38 | 0.469    | 1.631 | 1.327    | 10 |
| 3                                             | 0.886        | 0.799 | 0.677    | 38 | 0.768    | 0.819 | 0.694    | 10 |
| 4                                             | 0.923        | 0.539 | 0.427    | 39 | 0.989    | 3.419 | 1.751    | 9  |
| 5                                             | 0.947        | 0.485 | 0.372    | 39 | 0.357    | 3.552 | 1.738    | 9  |
| QM HF STO-3G/MPA/PUBCHEM MM-OPT $R^2=0.942$   |              |       |          |    |          |       |          |    |
| 1                                             | 0.947        | 0.537 | 0.408    | 38 | 0.912    | 0.601 | 0.470    | 10 |
| 2                                             | 0.945        | 0.533 | 0.398    | 38 | 0.811    | 0.819 | 0.661    | 10 |
| 3                                             | 0.950        | 0.529 | 0.385    | 38 | 0.867    | 0.598 | 0.423    | 10 |
| 4                                             | 0.932        | 0.507 | 0.356    | 39 | 0.963    | 0.711 | 0.571    | 9  |
| 5                                             | 0.960        | 0.424 | 0.351    | 39 | 0.898    | 1.014 | 0.675    | 9  |
| QM HF STO-3G/MPA/PUBCHEM NO-OPT $R^2=0.938$   |              |       |          |    |          |       |          |    |
| 1                                             | 0.945        | 0.546 | 0.387    | 38 | 0.854    | 0.569 | 0.463    | 10 |
| 2                                             | 0.939        | 0.560 | 0.421    | 38 | 0.843    | 0.648 | 0.475    | 10 |
| 3                                             | 0.948        | 0.540 | 0.393    | 38 | 0.850    | 0.587 | 0.433    | 10 |

Table S5: Cross-validation results.

| Fold                                                    | Training set |       |          |    | Test set |       |          |    |
|---------------------------------------------------------|--------------|-------|----------|----|----------|-------|----------|----|
|                                                         | $R^2$        | RMSE  | $\Delta$ | N  | $Q^2$    | RMSE  | $\Delta$ | N  |
| 4                                                       | 0.926        | 0.527 | 0.386    | 39 | 0.972    | 0.712 | 0.599    | 9  |
| 5                                                       | 0.938        | 0.528 | 0.394    | 39 | 0.949    | 0.702 | 0.482    | 9  |
| QM HF STO-3G/MPA/PUBCHEM QM-OPT $R^2=0.934$             |              |       |          |    |          |       |          |    |
| 1                                                       | 0.936        | 0.590 | 0.474    | 38 | 0.891    | 0.517 | 0.427    | 10 |
| 2                                                       | 0.939        | 0.560 | 0.439    | 38 | 0.756    | 0.830 | 0.584    | 10 |
| 3                                                       | 0.943        | 0.564 | 0.437    | 38 | 0.844    | 0.594 | 0.456    | 10 |
| 4                                                       | 0.933        | 0.503 | 0.409    | 39 | 0.979    | 0.912 | 0.683    | 9  |
| 5                                                       | 0.951        | 0.467 | 0.346    | 39 | 0.724    | 1.680 | 1.039    | 9  |
| QM HF STO-3G/MPA/RDKIT MM-OPT $R^2=0.965$               |              |       |          |    |          |       |          |    |
| 1                                                       | 0.968        | 0.414 | 0.327    | 38 | 0.914    | 0.438 | 0.380    | 10 |
| 2                                                       | 0.971        | 0.389 | 0.296    | 38 | 0.791    | 0.768 | 0.509    | 10 |
| 3                                                       | 0.967        | 0.433 | 0.343    | 38 | 0.946    | 0.347 | 0.280    | 10 |
| 4                                                       | 0.961        | 0.381 | 0.304    | 39 | 0.994    | 0.606 | 0.443    | 9  |
| 5                                                       | 0.972        | 0.352 | 0.290    | 39 | 0.958    | 0.723 | 0.537    | 9  |
| QM HF STO-3G/MPA/RDKIT QM-OPT $R^2=0.940$               |              |       |          |    |          |       |          |    |
| 1                                                       | 0.941        | 0.564 | 0.422    | 38 | 0.941    | 0.527 | 0.419    | 10 |
| 2                                                       | 0.966        | 0.418 | 0.315    | 38 | 0.659    | 1.063 | 0.760    | 10 |
| 3                                                       | 0.949        | 0.533 | 0.407    | 38 | 0.846    | 0.590 | 0.420    | 10 |
| 4                                                       | 0.931        | 0.508 | 0.393    | 39 | 0.979    | 1.591 | 0.955    | 9  |
| 5                                                       | 0.932        | 0.551 | 0.420    | 39 | 0.967    | 0.552 | 0.483    | 9  |
| QM HF STO-3G/MPA/RDKIT MM-OPT $R^2=0.959$               |              |       |          |    |          |       |          |    |
| 1                                                       | 0.964        | 0.438 | 0.353    | 38 | 0.903    | 0.526 | 0.455    | 10 |
| 2                                                       | 0.963        | 0.435 | 0.356    | 38 | 0.878    | 0.647 | 0.431    | 10 |
| 3                                                       | 0.966        | 0.438 | 0.336    | 38 | 0.937    | 0.586 | 0.505    | 10 |
| 4                                                       | 0.951        | 0.427 | 0.337    | 39 | 0.990    | 0.757 | 0.563    | 9  |
| 5                                                       | 0.961        | 0.420 | 0.334    | 39 | 0.971    | 0.659 | 0.496    | 9  |
| QM HF STO-3G/MPA/RDKIT NO-OPT $R^2=0.853$               |              |       |          |    |          |       |          |    |
| 1                                                       | 0.878        | 0.812 | 0.666    | 38 | 0.843    | 1.079 | 0.914    | 10 |
| 2                                                       | 0.904        | 0.704 | 0.570    | 38 | 0.381    | 1.500 | 1.172    | 10 |
| 3                                                       | 0.851        | 0.912 | 0.763    | 38 | 0.871    | 0.548 | 0.429    | 10 |
| 4                                                       | 0.814        | 0.836 | 0.661    | 39 | 0.936    | 1.017 | 0.901    | 9  |
| 5                                                       | 0.852        | 0.814 | 0.686    | 39 | 0.682    | 1.376 | 1.085    | 9  |
| Svob2007-chal2 HF STO-3G/MPA/BALLOON MM-OPT $R^2=0.867$ |              |       |          |    |          |       |          |    |
| 1                                                       | 0.882        | 0.800 | 0.600    | 38 | 0.666    | 0.945 | 0.740    | 10 |
| 2                                                       | 0.893        | 0.744 | 0.539    | 38 | 0.714    | 1.422 | 0.974    | 10 |
| 3                                                       | 0.878        | 0.827 | 0.613    | 38 | 0.778    | 0.757 | 0.600    | 10 |
| 4                                                       | 0.792        | 0.883 | 0.699    | 39 | 0.988    | 0.489 | 0.380    | 9  |
| 5                                                       | 0.897        | 0.677 | 0.549    | 39 | 0.745    | 1.246 | 0.947    | 9  |
| Svob2007-chal2 HF STO-3G/MPA/BALLOON NO-OPT $R^2=0.806$ |              |       |          |    |          |       |          |    |
| 1                                                       | 0.823        | 0.979 | 0.807    | 38 | 0.827    | 1.108 | 1.040    | 10 |
| 2                                                       | 0.822        | 0.959 | 0.763    | 38 | 0.762    | 1.226 | 0.980    | 10 |
| 3                                                       | 0.826        | 0.986 | 0.804    | 38 | 0.677    | 0.966 | 0.840    | 10 |
| 4                                                       | 0.748        | 0.972 | 0.772    | 39 | 0.881    | 1.103 | 0.809    | 9  |
| 5                                                       | 0.829        | 0.873 | 0.756    | 39 | 0.697    | 1.380 | 1.079    | 9  |
| Svob2007-chal2 HF STO-3G/MPA/BALLOON QM-OPT $R^2=0.953$ |              |       |          |    |          |       |          |    |
| 1                                                       | 0.966        | 0.429 | 0.308    | 38 | 0.888    | 0.702 | 0.637    | 10 |
| 2                                                       | 0.959        | 0.458 | 0.345    | 38 | 0.771    | 0.988 | 0.783    | 10 |
| 3                                                       | 0.957        | 0.493 | 0.399    | 38 | 0.944    | 0.489 | 0.363    | 10 |
| 4                                                       | 0.930        | 0.512 | 0.410    | 39 | 0.987    | 0.381 | 0.297    | 9  |
| 5                                                       | 0.964        | 0.399 | 0.314    | 39 | 0.902    | 0.803 | 0.665    | 9  |
| Svob2007-chal2 HF STO-3G/MPA/FROG2 MM-OPT $R^2=0.863$   |              |       |          |    |          |       |          |    |
| 1                                                       | 0.877        | 0.814 | 0.637    | 38 | 0.764    | 0.924 | 0.804    | 10 |
| 2                                                       | 0.912        | 0.676 | 0.528    | 38 | 0.647    | 1.943 | 1.202    | 10 |
| 3                                                       | 0.883        | 0.808 | 0.632    | 38 | 0.678    | 0.928 | 0.761    | 10 |
| 4                                                       | 0.802        | 0.862 | 0.697    | 39 | 0.961    | 0.849 | 0.559    | 9  |
| 5                                                       | 0.888        | 0.708 | 0.582    | 39 | 0.655    | 1.471 | 1.108    | 9  |
| Svob2007-chal2 HF STO-3G/MPA/FROG2 NO-OPT $R^2=0.894$   |              |       |          |    |          |       |          |    |
| 1                                                       | 0.917        | 0.670 | 0.539    | 38 | 0.819    | 1.022 | 0.918    | 10 |
| 2                                                       | 0.890        | 0.753 | 0.611    | 38 | 0.835    | 0.863 | 0.752    | 10 |



Table S5: Cross-validation results.

| Fold                                                      | Training set |       |          |    | Test set |       |          |    |
|-----------------------------------------------------------|--------------|-------|----------|----|----------|-------|----------|----|
|                                                           | $R^2$        | RMSE  | $\Delta$ | N  | $Q^2$    | RMSE  | $\Delta$ | N  |
| 3                                                         | 0.921        | 0.664 | 0.545    | 38 | 0.707    | 1.013 | 0.779    | 10 |
| 4                                                         | 0.838        | 0.780 | 0.607    | 39 | 0.980    | 0.471 | 0.428    | 9  |
| 5                                                         | 0.910        | 0.635 | 0.520    | 39 | 0.793    | 1.118 | 0.945    | 9  |
| Svob2007-chal2 HF STO-3G/MPA/FROG2 QM-OPT $R^2=0.939$     |              |       |          |    |          |       |          |    |
| 1                                                         | 0.954        | 0.500 | 0.394    | 38 | 0.840    | 0.744 | 0.651    | 10 |
| 2                                                         | 0.941        | 0.553 | 0.428    | 38 | 0.861    | 0.801 | 0.633    | 10 |
| 3                                                         | 0.942        | 0.568 | 0.450    | 38 | 0.933    | 0.479 | 0.410    | 10 |
| 4                                                         | 0.927        | 0.523 | 0.422    | 39 | 0.912    | 0.941 | 0.537    | 9  |
| 5                                                         | 0.951        | 0.468 | 0.387    | 39 | 0.889    | 0.853 | 0.672    | 9  |
| Svob2007-chal2 HF STO-3G/MPA/NCI MM-OPT $R^2=0.844$       |              |       |          |    |          |       |          |    |
| 1                                                         | 0.857        | 0.878 | 0.628    | 38 | 0.799    | 0.956 | 0.843    | 10 |
| 2                                                         | 0.892        | 0.749 | 0.595    | 38 | 0.489    | 2.919 | 1.668    | 10 |
| 3                                                         | 0.855        | 0.900 | 0.668    | 38 | 0.741    | 0.811 | 0.676    | 10 |
| 4                                                         | 0.780        | 0.909 | 0.734    | 39 | 0.965    | 0.992 | 0.594    | 9  |
| 5                                                         | 0.889        | 0.703 | 0.594    | 39 | 0.656    | 1.445 | 1.070    | 9  |
| Svob2007-chal2 HF STO-3G/MPA/NCI NO-OPT $R^2=0.870$       |              |       |          |    |          |       |          |    |
| 1                                                         | 0.891        | 0.768 | 0.581    | 38 | 0.912    | 1.039 | 0.888    | 10 |
| 2                                                         | 0.873        | 0.810 | 0.593    | 38 | 0.806    | 1.054 | 0.929    | 10 |
| 3                                                         | 0.876        | 0.832 | 0.646    | 38 | 0.857    | 0.706 | 0.547    | 10 |
| 4                                                         | 0.812        | 0.839 | 0.626    | 39 | 0.955    | 0.714 | 0.614    | 9  |
| 5                                                         | 0.920        | 0.598 | 0.506    | 39 | 0.658    | 1.451 | 1.033    | 9  |
| Svob2007-chal2 HF STO-3G/MPA/NCI QM-OPT $R^2=0.921$       |              |       |          |    |          |       |          |    |
| 1                                                         | 0.937        | 0.586 | 0.445    | 38 | 0.907    | 0.796 | 0.677    | 10 |
| 2                                                         | 0.940        | 0.555 | 0.410    | 38 | 0.414    | 1.760 | 1.102    | 10 |
| 3                                                         | 0.922        | 0.660 | 0.526    | 38 | 0.930    | 0.510 | 0.418    | 10 |
| 4                                                         | 0.887        | 0.652 | 0.499    | 39 | 0.969    | 0.586 | 0.540    | 9  |
| 5                                                         | 0.949        | 0.480 | 0.413    | 39 | 0.799    | 1.132 | 0.865    | 9  |
| Svob2007-chal2 HF STO-3G/MPA/OPENBABEL MM-OPT $R^2=0.858$ |              |       |          |    |          |       |          |    |
| 1                                                         | 0.873        | 0.830 | 0.659    | 38 | 0.781    | 0.948 | 0.857    | 10 |
| 2                                                         | 0.896        | 0.731 | 0.574    | 38 | 0.677    | 1.794 | 1.103    | 10 |
| 3                                                         | 0.876        | 0.832 | 0.659    | 38 | 0.670    | 0.909 | 0.772    | 10 |
| 4                                                         | 0.799        | 0.868 | 0.710    | 39 | 0.931    | 0.933 | 0.611    | 9  |
| 5                                                         | 0.891        | 0.698 | 0.569    | 39 | 0.635    | 1.521 | 1.147    | 9  |
| Svob2007-chal2 HF STO-3G/MPA/OPENBABEL NO-OPT $R^2=0.860$ |              |       |          |    |          |       |          |    |
| 1                                                         | 0.874        | 0.825 | 0.645    | 38 | 0.776    | 0.924 | 0.801    | 10 |
| 2                                                         | 0.896        | 0.733 | 0.572    | 38 | 0.685    | 1.769 | 1.104    | 10 |
| 3                                                         | 0.877        | 0.831 | 0.647    | 38 | 0.671    | 0.873 | 0.717    | 10 |
| 4                                                         | 0.803        | 0.860 | 0.706    | 39 | 0.918    | 0.937 | 0.627    | 9  |
| 5                                                         | 0.892        | 0.696 | 0.568    | 39 | 0.647    | 1.491 | 1.103    | 9  |
| Svob2007-chal2 HF STO-3G/MPA/OPENBABEL QM-OPT $R^2=0.946$ |              |       |          |    |          |       |          |    |
| 1                                                         | 0.961        | 0.462 | 0.349    | 38 | 0.877    | 0.722 | 0.643    | 10 |
| 2                                                         | 0.953        | 0.492 | 0.379    | 38 | 0.818    | 0.913 | 0.761    | 10 |
| 3                                                         | 0.947        | 0.544 | 0.442    | 38 | 0.958    | 0.414 | 0.323    | 10 |
| 4                                                         | 0.921        | 0.546 | 0.436    | 39 | 0.985    | 0.413 | 0.347    | 9  |
| 5                                                         | 0.957        | 0.437 | 0.373    | 39 | 0.904    | 0.821 | 0.639    | 9  |
| Svob2007-chal2 HF STO-3G/MPA/PUBCHEM MM-OPT $R^2=0.886$   |              |       |          |    |          |       |          |    |
| 1                                                         | 0.901        | 0.733 | 0.558    | 38 | 0.755    | 0.856 | 0.685    | 10 |
| 2                                                         | 0.908        | 0.689 | 0.531    | 38 | 0.653    | 1.874 | 1.134    | 10 |
| 3                                                         | 0.904        | 0.733 | 0.555    | 38 | 0.714    | 0.847 | 0.716    | 10 |
| 4                                                         | 0.831        | 0.796 | 0.639    | 39 | 0.981    | 0.670 | 0.439    | 9  |
| 5                                                         | 0.910        | 0.633 | 0.511    | 39 | 0.777    | 1.177 | 0.924    | 9  |
| Svob2007-chal2 HF STO-3G/MPA/PUBCHEM NO-OPT $R^2=0.874$   |              |       |          |    |          |       |          |    |
| 1                                                         | 0.911        | 0.694 | 0.535    | 38 | 0.832    | 1.238 | 1.091    | 10 |
| 2                                                         | 0.894        | 0.741 | 0.590    | 38 | 0.786    | 1.205 | 0.963    | 10 |
| 3                                                         | 0.889        | 0.787 | 0.633    | 38 | 0.810    | 0.846 | 0.656    | 10 |
| 4                                                         | 0.816        | 0.830 | 0.679    | 39 | 0.964    | 0.843 | 0.585    | 9  |
| 5                                                         | 0.878        | 0.738 | 0.610    | 39 | 0.877    | 1.010 | 0.745    | 9  |
| Svob2007-chal2 HF STO-3G/MPA/PUBCHEM QM-OPT $R^2=0.890$   |              |       |          |    |          |       |          |    |
| 1                                                         | 0.909        | 0.703 | 0.545    | 38 | 0.899    | 0.949 | 0.841    | 10 |

Table S5: Cross-validation results.

| Fold                                                  | Training set |       |          |    | Test set |       |          |    |
|-------------------------------------------------------|--------------|-------|----------|----|----------|-------|----------|----|
|                                                       | $R^2$        | RMSE  | $\Delta$ | N  | $Q^2$    | RMSE  | $\Delta$ | N  |
| 2                                                     | 0.892        | 0.748 | 0.619    | 38 | 0.897    | 0.827 | 0.701    | 10 |
| 3                                                     | 0.904        | 0.732 | 0.603    | 38 | 0.770    | 0.816 | 0.670    | 10 |
| 4                                                     | 0.844        | 0.764 | 0.632    | 39 | 0.962    | 0.686 | 0.615    | 9  |
| 5                                                     | 0.940        | 0.516 | 0.427    | 39 | 0.493    | 1.971 | 1.150    | 9  |
| Svob2007-chal2 HF STO-3G/MPA/RDKit MM-OPT $R^2=0.838$ |              |       |          |    |          |       |          |    |
| 1                                                     | 0.858        | 0.875 | 0.678    | 38 | 0.703    | 1.088 | 0.931    | 10 |
| 2                                                     | 0.859        | 0.853 | 0.680    | 38 | 0.769    | 1.349 | 1.004    | 10 |
| 3                                                     | 0.848        | 0.923 | 0.735    | 38 | 0.789    | 0.792 | 0.692    | 10 |
| 4                                                     | 0.778        | 0.913 | 0.748    | 39 | 0.968    | 0.903 | 0.618    | 9  |
| 5                                                     | 0.866        | 0.774 | 0.636    | 39 | 0.718    | 1.329 | 1.065    | 9  |
| Svob2007-chal2 HF STO-3G/MPA/RDKit QM-OPT $R^2=0.933$ |              |       |          |    |          |       |          |    |
| 1                                                     | 0.952        | 0.510 | 0.406    | 38 | 0.778    | 0.840 | 0.783    | 10 |
| 2                                                     | 0.935        | 0.577 | 0.435    | 38 | 0.813    | 0.923 | 0.650    | 10 |
| 3                                                     | 0.934        | 0.606 | 0.494    | 38 | 0.937    | 0.445 | 0.372    | 10 |
| 4                                                     | 0.918        | 0.556 | 0.452    | 39 | 0.984    | 1.002 | 0.725    | 9  |
| 5                                                     | 0.956        | 0.443 | 0.371    | 39 | 0.812    | 1.062 | 0.851    | 9  |
| Svob2007-chal2 HF STO-3G/MPA/RDKit MM-OPT $R^2=0.846$ |              |       |          |    |          |       |          |    |
| 1                                                     | 0.859        | 0.873 | 0.674    | 38 | 0.823    | 0.980 | 0.891    | 10 |
| 2                                                     | 0.889        | 0.757 | 0.605    | 38 | 0.669    | 1.911 | 1.119    | 10 |
| 3                                                     | 0.867        | 0.864 | 0.673    | 38 | 0.661    | 0.948 | 0.801    | 10 |
| 4                                                     | 0.792        | 0.884 | 0.720    | 39 | 0.933    | 1.055 | 0.636    | 9  |
| 5                                                     | 0.881        | 0.730 | 0.601    | 39 | 0.609    | 1.571 | 1.151    | 9  |
| Svob2007-chal2 HF STO-3G/MPA/RDKit NO-OPT $R^2=0.832$ |              |       |          |    |          |       |          |    |
| 1                                                     | 0.839        | 0.932 | 0.727    | 38 | 0.873    | 0.930 | 0.847    | 10 |
| 2                                                     | 0.873        | 0.812 | 0.645    | 38 | 0.569    | 1.557 | 1.126    | 10 |
| 3                                                     | 0.843        | 0.937 | 0.766    | 38 | 0.743    | 0.828 | 0.691    | 10 |
| 4                                                     | 0.812        | 0.840 | 0.718    | 39 | 0.899    | 1.326 | 0.850    | 9  |
| 5                                                     | 0.838        | 0.851 | 0.686    | 39 | 0.784    | 1.162 | 0.980    | 9  |

## 6 Quality Criteria for Testing of Selected EEM QSPR Models

Table S6: Quality criteria for testing of selected EEM QSPR models.  
QSPR model description: phenols, charges: EEM (B3LYP/6-31G\*/NPA),  
3D structure: NCI with no optimization

| Quality criteria | $R^2$ | RMSE  | $\Delta$ |
|------------------|-------|-------|----------|
| Training set     | 0.906 | 0.639 | 0.503    |
| Test set         | 0.889 | 0.771 | 0.596    |

QSPR model description: phenols, charges: EEM (HF/STO-3G/MPA),  
3D structure: RDKit with no optimization

| Quality criteria | $R^2$ | RMSE  | $\Delta$ |
|------------------|-------|-------|----------|
| Training set     | 0.894 | 0.677 | 0.504    |
| Test set         | 0.869 | 0.824 | 0.631    |

## 7 Description of Making Dissociated and Associated Form of Molecules

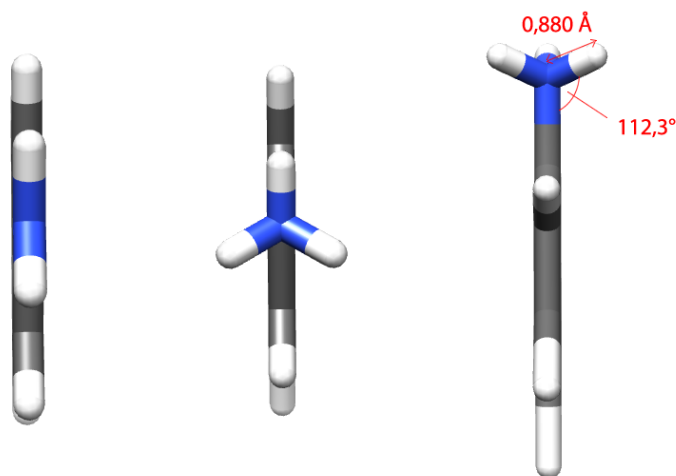

Figure S1: Aniline with its associated form according our simple rules.

Dissociated form of molecule was simply done by removing of hydrogen atom and associated forms was done based simple rules inspired by experimental crystal structure of CCDC-196349[1]. Both hydrogens from amino group were removed and new hydrogen atoms were added with bond length N-H 0.880 Å, bond angle C-N-H 112.3° and dihedral angle respective to the benzene ring 0°, 120° and 240° (see Figure S1).

## 8 EEM Models Statistics

Table S7: Number and percentage of EEM QSPR models with  $R^2$  higher than a defined limit for individual charge calculation approaches.

| EEM charge calculation approach | $R^2$      |              |         | $R^2_{chg}$ |
|---------------------------------|------------|--------------|---------|-------------|
|                                 | $\geq 0.9$ | $(0.9, 0.8>$ | $< 0.8$ |             |
| <b>Svob2007_chal2</b>           | 67%        | 30%          | 4%      | 0.869       |
| <b>Chaves2006</b>               | 89%        | 11%          | 0%      | 0.898       |
| <b>Bult2002_npa</b>             | 86%        | 14%          | 0%      | 0.884       |
| <b>Bult2004_aim</b>             | 88%        | 12%          | 0%      | 0.883       |

Note:  $R^2_{chg}$  is the average value of  $R^2$  for all QSPR models, which use charges calculated by a given EEM charge calculation approach.

Table S8: Number and percentage of EEM QSPR models with  $R^2$  higher than a defined limit for individual classes of molecules.

| Class of molecules      | $R^2$      |              |         | $R^2_{mol}$ |
|-------------------------|------------|--------------|---------|-------------|
|                         | $\geq 0.9$ | $(0.9, 0.8>$ | $< 0.8$ |             |
| <b>Phenols</b>          | 62%        | 38%          | 0%      | 0%          |
| <b>Carboxylic acids</b> | 18%        | 50%          | 29%     | 3%          |
| <b>Anilines</b>         | 28%        | 51%          | 21%     | 0%          |

Note:  $R^2_{mol}$  is the average value of  $R^2$  for all QSPR models, which were built for a given class of molecules.

Table S9: Percentage of EEM QSPR models with given  $R^2$  for individual 3D structure sources.

| Source    | Optimization | $R^2$      |               |               |           |
|-----------|--------------|------------|---------------|---------------|-----------|
|           |              | $\geq 0.9$ | $(0.9, 0.85>$ | $(0.85, 0.8>$ | $< 0.8$   |
| Balloon   | none         | 25%        | 42%           | 33%           | 0%        |
|           | MM           | 25%        | 50%           | 25%           | 0%        |
|           | <b>QM</b>    | <b>58%</b> | <b>33%</b>    | <b>0%</b>     | <b>8%</b> |
| Frog2     | none         | 17%        | 67%           | 17%           | 0%        |
|           | MM           | 33%        | 58%           | 8%            | 0%        |
|           | <b>QM</b>    | <b>58%</b> | <b>33%</b>    | <b>8%</b>     | <b>0%</b> |
| NCI       | <b>none</b>  | <b>25%</b> | <b>67%</b>    | <b>8%</b>     | <b>0%</b> |
|           | mM           | 33%        | 33%           | 33%           | 0%        |
|           | <b>QM</b>    | <b>50%</b> | <b>33%</b>    | <b>17%</b>    | <b>0%</b> |
| OpenBabel | none         | 25%        | 42%           | 33%           | 0%        |
|           | MM           | 33%        | 42%           | 25%           | 0%        |
|           | <b>QM</b>    | <b>67%</b> | <b>25%</b>    | <b>8%</b>     | <b>0%</b> |
| PubChem   | <b>none</b>  | <b>33%</b> | <b>67%</b>    | <b>0%</b>     | <b>0%</b> |
|           | MM           | 25%        | 75%           | 0%            | 0%        |
|           | <b>QM</b>    | <b>42%</b> | <b>50%</b>    | <b>8%</b>     | <b>0%</b> |
| RDKit     | none         | 25%        | 42%           | 33%           | 0%        |
|           | UFF          | 33%        | 25%           | 42%           | 0%        |
|           | MM           | 25%        | 58%           | 17%           | 0%        |
|           | <b>QM</b>    | <b>50%</b> | <b>42%</b>    | <b>0%</b>     | <b>8%</b> |

Note: The optimization procedures which produce the best QSPR models for each source of 3D structures are marked in bold font.

## 9 Geometrical Properties and Troubles of Selected Structures

### 9.1 Class of Molecules: Phenols, Anilines

Troublesome 3D structure source ( $R^2 < 0.8$  for at least one QSPR model):

- RDKit, no optimization

#### Reasons:

- Wrong (non-planar) modeling of benzene cycle  
Example: NSC\_4969

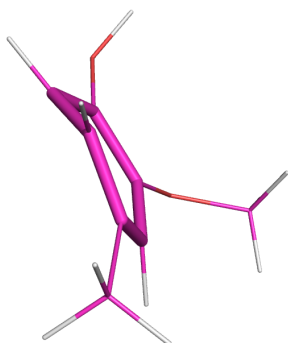

- Steric interactions of substituents are not considered  
Example: NSC\_5105

Correct structure (NCI, no opt.):

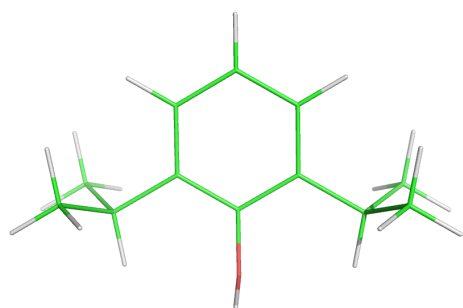

Incorrect structure (RDKit, no opt.):

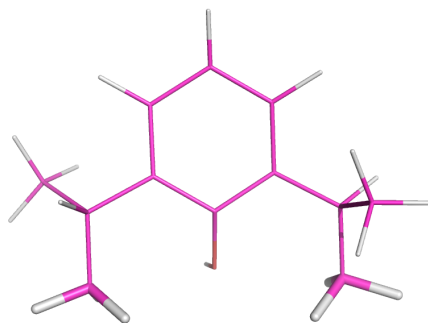

○ Non-standard orientation of substituents relative to the ring

Example: NSC\_1552

Correct structure (NCL, no opt.):

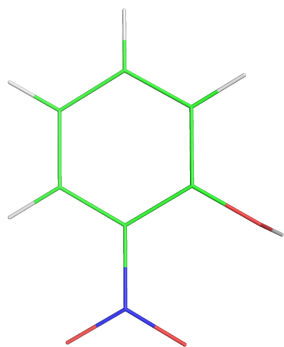

Incorrect structure (RDKit, no opt.):

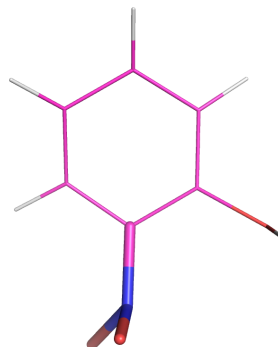

## 9.2 Class of Molecules: Carboxylic Acids

**Troublesome 3D structure source** ( $R^2 < 0.8$  for at least one QSPR model):

- Balloon (all types of optimization)
- OpenBabel (all types of optimization)
- RDKit (all types of optimization except MM-UFF)

### Reasons:

◦ Incorrect modelling of  $-\text{COOH}$  group:

Example: NSC\_179

Correct structure (NCI, no opt.):

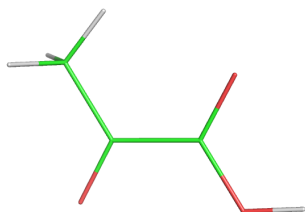

Incorrect structure (RDKit, no opt.):

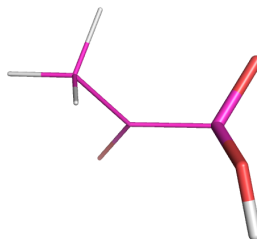

Incorrect structure (Balloon, no opt.):

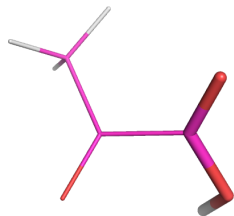



o Nonstandard orientation (turn) of -COOH group against the rest of molecule:

Example: NSC\_8999

Correct structure (NCI, no opt.):

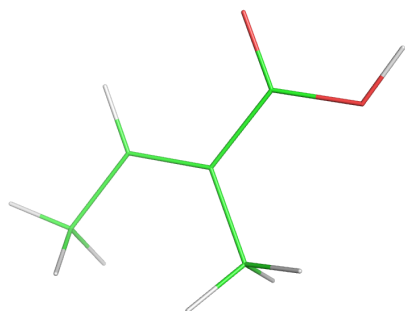

Incorrect structure (RDKit, no opt.):

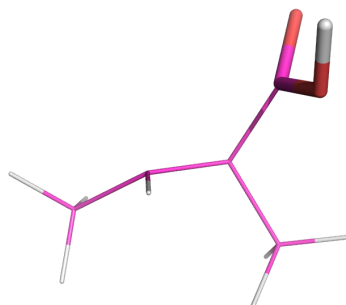

o Incorrect modelling of -COOH group:

Example: NSC\_67957

2D structure:

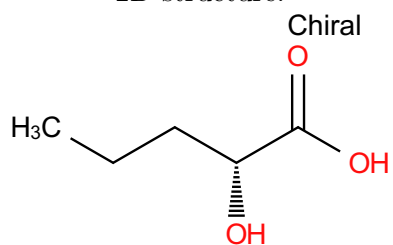

Correct structure (NCI, no opt.):

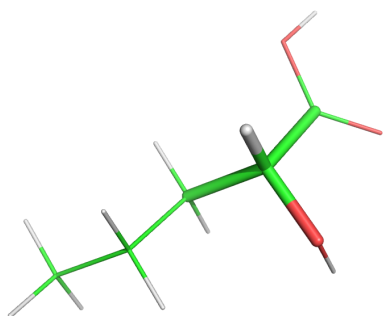

Incorrect structure (RDKit, UFF):

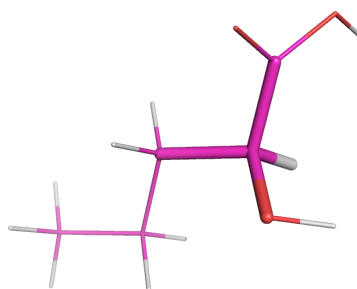

Incorrect structure (Balloon, no opt.):

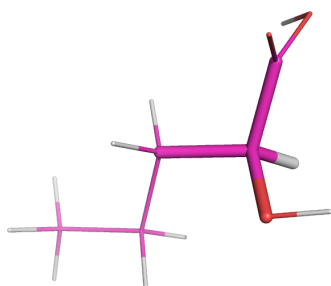

Incorrect structure (Balloon, MM):

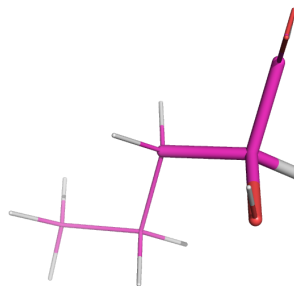

## 10 Statistical Test of Sensitivity of 3D Structure Source

The sensitivity of a particular QSPR model to a change of molecular class was analyzed via a statistical test, which compared correlation coefficients of three independent populations (i.e. molecular classes). These classes were phenols (with  $n_1 = 60$  molecules), carboxylic acids (with  $n_2 = 82$  molecules) and anilines (with  $n_3 = 48$  molecules). The comparison was done independently for all 4 *ab-initio* QM charge calculation approaches used in our study (i.e., HF, STO-3G, MPA; B3LYP, 6-31G\*, MPA; B3LYP, 6-31G\*, NPA; B3LYP, 6-31G\*, AIM).

Specifically, we tested the null hypothesis:  $H_0 : \rho_1 = \rho_2 = \rho_3$ , where  $\rho$  is the correlation coefficient, against an alternative hypothesis:  $H_1 : \exists i, j$  for which  $\rho_i \neq \rho_j$ .

The test is based on Fisher’s z-transformation:

$$z = \frac{1}{2} \ln \frac{(1+r)}{(1-r)} \quad (1)$$

where  $R$  is the Pearson correlation coefficient.

After an application of the z-transformation to the hypotheses  $H_0$  and  $H_1$ , we obtain these new hypotheses:

$$H'_0 : z_1 = z_2 = z_3 = \bar{z}, \text{ where:}$$

$$\bar{z} = \frac{z_1(n_1 - 3) + z_2(n_2 - 3) + z_3(n_3 - 3)}{n_1 - 3 + n_2 - 3 + n_3 - 3} \quad (2)$$

is a mean of  $z$  weighted by  $n - 3$ .

$$H'_1 : \exists i \text{ for which } z_i \neq \bar{z}.$$

Therefore, the tested statistics is described by this equation:

$$K = (n_1 - 3)(z_1 - \bar{z})^2 + (n_2 - 3)(z_2 - \bar{z})^2 + (n_3 - 3)(z_3 - \bar{z})^2 \quad (3)$$

Under the null hypothesis, statistic  $K$  follows the  $\chi^2$  distribution with  $k - 1$  degrees of freedom, where  $k$  is the number of populations. The test was performed with a statistical level  $\alpha = 0.05$ .

Table S10: Results of the statistical analysis used for analysis of a 3D structure source sensitivity to a change of a molecular class.

| Source    | Opt. | HF, STO-3G, MPA |      |          | B3LYP, 6-31G*, MPA |      |          | B3LYP, 6-31G*, NPA |      |          | B3LYP, 6-31G*, AIM |      |          |
|-----------|------|-----------------|------|----------|--------------------|------|----------|--------------------|------|----------|--------------------|------|----------|
|           |      | $K$             | $p$  | Decision | $K$                | $p$  | Decision | $K$                | $p$  | Decision | $K$                | $p$  | Decision |
| Balloon   | none | 2.92            | 0.23 | 1        | 24.45              | 0    | 0        | 6.22               | 0.04 | 0        | 3.98               | 0.14 | 1        |
|           | MM   | 2.25            | 0.32 | 1        | 44.28              | 0    | 0        | 13.52              | 0    | 0        | 3.97               | 0.14 | 1        |
|           | QM   | 4.36            | 0.11 | 1        | 51.41              | 0    | 0        | 8.13               | 0.02 | 0        | 6.57               | 0.04 | 0        |
| Frog2     | none | 1.98            | 0.37 | 1        | 1.42               | 0.49 | 1        | 2.01               | 0.37 | 1        | 0.86               | 0.65 | 1        |
|           | MM   | 10.62           | 0    | 0        | 27.02              | 0    | 0        | 9.04               | 0.01 | 0        | 0.49               | 0.78 | 1        |
|           | QM   | 14.68           | 0    | 0        | 28.43              | 0    | 0        | 4.77               | 0.09 | 1        | 5.48               | 0.06 | 1        |
| NCI       | none | 1.09            | 0.58 | 1        | 20.32              | 0    | 0        | 9.16               | 0.01 | 0        | 15.68              | 0    | 0        |
|           | MM   | 1.49            | 0.48 | 1        | 12.51              | 0    | 0        | 5.19               | 0.07 | 1        | 0.65               | 0.72 | 1        |
|           | QM   | 2.84            | 0.24 | 1        | 13.96              | 0    | 0        | 4.36               | 0.11 | 1        | 0.88               | 0.64 | 1        |
| OpenBabel | none | 13.14           | 0    | 0        | 71.26              | 0    | 0        | 23.71              | 0    | 0        | 13.1               | 0    | 0        |
|           | MM   | 18.14           | 0    | 0        | 75.13              | 0    | 0        | 25.91              | 0    | 0        | 12.16              | 0    | 0        |
|           | QM   | 14.78           | 0    | 0        | 66.68              | 0    | 0        | 22.02              | 0    | 0        | 9.22               | 0.01 | 0        |
| PubChem   | none | 5.98            | 0.05 | 1        | 8.94               | 0.01 | 0        | 2.52               | 0.28 | 1        | 1.67               | 0.43 | 1        |
|           | MM   | 5.91            | 0.05 | 1        | 23.25              | 0    | 0        | 10.24              | 0.01 | 0        | 2.54               | 0.28 | 1        |
|           | QM   | 3.01            | 0.22 | 1        | 19.84              | 0    | 0        | 1.21               | 0.55 | 1        | 3.22               | 0.2  | 1        |
| RDKit     | none | 1.65            | 0.44 | 1        | 9.5                | 0.01 | 0        | 0.88               | 0.64 | 1        | 2.74               | 0.25 | 1        |
|           | UFF  | 10.32           | 0.01 | 0        | 41.71              | 0    | 0        | 25.55              | 0    | 0        | 28.99              | 0    | 0        |
|           | MM   | 5.84            | 0.05 | 1        | 44.14              | 0    | 0        | 28.66              | 0    | 0        | 9.78               | 0.01 | 0        |
|           | QM   | 7.83            | 0.02 | 0        | 47.4               | 0    | 0        | 12.27              | 0    | 0        | 3.94               | 0.14 | 1        |

## 11 QSPR Models Limitations

The QSPR models provided in the manuscript have the following limitations:

- They are applicable only for the class of molecules, for which they were parameterized (i.e., phenols, carboxylic acids and anilines).
- They require the same type of partial atomic charges, for which they were parameterized (e.g, B3LYP, 6-31G\*, MPA; PM6, MPA; Gasteiger-Marsili etc.).
- The quality criteria describing the QSPR models are mentioned with 3 digits precision, but the third digit has lower accuracy. The reason is, the input partial atomic charges have 3 digit precision, but the experimental  $pK_a$  values have only 2 digit precision.

## References

- [1] Lopez-Dupla, E.; Jones, P. G.; Vancea, F. Secondary bonding interactions in some di- and trihaloanilinium halides. *Z. Naturforsch. B Chem. Sci.*, **2003**, *58b*, 191–200.
